# Supplementary material for: Recruitment of mRNAs to P granules by condensation with intrinsically-disordered proteins
Source: eLife. 2020 Jan 24;9:e52896. doi: 10.7554/eLife.52896 (PMC7007223; doi:10.7554/eLife.52896)
Supplement: Figure 1—source data 1. [file elife-52896-fig1-data1.xlsx]

## Sheet: compile_smFISH_area_Fig1D
In situ signal
Gene name	cgh-1	puf-5	F35G2	nos-2	T20F5	csr1	F35C11_5	C18A3.5	ppw2
granule size	0.371706	0.379179	0.25436	0.290143	0.269	0.289461	0.306615	0.527115	0.236273
	0.379783	0.414385	0.420556	0.4098	0.2465	0.160963	0.256379	0.569395	0.170356
	0.343476	0.351462	0.308593	0.28675	0.2465	0.271529	0.391368	0.569395	0.14352
	0.464367	0.432944	0.3155	0.265346	0.240071	0.231891	0.3135	0.59308	0.168415
	0.598357		0.281619	0.418111		0.185732	0.477667	0.59308
	average read count from 2 MEG-3 iCLIP
Gene name	cgh-1	puf-5	F35G2	nos-2	T20F5	csr1	F35C11_5	C18A3.5	ppw2
average MEG-3 iCLIP counts	2499	2515	255	298	41	102	436	661	15
