# Supplementary material for: Recruitment of mRNAs to P granules by condensation with intrinsically-disordered proteins
Source: eLife. 2020 Jan 24;9:e52896. doi: 10.7554/eLife.52896 (PMC7007223; doi:10.7554/eLife.52896)
Supplement: Figure 2—source data 1. [file elife-52896-fig2-data1.xlsx]

## Sheet: Heatshock experiments Fig2E
		Heat shock		In situ intensity		GFP intensity		Ratio for ploting
		embryo #1		dao5_granules sum	pbs7_granule sum	M3GFP_granules		dao-5/MEG-3GFP	pbs-7/MEG-3GFP
			slice 1	355235	931305	1.52404e+06		0.233087	0.611075
			slice 2	474067	1.24572e+06	2.06792e+06		0.229249	0.602404
			slice 3	236767	594059	1.03189e+06		0.229451	0.575702
			slice 4	280407	734930	1.29489e+06		0.216549	0.567561
			slice 5	244542	619307	974395		0.250968	0.635581
			slice 6	317241	717952	1.2113e+06		0.261902	0.592714
			slice 7	103949	233725	466436		0.222857	0.501087
			slice 8	105239	235933	370337		0.28417	0.637076
		embryo #2		dao5_granules sum	pbs7_granule sum	M3GFP_granules		dao-5/MEG-3GFP	pbs-7/MEG-3GFP
			slice 1	434222	1.05744e+06	2.3278e+06		0.186538	0.454267
			slice 2	758295	1.50631e+06	3.64977e+06		0.207765	0.412713
			slice 3	233336	580617	1.38985e+06		0.167886	0.417756
			slice 4	292493	545701	1.44016e+06		0.203098	0.378917
			slice 5	392272	858480	1.86696e+06		0.210112	0.459827
			slice 6	248015	521665	1.05756e+06		0.234516	0.493271
			slice 7	90801	148951	363192		0.250008	0.410116
			slice 8	210071	390974	695413		0.302081	0.562218
		No Heat shock		in situ intensity		GFP intensity		Ratio for ploting
		embryo #3		C1_dao5_granules sum	C2_pbs7_granule sum	C3_M3GFP_granules		dao-5/MEG-3GFP	pbs-7/MEG-3GFP
			slice 1	213614	569785	2.48284e+06		0.0860362	0.229489
			slice 2	233641	452509	2.15355e+06		0.108491	0.210123
			slice 3	282762	461374	2.35874e+06		0.119878	0.195602
			slice 4	159415	272431	1.47451e+06		0.108114	0.18476
			slice 5	135300	212028	1.15569e+06		0.117073	0.183464
			slice 6	98288.1	150716	1.03772e+06		0.0947153	0.145238
			slice 7	49107.8	60321.2	420181		0.116873	0.14356
			slice 8	59444.9	91700.2	670263		0.0886889	0.136812
		embryo #4		C1_dao5_granules sum	C2_pbs7_granule sum	C3_M3GFP_granules		dao-5/MEG-3GFP	pbs-7/MEG-3GFP
			slice 1	35413.8	96645.4	408597		0.0866717	0.23653
			slice 2	60650.3	199686	836550		0.0725005	0.238702
			slice 3	62318.9	178955	750147		0.0830756	0.23856
			slice 4	40052.4	124049	477240		0.0839251	0.259931
			slice 5	22880.9	91642.8	346580		0.0660191	0.26442
			slice 6	24027.4	83121.9	383376		0.0626732	0.216815
			slice 7	11196.4	63103.6	276625		0.040475	0.228119
			slice 8	15412.7	50795.4	308943		0.0498886	0.164417
