# Supplementary material for: Recruitment of mRNAs to P granules by condensation with intrinsically-disordered proteins
Source: eLife. 2020 Jan 24;9:e52896. doi: 10.7554/eLife.52896 (PMC7007223; doi:10.7554/eLife.52896)
Supplement: Figure 2—source data 2. [file elife-52896-fig2-data2.xlsx]

## Sheet: Heat&Puro treatment_Fig2G
Area(granule_size)	treatment
0.045	CHX
0.045	CHX
0.045	CHX
0.045	CHX
0.045	CHX
0.045	CHX
0.045	CHX
0.045	CHX
0.045	CHX
0.045	CHX
0.045	CHX
0.09	CHX
0.045	CHX
0.045	CHX
0.045	CHX
0.045	CHX
0.045	CHX
0.045	CHX
0.09	CHX
0.045	CHX
0.582	CHX
0.045	CHX
0.045	CHX
0.045	CHX
0.045	CHX
0.045	CHX
0.045	CHX
0.045	CHX
0.09	CHX
0.045	CHX
0.045	CHX
0.045	CHX
0.045	CHX
0.045	CHX
0.045	CHX
0.045	CHX
0.045	CHX
0.134	CHX
0.09	CHX
0.045	CHX
0.045	CHX
0.134	CHX
0.045	CHX
0.045	CHX
0.09	CHX
0.045	CHX
0.403	CHX
0.09	CHX
0.09	CHX
0.045	CHX
0.045	CHX
0.045	CHX
0.09	CHX
0.134	CHX
0.045	CHX
0.224	CHX
0.045	CHX
0.045	CHX
0.045	CHX
0.045	CHX
0.358	CHX
0.045	CHX
0.045	CHX
0.045	CHX
0.045	CHX
0.045	CHX
0.045	CHX
0.045	CHX
0.134	CHX
0.045	CHX
0.09	CHX
0.045	CHX
0.045	CHX
0.045	CHX
0.09	CHX
0.045	CHX
0.045	CHX
0.045	CHX
0.045	CHX
0.045	CHX
0.045	CHX
0.045	CHX
0.045	CHX
0.045	CHX
0.045	CHX
0.09	CHX
0.134	CHX
0.045	CHX
0.134	CHX
0.358	CHX
0.358	CHX
0.045	CHX
0.045	CHX
0.224	CHX
0.045	CHX
0.045	CHX
0.045	CHX
0.045	CHX
0.134	CHX
0.045	CHX
0.134	CHX
0.045	CHX
0.224	CHX
0.045	CHX
0.045	CHX
0.179	CHX
0.134	CHX
0.09	CHX
0.09	CHX
0.045	CHX
0.09	CHX
0.224	CHX
0.045	CHX
0.045	CHX
0.09	CHX
0.045	CHX
0.045	CHX
0.045	CHX
0.09	CHX
0.045	CHX
0.045	CHX
0.045	CHX
0.045	CHX
0.045	CHX
0.045	CHX
0.045	CHX
0.179	CHX
0.045	CHX
0.045	CHX
0.045	CHX
0.045	CHX
0.045	CHX
0.045	CHX
0.045	CHX
0.045	CHX
0.045	CHX
0.045	CHX
0.358	CHX
0.045	CHX
0.045	CHX
0.09	CHX
0.045	CHX
0.045	CHX
0.045	CHX
0.045	CHX
0.09	CHX
0.045	CHX
0.045	CHX
0.045	CHX
0.09	CHX
0.09	CHX
0.045	CHX
0.09	CHX
0.09	CHX
0.045	CHX
0.045	CHX
0.09	CHX
0.045	CHX
0.09	CHX
0.045	CHX
0.045	CHX
0.045	CHX
0.045	CHX
0.045	CHX
0.045	CHX
0.09	CHX
0.045	CHX
0.045	CHX
0.045	CHX
0.045	CHX
0.045	CHX
0.045	CHX
0.045	CHX
0.045	CHX
0.045	CHX
0.045	CHX
0.045	CHX
0.045	CHX
0.045	CHX
0.045	CHX
0.09	CHX
0.045	CHX
0.045	CHX
0.045	CHX
0.045	CHX
0.045	CHX
0.045	CHX
0.045	CHX
0.045	CHX
0.045	CHX
0.045	CHX
0.045	CHX
0.045	CHX
0.045	CHX
0.045	CHX
0.045	CHX
0.045	CHX
0.09	CHX
0.179	CHX
0.179	CHX
0.045	CHX
0.179	CHX
0.045	CHX
0.045	CHX
0.09	CHX
0.045	CHX
0.045	CHX
0.045	CHX
0.045	CHX
0.09	CHX
0.134	CHX
0.045	CHX
0.134	CHX
0.09	CHX
0.045	CHX
0.045	CHX
0.045	CHX
0.045	CHX
0.045	CHX
0.045	CHX
0.045	CHX
0.224	CHX
0.045	CHX
0.045	CHX
0.045	CHX
0.134	CHX
0.045	CHX
0.269	CHX
0.045	CHX
0.045	CHX
0.09	CHX
0.09	CHX
0.045	CHX
0.269	CHX
0.045	CHX
0.045	CHX
0.045	CHX
0.045	CHX
0.045	CHX
0.09	CHX
0.045	CHX
0.045	CHX
0.045	CHX
0.448	CHX
0.134	CHX
0.09	CHX
0.045	CHX
0.045	CHX
0.045	CHX
0.045	CHX
0.09	CHX
0.09	CHX
0.045	CHX
0.045	CHX
0.09	CHX
0.224	CHX
0.045	CHX
0.09	CHX
0.224	CHX
0.045	CHX
0.09	CHX
0.045	CHX
0.045	CHX
0.045	CHX
0.045	CHX
0.045	CHX
0.045	CHX
0.134	CHX
0.045	CHX
0.09	CHX
0.045	CHX
0.09	CHX
0.358	CHX
0.269	CHX
0.045	CHX
0.045	CHX
0.358	CHX
0.09	CHX
0.269	CHX
0.045	CHX
0.179	CHX
0.045	CHX
0.045	CHX
0.045	CHX
0.045	CHX
0.09	CHX
0.09	CHX
0.045	CHX
0.224	CHX
0.045	CHX
0.045	CHX
0.134	CHX
0.045	CHX
0.045	CHX
0.045	CHX
0.045	CHX
0.224	CHX
0.045	CHX
0.045	CHX
0.045	CHX
0.045	CHX
0.045	CHX
0.045	CHX
0.09	CHX
0.045	CHX
0.045	CHX
0.045	CHX
0.045	CHX
0.045	CHX
0.269	CHX
0.045	CHX
0.045	CHX
0.045	CHX
0.045	CHX
0.045	CHX
0.09	CHX
0.045	CHX
0.045	CHX
0.045	CHX
0.045	CHX
0.045	CHX
0.045	CHX
0.09	CHX
0.09	CHX
0.045	CHX
0.045	CHX
0.045	CHX
0.045	CHX
0.09	CHX
0.448	CHX
0.045	CHX
0.045	CHX
0.314	CHX
0.045	CHX
0.179	CHX
0.045	CHX
0.045	CHX
0.045	CHX
0.045	CHX
0.134	CHX
0.09	CHX
0.045	CHX
0.045	CHX
0.045	CHX
0.045	CHX
0.045	CHX
0.045	CHX
0.045	CHX
0.045	CHX
0.045	CHX
0.179	CHX
0.045	CHX
0.045	CHX
0.09	CHX
0.045	CHX
0.045	CHX
0.045	CHX
0.09	CHX
0.045	CHX
0.045	CHX
0.045	CHX
0.045	CHX
0.045	CHX
0.045	CHX
0.09	CHX
0.045	CHX
0.045	CHX
1.299	CHX
0.179	CHX
0.045	CHX
0.045	CHX
0.045	CHX
0.045	CHX
0.045	CHX
0.045	CHX
0.045	CHX
0.045	CHX
0.045	CHX
0.045	CHX
0.045	CHX
0.045	CHX
0.045	CHX
0.045	CHX
0.045	CHX
0.045	CHX
0.045	CHX
0.045	CHX
0.045	CHX
0.134	CHX
0.045	CHX
0.045	CHX
0.045	CHX
0.224	CHX
0.493	CHX
0.045	CHX
0.09	CHX
0.045	CHX
0.045	CHX
0.358	CHX
0.045	CHX
0.045	CHX
0.179	CHX
0.045	CHX
0.045	CHX
0.045	CHX
0.09	CHX
0.09	CHX
0.045	CHX
0.045	CHX
0.045	CHX
0.09	CHX
0.045	CHX
0.269	CHX
0.09	CHX
0.179	CHX
0.045	CHX
0.045	CHX
0.045	CHX
0.045	CHX
0.09	CHX
0.179	CHX
0.09	CHX
0.09	CHX
0.045	CHX
0.269	CHX
0.045	CHX
0.09	CHX
0.045	CHX
0.045	CHX
0.134	CHX
0.045	CHX
0.045	CHX
0.045	CHX
0.045	CHX
0.045	CHX
0.09	CHX
0.045	CHX
0.09	CHX
0.045	CHX
0.045	CHX
0.045	CHX
0.045	CHX
0.045	CHX
0.179	CHX
0.09	CHX
0.045	CHX
0.045	CHX
0.045	CHX
0.403	CHX
0.09	CHX
0.269	CHX
0.045	CHX
0.09	CHX
0.045	CHX
0.045	CHX
0.493	CHX
0.045	CHX
0.045	CHX
0.179	CHX
0.09	CHX
0.269	CHX
0.224	CHX
0.045	CHX
0.045	CHX
0.179	CHX
0.045	CHX
0.224	CHX
0.045	CHX
0.045	CHX
0.045	CHX
0.09	CHX
0.045	CHX
0.045	CHX
0.134	CHX
0.358	CHX
0.045	CHX
0.134	CHX
0.045	CHX
0.045	CHX
0.045	CHX
0.045	CHX
0.045	CHX
0.045	CHX
0.134	CHX
0.045	CHX
0.09	CHX
0.045	CHX
0.09	CHX
0.045	CHX
0.314	CHX
0.045	CHX
0.179	CHX
0.537	CHX
0.045	CHX
0.045	CHX
0.045	CHX
0.09	CHX
0.045	CHX
0.045	CHX
0.269	CHX
0.045	CHX
0.045	CHX
0.045	CHX
0.314	CHX
0.179	CHX
0.09	CHX
0.224	CHX
0.09	CHX
1.03	CHX
0.045	CHX
0.045	CHX
0.045	CHX
0.045	CHX
0.224	CHX
0.045	CHX
0.134	CHX
0.045	CHX
0.045	CHX
0.045	CHX
0.045	CHX
0.045	CHX
0.045	CHX
0.045	CHX
0.045	CHX
0.045	CHX
0.045	CHX
0.045	CHX
0.045	CHX
0.045	CHX
0.403	CHX
0.045	CHX
0.045	CHX
0.045	CHX
0.045	CHX
0.045	CHX
0.045	CHX
0.09	CHX
0.045	CHX
0.045	CHX
0.045	CHX
0.179	CHX
0.134	CHX
0.045	CHX
0.045	CHX
0.045	CHX
0.045	CHX
0.179	CHX
0.045	CHX
0.045	CHX
0.09	CHX
0.045	CHX
0.09	CHX
0.448	CHX
0.045	CHX
0.045	CHX
0.045	CHX
0.045	CHX
0.045	CHX
0.045	CHX
0.045	CHX
0.045	CHX
0.09	CHX
0.045	CHX
0.09	CHX
0.045	CHX
0.045	CHX
0.045	CHX
0.134	CHX
0.045	CHX
0.09	CHX
0.045	CHX
0.045	CHX
0.045	CHX
0.045	CHX
0.045	CHX
0.045	CHX
0.045	CHX
0.09	CHX
0.224	CHX
0.09	CHX
0.045	CHX
0.672	CHX
0.134	CHX
0.045	CHX
0.045	CHX
0.045	CHX
0.09	CHX
0.045	CHX
0.045	CHX
0.09	CHX
0.045	CHX
0.045	CHX
0.314	CHX
0.045	CHX
0.045	CHX
0.045	CHX
0.045	CHX
0.224	CHX
0.045	CHX
0.045	CHX
0.224	CHX
0.045	CHX
0.045	CHX
0.045	CHX
0.403	CHX
0.045	CHX
0.045	CHX
0.134	CHX
0.045	CHX
0.045	CHX
0.045	CHX
0.045	CHX
0.09	CHX
0.045	CHX
0.045	CHX
0.09	CHX
0.045	CHX
0.045	CHX
0.045	CHX
0.045	CHX
0.314	CHX
0.045	CHX
0.045	CHX
0.045	CHX
0.09	CHX
0.045	CHX
0.045	CHX
0.09	CHX
0.045	CHX
0.045	CHX
0.134	CHX
0.045	CHX
0.134	CHX
0.045	CHX
0.537	CHX
0.045	CHX
0.045	CHX
0.09	CHX
0.045	CHX
0.045	CHX
0.045	CHX
0.045	CHX
0.045	CHX
0.045	CHX
0.045	CHX
0.045	CHX
0.09	CHX
0.045	CHX
0.045	CHX
0.09	CHX
0.045	CHX
0.403	CHX
0.09	CHX
0.045	CHX
0.045	CHX
0.045	CHX
0.09	CHX
0.045	CHX
0.045	CHX
0.045	CHX
0.045	CHX
0.045	CHX
0.045	CHX
0.045	CHX
0.045	CHX
0.045	CHX
0.045	CHX
0.045	CHX
0.045	CHX
0.179	CHX
0.045	CHX
0.045	CHX
0.045	CHX
0.045	CHX
0.045	CHX
0.045	CHX
0.045	CHX
0.045	CHX
0.045	CHX
0.045	CHX
0.045	CHX
0.045	CHX
0.358	CHX
0.045	CHX
0.045	CHX
0.045	CHX
0.045	CHX
0.045	CHX
0.09	CHX
0.045	CHX
0.134	CHX
0.045	CHX
0.179	CHX
0.09	CHX
0.045	CHX
0.134	CHX
0.045	CHX
0.045	CHX
0.045	CHX
0.045	CHX
0.09	CHX
0.045	CHX
0.045	CHX
0.09	CHX
0.045	CHX
0.045	CHX
0.09	CHX
0.045	CHX
0.045	CHX
0.09	CHX
0.045	CHX
0.045	CHX
0.045	CHX
0.045	CHX
0.045	CHX
0.045	CHX
0.045	CHX
0.045	CHX
0.045	CHX
0.134	CHX
0.179	CHX
0.045	CHX
0.045	CHX
0.627	CHX
0.224	CHX
0.09	CHX
0.045	CHX
0.269	CHX
0.537	CHX
0.045	CHX
0.045	CHX
0.045	CHX
0.045	CHX
0.045	CHX
0.045	CHX
0.045	CHX
0.045	CHX
0.045	CHX
0.045	CHX
0.269	CHX
0.045	CHX
0.134	CHX
0.224	CHX
0.045	CHX
0.045	CHX
0.045	CHX
0.045	CHX
0.134	CHX
0.045	CHX
0.045	CHX
0.045	CHX
0.045	CHX
0.134	CHX
0.403	CHX
0.045	CHX
0.09	CHX
0.134	CHX
0.045	CHX
0.09	CHX
0.045	CHX
0.09	CHX
0.045	CHX
0.134	CHX
0.045	CHX
0.045	CHX
0.045	CHX
0.045	CHX
0.045	CHX
0.134	CHX
0.045	CHX
0.045	CHX
0.179	CHX
0.045	CHX
0.045	CHX
0.045	CHX
0.045	CHX
0.045	CHX
0.045	CHX
0.179	CHX
0.045	CHX
0.045	CHX
0.045	CHX
0.045	CHX
0.179	CHX
0.045	CHX
1.209	CHX
0.045	CHX
0.134	CHX
0.09	CHX
0.045	CHX
0.269	CHX
0.045	CHX
0.134	CHX
0.045	CHX
0.045	CHX
0.09	CHX
0.045	CHX
0.358	CHX
0.045	CHX
0.045	CHX
0.045	CHX
0.045	CHX
0.045	CHX
0.045	CHX
0.045	CHX
0.09	CHX
0.045	CHX
0.09	CHX
0.314	CHX
0.134	CHX
0.045	CHX
0.09	CHX
0.045	CHX
0.045	CHX
0.045	CHX
0.045	CHX
0.045	CHX
0.09	CHX
0.09	CHX
0.045	CHX
0.224	CHX
0.134	CHX
0.045	CHX
0.045	CHX
0.403	CHX
0.09	CHX
0.045	CHX
0.045	CHX
0.045	CHX
0.045	CHX
0.09	CHX
0.179	CHX
0.045	CHX
0.09	CHX
0.045	CHX
0.045	CHX
0.045	CHX
0.045	CHX
0.045	CHX
0.045	CHX
0.045	CHX
0.045	CHX
0.045	CHX
0.045	CHX
0.09	CHX
0.045	CHX
0.134	CHX
0.09	CHX
0.403	CHX
0.045	CHX
0.045	CHX
0.045	CHX
0.045	CHX
0.045	CHX
0.045	CHX
0.045	CHX
0.134	CHX
0.045	CHX
0.09	CHX
0.045	CHX
0.045	CHX
0.045	CHX
0.09	CHX
0.134	CHX
0.045	CHX
0.045	CHX
0.045	CHX
0.045	CHX
0.045	CHX
0.045	CHX
0.045	CHX
0.045	CHX
0.045	CHX
0.09	CHX
0.134	CHX
0.045	CHX
0.045	CHX
0.09	CHX
0.179	CHX
0.045	CHX
0.045	CHX
0.134	CHX
0.045	CHX
0.448	CHX
0.045	CHX
0.045	CHX
0.582	CHX
0.045	CHX
0.314	CHX
0.493	CHX
0.045	CHX
0.045	CHX
0.134	CHX
0.045	CHX
0.045	CHX
0.045	CHX
0.045	CHX
0.045	CHX
0.09	CHX
0.179	CHX
0.045	CHX
0.045	CHX
0.045	CHX
0.134	CHX
0.045	CHX
0.09	CHX
0.045	CHX
0.269	CHX
0.045	CHX
0.134	CHX
0.358	CHX
0.761	CHX
0.045	CHX
0.179	CHX
0.045	CHX
0.045	CHX
0.045	CHX
0.09	CHX
0.941	CHX
0.045	CHX
0.045	CHX
0.045	CHX
0.045	CHX
0.09	CHX
0.045	CHX
0.045	CHX
0.045	CHX
0.045	CHX
0.045	CHX
0.134	CHX
0.045	CHX
0.269	CHX
0.045	CHX
0.045	CHX
0.045	CHX
0.179	CHX
0.179	CHX
0.045	CHX
0.09	CHX
0.045	CHX
0.045	CHX
0.045	CHX
0.09	CHX
0.09	CHX
0.134	CHX
0.045	CHX
0.134	CHX
0.045	CHX
0.134	CHX
0.045	CHX
0.045	CHX
0.045	CHX
0.09	CHX
0.045	CHX
0.045	CHX
0.045	CHX
1.612	CHX
0.045	CHX
0.045	CHX
0.045	CHX
0.045	CHX
0.09	CHX
0.134	CHX
0.179	CHX
0.224	CHX
0.448	CHX
0.09	CHX
0.045	CHX
0.045	CHX
0.045	CHX
0.269	CHX
0.134	CHX
0.09	CHX
0.09	CHX
0.045	CHX
0.045	CHX
0.045	CHX
0.09	CHX
0.224	CHX
0.09	CHX
0.179	CHX
0.045	CHX
0.045	CHX
0.09	CHX
0.09	CHX
0.134	CHX
0.09	CHX
0.224	CHX
0.045	CHX
0.045	CHX
0.179	CHX
0.045	CHX
0.179	CHX
0.045	CHX
0.045	CHX
0.045	CHX
0.358	CHX
0.045	CHX
0.045	CHX
0.045	CHX
0.045	CHX
0.045	CHX
0.045	CHX
0.09	CHX
0.045	CHX
0.134	CHX
0.09	CHX
0.045	CHX
0.045	CHX
0.045	CHX
0.045	CHX
0.672	CHX
0.045	CHX
0.09	CHX
0.045	CHX
0.179	CHX
0.045	CHX
0.045	CHX
0.045	CHX
0.09	CHX
0.045	CHX
0.045	CHX
0.045	CHX
0.045	CHX
0.134	CHX
1.747	CHX
0.045	CHX
0.224	CHX
0.09	CHX
0.045	CHX
0.448	CHX
0.045	CHX
0.134	CHX
0.09	CHX
0.448	CHX
0.09	CHX
0.045	CHX
0.358	CHX
0.045	CHX
0.045	CHX
0.09	CHX
0.045	CHX
0.134	CHX
0.045	CHX
0.09	CHX
0.269	CHX
0.09	CHX
0.179	CHX
0.045	CHX
0.045	CHX
0.045	CHX
0.09	CHX
0.134	CHX
0.314	CHX
0.134	CHX
0.045	CHX
0.045	CHX
0.09	CHX
0.09	CHX
0.045	CHX
0.269	CHX
0.134	CHX
0.134	CHX
0.045	CHX
0.045	CHX
0.045	CHX
0.045	CHX
0.045	CHX
0.134	CHX
0.045	CHX
0.045	CHX
0.045	CHX
0.269	CHX
0.045	CHX
0.09	CHX
1.12	CHX
0.09	CHX
0.537	CHX
0.09	CHX
0.045	CHX
0.09	CHX
0.045	CHX
0.179	CHX
0.045	CHX
0.045	CHX
0.045	CHX
0.045	CHX
0.09	CHX
0.045	CHX
0.045	CHX
0.045	CHX
0.224	CHX
0.045	CHX
0.045	CHX
0.134	CHX
0.045	CHX
0.045	CHX
0.134	CHX
0.045	CHX
0.09	CHX
0.045	CHX
0.134	CHX
0.045	CHX
0.09	CHX
0.09	CHX
0.045	CHX
0.179	CHX
0.045	CHX
0.045	CHX
0.09	CHX
0.045	CHX
0.09	CHX
0.045	CHX
0.045	CHX
0.985	CHX
0.045	CHX
0.045	CHX
0.09	CHX
0.134	CHX
0.045	CHX
0.045	CHX
0.09	CHX
0.761	CHX
0.045	CHX
0.09	CHX
0.045	CHX
0.045	CHX
0.045	CHX
0.045	CHX
0.045	CHX
0.134	CHX
0.045	CHX
0.045	CHX
0.179	CHX
0.045	CHX
0.448	CHX
0.045	CHX
0.045	CHX
0.045	CHX
0.045	CHX
0.09	CHX
0.045	CHX
0.045	CHX
0.314	CHX
0.045	CHX
0.179	CHX
0.045	CHX
0.09	CHX
0.045	CHX
0.045	CHX
0.09	CHX
0.045	CHX
0.045	CHX
0.045	CHX
0.09	CHX
0.09	CHX
0.045	CHX
0.09	CHX
0.045	CHX
0.403	CHX
0.045	CHX
0.045	CHX
0.045	CHX
0.045	CHX
0.045	CHX
0.045	CHX
0.045	CHX
0.045	CHX
0.09	CHX
0.045	CHX
0.09	CHX
0.045	CHX
0.09	CHX
0.09	CHX
0.045	CHX
0.045	CHX
0.179	CHX
0.045	CHX
0.045	CHX
0.045	CHX
0.314	CHX
0.269	CHX
0.045	CHX
0.09	CHX
0.09	CHX
0.045	CHX
0.045	CHX
0.672	CHX
0.045	CHX
0.045	CHX
0.045	CHX
0.045	CHX
0.045	CHX
0.045	CHX
0.045	CHX
0.045	CHX
0.045	CHX
0.045	CHX
0.045	CHX
0.045	CHX
0.09	CHX
0.045	CHX
0.045	CHX
0.045	CHX
0.045	CHX
0.045	CHX
0.045	CHX
0.045	CHX
0.045	CHX
0.045	CHX
0.045	CHX
0.045	CHX
0.134	CHX
0.045	CHX
0.045	CHX
0.314	CHX
0.134	CHX
0.045	CHX
0.045	CHX
0.045	CHX
0.045	CHX
0.179	CHX
0.09	CHX
0.09	CHX
0.045	CHX
0.045	CHX
0.045	CHX
0.717	CHX
0.045	CHX
0.045	CHX
0.045	CHX
0.179	CHX
0.134	CHX
0.045	CHX
0.045	CHX
0.045	CHX
0.045	CHX
0.045	CHX
0.045	CHX
0.134	CHX
0.045	CHX
0.045	CHX
0.045	CHX
0.134	CHX
0.045	CHX
0.045	CHX
0.403	CHX
0.045	CHX
0.045	CHX
0.09	CHX
0.179	CHX
0.045	CHX
0.045	CHX
0.045	CHX
0.045	CHX
0.045	CHX
0.045	CHX
0.09	CHX
0.045	CHX
0.045	CHX
0.09	CHX
0.045	CHX
0.045	CHX
0.045	CHX
0.045	CHX
0.045	CHX
0.09	CHX
0.045	CHX
0.045	CHX
0.045	CHX
0.045	CHX
0.045	CHX
0.045	CHX
0.493	CHX
0.045	CHX
0.09	CHX
0.045	CHX
0.672	CHX
0.045	CHX
0.09	CHX
0.045	CHX
0.09	CHX
0.045	CHX
0.134	CHX
0.045	CHX
0.045	CHX
0.045	CHX
0.045	CHX
0.045	CHX
0.045	CHX
0.045	CHX
0.045	CHX
0.045	CHX
0.045	CHX
0.09	CHX
0.09	CHX
0.045	CHX
0.045	CHX
0.045	CHX
0.045	CHX
0.045	CHX
0.045	CHX
0.045	CHX
0.985	CHX
0.045	CHX
0.045	CHX
0.045	CHX
0.045	CHX
0.045	CHX
0.09	CHX
0.09	CHX
0.045	CHX
0.045	CHX
0.179	CHX
0.045	CHX
0.134	CHX
0.09	CHX
0.045	CHX
0.09	CHX
0.09	CHX
0.179	CHX
0.045	CHX
0.045	CHX
0.045	CHX
0.09	CHX
0.045	CHX
0.045	CHX
0.045	CHX
0.045	CHX
0.045	CHX
0.045	CHX
0.045	CHX
0.134	CHX
0.045	CHX
0.045	CHX
0.179	CHX
0.09	CHX
0.224	CHX
0.045	CHX
0.045	CHX
0.134	CHX
0.045	CHX
0.045	CHX
0.045	CHX
0.045	CHX
0.045	CHX
0.045	CHX
0.045	CHX
0.09	CHX
0.224	CHX
0.045	CHX
0.045	CHX
0.09	CHX
0.045	CHX
0.045	CHX
0.045	CHX
0.224	CHX
0.134	CHX
0.045	CHX
0.045	CHX
0.045	CHX
0.045	CHX
0.09	CHX
0.045	CHX
0.09	CHX
0.045	CHX
0.134	CHX
0.045	CHX
0.045	CHX
0.045	CHX
0.045	CHX
0.045	CHX
0.09	CHX
0.045	CHX
0.896	CHX
0.045	CHX
0.045	CHX
0.09	CHX
0.179	CHX
0.045	CHX
0.045	CHX
0.134	CHX
0.134	CHX
0.314	CHX
0.09	CHX
0.134	CHX
0.269	CHX
0.045	CHX
0.045	CHX
0.269	CHX
0.09	CHX
0.045	CHX
0.045	CHX
0.045	CHX
0.134	CHX
0.045	CHX
0.09	CHX
0.09	CHX
0.045	CHX
0.09	CHX
0.045	CHX
0.134	CHX
0.045	CHX
0.045	CHX
0.045	CHX
0.09	CHX
0.045	CHX
0.134	CHX
0.045	CHX
0.134	CHX
0.045	CHX
0.269	CHX
0.045	CHX
0.045	CHX
0.09	CHX
0.09	CHX
0.045	CHX
0.045	CHX
0.179	CHX
0.09	CHX
0.045	CHX
0.045	CHX
0.045	CHX
0.045	CHX
0.045	CHX
0.09	CHX
0.09	CHX
0.358	CHX
0.224	CHX
0.09	CHX
0.09	CHX
0.09	CHX
0.045	CHX
0.045	CHX
0.045	CHX
0.314	CHX
0.134	CHX
0.045	CHX
0.045	CHX
0.045	CHX
0.045	CHX
0.045	CHX
0.045	CHX
0.627	CHX
0.045	CHX
0.045	CHX
0.045	CHX
0.045	CHX
0.134	CHX
0.045	CHX
0.045	CHX
0.045	CHX
0.134	CHX
0.09	CHX
0.045	CHX
0.09	CHX
0.045	CHX
0.045	CHX
0.045	CHX
0.045	CHX
0.045	CHX
0.045	CHX
0.045	CHX
0.045	CHX
0.045	CHX
0.045	CHX
0.045	CHX
0.09	CHX
0.045	CHX
0.045	CHX
0.045	CHX
0.045	CHX
0.045	CHX
0.045	CHX
0.045	CHX
0.045	CHX
0.045	CHX
0.045	CHX
0.045	CHX
0.045	CHX
0.09	CHX
0.045	CHX
0.179	CHX
0.403	CHX
0.09	CHX
0.09	CHX
0.045	CHX
0.045	CHX
0.045	CHX
0.045	CHX
0.045	CHX
0.09	CHX
0.045	CHX
0.045	CHX
0.045	CHX
0.09	CHX
0.045	CHX
0.045	CHX
0.045	CHX
0.045	CHX
0.09	CHX
0.045	CHX
0.045	CHX
0.09	CHX
0.045	CHX
0.045	CHX
0.134	CHX
0.045	CHX
0.134	CHX
0.09	CHX
0.045	CHX
0.045	CHX
0.045	CHX
0.045	CHX
0.045	CHX
0.179	CHX
0.09	CHX
0.09	CHX
0.045	CHX
0.045	CHX
0.493	CHX
0.045	CHX
0.045	CHX
0.045	CHX
0.134	CHX
0.045	CHX
0.045	CHX
0.045	CHX
0.045	CHX
0.045	CHX
0.09	CHX
0.09	CHX
0.672	CHX
0.045	CHX
0.045	CHX
0.045	CHX
0.045	CHX
0.045	CHX
0.045	CHX
0.045	CHX
0.134	CHX
0.045	CHX
0.045	CHX
0.045	CHX
0.045	CHX
0.045	CHX
0.045	CHX
0.045	CHX
0.09	CHX
0.045	CHX
0.493	CHX
0.045	CHX
0.134	CHX
0.045	CHX
0.179	CHX
0.269	CHX
0.045	CHX
0.045	CHX
0.045	CHX
0.045	CHX
0.045	CHX
0.627	CHX
0.045	CHX
0.045	CHX
0.09	CHX
0.09	CHX
0.045	CHX
0.045	CHX
0.045	CHX
0.045	CHX
0.09	CHX
0.045	CHX
0.045	CHX
0.045	CHX
0.045	CHX
0.09	CHX
0.045	CHX
0.045	CHX
0.896	CHX
0.045	CHX
0.045	CHX
0.045	CHX
0.045	CHX
0.045	CHX
0.045	CHX
0.045	CHX
0.045	CHX
0.045	CHX
0.134	CHX
0.045	CHX
0.045	CHX
0.045	CHX
0.045	CHX
0.045	CHX
0.134	CHX
0.134	CHX
1.209	CHX
1.523	CHX
0.045	CHX
0.045	CHX
0.045	CHX
0.045	CHX
0.045	CHX
0.045	CHX
0.09	CHX
0.179	CHX
0.045	CHX
0.045	CHX
1.03	CHX
0.045	CHX
0.045	CHX
0.045	CHX
0.045	CHX
0.09	CHX
0.045	CHX
0.179	CHX
0.045	CHX
0.045	CHX
0.134	CHX
0.09	CHX
0.09	CHX
0.045	CHX
0.045	CHX
0.448	CHX
0.09	CHX
0.045	CHX
0.134	CHX
0.045	CHX
0.717	CHX
0.09	CHX
0.179	CHX
0.045	CHX
0.09	CHX
0.045	CHX
0.045	CHX
0.045	CHX
0.045	CHX
0.045	CHX
0.269	CHX
0.045	CHX
0.09	CHX
0.09	CHX
0.134	CHX
0.045	CHX
0.09	CHX
0.045	CHX
0.045	CHX
0.045	CHX
0.045	CHX
0.045	CHX
0.448	CHX
0.045	CHX
0.045	CHX
0.045	CHX
0.179	CHX
0.269	CHX
0.045	CHX
0.045	CHX
0.045	CHX
0.045	CHX
0.045	CHX
0.045	CHX
0.045	CHX
0.045	CHX
0.045	CHX
0.045	CHX
0.045	CHX
0.045	CHX
0.045	CHX
0.045	CHX
0.403	CHX
0.358	CHX
0.134	CHX
0.045	CHX
0.09	CHX
0.269	CHX
0.537	CHX
0.045	CHX
0.045	CHX
0.045	CHX
0.045	CHX
0.269	CHX
0.09	CHX
0.045	CHX
0.045	CHX
0.179	CHX
0.09	CHX
0.358	CHX
0.045	CHX
0.179	CHX
0.09	CHX
0.045	CHX
0.045	CHX
0.045	CHX
0.09	CHX
0.045	CHX
0.045	CHX
0.045	CHX
0.045	CHX
0.045	CHX
0.09	CHX
0.045	CHX
0.045	CHX
0.045	CHX
0.045	CHX
0.493	CHX
0.045	CHX
0.045	CHX
0.09	CHX
0.045	CHX
0.045	CHX
0.224	CHX
0.045	CHX
0.09	CHX
0.537	CHX
0.045	CHX
0.179	CHX
0.045	CHX
0.045	CHX
0.269	CHX
0.045	CHX
0.045	CHX
0.045	CHX
0.045	CHX
0.045	CHX
0.269	CHX
0.045	CHX
0.314	CHX
0.09	CHX
0.045	CHX
0.09	CHX
0.134	CHX
0.09	CHX
0.045	CHX
0.09	CHX
0.045	CHX
0.134	CHX
0.179	CHX
0.045	CHX
0.224	CHX
0.269	CHX
0.09	CHX
0.045	CHX
0.09	CHX
0.045	CHX
0.179	CHX
0.134	CHX
0.045	CHX
0.134	CHX
0.045	CHX
0.269	CHX
0.045	CHX
0.09	CHX
0.045	CHX
0.045	CHX
0.045	CHX
0.045	CHX
0.09	CHX
0.045	CHX
0.045	CHX
0.09	CHX
0.09	CHX
0.045	CHX
0.045	CHX
0.09	CHX
0.09	CHX
0.045	CHX
0.134	CHX
0.09	CHX
0.09	CHX
0.045	CHX
0.045	CHX
0.09	CHX
0.09	CHX
0.537	CHX
0.045	CHX
0.179	CHX
0.134	CHX
0.045	CHX
0.045	CHX
0.179	CHX
0.045	CHX
0.134	CHX
0.045	CHX
0.045	CHX
0.134	CHX
0.045	CHX
0.09	CHX
0.045	CHX
0.045	CHX
0.045	CHX
1.209	CHX
0.09	CHX
0.045	CHX
0.045	CHX
0.045	CHX
0.045	CHX
0.045	CHX
0.045	CHX
0.045	CHX
0.045	CHX
0.134	CHX
0.045	CHX
0.045	CHX
0.045	CHX
0.045	CHX
0.045	CHX
0.045	CHX
0.045	CHX
0.224	CHX
0.224	CHX
0.045	CHX
0.134	CHX
0.045	CHX
0.045	CHX
0.045	CHX
0.045	CHX
0.851	CHX
0.045	CHX
0.045	CHX
0.045	CHX
0.09	CHX
0.045	CHX
0.045	CHX
0.045	CHX
0.045	CHX
0.045	CHX
0.269	CHX
0.09	CHX
0.717	CHX
0.045	CHX
0.045	CHX
0.045	CHX
0.045	CHX
1.344	CHX
0.045	CHX
0.045	CHX
0.045	CHX
0.045	CHX
0.045	CHX
0.045	CHX
0.045	CHX
0.045	CHX
0.045	CHX
0.045	CHX
0.045	CHX
0.09	CHX
0.045	CHX
0.045	CHX
0.045	CHX
0.045	CHX
0.045	CHX
0.09	CHX
0.134	CHX
0.134	CHX
0.045	CHX
0.09	CHX
0.134	CHX
0.045	CHX
0.045	CHX
0.134	CHX
0.314	CHX
0.045	CHX
0.045	CHX
0.179	CHX
0.09	CHX
0.045	CHX
0.045	CHX
0.045	CHX
0.045	CHX
0.045	CHX
0.045	CHX
0.224	CHX
0.045	CHX
0.045	CHX
0.045	CHX
0.09	CHX
0.358	CHX
0.09	CHX
0.134	CHX
0.134	CHX
0.045	CHX
0.045	CHX
0.045	CHX
0.09	CHX
0.045	CHX
0.045	CHX
0.045	CHX
0.134	CHX
0.045	CHX
0.045	CHX
0.045	CHX
0.045	CHX
0.448	CHX
0.045	CHX
0.045	CHX
0.09	CHX
0.045	CHX
0.045	CHX
0.045	CHX
0.045	CHX
0.09	CHX
0.045	CHX
0.179	CHX
0.045	CHX
0.045	CHX
0.045	CHX
0.045	CHX
0.09	CHX
0.134	CHX
0.045	CHX
0.134	CHX
0.045	CHX
0.09	CHX
0.045	CHX
0.045	CHX
0.045	CHX
0.045	CHX
0.09	CHX
0.045	CHX
0.09	CHX
0.045	CHX
0.045	CHX
0.045	CHX
0.045	CHX
0.045	CHX
0.045	CHX
0.045	CHX
0.045	CHX
0.045	CHX
0.045	CHX
0.09	CHX
0.045	CHX
0.045	CHX
0.045	CHX
0.045	CHX
0.09	CHX
0.045	CHX
0.09	CHX
0.045	CHX
0.045	CHX
0.045	CHX
0.045	CHX
0.045	CHX
0.045	CHX
0.179	CHX
0.09	CHX
0.045	CHX
0.045	CHX
0.134	CHX
0.045	CHX
0.045	CHX
1.165	CHX
1.612	CHX
0.09	CHX
0.045	CHX
0.045	CHX
0.09	CHX
1.344	CHX
0.045	CHX
0.358	CHX
0.403	CHX
0.045	CHX
1.568	CHX
0.045	CHX
0.045	CHX
0.09	CHX
0.045	CHX
0.448	CHX
0.045	CHX
0.045	CHX
1.165	CHX
0.045	CHX
0.134	CHX
0.045	CHX
0.045	CHX
0.314	CHX
0.045	CHX
0.537	CHX
0.045	CHX
0.045	CHX
0.045	CHX
0.09	CHX
0.045	CHX
0.045	CHX
0.045	CHX
0.045	CHX
0.045	CHX
0.09	CHX
0.045	CHX
0.045	CHX
0.269	CHX
0.045	CHX
0.045	CHX
0.045	CHX
0.224	CHX
0.179	CHX
0.045	CHX
0.134	CHX
[truncated: 11,237 more rows]
