# Supplementary material for: Recruitment of mRNAs to P granules by condensation with intrinsically-disordered proteins
Source: eLife. 2020 Jan 24;9:e52896. doi: 10.7554/eLife.52896 (PMC7007223; doi:10.7554/eLife.52896)
Supplement: Figure 4—source data 1. [file elife-52896-fig4-data1.xlsx]

## Sheet: %ofcondensates_Fig4B
Log (MEG-3 Intensity)	Y51F10.2	nos-2	skr-2	R04D3.2	C46A5.6	pbs-7	T19H12.2	nil-5	dao-5	pU	No RNA
1.3	0	0.0343	0	0	0	0	0	0	0	0	0
1.5	0	0	0	0	0	0	0	0	0	0	0
1.7	0	0	0	0	0	0	0	0	0	0.463	0
1.9	0.0384025	0	0	0	0	0	0	0	0.053	0	0
2.1	0	0.0343	0	0	0	0	0	0	0	0	0
2.3	0	0.0686	0	0	0	0	0.0494	0	0	0	0
2.5	0.0384025	0.1716	0.0683	0.1128	0.0494	0	0.0537	0.0516	0.0401	0.463	0
2.7	0.15361	0.7037	0.3867	0.5672	0.519	0.0247	0.4618	0.0258	0.0931	0	0.1161
2.9	0.890537	4.9718	1.7021	2.4002	2.5457	0.4943	1.6206	0.784	0.5471	1.3889	0
3.1	7.07417	8.8632	8.5424	8.193	8.1068	6.0801	9.4258	8.3512	6.2714	1.9404	2.858
3.3	12.0172	12.3535	13.5484	10.8204	11.2704	14.5576	13.3979	14.2768	12.5879	4.0577	4.2349
3.5	13.3229	12.8054	12.7464	12.7801	12.3579	16.7573	15.7571	15.195	15.6584	2.7642	1.5922
3.7	12.5888	12.7598	14.4925	15.0629	14.7553	16.3124	15.1096	15.6879	15.9726	4.0509	5.0972
3.9	13.7805	11.1865	13.6904	13.5745	14.0633	14.261	14.3011	15.3119	13.5876	6.5496	3.4615
4.1	11.1606	10.4539	12.5348	10.8466	12.0366	12.2837	11.5167	12.1615	11.0476	10.049	4.9707
4.3	10.1298	8.5141	8.3243	10.2207	10.0099	8.6752	9.0755	8.165	9.6856	9.2184	4.7002
4.5	7.82443	6.5916	6.8337	7.1652	6.352	5.6599	5.0257	4.2657	5.088	5.6236	7.0282
4.7	5.60031	3.9363	3.8514	4.1699	4.35	3.04	2.6989	3.1174	4.4051	10.226	5.7293
4.9	2.5285	3.1127	1.2702	2.2225	2.1256	1.3347	0.9491	1.5542	2.3422	8.027	7.7795
5.1	1.6881	2.0883	1.192	1.0742	0.8403	0.4202	0.3714	0.397	1.2221	8.8508	7.5803
5.3	0.601101	0.7897	0.4869	0.578	0.3955	0.0494	0.1363	0.2838	0.7191	8.027	7.0165
5.5	0.370687	0.3261	0.1818	0.1128	0.1236	0.0494	0.0247	0.1637	0.1203	4.7113	7.4524
5.7	0.115207	0.1316	0.1025	0.0495	0.0741	0	0.0247	0.1469	0.1461	5.2628	9.1445
5.9	0.0768049	0.0343	0.0452	0.0247	0.0247	0	0	0.0605	0.1733	2.8663	8.8616
6.1	0	0.0686	0	0.0247	0	0	0	0	0.1332	3.6084	4.7098
6.3	0	0	0	0	0	0	0	0	0.106	1.3889	4.0629
6.5	0	0	0	0	0	0	0	0	0	0.463	2.6809
6.7	0	0	0	0	0	0	0	0	0	0	0.4866
6.9	0	0	0	0	0	0	0	0	0	0	0.4367
7.1	0	0	0	0	0	0	0	0	0	0	0
7.3	0	0	0	0	0	0	0	0	0	0	0
7.5	0	0	0	0	0	0	0	0	0	0	0
7.7	0	0	0	0	0	0	0	0	0	0	0
