# Supplementary material for: Recruitment of mRNAs to P granules by condensation with intrinsically-disordered proteins
Source: eLife. 2020 Jan 24;9:e52896. doi: 10.7554/eLife.52896 (PMC7007223; doi:10.7554/eLife.52896)
Supplement: Figure 4—source data 2. [file elife-52896-fig4-data2.xlsx]

## Sheet: %RNAincondensates_Fig4C
% RNA in condensates
	Mean	StdDev
Y51F10.2	34.0062	7.57894
nos-2	46.0618	6.49361
skr-2	33.9933	2.50824
R04D3.2	43.5078	5.05163
C46A5.6	50.5615	2.76268
pbs-7	34.6832	2.76809
T19H12.2	33.797	1.63211
nil-5	34.2021	15.4515
dao-5	31.1591	4.85846
pU	6.04027	1.39338
No RNA	0	NA
