# Supplementary material for: Recruitment of mRNAs to P granules by condensation with intrinsically-disordered proteins
Source: eLife. 2020 Jan 24;9:e52896. doi: 10.7554/eLife.52896 (PMC7007223; doi:10.7554/eLife.52896)
Supplement: Figure 5—source data 1. [file elife-52896-fig5-data1.xlsx]

## Sheet: %MEG-3incondensates_Fig5B
% MEG-3 in condensates
nt Length	Mean	StdDev
0	31.9287	1.8554
30	27.6164	9.1559
100	59.4592	6.7482
200	77.7818	3.212
300	73.8766	4.796
600	78.069	0.6008
1242	82.2706	2.7773
