# Supplementary material for: Recruitment of mRNAs to P granules by condensation with intrinsically-disordered proteins
Source: eLife. 2020 Jan 24;9:e52896. doi: 10.7554/eLife.52896 (PMC7007223; doi:10.7554/eLife.52896)
Supplement: Figure 5—source data 2. [file elife-52896-fig5-data2.xlsx]

## Sheet: RecoveryRate_Fig5D
FRAP recovery rate
	Mean (s-1)	StdDev
30 nt	0.055633	0.0019016
100 nt	0.0064719	0.0003689
200 nt	0.00020401	2.0363e-05
300 nt	0.00027802	1.4696e-05
600 nt	0.00013122	1.4833e-05
Y51F10.2	0.00025158	1.7685e-05
nos-2	0.00021943	1.2592e-05
pbs-7	0.0002557	1.8741e-05
T19H12.2	0.00011096	2.8281e-05
