# Supplementary material for: Recruitment of mRNAs to P granules by condensation with intrinsically-disordered proteins
Source: eLife. 2020 Jan 24;9:e52896. doi: 10.7554/eLife.52896 (PMC7007223; doi:10.7554/eLife.52896)
Supplement: Figure 5—source data 3. [file elife-52896-fig5-data3.xlsx]

## Sheet: ExtrudedMEG3Syto14_Fig5F
Fraction of MEG-3 and Syto14 retained in extruded granules (IA/IB)
Time (sec)	MEG-3 Mean	StdDev	Syto14 Mean	Stdev
0	1	0	1	0
10	0.783043	0.204953	0.820491	0.118352
20	0.760389	0.20083	0.957822	0.114237
30	0.670024	0.184838	0.870673	0.0469021
40	0.651877	0.205316	0.889375	0.0674866
50	0.686951	0.220541	0.96	0.0907626
60	0.675861	0.217307	1.00703	0.118573
70	0.661451	0.210103	0.996905	0.100432
80	0.663587	0.191069	1.00571	0.185708
90	0.656664	0.177536	0.990096	0.177969
