# Supplementary material for: Recruitment of mRNAs to P granules by condensation with intrinsically-disordered proteins
Source: eLife. 2020 Jan 24;9:e52896. doi: 10.7554/eLife.52896 (PMC7007223; doi:10.7554/eLife.52896)
Supplement: Supplementary file 1. [file elife-52896-supp1.csv]

Table S1. List of MEG-3 bound, PGL-1 bound and P granule transcripts
WBID	SeqID	geneID	avg_mRNA_fpm	avg_ribosomeFootprint_fpm	Normalized_ribosomeFootprints	Read_count(Rep1_MEG-3::GFP_iCLIP)	Read_count(Rep2_MEG-3::GFP_iCLIP)	Read_count(Rep1_PGL-1::GFP_iCLIP)	Read_count(Rep2_PGL-1::GFP_iCLIP)	Read_count(Rep1_GFP_iCLIP)	Read_count(Rep2_GFP_iCLIP)	Rank_order(Rep1_MEG-3::GFP_iCLIP)	Rank_order(Rep2_MEG-3::GFP_iCLIP)	MEG-3 bound transcripts or P granule transcripts	PGL-1 bound transcript
WBGene00004241	F54C9.8	puf-5	92.02315902	13.41492012	0.145777653	2865	2123	35	174	64	3	1	2	P_granule_transcripts	NA
WBGene00000479	C07H6.5	cgh-1	283.2796513	231.6028023	0.817576558	2422	2568	85	293	67	7	2	1	P_granule_transcripts	PGL-1_bound
WBGene00001569	F52D2.4	gei-12	123.0431498	103.8639647	0.844126348	1986	635	119	27	8	0	3	31	P_granule_transcripts	NA
WBGene00021763	Y51F10.2	Y51F10.2	163.9925685	124.0967997	0.756722093	1640	1580	128	172	18	0	5	4	P_granule_transcripts	PGL-1_bound
WBGene00010351	H02I12.1	cbd-1	392.3024635	6.592745783	0.016805262	1255	2041	2	195	12	0	6	3	P_granule_transcripts	NA
WBGene00012484	Y18D10A.17	car-1	153.5304399	169.2617327	1.102463673	1174	859	72	94	46	5	7	12	P_granule_transcripts	PGL-1_bound
WBGene00013311	Y57G11C.15	sec-61	364.1668017	276.2991415	0.758715897	1005	1296	100	177	84	14	9	6	P_granule_transcripts	PGL-1_bound
WBGene00006699	C47E12.5	uba-1	441.7741655	331.4679044	0.750310748	999	1338	125	159	31	4	11	5	P_granule_transcripts	PGL-1_bound
WBGene00045388	C38C6.8	C38C6.8	246.2566392	0.767475291	0.003116567	997	889	3	64	0	3	12	10	P_granule_transcripts	NA
WBGene00009186	F27C8.6	trcs-1	217.5990529	4.382372164	0.020139666	919	738	5	137	30	3	13	18	P_granule_transcripts	NA
WBGene00004208	ZK675.1	ptc-1	116.426584	8.485406067	0.072882032	910	1056	21	105	26	2	14	8	P_granule_transcripts	NA
WBGene00001137	B0365.3	eat-6	142.8216944	14.16335589	0.099168099	882	778	104	108	29	2	15	16	P_granule_transcripts	PGL-1_bound
WBGene00013025	Y49A3A.2	vha-13	192.6718774	261.2706384	1.356039304	779	874	1	121	24	7	16	11	P_granule_transcripts	NA
WBGene00017548	F18A1.7	F18A1.7	109.7481095	63.75996608	0.580966418	777	532	148	48	42	1	17	46	P_granule_transcripts	NA
WBGene00002845	F57B9.2	let-711	1135.156697	882.6787233	0.777583152	759	648	16	157	16	0	18	28	P_granule_transcripts	NA
WBGene00010621	K07A12.2	egg-6	43.29997714	2.933485775	0.067747975	745	726	35	82	39	1	19	20	P_granule_transcripts	NA
WBGene00019127	F59G1.1	cgt-3	53.04855647	10.5485503	0.198847075	714	654	1	58	14	0	20	27	P_granule_transcripts	NA
WBGene00007352	C06A1.1	cdc-48.1	456.3117808	497.3289289	1.089888427	707	692	10	86	29	3	21	22	P_granule_transcripts	NA
WBGene00000474	M01E11.5	cey-3	166.5505571	30.80712552	0.184971615	668	291	1	50	4	1	22	134	P_granule_transcripts	NA
WBGene00000894	M110.5	dab-1	140.6135449	84.65488825	0.602039358	666	721	10	59	43	3	23	21	P_granule_transcripts	NA
WBGene00016739	C48A7.2	pitr-1	35.39335064	1.946581264	0.054998502	661	372	2	47	31	3	24	87	P_granule_transcripts	NA
WBGene00000473	F46F11.2	cey-2	236.6623209	47.32113192	0.199952116	628	779	2	94	5	2	25	15	P_granule_transcripts	NA
WBGene00020097	R144.7	larp-1	365.9350595	386.1261033	1.055176577	621	677	4	101	32	5	26	23	P_granule_transcripts	NA
WBGene00007463	C08H9.2	C08H9.2	1616.012857	2589.769653	1.602567481	588	621	15	125	48	4	27	34	P_granule_transcripts	NA
WBGene00003865	ZC513.6	oma-2	60.82861603	4.016601831	0.066031452	573	547	219	41	49	5	29	43	P_granule_transcripts	NA
WBGene00004984	ZC404.8	spn-4	324.7588983	320.1318186	0.985752262	560	728	59	124	98	4	30	19	P_granule_transcripts	NA
WBGene00010677	K08F4.2	gtbp-1	265.9645067	322.8198109	1.213770269	556	436	0	27	14	0	31	64	P_granule_transcripts	NA
WBGene00014097	ZK829.9	ZK829.9	56.58685143	1.812882916	0.032037176	552	314	2	89	21	0	33	115	P_granule_transcripts	NA
WBGene00022034	Y65B4BL.2	deps-1	113.7988251	81.05427033	0.71225929	552	589	106	55	10	1	33	38	P_granule_transcripts	NA
WBGene00003150	F49E11.1	mbk-2	584.131347	790.1812725	1.352745879	548	593	7	120	81	13	35	37	P_granule_transcripts	NA
WBGene00002250	W07G4.4	lap-2	118.1536151	164.1657475	1.389426361	546	264	1	30	8	3	36	155	P_granule_transcripts	NA
WBGene00006739	C41C4.6	ulp-4	79.91525017	56.66241508	0.709031317	525	375	10	50	26	0	37	86	P_granule_transcripts	NA
WBGene00011867	T20G5.1	chc-1	524.655949	715.146302	1.363076705	515	792	8	86	23	1	38	14	P_granule_transcripts	NA
WBGene00004078	F52E1.1	pos-1	524.6648904	863.8370347	1.646454814	512	675	52	92	123	2	39	25	P_granule_transcripts	NA
WBGene00010419	H28O16.1	H28O16.1	521.4135747	816.2521438	1.565460094	507	520	6	118	42	1	40	48	P_granule_transcripts	NA
WBGene00012020	T25E12.5	gyg-2	105.2460029	37.46537228	0.355979052	492	551	0	64	22	1	41	40	P_granule_transcripts	NA
WBGene00011449	T04H1.2	T04H1.2	80.04507414	45.63352946	0.57009791	482	200	1	22	6	4	42	235	P_granule_transcripts	NA
WBGene00022235	Y73B6BL.6	sqd-1	414.6969975	382.0057216	0.921168284	475	318	5	95	44	25	43	111	P_granule_transcripts	NA
WBGene00010665	K08E3.5	K08E3.5	138.5539084	94.66986578	0.683270987	455	676	11	77	30	2	44	24	P_granule_transcripts	NA
WBGene00009404	F35C11.5	F35C11.5	17.27126628	0.418118724	0.024208921	447	400	0	28	14	0	45	75	P_granule_transcripts	NA
WBGene00019628	K10D2.2	pup-2	196.8697494	106.7497374	0.54223535	447	615	14	100	26	24	45	36	P_granule_transcripts	NA
WBGene00004258	D2023.2	pyc-1	65.77455469	61.12927964	0.929375804	444	234	2	21	4	0	47	185	P_granule_transcripts	NA
WBGene00006727	F25B5.4	ubq-1	4000.403075	4073.800967	1.018347624	443	645	0	83	0	24	48	29	P_granule_transcripts	NA
WBGene00009119	F25H2.5	ndk-1	250.2803374	253.5572179	1.01309284	434	247	2	16	2	0	49	173	P_granule_transcripts	NA
WBGene00022127	Y71F9B.3	yop-1	61.39262592	152.360677	2.481742305	429	279	63	21	7	24	50	141	P_granule_transcripts	NA
WBGene00003912	C38D4.6	pal-1	142.3475135	145.4688746	1.021927753	423	183	13	14	41	0	51	278	P_granule_transcripts	NA
WBGene00004217	C32E8.8	ptr-2	48.51860443	4.528067042	0.093326407	420	454	2	72	19	0	52	59	P_granule_transcripts	NA
WBGene00003864	C09G9.6	oma-1	93.59152003	202.2504568	2.16099126	413	668	15	54	42	1	53	26	P_granule_transcripts	NA
WBGene00003795	F59A2.1	npp-9	238.3535499	139.1725361	0.583891182	412	499	0	88	36	4	54	53	P_granule_transcripts	NA
WBGene00015943	C18A3.5	tiar-1	498.963261	714.0989756	1.431165441	411	777	6	67	27	7	55	17	P_granule_transcripts	NA
WBGene00007028	C47D12.1	trr-1	854.4659717	279.7307466	0.32737494	403	175	0	95	1	21	56	302	P_granule_transcripts	NA
WBGene00013270	Y57A10A.31	Y57A10A.31	97.29974259	66.2178247	0.680554983	400	428	1	39	8	0	57	68	P_granule_transcripts	NA
WBGene00003964	H06O01.1	pdi-3	617.3638524	292.2732313	0.473421355	399	633	5	53	10	21	58	33	P_granule_transcripts	NA
WBGene00000915	C47E8.5	daf-21	1371.365349	1020.784387	0.744356264	398	347	1	53	27	11	59	99	P_granule_transcripts	NA
WBGene00016250	C30C11.4	hsp-110	199.605285	211.1295959	1.0577355	396	380	0	51	13	0	61	82	P_granule_transcripts	NA
WBGene00003559	ZK112.2	ncl-1	207.0248108	193.7627801	0.935939897	395	381	11	56	40	0	63	81	P_granule_transcripts	NA
WBGene00002005	F26D10.3	hsp-1	746.7530677	972.8558041	1.302781128	385	495	17	82	7	19	64	54	P_granule_transcripts	NA
WBGene00002192	C10C6.1	kin-4	225.4361217	151.0095316	0.669855081	384	135	1	53	7	0	65	440	P_granule_transcripts	NA
WBGene00018586	F48A11.5	ubxn-3	395.738631	522.7340609	1.320907336	383	190	1	49	1	0	66	263	P_granule_transcripts	NA
WBGene00003410	F21G4.2	mrp-4	65.89718872	9.900318706	0.150238863	380	406	0	32	8	1	67	71	P_granule_transcripts	NA
WBGene00011409	T04A8.7	T04A8.7	30.72642415	16.80287856	0.546854345	380	118	1	11	4	0	67	533	P_granule_transcripts	NA
WBGene00001005	T26A5.9	dlc-1	170.0042291	351.1876572	2.065758358	368	285	0	65	13	1	69	137	P_granule_transcripts	NA
WBGene00002148	F44C4.4	gon-14	134.1185529	125.0369574	0.932286807	368	404	1	46	14	2	69	72	P_granule_transcripts	NA
WBGene00003228	W03C9.7	mex-1	130.560664	170.0150405	1.302191911	368	313	1	22	17	0	69	118	P_granule_transcripts	NA
WBGene00012929	Y47D3A.16	rsks-1	243.8009963	226.9782472	0.93099803	364	309	2	45	18	7	72	123	P_granule_transcripts	NA
WBGene00003229	F53G12.5	mex-3	240.5192244	339.3458131	1.410888522	363	403	48	27	69	3	73	73	P_granule_transcripts	NA
WBGene00002010	C37H5.8	hsp-6	208.1354967	188.6952781	0.906598255	358	260	1	35	36	0	74	162	P_granule_transcripts	NA
WBGene00004274	F53G12.1	rab-11.1	265.048377	360.7332632	1.361009138	356	427	1	86	60	0	75	69	P_granule_transcripts	NA
WBGene00006499	F44A2.1	tag-153	138.1140874	105.4802529	0.763718277	350	80	0	13	4	7	76	854	P_granule_transcripts	NA
WBGene00013340	Y59A8A.3	tcc-1	108.1344296	16.52451082	0.152814519	349	311	3	25	3	17	77	119	P_granule_transcripts	NA
WBGene00019608	K10B2.5	ani-2	58.95390111	34.43260339	0.584059795	347	483	3	55	19	1	78	55	P_granule_transcripts	NA
WBGene00001607	C28D4.3	gln-6	204.7163955	110.8204588	0.541336509	343	232	0	31	1	0	79	188	P_granule_transcripts	NA
WBGene00009661	F43G6.9	patr-1	917.2353438	807.2461024	0.880086128	339	343	108	51	49	3	80	100	P_granule_transcripts	NA
WBGene00019295	K02B2.1	pfkb-1.2	155.3772544	193.9642192	1.248343716	337	132	10	25	6	0	81	449	P_granule_transcripts	NA
WBGene00015102	B0280.5	cpg-2	86.2100798	3.92083354	0.04547999	336	296	2	54	7	0	83	132	P_granule_transcripts	NA
WBGene00014015	ZK632.7	panl-3	220.0402014	243.5996964	1.107069049	335	117	6	21	11	0	84	543	P_granule_transcripts	NA
WBGene00020762	T24C4.6	zer-1	162.7936916	144.0784701	0.885037182	334	330	0	45	7	0	85	105	P_granule_transcripts	NA
WBGene00006773	W02D3.9	unc-37	873.6001662	1421.261555	1.626901653	332	189	1	33	13	4	86	265	P_granule_transcripts	NA
WBGene00001744	T10F2.1	gars-1	139.6380479	118.0393403	0.845323621	330	145	80	20	2	0	87	395	P_granule_transcripts	NA
WBGene00010199	F57C7.1	bet-2	727.9144048	773.1508838	1.062145327	327	132	0	43	17	7	88	449	P_granule_transcripts	NA
WBGene00007332	C05C10.5	C05C10.5	187.8617516	306.6179899	1.632146977	326	144	18	28	74	3	89	401	P_granule_transcripts	NA
WBGene00018152	F37C12.7	acs-4	119.2478022	92.87544838	0.77884411	324	393	139	60	8	0	90	78	P_granule_transcripts	PGL-1_bound
WBGene00004392	C03C10.3	rnr-2	1918.152259	3241.853443	1.69009182	322	246	26	71	20	8	91	174	P_granule_transcripts	NA
WBGene00007023	T18H9.6	mdt-27	49.32225093	32.86118717	0.666254815	322	108	30	13	3	0	91	609	P_granule_transcripts	NA
WBGene00017217	F07F6.4	F07F6.4	124.0687675	236.5019405	1.90621657	320	314	8	28	24	2	93	115	P_granule_transcripts	NA
WBGene00002251	B0457.1	lat-1	127.8686012	29.39583058	0.229890922	317	177	2	81	53	2	94	292	P_granule_transcripts	NA
WBGene00000381	F01F1.8	cct-6	171.6498972	167.529995	0.975998225	312	141	1	24	3	0	95	415	P_granule_transcripts	NA
WBGene00008052	C41C4.7	ctns-1	14.88993433	0.634904515	0.042639847	312	133	1	17	7	0	95	445	P_granule_transcripts	NA
WBGene00011505	T05G11.1	pzf-1	8.558807018	0.404994623	0.047319051	310	131	4	9	3	0	97	457	P_granule_transcripts	NA
WBGene00001499	C26E6.5	fsn-1	94.53744193	29.71489135	0.314318758	308	69	0	33	6	2	98	997	P_granule_transcripts	NA
WBGene00011061	R06C7.1	wago-1	426.1652929	357.9443117	0.839918965	307	452	41	74	29	1	99	60	P_granule_transcripts	NA
WBGene00012716	Y39E4B.5	Y39E4B.5	20.25380079	5.534415274	0.27325317	307	136	3	11	5	0	99	435	P_granule_transcripts	NA
WBGene00013038	Y49E10.19	ani-1	791.2538243	936.2817269	1.183288723	305	93	1	23	1	0	101	719	P_granule_transcripts	NA
WBGene00020549	T17E9.2	nmt-1	129.7335908	195.3492334	1.505772192	302	126	0	11	8	1	102	492	P_granule_transcripts	NA
WBGene00004239	Y45F10A.2	puf-3	33.41804346	4.933984492	0.147644326	301	396	3	73	17	0	103	77	P_granule_transcripts	NA
WBGene00016318	C32D5.11	C32D5.11	123.8738968	83.86623157	0.67702909	301	155	0	5	6	8	103	357	P_granule_transcripts	NA
WBGene00008780	F14B4.2	F14B4.2	102.9882637	60.0015054	0.582605272	299	452	112	49	21	5	105	60	P_granule_transcripts	NA
WBGene00008948	F19B6.1	F19B6.1	246.4253961	188.1932927	0.763692767	297	138	0	12	22	2	107	425	P_granule_transcripts	NA
WBGene00000064	T04C12.5	act-2	741.3204974	1826.934416	2.464432621	296	299	1	55	8	3	108	130	P_granule_transcripts	NA
WBGene00004336	W06A7.3	ret-1	150.6295237	370.9833747	2.462886196	295	561	130	67	35	5	109	39	P_granule_transcripts	PGL-1_bound
WBGene00010405	H19N07.1	erfa-3	206.0085111	247.5926359	1.201856344	295	152	0	50	18	0	109	365	P_granule_transcripts	NA
WBGene00004132	F56F3.1	ifet-1	733.1419733	1141.966652	1.55763371	293	473	30	133	95	1	112	57	P_granule_transcripts	NA
WBGene00003784	ZK1127.1	nos-2	59.58117489	23.92310344	0.401521177	292	289	1	21	25	0	113	135	P_granule_transcripts	NA
WBGene00020091	R119.7	rnp-8	33.00845002	27.3927222	0.829869993	292	158	0	25	7	0	113	343	P_granule_transcripts	NA
WBGene00004204	F01G4.1	swsn-4	1589.389644	1336.438633	0.840850221	288	103	0	50	7	6	116	640	P_granule_transcripts	NA
WBGene00011324	T01C3.9	T01C3.9	28.6233522	17.57292544	0.613936667	287	131	26	7	8	1	117	457	P_granule_transcripts	NA
WBGene00020679	T22B11.5	ogdh-1	108.4918256	55.08690966	0.507751707	287	249	0	29	5	0	117	171	P_granule_transcripts	NA
WBGene00004214	F59G1.5	ptp-2	95.26262196	52.35032094	0.549536847	281	96	1	11	15	2	119	702	P_granule_transcripts	NA
WBGene00020437	T12A2.2	stt-3	263.5392453	79.67198656	0.302315454	281	174	0	72	18	0	119	305	P_granule_transcripts	NA
WBGene00004075	Y76A2B.1	pod-1	310.3704849	339.0824502	1.092508685	278	330	126	91	34	0	121	105	P_granule_transcripts	PGL-1_bound
WBGene00001023	C04A2.7	dnj-5	310.882202	134.7653861	0.433493411	277	349	1	59	29	2	122	98	P_granule_transcripts	NA
WBGene00002045	C56C10.8	icd-1	422.0666961	224.2480187	0.531309437	277	108	4	20	1	6	122	609	P_granule_transcripts	NA
WBGene00009701	F44F4.2	egg-3	48.01429325	6.488695234	0.135140909	272	231	1	41	21	2	126	191	P_granule_transcripts	NA
WBGene00019893	R05F9.10	sgt-1	122.0185748	262.8080318	2.153836268	270	388	7	23	17	1	127	80	P_granule_transcripts	NA
WBGene00235159	CD4.17	CD4.17	0.01650662	311.2067446	18853.45004	269	330	0	153	1	6	128	105	P_granule_transcripts	NA
WBGene00010645	K07G5.6	fecl-1	32.44060561	15.84185261	0.488334059	268	64	1	3	5	0	129	1062	P_granule_transcripts	NA
WBGene00000800	Y23H5A.7	cars-1	208.6727193	128.7343336	0.616919806	267	82	0	13	8	0	131	837	P_granule_transcripts	NA
WBGene00007000	Y71H2AM.23	tufm-1	149.7131102	93.52990422	0.624727548	267	97	0	7	4	1	131	688	P_granule_transcripts	NA
WBGene00009975	F53C11.5	F53C11.5	77.81523857	69.00716601	0.886807871	265	137	0	22	5	2	133	428	P_granule_transcripts	NA
WBGene00012344	W08E3.3	ola-1	200.6378193	192.7522333	0.96069741	263	98	0	11	6	1	134	679	P_granule_transcripts	NA
WBGene00002202	C03C10.1	kin-19	339.5833948	377.7185372	1.112299785	258	82	0	66	51	34	136	837	P_granule_transcripts	NA
WBGene00014096	ZK829.7	ZK829.7	77.17182657	49.63499408	0.643175059	256	93	0	19	6	0	137	719	P_granule_transcripts	NA
WBGene00007681	C18D11.3	C18D11.3	42.46849003	22.11594711	0.520761324	252	210	42	53	0	0	139	219	P_granule_transcripts	NA
WBGene00000192	Y57G11C.13	arl-8	63.23738591	70.86566525	1.120629264	251	296	12	13	16	1	140	132	P_granule_transcripts	NA
WBGene00007267	C03A3.2	C03A3.2	6.810438522	3.290882564	0.483211551	250	103	0	4	2	1	141	640	P_granule_transcripts	NA
WBGene00019606	K10B2.3	clec-88	189.1027425	92.1610166	0.487359492	249	327	3	51	16	1	142	108	P_granule_transcripts	NA
WBGene00007297	C04F12.1	C04F12.1	27.05927257	23.32107711	0.861851591	248	130	2	11	0	0	143	466	P_granule_transcripts	NA
WBGene00012471	Y17G7B.20	Y17G7B.20	268.0903608	251.0628484	0.936485921	248	154	8	86	29	4	143	361	P_granule_transcripts	NA
WBGene00012908	Y46G5A.18	Y46G5A.18	123.7542247	136.3620454	1.101877901	248	101	0	32	0	4	143	654	P_granule_transcripts	NA
WBGene00009159	F26E4.4	F26E4.4	103.0078107	62.23324553	0.604160453	247	103	3	12	0	0	146	640	P_granule_transcripts	NA
WBGene00012481	Y18D10A.11	Y18D10A.11	48.66972648	16.92149722	0.347680138	247	141	78	20	23	1	146	415	P_granule_transcripts	NA
WBGene00015677	C10F3.1	cpg-4	26.09605848	0.539505866	0.020673845	247	80	0	25	7	9	146	854	P_granule_transcripts	NA
WBGene00000567	ZK632.6	cnx-1	162.2330427	63.10385796	0.38897044	245	100	0	36	0	0	149	662	P_granule_transcripts	NA
WBGene00000379	K01C8.10	cct-4	205.8598277	199.7702313	0.970418724	244	145	0	11	0	0	150	395	P_granule_transcripts	NA
WBGene00002083	F57B9.6	inf-1	610.710471	1315.346708	2.153797537	244	429	4	66	103	4	150	67	P_granule_transcripts	NA
WBGene00001329	T04C10.2	epn-1	304.2999325	449.9897531	1.478770466	242	311	31	27	20	19	153	119	P_granule_transcripts	NA
WBGene00003827	C49H3.5	ntl-4	222.9962338	303.1241224	1.359323954	242	172	1	27	8	24	153	311	P_granule_transcripts	NA
WBGene00006607	F57B10.7	tre-1	31.04475213	6.457031593	0.207991082	241	142	0	41	13	11	155	412	P_granule_transcripts	NA
WBGene00008385	D1081.7	D1081.7	73.38355183	46.24233123	0.630145722	240	507	0	55	7	0	156	52	P_granule_transcripts	NA
WBGene00011898	T21C9.13	T21C9.13	42.75603607	37.92447574	0.886997	239	67	135	12	50	1	157	1025	P_granule_transcripts	NA
WBGene00001580	F28D1.10	gex-3	121.4395906	87.64296424	0.721700097	238	97	0	21	6	1	158	688	P_granule_transcripts	NA
WBGene00002238	T02G5.9	kars-1	228.7504088	159.8542688	0.698815227	238	167	0	54	13	0	158	318	P_granule_transcripts	NA
WBGene00004304	C26D10.1	ran-3	241.3761078	224.7981419	0.931318945	238	196	60	55	55	4	158	250	P_granule_transcripts	NA
WBGene00001595	T23G11.3	gld-1	118.5158355	69.59527042	0.587223388	237	644	1	48	38	0	161	30	P_granule_transcripts	NA
WBGene00011729	T12D8.1	set-16	616.9863242	357.0220787	0.578654769	237	146	0	67	0	12	161	390	P_granule_transcripts	NA
WBGene00002073	F26B1.3	ima-2	169.7665289	33.83395523	0.199296972	236	326	0	22	29	1	164	109	P_granule_transcripts	NA
WBGene00004034	F09E5.1	pkc-3	163.117516	151.8817753	0.931118736	236	120	0	19	6	0	164	522	P_granule_transcripts	NA
WBGene00010478	K01G5.5	K01G5.5	688.1425025	504.7447202	0.733488657	236	116	0	35	12	0	164	547	P_granule_transcripts	NA
WBGene00012907	Y46G5A.17	cpt-1	261.0233412	96.9960488	0.371599139	235	144	39	63	13	12	168	401	P_granule_transcripts	NA
WBGene00015734	C13B9.3	copd-1	165.2032679	187.6286706	1.135744304	235	202	20	56	11	0	168	231	P_granule_transcripts	NA
WBGene00003231	AH6.5	mex-6	146.7507647	182.8842715	1.246223636	234	913	1	50	23	1	171	9	P_granule_transcripts	NA
WBGene00018421	F44E2.8	F44E2.8	105.0615101	150.6225444	1.43366057	234	84	14	32	5	0	171	813	P_granule_transcripts	NA
WBGene00020695	T22F3.2	T22F3.2	48.01957328	43.60707425	0.908110407	234	214	3	11	4	6	171	216	P_granule_transcripts	NA
WBGene00015746	C13F10.7	C13F10.7	130.5157119	132.1920683	1.012844096	233	98	6	13	13	0	174	679	P_granule_transcripts	NA
WBGene00006776	T19B4.7	unc-40	140.2263734	30.39547091	0.216760016	230	308	19	46	13	1	177	124	P_granule_transcripts	NA
WBGene00019504	K07H8.2	K07H8.2	43.74567754	7.426762646	0.169771348	230	266	1	33	26	2	177	150	P_granule_transcripts	NA
WBGene00000231	D2045.1	atx-2	458.5085009	792.388575	1.728187315	229	186	1	108	7	2	179	271	P_granule_transcripts	NA
WBGene00021934	Y55F3AR.3	cct-8	172.8101781	237.2076749	1.37264875	229	389	0	42	7	0	179	79	P_granule_transcripts	NA
WBGene00007580	C14B1.9	C14B1.9	25.40528923	1.188459073	0.046779986	228	263	0	9	13	1	181	159	P_granule_transcripts	NA
WBGene00003793	T19B4.2	npp-7	357.6645117	467.1824641	1.306203017	227	310	50	47	35	3	182	121	P_granule_transcripts	NA
WBGene00003830	T03D8.1	num-1	63.86591167	97.19208523	1.521814732	227	107	0	33	30	1	182	618	P_granule_transcripts	NA
WBGene00009126	F25H5.3	pyk-1	90.87201573	58.96858093	0.648919037	227	516	80	77	32	0	182	49	P_granule_transcripts	PGL-1_bound
WBGene00004187	C50C3.6	prp-8	1710.117886	1042.387301	0.609541196	226	264	0	143	19	3	185	155	P_granule_transcripts	NA
WBGene00008053	C41C4.8	cdc-48.2	35.56691717	20.31274886	0.571113565	226	151	1	43	2	2	185	371	P_granule_transcripts	NA
WBGene00012550	Y37D8A.10	hpo-21	110.1095042	96.35670915	0.875098929	226	61	0	10	2	0	185	1104	P_granule_transcripts	NA
WBGene00003086	Y37A1B.2	lst-4	79.70206184	65.50700334	0.821898478	225	69	0	46	5	0	188	997	P_granule_transcripts	NA
WBGene00004266	C39F7.4	rab-1	140.6331702	276.0535832	1.962933658	225	124	0	19	1	22	188	503	P_granule_transcripts	NA
WBGene00018613	F48E8.7	skpt-1	50.79289608	45.45685976	0.894945224	225	117	0	4	2	0	188	543	P_granule_transcripts	NA
WBGene00011638	T09A5.11	ostb-1	183.061504	155.9618581	0.851964256	224	90	3	36	21	5	191	745	P_granule_transcripts	NA
WBGene00000472	F33A8.3	cey-1	371.1744797	562.918895	1.516588359	223	166	0	78	10	20	192	320	P_granule_transcripts	NA
WBGene00003818	H15N14.2	nsf-1	156.8910505	197.9474537	1.261687349	223	141	0	55	14	1	192	415	P_granule_transcripts	NA
WBGene00009050	F22D6.2	F22D6.2	302.7437085	534.0290852	1.763964272	223	272	0	67	14	1	192	143	P_granule_transcripts	NA
WBGene00001574	W10D5.3	gei-17	22.98252784	91.21343495	3.968816467	222	139	0	35	5	4	195	420	P_granule_transcripts	NA
WBGene00002066	M110.4	ifg-1	679.7841525	1344.694459	1.978119751	222	469	1	73	25	5	195	58	P_granule_transcripts	NA
WBGene00012762	Y41E3.1	Y41E3.1	26.58393793	11.7370661	0.441509687	222	107	1	13	5	26	195	618	P_granule_transcripts	NA
WBGene00000465	C07G2.1	cpg-1	264.5950479	3.060326438	0.011566076	221	361	3	34	3	0	198	90	P_granule_transcripts	NA
WBGene00019989	R09F10.8	R09F10.8	52.19065274	21.11002446	0.404479027	221	103	9	18	0	0	198	640	P_granule_transcripts	NA
WBGene00009272	F30F8.3	gras-1	30.01169322	15.65471815	0.521620624	220	123	0	6	9	0	200	508	P_granule_transcripts	NA
WBGene00016311	C32D5.3	C32D5.3	61.60239253	29.36133565	0.476626547	219	103	3	6	12	1	202	640	P_granule_transcripts	NA
WBGene00022702	ZK353.7	cutc-1	51.35295508	37.0200674	0.720894588	219	244	0	9	16	0	202	175	P_granule_transcripts	NA
WBGene00011464	T05B9.1	T05B9.1	197.050338	235.8458973	1.196881466	218	156	2	21	12	1	204	353	P_granule_transcripts	NA
WBGene00004201	F54F2.8	prx-19	80.079755	91.26409548	1.139665019	217	93	1	3	10	2	205	719	P_granule_transcripts	NA
WBGene00019900	R05G6.7	vdac-1	394.4247205	905.8726779	2.296693465	216	78	2	48	3	0	206	878	P_granule_transcripts	NA
WBGene00000377	T05C12.7	cct-1	371.6083765	257.7344163	0.693564603	215	228	0	111	2	0	207	195	P_granule_transcripts	NA
WBGene00016163	C27D9.1	C27D9.1	8.291904115	1.753085571	0.211421351	215	127	1	17	3	0	207	486	P_granule_transcripts	NA
WBGene00020068	R13F6.10	cra-1	64.17821161	41.76714536	0.650799458	215	177	0	25	3	22	207	292	P_granule_transcripts	NA
WBGene00021420	Y38F2AR.2	trap-3	97.76478882	214.3928277	2.192945234	215	76	53	21	1	1	207	906	P_granule_transcripts	NA
WBGene00001978	R13H4.4	hmp-1	269.9851968	231.2693364	0.856600062	214	153	0	33	4	0	213	363	P_granule_transcripts	NA
WBGene00011115	R07E5.7	R07E5.7	71.78005066	51.78425395	0.72142961	214	64	3	7	6	0	213	1062	P_granule_transcripts	NA
WBGene00011945	T23D8.7	hpo-24	58.25326922	17.91218962	0.307488144	213	144	104	13	10	27	216	401	P_granule_transcripts	NA
WBGene00001168	F31E3.5	eef-1A.1	5243.773253	2117.558165	0.403823366	212	369	2	185	6	6	219	88	P_granule_transcripts	NA
WBGene00004378	F18C12.2	rme-8	145.0053085	60.27391161	0.415666931	211	209	4	37	2	28	220	220	P_granule_transcripts	NA
WBGene00022114	Y71F9AL.9	Y71F9AL.9	360.3122718	630.1750493	1.748969154	211	422	14	71	28	2	220	70	P_granule_transcripts	NA
WBGene00006523	F26G5.9	tam-1	616.3782749	379.1256	0.615085923	208	188	50	58	19	0	224	268	P_granule_transcripts	NA
WBGene00022775	ZK616.5	ZK616.5	10.80792661	3.331234425	0.308221414	208	121	2	8	3	0	224	517	P_granule_transcripts	NA
WBGene00003010	B0001.1	lin-24	34.21990254	21.04739662	0.615063021	206	127	0	6	5	0	227	486	P_granule_transcripts	NA
WBGene00002136	F07A5.1	inx-14	24.86601982	6.761822044	0.271930212	205	129	2	10	9	3	228	475	P_granule_transcripts	NA
WBGene00003136	C09H6.3	mau-2	50.53528161	61.94709022	1.225818641	205	68	0	2	4	0	228	1015	P_granule_transcripts	NA
WBGene00004760	F10F2.1	sel-2	480.1378164	276.5688481	0.576019715	205	94	3	34	7	15	228	713	P_granule_transcripts	NA
WBGene00021596	Y46E12BL.3	spsb-2	23.63609441	6.682359351	0.282718424	205	180	2	16	11	56	228	285	P_granule_transcripts	NA
WBGene00011980	T24B8.7	T24B8.7	593.8997046	277.5474399	0.46733049	204	273	1	112	6	36	233	142	P_granule_transcripts	NA
WBGene00003920	M117.2	par-5	676.2145554	838.2682701	1.239648368	203	259	109	32	19	11	234	163	P_granule_transcripts	NA
WBGene00003962	C14B1.1	pdi-1	369.1857709	159.2513944	0.43135843	203	177	15	78	37	3	234	292	P_granule_transcripts	NA
WBGene00004243	B0273.2	puf-7	14.66921423	6.963376605	0.474693224	201	238	0	38	2	0	236	178	P_granule_transcripts	NA
WBGene00007385	C06H2.1	atp-5	254.5579538	224.3057885	0.881158043	201	81	2	23	0	8	236	846	P_granule_transcripts	NA
WBGene00003162	F20H11.3	mdh-2	44.20343845	98.83650351	2.235946048	200	147	0	32	5	15	238	385	P_granule_transcripts	NA
WBGene00007696	C24F3.1	tram-1	69.56185026	64.02171333	0.920356677	199	92	1	43	12	0	242	734	P_granule_transcripts	NA
WBGene00000380	C07G2.3	cct-5	386.0675096	156.4119966	0.405141569	198	186	0	31	2	0	243	271	P_granule_transcripts	NA
WBGene00010097	F55C5.8	srpa-68	236.4611513	270.7789268	1.145130713	198	108	0	42	7	0	243	609	P_granule_transcripts	NA
WBGene00020481	T13C2.6	T13C2.6	78.36745377	19.06373275	0.243260841	198	532	1	65	22	0	243	46	P_granule_transcripts	NA
WBGene00001994	F20B6.8	hpk-1	182.7893579	148.0093313	0.809726195	197	307	1	87	11	6	249	125	P_granule_transcripts	NA
WBGene00006833	F53F10.4	unc-108	142.9134657	202.6642747	1.418090826	197	109	0	39	6	3	249	597	P_granule_transcripts	NA
WBGene00010198	F57C2.6	spat-1	100.6623839	99.40218578	0.987480943	197	71	1	29	6	2	249	969	P_granule_transcripts	NA
WBGene00020719	T23B12.4	T23B12.4	83.6074035	62.84238044	0.751636551	194	105	1	14	8	0	253	628	P_granule_transcripts	NA
WBGene00002263	K08H10.1	lea-1	213.0926823	480.3404137	2.254138474	193	232	0	14	9	0	256	188	P_granule_transcripts	NA
WBGene00015095	B0261.7	B0261.7	82.09684967	64.54597029	0.786217383	193	136	0	8	1	0	256	435	P_granule_transcripts	NA
WBGene00022393	Y97E10AL.2	Y97E10AL.2	62.53785773	8.446331555	0.135059496	193	78	0	14	0	0	256	878	P_granule_transcripts	NA
WBGene00001094	B0464.1	dars-1	212.1572417	198.5893825	0.936048098	192	80	1	19	4	0	259	854	P_granule_transcripts	NA
WBGene00018294	F41E6.13	atg-18	206.7189418	323.6401201	1.56560457	192	149	64	64	14	10	259	380	P_granule_transcripts	PGL-1_bound
WBGene00021534	Y42G9A.4	mvk-1	203.3090465	184.250239	0.906256963	192	98	1	46	19	9	259	679	P_granule_transcripts	NA
WBGene00018948	F56C9.3	F56C9.3	31.08197611	13.73104046	0.44176858	191	189	52	32	11	0	262	265	P_granule_transcripts	NA
WBGene00002008	F43E2.8	hsp-4	238.9757816	143.54979	0.600687605	190	95	2	13	4	0	264	705	P_granule_transcripts	NA
WBGene00020031	R12E2.2	R12E2.2	45.18933813	6.762413313	0.149646213	190	303	1	18	7	0	264	127	P_granule_transcripts	NA
WBGene00008410	D2023.6	D2023.6	16.65533017	2.120371763	0.1273089	189	223	0	32	3	0	269	204	P_granule_transcripts	NA
WBGene00006352	F26E4.1	sur-6	292.539606	381.6025485	1.304447469	188	134	25	35	17	0	270	442	P_granule_transcripts	NA
WBGene00020375	T09B4.1	pigv-1	174.628348	123.9432977	0.70975474	187	85	8	36	35	0	272	803	P_granule_transcripts	NA
WBGene00004373	W06H8.1	rme-1	138.1286468	130.5182576	0.944903614	186	70	17	16	0	0	276	983	P_granule_transcripts	NA
WBGene00006975	F54F2.2	zfp-1	326.9460256	343.8296752	1.05164048	185	271	0	48	13	6	279	145	P_granule_transcripts	NA
WBGene00008218	C50B6.2	nasp-2	2441.595993	5059.220562	2.072095701	185	113	4	34	6	0	279	558	P_granule_transcripts	NA
WBGene00009772	F46B6.7	ztf-7	357.0850117	143.9591876	0.403151022	185	475	0	108	13	0	279	56	P_granule_transcripts	NA
WBGene00006443	C45B11.1	pak-2	86.76970325	30.03992154	0.346202884	184	64	1	18	3	0	282	1062	P_granule_transcripts	NA
WBGene00007290	C04B4.2	C04B4.2	28.39673388	1.349495112	0.047522899	183	92	39	20	15	2	283	734	P_granule_transcripts	NA
WBGene00011501	T05G5.7	rmd-1	113.7788591	50.61680057	0.444869996	183	170	1	13	3	0	283	313	P_granule_transcripts	NA
WBGene00017984	F32D1.5	F32D1.5	1046.115994	690.6607099	0.660214273	183	91	1	30	68	3	283	741	P_granule_transcripts	NA
WBGene00001813	F57A10.3	haf-3	51.38302212	39.90441907	0.776607086	182	85	9	21	2	1	287	803	P_granule_transcripts	NA
WBGene00008330	C55A6.1	C55A6.1	64.28387176	42.015179	0.653588184	182	141	1	8	9	0	287	415	P_granule_transcripts	NA
WBGene00013578	Y76A2B.6	scav-2	22.05143253	4.061704249	0.184192308	182	76	0	18	9	0	287	906	P_granule_transcripts	NA
WBGene00017547	F18A1.6	alfa-1	68.21549339	44.24207534	0.648563444	182	74	0	27	2	0	287	931	P_granule_transcripts	NA
WBGene00004143	R119.4	pqn-59	991.2275892	1600.976212	1.615144927	181	533	1	63	1	0	293	45	P_granule_transcripts	NA
WBGene00021952	Y55H10A.1	vha-19	55.00045502	51.45265131	0.935495012	181	84	1	35	6	0	293	813	P_granule_transcripts	NA
WBGene00008848	F15B9.4	inft-2	84.88037513	58.60035071	0.690387509	180	94	40	20	5	0	295	713	P_granule_transcripts	NA
WBGene00018701	F52E4.1	pccb-1	454.6227141	616.4772117	1.356019382	180	71	0	27	6	0	295	969	P_granule_transcripts	NA
WBGene00020824	T26A8.1	T26A8.1	48.73102171	11.57900329	0.237610518	180	115	0	30	12	1	295	549	P_granule_transcripts	NA
WBGene00000378	T21B10.7	cct-2	192.3900197	192.3187923	0.999629776	179	97	0	38	6	13	298	688	P_granule_transcripts	NA
WBGene00011481	T05E11.5	imp-2	135.4917158	62.40100163	0.460552154	179	289	0	47	11	3	298	135	P_granule_transcripts	NA
WBGene00018959	F56D1.1	F56D1.1	32.40572957	6.011480366	0.185506713	178	126	2	11	6	0	302	492	P_granule_transcripts	NA
WBGene00001510	ZK1307.6	fzr-1	232.6716851	319.1298	1.371588468	176	199	1	39	16	5	304	238	P_granule_transcripts	NA
WBGene00022425	Y104H12BR.1	plst-1	41.06815478	48.08677394	1.170901741	174	175	75	26	19	2	308	302	P_granule_transcripts	NA
WBGene00004148	T13H2.4	pqn-65	544.6375409	470.6232751	0.864103628	173	99	3	45	2	0	309	671	P_granule_transcripts	NA
WBGene00007860	C32A3.3	rilp-1	24.19336206	13.58292201	0.561431767	173	130	0	21	13	0	309	466	P_granule_transcripts	NA
WBGene00010428	H38K22.2	dcn-1	163.399109	344.2159864	2.106596471	173	122	0	13	6	0	309	514	P_granule_transcripts	NA
WBGene00004095	F52C9.8	pqe-1	418.1427165	495.9593831	1.186100734	172	98	0	55	10	16	312	679	P_granule_transcripts	NA
WBGene00011680	T10B10.3	T10B10.3	167.7683958	150.9250876	0.899603808	171	83	2	12	2	0	315	825	P_granule_transcripts	NA
WBGene00016139	C26E6.3	ntl-9	96.72051338	167.428631	1.731056062	171	113	33	21	26	0	315	558	P_granule_transcripts	NA
WBGene00021857	Y54F10BM.2	iffb-1	121.251685	206.6532204	1.704332773	171	71	0	9	7	0	315	969	P_granule_transcripts	NA
WBGene00019124	F59E12.9	F59E12.9	127.0272688	147.8959186	1.164284803	170	265	0	16	4	6	319	153	P_granule_transcripts	NA
WBGene00000387	F16B4.8	cdc-25.2	346.4110091	416.6423332	1.202739873	169	77	16	37	20	1	323	893	P_granule_transcripts	NA
WBGene00018963	F56D2.1	ucr-1	247.2035642	192.2152876	0.777558723	169	192	53	25	2	1	323	260	P_granule_transcripts	NA
WBGene00000301	T13F2.8	cav-1	3247.94846	4208.933288	1.295874408	168	65	5	66	16	5	326	1050	P_granule_transcripts	NA
WBGene00006996	C08B11.1	zyg-11	150.5764396	80.8483963	0.536925939	168	534	53	100	50	2	326	44	P_granule_transcripts	NA
WBGene00007024	W01A8.1	mdt-28	111.9423667	182.8041913	1.633020605	168	197	0	7	9	0	326	244	P_granule_transcripts	NA
WBGene00017245	F08D12.1	F08D12.1	157.4454086	165.0599979	1.048363362	168	181	0	42	12	5	326	283	P_granule_transcripts	NA
WBGene00020036	R12E2.11	R12E2.11	32.07688493	61.51268631	1.917663964	168	60	0	7	7	1	326	1113	P_granule_transcripts	NA
WBGene00020347	T08B2.7	T08B2.7	312.1353159	243.4679148	0.780007588	168	178	2	31	6	0	326	290	P_granule_transcripts	NA
WBGene00003918	F54E7.3	par-3	311.1652795	198.6694214	0.638469118	167	138	0	23	9	7	338	425	P_granule_transcripts	NA
WBGene00011232	R11A5.4	pck-2	793.8553254	795.411281	1.001959999	167	96	23	31	11	18	338	702	P_granule_transcripts	NA
WBGene00022452	Y110A2AR.1	Y110A2AR.1	40.56256303	6.131021852	0.151149765	167	123	2	15	2	2	338	508	P_granule_transcripts	NA
WBGene00003656	T09A12.4	nhr-66	44.16674959	19.55395747	0.442730281	166	219	67	28	14	23	342	207	P_granule_transcripts	NA
WBGene00004755	F12F6.6	sec-24.1	234.327133	299.6802414	1.278896889	166	189	58	41	6	0	342	265	P_granule_transcripts	NA
WBGene00013803	Y116A8C.26	snx-13	44.06984425	6.06965192	0.137728009	166	89	12	15	7	6	342	760	P_granule_transcripts	NA
WBGene00001597	T07F8.3	gld-3	195.4001767	288.912115	1.478566294	164	361	0	38	15	0	347	90	P_granule_transcripts	NA
WBGene00004206	M03F8.2	pst-1	11.65999934	8.091151825	0.693923866	164	159	0	4	3	1	347	338	P_granule_transcripts	NA
WBGene00010685	K08F9.2	aipl-1	320.0753718	231.8860925	0.724473399	164	88	10	9	14	0	347	769	P_granule_transcripts	NA
WBGene00003230	W02A2.7	mex-5	227.7172027	311.9285141	1.369806543	163	836	82	101	113	26	351	13	P_granule_transcripts	PGL-1_bound
WBGene00016170	C27F2.8	C27F2.8	160.6811928	38.15394317	0.237451207	163	434	3	56	2	4	351	66	P_granule_transcripts	NA
WBGene00021292	Y25C1A.5	copb-1	223.1837908	250.4918086	1.122356636	163	369	0	43	5	5	351	88	P_granule_transcripts	NA
WBGene00006715	F40G9.3	ubc-20	62.8217727	105.5413976	1.680013045	162	70	1	8	14	1	354	983	P_granule_transcripts	NA
WBGene00013597	Y87G2A.8	gpi-1	77.891684	92.95615683	1.193402839	162	192	105	19	3	1	354	260	P_granule_transcripts	NA
WBGene00021636	Y47G6A.6	pcaf-1	124.6023892	158.431937	1.271499993	162	76	0	17	3	0	354	906	P_granule_transcripts	NA
WBGene00011507	T05H10.1	T05H10.1	63.9908048	34.9289738	0.54584364	161	190	19	28	21	0	360	263	P_granule_transcripts	NA
WBGene00018819	F54D12.6	rog-1	10.2822389	4.799473249	0.46677317	161	101	1	13	4	0	360	654	P_granule_transcripts	NA
WBGene00022138	Y71G12A.2	trpp-10	26.25100302	17.24330783	0.656862818	161	62	0	5	3	0	360	1090	P_granule_transcripts	NA
WBGene00014151	ZK930.1	vps-15	177.6226418	125.9431849	0.70904916	160	266	24	39	2	1	365	150	P_granule_transcripts	NA
WBGene00008136	C47D12.2	C47D12.2	121.4866368	84.00011091	0.691434985	159	197	0	30	11	1	367	244	P_granule_transcripts	NA
WBGene00022048	Y66H1B.2	fln-1	155.4110099	134.6991071	0.866728215	159	150	1	39	2	0	367	375	P_granule_transcripts	NA
WBGene00000552	T21H3.3	cmd-1	153.171535	278.7660194	1.819959691	158	114	11	82	19	27	370	554	P_granule_transcripts	NA
WBGene00004411	C42D4.8	rpc-1	195.9537167	122.3400842	0.624331532	158	106	2	17	4	0	370	623	P_granule_transcripts	NA
WBGene00010317	F59B8.2	idh-1	312.7655848	444.4998389	1.421191654	158	314	0	78	9	0	370	115	P_granule_transcripts	NA
WBGene00010631	K07C5.8	cash-1	261.1148313	141.5478514	0.542090431	158	118	9	77	14	2	370	533	P_granule_transcripts	NA
WBGene00012472	Y17G7B.21	Y17G7B.21	73.64794542	66.4805727	0.902680615	158	119	1	43	0	4	370	528	P_granule_transcripts	NA
WBGene00001855	C18G1.5	hil-4	172.422944	268.8467088	1.559228155	157	228	16	24	15	14	376	195	P_granule_transcripts	NA
WBGene00004782	C26E6.9	set-2	288.9000877	246.9755009	0.854882056	157	70	0	32	7	0	376	983	P_granule_transcripts	NA
WBGene00015504	C06A5.6	C06A5.6	22.48029718	9.261090004	0.41196475	156	108	0	14	6	0	378	609	P_granule_transcripts	NA
WBGene00021943	Y55F3BR.6	Y55F3BR.6	8.993055945	4.956130135	0.551106339	156	120	0	10	8	0	378	522	P_granule_transcripts	NA
WBGene00009113	F25D7.4	F25D7.4	9.173351647	4.593279825	0.500719912	155	71	0	6	3	0	381	969	P_granule_transcripts	NA
WBGene00011306	R186.3	R186.3	30.56319112	16.56202786	0.541894588	154	97	0	8	0	0	384	688	P_granule_transcripts	NA
WBGene00000865	ZC168.4	cyb-1	947.7958996	1858.742752	1.961121326	153	184	3	40	30	3	388	276	P_granule_transcripts	NA
WBGene00004242	F18A11.1	puf-6	24.32753897	10.03063258	0.41231596	153	262	0	8	9	1	388	160	P_granule_transcripts	NA
WBGene00007534	C12D8.1	C12D8.1	26.85733055	244.2336555	9.093742771	153	142	79	35	7	0	388	412	P_granule_transcripts	NA
WBGene00009435	F35G2.1	F35G2.1	24.1152604	10.83535616	0.449315329	153	356	11	30	16	4	388	96	P_granule_transcripts	NA
WBGene00018249	F40H3.1	F40H3.1	4.193567588	3.476557899	0.829021549	153	79	1	3	1	0	388	864	P_granule_transcripts	NA
WBGene00019693	M01A10.3	ostd-1	69.58300365	80.86806203	1.162181248	152	94	0	22	3	0	395	713	P_granule_transcripts	NA
WBGene00006562	K01C8.3	tdc-1	25.96387284	1.99260651	0.07674535	151	403	0	15	8	0	397	73	P_granule_transcripts	NA
WBGene00003083	T22A3.3	lst-1	122.0960279	141.8206414	1.161550001	150	164	0	19	15	2	399	324	P_granule_transcripts	NA
WBGene00006977	F59B2.6	zif-1	104.5464911	182.9529931	1.7499678	150	150	1	45	49	2	399	375	P_granule_transcripts	NA
WBGene00010056	F54D5.14	smc-6	191.9191273	124.5583366	0.649014709	150	119	1	18	8	0	399	528	P_granule_transcripts	NA
WBGene00018150	F37C12.2	epg-4	36.35695872	15.75771377	0.433416719	150	266	26	12	8	0	399	150	P_granule_transcripts	NA
WBGene00018925	F56A11.5	F56A11.5	23.004508	8.613262606	0.374416293	150	66	0	3	10	0	399	1036	P_granule_transcripts	NA
WBGene00001596	ZC308.1	gld-2	85.07992009	60.25100879	0.708169551	149	225	9	17	5	0	404	202	P_granule_transcripts	NA
WBGene00007705	C25A1.1	C25A1.1	129.1059608	280.4702926	2.172403898	149	71	0	11	19	1	404	969	P_granule_transcripts	NA
WBGene00004767	F55B12.3	sel-10	16.50981678	75.46148859	4.570704181	147	112	17	59	34	1	415	567	P_granule_transcripts	NA
WBGene00007588	C14C10.5	C14C10.5	309.1370448	262.5141757	0.849183817	147	69	7	57	3	4	415	997	P_granule_transcripts	NA
WBGene00008480	E04D5.1	E04D5.1	306.841943	170.7681249	0.556534492	147	283	226	40	89	7	415	139	P_granule_transcripts	NA
WBGene00011250	R11H6.2	R11H6.2	69.51106253	36.58952833	0.526384247	147	118	0	22	5	4	415	533	P_granule_transcripts	NA
WBGene00022832	ZK973.3	pdp-1	57.87569364	21.22390319	0.366715314	147	173	0	27	13	2	415	308	P_granule_transcripts	NA
WBGene00006936	Y87G2A.5	vars-2	104.2839626	91.79487959	0.880239658	146	113	16	26	11	0	422	558	P_granule_transcripts	NA
WBGene00000420	F56D2.7	ced-6	43.02267046	33.49381966	0.77851559	145	89	2	7	9	0	425	760	P_granule_transcripts	NA
WBGene00006460	F25D1.1	ppm-1	149.590315	120.1720117	0.803340856	145	231	1	26	34	29	425	191	P_granule_transcripts	NA
WBGene00006751	C32E8.10	unc-11	26.01039469	44.43634409	1.708407143	145	75	1	19	8	1	425	921	P_granule_transcripts	NA
WBGene00012528	Y32F6A.3	pap-1	257.204915	236.3573437	0.918945673	145	200	62	42	27	26	425	235	P_granule_transcripts	NA
WBGene00006794	C38C3.5	unc-60	246.2521888	581.9256966	2.363129032	144	510	17	66	48	4	433	50	P_granule_transcripts	NA
WBGene00022678	ZK180.4	sar-1	58.41109908	90.29186553	1.545799804	144	157	9	16	12	1	433	347	P_granule_transcripts	NA
WBGene00022703	ZK353.8	ubxn-4	138.2368836	240.4088289	1.739107702	144	191	0	10	2	1	433	262	P_granule_transcripts	NA
WBGene00003159	F32D1.10	mcm-7	2267.564079	3647.391233	1.608506356	143	400	16	77	46	1	438	75	P_granule_transcripts	NA
WBGene00004762	F35G12.3	sel-5	84.41304775	61.03626569	0.723066721	143	115	115	21	26	0	438	549	P_granule_transcripts	NA
WBGene00006593	C07F11.1	tol-1	104.6430247	21.67594246	0.207141781	143	285	0	51	30	4	438	137	P_granule_transcripts	NA
WBGene00009508	F37D6.2	F37D6.2	185.9684276	196.1398354	1.054694272	143	60	1	6	0	0	438	1113	P_granule_transcripts	NA
WBGene00015463	C05C8.6	hpo-9	97.10618298	35.34276481	0.363959984	143	196	0	58	2	1	438	250	P_granule_transcripts	NA
WBGene00000772	B0414.5	cpb-3	74.02645824	78.81190072	1.064645028	142	174	10	12	12	0	446	305	P_granule_transcripts	NA
WBGene00006902	F44F1.7	vet-6	603.8008305	1138.411589	1.885409114	142	87	0	16	0	0	446	781	P_granule_transcripts	NA
WBGene00022037	Y65B4BL.5	acs-13	178.8448705	140.6964244	0.78669533	142	255	0	76	18	2	446	166	P_granule_transcripts	NA
WBGene00007168	B0393.3	B0393.3	384.7093274	430.3132326	1.1185412	141	102	10	25	12	0	450	648	P_granule_transcripts	NA
WBGene00001971	Y48B6A.14	hmg-1.1	966.8885066	3409.430708	3.526188061	140	127	57	263	42	12	452	486	P_granule_transcripts	NA
WBGene00007428	C08B6.7	wdr-20	135.5278065	45.20785185	0.33356883	139	74	0	18	12	2	453	931	P_granule_transcripts	NA
WBGene00015146	B0336.6	abi-1	134.6429636	79.95047151	0.593796136	139	144	2	43	4	0	453	401	P_granule_transcripts	NA
WBGene00003927	CD4.6	pas-6	92.39674415	115.6765038	1.251954329	138	127	0	14	0	2	459	486	P_granule_transcripts	NA
WBGene00004042	C14B9.4	plk-1	524.3144945	558.7718444	1.065718858	138	69	1	40	10	9	459	997	P_granule_transcripts	NA
WBGene00004884	Y54F10AL.2	smg-6	210.5286736	197.9331826	0.940172088	138	77	0	21	4	0	459	893	P_granule_transcripts	NA
WBGene00001653	K04D7.5	gon-4	182.7519681	117.7330791	0.644223317	137	87	0	17	3	0	464	781	P_granule_transcripts	NA
WBGene00006406	F12F6.5	srgp-1	427.2444635	293.5632194	0.687108306	137	269	0	59	3	0	464	147	P_granule_transcripts	NA
WBGene00015928	C17H12.2	C17H12.2	55.08139042	11.06731645	0.200926599	137	100	4	12	6	1	464	662	P_granule_transcripts	NA
WBGene00007707	C25A1.5	C25A1.5	39.14540412	16.00525725	0.408866829	136	239	0	27	24	0	467	177	P_granule_transcripts	NA
WBGene00011488	T05F1.1	nra-2	109.9629914	51.05388326	0.464282415	136	207	0	21	4	0	467	224	P_granule_transcripts	NA
WBGene00021628	Y47D9A.1	Y47D9A.1	54.59346944	35.61374817	0.652344475	136	165	0	17	6	14	467	321	P_granule_transcripts	NA
WBGene00001579	F56A11.1	gex-2	208.950117	168.6719493	0.807235486	135	69	0	6	2	1	471	997	P_granule_transcripts	NA
WBGene00001933	F55G1.2	his-59	3435.040031	1912.445769	0.556746283	135	165	0	94	0	6	471	321	P_granule_transcripts	NA
WBGene00008975	F20D1.3	F20D1.3	56.66001947	119.5110478	2.109265915	135	86	2	16	1	1	471	793	P_granule_transcripts	NA
WBGene00010244	F58D5.5	F58D5.5	45.88829277	97.02704478	2.114418274	135	162	3	132	33	13	471	331	P_granule_transcripts	NA
WBGene00013994	ZK524.4	ZK524.4	107.3780738	136.2966538	1.269315504	135	78	1	15	25	5	471	878	P_granule_transcripts	NA
WBGene00009919	F52A8.6	F52A8.6	45.55888985	21.43092639	0.47040054	134	205	0	19	12	9	481	228	P_granule_transcripts	NA
WBGene00000390	R07G3.1	cdc-42	125.3624018	190.8107893	1.522073497	133	60	17	37	40	10	482	1113	P_granule_transcripts	NA
WBGene00000883	Y75B12B.2	cyn-7	449.0946357	355.3902775	0.791348302	133	235	1	39	2	0	482	183	P_granule_transcripts	NA
WBGene00002074	F32E10.4	ima-3	290.0390773	540.1085259	1.862192264	133	133	3	58	16	1	482	445	P_granule_transcripts	NA
WBGene00002245	K08B4.1	lag-1	174.3535408	222.9260768	1.278586461	133	151	0	31	24	0	482	371	P_granule_transcripts	NA
WBGene00011480	T05E11.3	enpl-1	414.7606394	146.7166263	0.353738066	133	550	0	66	10	0	482	42	P_granule_transcripts	NA
WBGene00020696	T22F3.3	T22F3.3	80.06039061	101.9418172	1.273311515	133	258	0	28	0	7	482	164	P_granule_transcripts	NA
WBGene00008505	F01G4.6	F01G4.6	324.5421219	209.140821	0.644418111	132	317	1	57	17	1	490	112	P_granule_transcripts	NA
WBGene00020683	T22D1.4	ribo-1	194.5596839	99.09389954	0.509323913	132	91	10	47	46	5	490	741	P_granule_transcripts	NA
WBGene00022122	Y71F9AM.6	trap-1	126.5827478	169.2493117	1.337064606	132	118	45	40	11	19	490	533	P_granule_transcripts	NA
WBGene00006994	F22B5.7	zyg-9	578.4963127	591.8489486	1.023081627	131	95	2	39	6	0	494	705	P_granule_transcripts	NA
WBGene00007709	C25A1.8	clec-87	628.8146945	700.2991288	1.11368124	131	359	1	79	43	1	494	94	P_granule_transcripts	NA
WBGene00001747	F29F11.6	gsp-1	218.8432371	335.1206974	1.531327638	130	136	0	41	21	1	499	435	P_granule_transcripts	NA
WBGene00002717	C01G8.9	let-526	951.1326412	860.5247629	0.904736864	130	157	0	75	6	12	499	347	P_granule_transcripts	NA
WBGene00006386	F30F8.8	taf-5	110.4838651	134.248111	1.215092457	130	108	0	7	1	1	499	609	P_granule_transcripts	NA
WBGene00013095	Y51H1A.4	ing-3	81.90017873	82.70277535	1.009799693	130	97	10	27	7	7	499	688	P_granule_transcripts	NA
WBGene00019259	H34C03.2	H34C03.2	265.7259029	272.9016285	1.027004238	130	103	17	22	47	4	499	640	P_granule_transcripts	NA
WBGene00006916	C26H9A.1	vha-7	22.10433917	9.776862519	0.442305126	129	99	4	17	15	0	507	671	P_granule_transcripts	NA
WBGene00007167	B0393.2	rbg-3	48.59700213	9.158960486	0.188467603	129	360	1	46	12	0	507	92	P_granule_transcripts	NA
WBGene00008740	F13D12.5	F13D12.5	19.5343809	2.924464234	0.14970857	129	100	0	18	0	0	507	662	P_granule_transcripts	NA
WBGene00009245	F29C12.3	rict-1	111.6317829	69.05895337	0.618631644	129	71	0	29	4	0	507	969	P_granule_transcripts	NA
WBGene00009270	F30F8.1	F30F8.1	54.72093567	33.82652219	0.618164177	129	97	0	14	5	1	507	688	P_granule_transcripts	NA
WBGene00000838	Y108G3AL.1	cul-3	217.2354243	99.00231237	0.455737423	127	139	0	36	19	4	517	420	P_granule_transcripts	NA
WBGene00000229	C34E10.6	atp-2	1058.906429	749.7501585	0.708041936	126	510	116	66	27	11	525	50	P_granule_transcripts	PGL-1_bound
WBGene00006604	Y47D3A.6	tra-1	48.98514794	26.69212709	0.544902449	125	132	11	19	10	0	533	449	P_granule_transcripts	NA
WBGene00000868	T06E6.2	cyb-3	2719.325181	5121.618768	1.883415343	124	157	0	104	30	0	537	347	P_granule_transcripts	NA
WBGene00009164	F26E4.11	hrdl-1	44.40236689	8.048692837	0.181267203	123	227	1	64	37	11	541	199	P_granule_transcripts	NA
WBGene00006439	T27E9.1	ant-1.1	1179.683037	748.6351739	0.634607052	122	323	1	119	8	21	552	110	P_granule_transcripts	NA
WBGene00016014	C23G10.7	C23G10.7	39.89479099	26.93033515	0.67503387	122	228	0	26	12	0	552	195	P_granule_transcripts	NA
WBGene00003794	Y41D4B.19	npp-8	523.5751005	509.5890071	0.973287321	120	199	1	60	21	0	569	238	P_granule_transcripts	NA
WBGene00005023	T24D1.1	sqv-5	61.52272347	9.653051811	0.156902219	119	216	1	25	11	0	578	214	P_granule_transcripts	NA
WBGene00000223	C07G2.2	atf-7	261.6750431	157.2807359	0.601053635	118	447	0	55	26	1	583	63	P_granule_transcripts	NA
WBGene00004269	F59B2.7	rab-6.1	22.87848969	13.64212633	0.596286141	118	120	1	7	1	0	583	522	P_granule_transcripts	NA
WBGene00011746	T13F2.6	T13F2.6	29.51539624	5.355559542	0.181449692	118	182	2	21	25	0	583	279	P_granule_transcripts	NA
WBGene00000098	K07C11.2	air-1	158.4145749	242.4116487	1.530235768	117	227	0	16	32	2	592	199	P_granule_transcripts	NA
WBGene00006437	K08B12.5	mrck-1	255.9446385	92.88983437	0.362929401	115	137	40	56	5	0	606	428	P_granule_transcripts	NA
WBGene00011299	R107.4	ikke-1	34.17487077	19.91410057	0.582711803	115	147	129	27	8	2	606	385	P_granule_transcripts	NA
WBGene00012765	Y41E3.7	Y41E3.7	91.02084612	66.66641293	0.732430161	114	199	0	38	45	25	614	238	P_granule_transcripts	NA
WBGene00019247	H27M09.3	syp-4	22.26074149	3.914400463	0.17584322	114	131	0	50	6	0	614	457	P_granule_transcripts	NA
WBGene00019719	M01H9.3	M01H9.3	29.75000447	59.54118739	2.001384149	114	264	2	12	11	1	614	155	P_granule_transcripts	NA
WBGene00002981	ZK593.6	lgg-2	124.04725	244.4351502	1.970500356	113	134	1	22	11	0	619	442	P_granule_transcripts	NA
WBGene00003598	F26F4.7	nhl-2	225.3311954	177.9224722	0.789604262	113	378	104	50	17	0	619	84	P_granule_transcripts	NA
WBGene00019163	H06H21.6	ubxn-6	160.0020415	167.79696	1.048717619	113	142	0	18	19	0	619	412	P_granule_transcripts	NA
WBGene00013354	Y59A8B.22	snx-6	91.07807964	108.739766	1.193918081	112	177	0	29	9	17	633	292	P_granule_transcripts	NA
WBGene00022508	ZC53.1	ZC53.1	7.809268017	2.688454586	0.344264607	112	152	0	18	3	0	633	365	P_granule_transcripts	NA
WBGene00003955	W03D2.4	pcn-1	1028.82905	1765.666094	1.716189968	110	133	0	61	8	0	650	445	P_granule_transcripts	NA
WBGene00007513	C10C6.5	wht-2	62.94342353	60.87175899	0.967086879	110	132	1	14	4	0	650	449	P_granule_transcripts	NA
WBGene00010923	M142.6	rle-1	75.49219116	56.15311452	0.743826794	109	200	1	29	4	19	661	235	P_granule_transcripts	NA
WBGene00000041	F54H12.1	aco-2	166.0145673	97.17137121	0.585318342	108	187	0	27	5	14	668	269	P_granule_transcripts	NA
WBGene00006911	R10E11.2	vha-2	164.8069074	312.6779718	1.897238269	108	162	7	71	11	29	668	331	P_granule_transcripts	NA
WBGene00010281	F58G11.3	F58G11.3	9.342891574	76.97031324	8.238382371	108	118	5	35	18	0	668	533	P_granule_transcripts	NA
WBGene00000200	K07C5.1	arx-2	102.3036599	98.33118778	0.961169794	106	159	0	13	12	0	681	338	P_granule_transcripts	NA
WBGene00004046	F45E4.2	plp-1	216.2575631	156.1985367	0.722280111	106	136	0	18	65	0	681	435	P_granule_transcripts	NA
WBGene00007624	C16C10.3	hrde-1	139.3144694	35.59761276	0.255519853	106	316	112	51	23	8	681	113	P_granule_transcripts	NA
WBGene00018953	F56C9.10	F56C9.10	410.9727572	500.3096033	1.217378998	106	236	10	52	56	4	681	180	P_granule_transcripts	NA
WBGene00009878	F49C12.9	F49C12.9	127.5989332	159.3007112	1.248448613	104	232	0	24	12	0	705	188	P_granule_transcripts	NA
WBGene00010731	K10C3.4	K10C3.4	91.92051466	41.80120664	0.454753836	104	182	6	88	12	4	705	279	P_granule_transcripts	NA
WBGene00009098	F25B3.1	ehbp-1	55.70005134	24.41169532	0.438270607	102	148	0	11	1	0	720	384	P_granule_transcripts	NA
WBGene00012182	W01D2.5	osta-3	18.3792452	6.804076289	0.370204337	101	143	1	23	5	1	731	406	P_granule_transcripts	NA
WBGene00012650	Y39A1A.12	orc-1	160.6871269	155.5008669	0.967724484	100	149	1	5	12	0	738	380	P_granule_transcripts	NA
WBGene00016603	C43E11.3	met-1	375.2618549	491.4206986	1.30954077	100	159	0	47	6	0	738	338	P_granule_transcripts	NA
WBGene00021753	Y50D7A.3	Y50D7A.3	84.10772106	38.71578726	0.460311928	100	145	0	23	0	3	738	395	P_granule_transcripts	NA
WBGene00021936	Y55F3BL.2	Y55F3BL.2	34.97063528	15.47994457	0.442655515	100	137	0	9	0	0	738	428	P_granule_transcripts	NA
WBGene00007030	Y111B2A.11	epc-1	451.3138505	166.5910232	0.369124553	98	131	12	81	11	35	754	457	P_granule_transcripts	NA
WBGene00007556	C14A4.3	C14A4.3	31.85092799	16.06640203	0.504424927	97	133	142	8	8	0	762	445	P_granule_transcripts	NA
WBGene00003155	C25D7.6	mcm-3	899.2988562	1279.76873	1.4230739	96	130	11	30	15	0	771	466	P_granule_transcripts	NA
WBGene00000168	K08D9.3	apx-1	17.94744739	5.582439479	0.311043646	94	160	1	28	3	1	790	337	P_granule_transcripts	NA
WBGene00001748	F56C9.1	gsp-2	617.9762543	808.2493685	1.307897129	94	208	17	92	31	6	790	221	P_granule_transcripts	NA
WBGene00012879	Y45F10C.3	fbxa-215	113.5088239	80.37024859	0.70805287	94	193	0	12	2	28	790	258	P_granule_transcripts	NA
WBGene00016291	C31H1.8	C31H1.8	36.85155832	4.913023149	0.133319278	94	197	0	19	19	6	790	244	P_granule_transcripts	NA
WBGene00017031	D1044.6	D1044.6	69.11697492	18.60082628	0.269120955	94	177	0	29	9	1	790	292	P_granule_transcripts	NA
WBGene00004147	T12F5.5	larp-5	241.6002318	150.8981622	0.624577887	93	126	1	38	10	0	801	492	P_granule_transcripts	NA
WBGene00006940	Y53C12A.1	wee-1.3	134.5187711	99.41196957	0.739019311	93	185	1	10	5	0	801	274	P_granule_transcripts	NA
WBGene00006617	C47D12.6	tars-1	150.9284265	102.5666443	0.679571414	92	249	82	42	8	0	811	171	P_granule_transcripts	NA
WBGene00008781	F14B4.3	rpoa-2	134.2274593	96.70577423	0.720461929	92	186	0	44	21	3	811	271	P_granule_transcripts	NA
WBGene00015312	C01G8.1	C01G8.1	62.2749272	0.525568869	0.008439494	91	264	6	39	7	0	820	155	P_granule_transcripts	NA
WBGene00015658	C09G12.9	tsg-101	86.07013337	135.0027451	1.568520227	90	198	0	17	0	0	827	241	P_granule_transcripts	NA
WBGene00021088	W08E12.7	W08E12.7	310.9650251	456.1390607	1.466850044	90	272	2	49	94	3	827	143	P_granule_transcripts	NA
WBGene00000417	C48D1.2	ced-3	72.37456547	53.00785419	0.732409982	89	132	0	21	19	2	841	449	P_granule_transcripts	NA
WBGene00003815	F22D6.3	nars-1	73.27753585	88.54619	1.208367462	89	143	0	18	5	0	841	406	P_granule_transcripts	NA
WBGene00001998	F32A11.2	hpr-17	52.64922784	46.24226115	0.87830844	88	138	41	35	3	0	853	425	P_granule_transcripts	NA
WBGene00005025	C52E12.3	sqv-7	12.74617059	3.96852266	0.311350192	88	147	48	39	66	2	853	385	P_granule_transcripts	NA
WBGene00013695	Y106G6A.2	epg-8	9.527928689	33.85291664	3.553019523	88	157	2	10	9	2	853	347	P_granule_transcripts	NA
WBGene00022203	Y73B3A.1	Y73B3A.1	39.73427284	29.5611961	0.743972243	88	123	0	9	7	2	853	508	P_granule_transcripts	NA
WBGene00004374	T11F8.3	rme-2	32.0785046	0.717234027	0.022358711	86	198	0	23	2	0	870	241	P_granule_transcripts	NA
WBGene00009173	F26H9.1	prom-1	15.99770798	4.128912465	0.258094001	86	162	18	13	19	0	870	331	P_granule_transcripts	NA
WBGene00009553	F39B2.1	F39B2.1	369.7787593	628.8436949	1.700594421	86	197	99	47	24	4	870	244	P_granule_transcripts	NA
WBGene00010139	F56A8.3	F56A8.3	125.5261421	212.9706504	1.696623882	86	129	0	14	15	0	870	475	P_granule_transcripts	NA
WBGene00021506	Y41D4A.4	Y41D4A.4	46.75964095	19.16257436	0.409810126	86	154	0	30	8	8	870	361	P_granule_transcripts	NA
WBGene00003153	Y67D8C.10	mca-3	170.962698	66.65329491	0.389870397	85	177	0	48	12	8	881	292	P_granule_transcripts	NA
WBGene00011282	R74.8	R74.8	69.56753807	34.08774552	0.489994996	85	158	0	4	2	4	881	343	P_granule_transcripts	NA
WBGene00021427	Y38F2AR.9	Y38F2AR.9	141.4620223	365.5693377	2.584222478	85	164	16	36	30	2	881	324	P_granule_transcripts	NA
WBGene00011625	T08G5.5	vps-39	183.3325029	159.9855489	0.872652401	84	253	0	27	9	2	892	168	P_granule_transcripts	NA
WBGene00019697	M01B12.4	M01B12.4	108.1765214	92.35525807	0.853745867	84	356	1	37	16	4	892	96	P_granule_transcripts	NA
WBGene00006529	C47B2.3	tba-2	2791.660421	4657.929122	1.668515657	83	135	0	89	67	3	900	440	P_granule_transcripts	NA
WBGene00013557	Y75B8A.24	Y75B8A.24	116.8424876	55.81554013	0.477699005	83	163	0	37	1	0	900	330	P_granule_transcripts	NA
WBGene00017349	F10E7.8	farl-11	117.2663648	110.1336155	0.939174807	83	144	0	33	3	1	900	401	P_granule_transcripts	NA
WBGene00077732	C30B5.1	szy-4	17.05095116	1.342360834	0.078726449	83	343	1	32	12	2	900	100	P_granule_transcripts	NA
WBGene00001609	F02A9.6	glp-1	90.56001313	23.95923752	0.264567514	82	129	0	31	27	0	914	475	P_granule_transcripts	NA
WBGene00012983	Y48B6A.12	men-1	63.19022941	58.45733029	0.925100776	82	151	0	45	1	0	914	371	P_granule_transcripts	NA
WBGene00000376	ZC518.3	ccr-4	556.9622142	637.4165582	1.144452069	81	187	0	85	50	10	921	269	P_granule_transcripts	NA
WBGene00000913	T07A9.6	daf-18	491.5196549	374.5089192	0.761940882	81	229	7	39	67	1	921	194	P_granule_transcripts	NA
WBGene00010908	M88.5	zbp-1	53.19259794	53.97612788	1.014730056	78	207	0	20	6	5	950	224	P_granule_transcripts	NA
WBGene00012982	Y48B6A.11	jmjd-2	170.6884166	233.6824852	1.369058837	78	174	0	20	19	0	950	305	P_granule_transcripts	NA
WBGene00000548	F56D1.4	clr-1	109.9682023	20.01943983	0.182047532	77	357	0	39	14	3	964	95	P_granule_transcripts	NA
WBGene00009594	F40F12.5	cyld-1	60.29737799	36.87540176	0.61155896	77	218	89	16	8	6	964	209	P_granule_transcripts	NA
WBGene00018037	F35C8.7	chtl-1	40.48287128	17.85605158	0.441076708	77	147	1	4	1	0	964	385	P_granule_transcripts	NA
WBGene00008920	F17C11.9	eef-1G	868.2863334	205.7358538	0.23694471	75	201	0	36	4	1	987	234	P_granule_transcripts	NA
WBGene00020259	T05E7.3	T05E7.3	50.41514259	43.60657427	0.864949934	75	234	40	8	6	0	987	185	P_granule_transcripts	NA
WBGene00000101	D1022.7	aka-1	170.7983186	181.1657393	1.060699782	74	299	3	43	4	2	1002	130	P_granule_transcripts	NA
WBGene00007969	C36A4.9	acs-19	78.63551927	24.12485314	0.306793334	74	251	1	56	3	0	1002	170	P_granule_transcripts	NA
WBGene00009082	F23B12.5	dlat-1	90.6518546	122.4351247	1.350608051	74	152	0	27	23	7	1002	365	P_granule_transcripts	NA
WBGene00017641	F20D12.1	csr-1	31.3816861	23.55849092	0.750708259	74	130	1	10	0	0	1002	466	P_granule_transcripts	NA
WBGene00003777	F20G4.3	nmy-2	631.29098	255.0240027	0.403972195	73	305	0	55	4	10	1015	126	P_granule_transcripts	NA
WBGene00006720	F25H2.8	ubc-25	312.7895047	393.844666	1.259136448	73	156	0	30	2	0	1015	353	P_granule_transcripts	NA
WBGene00011806	T16G12.5	ekl-6	170.7572321	161.6830529	0.946859181	73	123	0	19	18	0	1015	508	P_granule_transcripts	NA
WBGene00017826	F26F4.4	tag-340	24.05430246	6.602726471	0.274492535	73	124	0	7	6	1	1015	503	P_granule_transcripts	NA
WBGene00018509	F46F11.6	F46F11.6	29.38196357	15.67253608	0.533406695	73	168	1	14	12	0	1015	317	P_granule_transcripts	NA
WBGene00002078	ZK742.1	xpo-1	749.5071486	490.1556496	0.653970613	72	235	14	120	23	6	1028	183	P_granule_transcripts	NA
WBGene00002344	M7.1	let-70	150.5309748	191.1811257	1.270045092	72	150	0	64	30	3	1028	375	P_granule_transcripts	NA
WBGene00044067	T28F3.3	hke-4.1	24.95835381	0.802097038	0.032137418	72	118	15	17	23	0	1028	533	P_granule_transcripts	NA
WBGene00002297	T19E10.1	ect-2	224.1807802	210.4367213	0.938692073	71	156	0	14	0	1	1041	353	P_granule_transcripts	NA
WBGene00021238	Y20F4.3	gap-3	26.08779751	12.25448129	0.469739973	71	126	0	19	13	0	1041	492	P_granule_transcripts	NA
WBGene00009006	F21D5.1	F21D5.1	153.0257215	142.9420812	0.934104933	70	196	98	43	20	0	1058	250	P_granule_transcripts	NA
WBGene00015687	C10G11.7	C10G11.7	2420.954104	4553.873982	1.8810245	70	121	126	125	20	10	1058	517	P_granule_transcripts	PGL-1_bound
WBGene00000383	C17G10.4	cdc-14	366.1321302	314.4995359	0.858978248	69	218	17	45	10	1	1074	209	P_granule_transcripts	NA
WBGene00017088	E01A2.6	akir-1	170.2911938	338.1593736	1.985771349	68	252	0	52	17	3	1089	169	P_granule_transcripts	NA
WBGene00020896	T28D9.4	T28D9.4	18.00895895	51.36638766	2.852268574	67	131	0	10	0	2	1098	457	P_granule_transcripts	NA
WBGene00012341	W08D2.5	catp-6	36.41790495	2.524331863	0.06931568	66	224	6	13	7	0	1111	203	P_granule_transcripts	NA
WBGene00020442	T12A2.8	gen-1	30.20662769	7.244283927	0.239824319	66	125	0	5	7	1	1111	499	P_granule_transcripts	NA
WBGene00007683	C18E9.2	C18E9.2	8.492878616	54.22561439	6.384833322	65	164	0	26	3	0	1123	324	P_granule_transcripts	NA
WBGene00008921	F17C11.10	F17C11.10	381.3497737	585.3748092	1.535007622	65	152	1	49	8	1	1123	365	P_granule_transcripts	NA
WBGene00010896	M28.5	M28.5	590.7335975	542.3326798	0.918066421	65	118	3	36	0	0	1123	533	P_granule_transcripts	NA
WBGene00013606	Y102A5A.1	cand-1	531.4130011	596.6628445	1.122785561	65	185	0	45	7	0	1123	274	P_granule_transcripts	NA
WBGene00022296	Y76B12C.2	xpc-1	89.44329645	75.94048965	0.849035005	65	123	1	40	3	2	1123	508	P_granule_transcripts	NA
WBGene00019947	R08C7.3	htz-1	1101.135888	2860.070406	2.597381883	64	146	0	75	82	23	1135	390	P_granule_transcripts	NA
WBGene00008733	F13B12.6	F13B12.6	90.28191248	123.3573215	1.366356983	63	206	1	30	20	1	1143	226	P_granule_transcripts	NA
WBGene00000289	C01G6.8	cam-1	330.574312	264.635211	0.800531685	62	149	0	36	19	0	1152	380	P_granule_transcripts	NA
WBGene00010232	F58B3.6	F58B3.6	134.0790743	94.68468831	0.706185427	62	122	11	45	12	0	1152	514	P_granule_transcripts	NA
WBGene00004357	Y51H4A.3	rho-1	256.0308041	579.2384374	2.262377918	61	220	14	123	40	12	1169	206	P_granule_transcripts	NA
WBGene00006933	F59G1.3	vps-35	53.52276616	41.0071039	0.766161894	61	238	14	15	23	0	1169	178	P_granule_transcripts	NA
WBGene00077488	ZK218.22	ZK218.22	NA	NA	NA	1128	551	2	1865	236	353	8	40	P_granule_transcripts	NA
WBGene00014309	F07H5.5	F07H5.5	NA	NA	NA	112	177	0	214	70	29	633	292	P_granule_transcripts	NA
WBGene00017066	D2092.5	maco-1	62.07407	30.42426	0.4901282	8	137	112	69	22	0	2215	428	NA	PGL-1_bound
WBGene00000935	F56D1.7	daz-1	28.01684	4.549841	0.1623966	28	336	162	60	27	4	1728	104	NA	PGL-1_bound
WBGene00000411	R06F6.1	cdl-1	1088.27705	1316.5462	1.2097528	5	146	151	73	22	0	2452	390	NA	PGL-1_bound
WBGene00011240	R11A8.7	R11A8.7	312.0684303	260.03004	0.833246861	128	113	1	34	4	0	514	558	MEG-3_bound	NA
WBGene00007554	C13G3.3	pptr-2	88.92671174	124.7453974	1.402788825	127	83	1	11	10	0	517	825	MEG-3_bound	NA
WBGene00007586	C14C10.3	ril-2	66.22388492	15.6173776	0.235826962	127	93	0	7	0	24	517	719	MEG-3_bound	NA
WBGene00009583	F40F9.6	aagr-3	237.8684802	69.40658086	0.291785531	127	87	1	29	7	0	517	781	MEG-3_bound	NA
WBGene00001582	K02A11.1	gfi-2	135.6311471	109.704236	0.808842499	126	85	0	21	15	2	525	803	MEG-3_bound	NA
WBGene00001679	F13D12.7	gpb-1	263.5184803	461.1388388	1.74992979	126	72	85	134	25	6	525	955	MEG-3_bound	PGL-1_bound
WBGene00016333	C32F10.8	C32F10.8	33.3237448	23.1436273	0.694508599	126	76	0	4	4	0	525	906	MEG-3_bound	NA
WBGene00022598	ZC395.8	ztf-8	90.53925679	47.7191829	0.527055165	125	100	0	16	4	0	533	662	MEG-3_bound	NA
WBGene00000871	C37A2.4	cye-1	84.12316994	105.4035647	1.252967105	124	68	2	9	16	2	537	1015	MEG-3_bound	NA
WBGene00006601	Y17G7B.7	tpi-1	143.9294233	172.2021497	1.196434654	124	71	0	7	11	8	537	969	MEG-3_bound	NA
WBGene00002075	F28B3.8	imb-1	330.3863215	382.7119737	1.158377175	123	86	13	20	13	1	541	793	MEG-3_bound	NA
WBGene00002247	W03F8.5	lam-1	429.9445521	137.4874489	0.319779488	123	73	0	43	0	4	541	944	MEG-3_bound	NA
WBGene00004754	Y113G7A.3	sec-23	175.0667446	220.3559494	1.25869679	123	60	132	12	9	0	541	1113	MEG-3_bound	NA
WBGene00006768	ZK637.8	unc-32	256.2391438	202.7955218	0.791430688	123	90	2	34	16	1	541	745	MEG-3_bound	NA
WBGene00016562	C41D11.3	C41D11.3	179.7938131	153.7807224	0.855317097	123	90	124	13	62	1	541	745	MEG-3_bound	NA
WBGene00021315	Y32H12A.7	Y32H12A.7	26.5659861	12.43690328	0.468151389	123	97	0	28	4	0	541	688	MEG-3_bound	NA
WBGene00013355	Y59A8B.23	gck-3	63.9423225	103.4788553	1.618315558	122	80	1	14	4	0	552	854	MEG-3_bound	NA
WBGene00021541	Y42H9B.3	Y42H9B.3	84.17681593	94.16668459	1.118677198	122	63	10	6	33	1	552	1078	MEG-3_bound	NA
WBGene00007514	C10C6.6	catp-8	89.60763758	25.12255732	0.280361786	121	90	1	26	5	0	564	745	MEG-3_bound	NA
WBGene00005077	Y92H12A.1	src-1	228.5161123	269.0587134	1.177416816	120	88	0	22	6	7	569	769	MEG-3_bound	NA
WBGene00011742	T12G3.7	T12G3.7	27.32718169	10.60992024	0.388255194	120	78	0	9	4	4	569	878	MEG-3_bound	NA
WBGene00021367	Y37E11AM.3	Y37E11AM.3	35.62971124	14.47095291	0.406148476	120	65	25	3	11	0	569	1050	MEG-3_bound	NA
WBGene00000416	Y41D4B.13	ced-2	65.6407276	63.33640089	0.964894863	119	71	0	32	4	0	578	969	MEG-3_bound	NA
WBGene00000802	Y38A10A.5	crt-1	1780.551873	802.2803631	0.450579607	119	93	1	52	10	4	578	719	MEG-3_bound	NA
WBGene00000585	C06G3.10	cogc-2	56.90673167	64.84445351	1.139486518	118	86	0	10	3	2	583	793	MEG-3_bound	NA
WBGene00008546	F07A11.2	gfat-1	158.0885724	174.7766884	1.105561811	118	78	1	23	2	0	583	878	MEG-3_bound	NA
WBGene00008686	F11A10.5	F11A10.5	57.8942801	13.98601602	0.241578546	117	74	0	9	2	0	592	931	MEG-3_bound	NA
WBGene00015814	C16A3.10	C16A3.10	54.17588256	79.33886846	1.464468407	117	66	1	15	0	0	592	1036	MEG-3_bound	NA
WBGene00015512	C06A8.1	mthf-1	122.9572508	101.7112397	0.827208147	115	95	0	24	11	0	606	705	MEG-3_bound	NA
WBGene00022531	ZC155.3	morc-1	121.0845993	145.0122143	1.197610721	114	66	0	9	1	0	614	1036	MEG-3_bound	NA
WBGene00002169	F37A4.8	isw-1	708.4944622	997.9447144	1.408542716	113	79	0	26	7	2	619	864	MEG-3_bound	NA
WBGene00010627	K07C5.4	K07C5.4	673.3413353	648.8162422	0.963577027	113	66	1	20	1	0	619	1036	MEG-3_bound	NA
WBGene00001599	C55B7.1	glh-2	25.82765175	14.25313612	0.551855672	112	67	1	24	1	0	633	1025	MEG-3_bound	NA
WBGene00003901	F48E8.5	paa-1	800.9879088	1120.062175	1.398350915	112	62	1	45	10	0	633	1090	MEG-3_bound	NA
WBGene00001325	C44H4.7	eor-2	107.5806599	105.9199915	0.984563504	111	70	0	12	0	8	641	983	MEG-3_bound	NA
WBGene00010080	F55A11.7	F55A11.7	9.117605278	6.148193548	0.674321092	111	100	0	13	5	0	641	662	MEG-3_bound	NA
WBGene00020131	T01A4.1	gcy-28	21.40082257	6.016988853	0.281156896	111	83	0	14	5	1	641	825	MEG-3_bound	NA
WBGene00002583	B0261.2	let-363	294.1005474	131.5505111	0.447297743	110	69	90	34	15	7	650	997	MEG-3_bound	NA
WBGene00013034	Y49E10.11	tat-1	54.86652295	13.19914668	0.24056831	110	78	0	18	2	0	650	878	MEG-3_bound	NA
WBGene00000507	F44B9.4	cit-1.1	29.27881415	16.48285512	0.562961841	109	102	1	16	9	1	661	648	MEG-3_bound	NA
WBGene00008005	C38D4.4	C38D4.4	52.91334899	39.49918083	0.746488015	108	87	0	18	7	0	668	781	MEG-3_bound	NA
WBGene00002363	F38H4.9	let-92	355.315641	665.4883134	1.872949672	106	85	23	61	29	3	681	803	MEG-3_bound	NA
WBGene00009664	F43G9.1	idha-1	90.8396663	89.58335345	0.986169997	106	102	0	11	9	0	681	648	MEG-3_bound	NA
WBGene00011087	R07B7.2	R07B7.2	18.96724823	9.878008165	0.520792897	106	110	0	2	5	1	681	587	MEG-3_bound	NA
WBGene00018319	F41H10.6	hda-6	142.0477797	125.0343601	0.880227487	106	110	3	16	8	0	681	587	MEG-3_bound	NA
WBGene00000912	R13H8.1	daf-16	67.52901233	92.82277867	1.374561473	105	87	6	27	6	6	696	781	MEG-3_bound	NA
WBGene00004203	Y113G7B.23	swsn-1	915.6244549	1534.609556	1.676025087	105	60	1	51	9	6	696	1113	MEG-3_bound	NA
WBGene00011304	R166.5	mnk-1	216.2025643	119.4473819	0.552479025	105	62	0	46	4	14	696	1090	MEG-3_bound	NA
WBGene00012362	W09D10.4	W09D10.4	80.3122647	90.72872599	1.129699509	105	84	0	13	21	4	696	813	MEG-3_bound	NA
WBGene00021394	Y38C1AA.1	Y38C1AA.1	37.30367441	9.869303062	0.264566513	105	109	53	22	8	1	696	597	MEG-3_bound	NA
WBGene00000369	Y56A3A.20	ccf-1	118.1616735	267.5184397	2.264003478	104	109	18	28	27	6	705	597	MEG-3_bound	NA
WBGene00001058	R11E3.8	dpf-5	77.09919167	47.3638463	0.614323513	104	66	0	6	1	0	705	1036	MEG-3_bound	NA
WBGene00011510	T05H10.6	pdha-1	198.5300836	107.4747139	0.541352282	104	62	0	24	6	0	705	1090	MEG-3_bound	NA
WBGene00017895	F28B12.3	vrk-1	162.2432793	178.1604402	1.09810675	104	76	0	12	4	0	705	906	MEG-3_bound	NA
WBGene00022817	ZK783.2	upp-1	39.59190706	20.76282646	0.524420974	104	102	1	14	4	0	705	648	MEG-3_bound	NA
WBGene00000122	M18.7	aly-3	89.87242645	556.7147578	6.194500136	103	79	0	31	11	0	714	864	MEG-3_bound	NA
WBGene00015577	C07G3.9	ugt-64	14.62735835	3.797597218	0.259622902	103	73	0	1	0	0	714	944	MEG-3_bound	NA
WBGene00008506	F01G10.1	tkt-1	262.0879202	341.1394657	1.301622239	102	72	0	35	4	0	720	955	MEG-3_bound	NA
WBGene00009732	F45G2.4	cope-1	124.9713131	166.4621994	1.332003284	102	90	0	5	3	0	720	745	MEG-3_bound	NA
WBGene00011940	T23B5.3	T23B5.3	95.08071019	102.0793441	1.073607295	102	109	1	8	1	0	720	597	MEG-3_bound	NA
WBGene00010408	H19N07.4	mboa-2	14.75330488	4.254718605	0.288390882	101	117	0	7	8	0	731	543	MEG-3_bound	NA
WBGene00000201	Y79H2A.6	arx-3	81.58370245	83.28441217	1.020846194	100	93	19	16	10	0	738	719	MEG-3_bound	NA
WBGene00003158	ZK632.1	mcm-6	973.0437945	1269.892856	1.305072663	100	60	0	39	2	29	738	1113	MEG-3_bound	NA
WBGene00006804	Y37D8A.13	unc-71	162.7697167	31.48370892	0.193424855	99	111	0	28	4	0	748	574	MEG-3_bound	NA
WBGene00015347	C02F5.4	cids-1	64.62278197	104.6189878	1.618918045	99	94	0	1	4	0	748	713	MEG-3_bound	NA
WBGene00016610	C43G2.1	paqr-1	31.10211655	25.89843816	0.832690538	99	115	10	13	4	10	748	549	MEG-3_bound	NA
WBGene00000197	F28H1.3	aars-2	368.0229529	283.4050826	0.770074476	98	61	0	27	4	6	754	1104	MEG-3_bound	NA
WBGene00002214	M7.2	klc-1	83.21308776	73.53525972	0.883698246	98	84	24	13	13	0	754	813	MEG-3_bound	NA
WBGene00011050	R06A4.8	agl-1	230.474694	224.1714387	0.972650987	98	79	0	21	0	1	754	864	MEG-3_bound	NA
WBGene00000467	F52B5.5	cep-1	53.89714975	51.05523343	0.947271491	97	99	84	14	2	0	762	671	MEG-3_bound	NA
WBGene00017300	F09F7.3	rpc-2	210.1942279	97.40034222	0.463382573	97	92	0	9	4	0	762	734	MEG-3_bound	NA
WBGene00001630	Y39E4B.12	gly-5	25.38730277	3.94469626	0.155380676	96	78	0	16	3	17	771	878	MEG-3_bound	NA
WBGene00018483	F45F2.11	F45F2.11	53.71924876	33.42821683	0.622276327	96	79	1	0	1	0	771	864	MEG-3_bound	NA
WBGene00022372	Y92H12BR.7	Y92H12BR.7	28.37183714	17.81115038	0.627775716	96	60	12	2	2	0	771	1113	MEG-3_bound	NA
WBGene00004795	C04F5.1	sid-1	9.107953509	4.158080691	0.456532929	95	76	0	20	6	0	782	906	MEG-3_bound	NA
WBGene00011011	R04D3.3	R04D3.3	32.00105158	0.825978404	0.025810977	95	92	0	7	1	0	782	734	MEG-3_bound	NA
WBGene00015754	C14B9.8	C14B9.8	82.04503955	36.47670634	0.444593683	95	98	0	25	2	16	782	679	MEG-3_bound	NA
WBGene00000107	F54D8.3	alh-1	90.97633772	97.94255196	1.076571715	94	89	0	6	2	0	790	760	MEG-3_bound	NA
WBGene00015308	C01G5.6	C01G5.6	182.1737879	348.262096	1.911702557	94	66	0	26	1	0	790	1036	MEG-3_bound	NA
WBGene00009976	F53C11.7	swan-2	151.3090109	116.8269537	0.77210837	93	76	0	10	3	2	801	906	MEG-3_bound	NA
WBGene00013140	Y53C12A.4	mop-25.2	67.75174329	81.05157921	1.19630249	93	112	10	21	12	2	801	567	MEG-3_bound	NA
WBGene00007017	Y113G7B.18	mdt-17	196.0461202	176.0572438	0.898039929	92	77	0	10	17	0	811	893	MEG-3_bound	NA
WBGene00011066	R06C7.9	ztf-15	26.87953407	18.06720304	0.672154621	92	83	0	34	1	0	811	825	MEG-3_bound	NA
WBGene00017004	D1007.7	nrd-1	336.6827174	407.9016335	1.21153125	92	88	0	28	9	2	811	769	MEG-3_bound	NA
WBGene00021697	Y48G9A.3	gcn-1	128.93855	67.50063829	0.52351014	92	61	1	16	1	0	811	1104	MEG-3_bound	NA
WBGene00001102	C27A2.6	dsh-2	415.448848	480.212966	1.155889511	90	65	0	19	22	3	827	1050	MEG-3_bound	NA
WBGene00007846	C31E10.5	C31E10.5	75.09234762	69.01021007	0.919004563	90	63	0	6	1	0	827	1078	MEG-3_bound	NA
WBGene00015591	C08C3.4	cyk-7	18.72782573	9.893515987	0.528278943	90	75	0	4	0	0	827	921	MEG-3_bound	NA
WBGene00022119	Y71F9AL.17	copa-1	506.4797418	365.3817374	0.721414318	90	106	0	15	3	6	827	623	MEG-3_bound	NA
WBGene00009290	F31D4.2	F31D4.2	96.31585469	69.46795473	0.721251501	89	82	0	8	6	0	841	837	MEG-3_bound	NA
WBGene00013924	ZK20.3	rad-23	459.9914427	1012.48488	2.201095034	89	99	0	47	8	0	841	671	MEG-3_bound	NA
WBGene00004302	K01G5.4	ran-1	1036.371133	1647.643819	1.589820256	88	111	1	40	16	1	853	574	MEG-3_bound	NA
WBGene00008174	C48B4.11	C48B4.11	11.65109418	2.774666795	0.238146457	88	111	0	6	6	0	853	574	MEG-3_bound	NA
WBGene00008514	F02A9.4	F02A9.4	154.7899447	78.04009066	0.504167702	88	63	1	17	11	2	853	1078	MEG-3_bound	NA
WBGene00013193	Y54E2A.8	Y54E2A.8	6.125884103	1.870628099	0.305364592	87	75	0	1	2	0	866	921	MEG-3_bound	NA
WBGene00004951	K10B3.10	spc-1	2071.731248	2776.063216	1.339972652	86	75	0	58	3	0	870	921	MEG-3_bound	NA
WBGene00010263	F58G1.1	wago-4	37.66582437	22.84526993	0.606525154	86	74	1	21	2	0	870	931	MEG-3_bound	NA
WBGene00000869	C54G4.8	cyc-1	210.378568	126.482688	0.601214702	85	111	37	37	9	21	881	574	MEG-3_bound	NA
WBGene00000898	Y55D5A.5	daf-2	122.3678561	39.892271	0.326002859	85	62	0	38	3	11	881	1090	MEG-3_bound	NA
WBGene00007010	R10E12.1	alx-1	187.1580458	258.216058	1.379668488	85	64	0	12	0	0	881	1062	MEG-3_bound	NA
WBGene00012319	W07A8.2	W07A8.2	73.54303122	53.7725398	0.73117111	85	79	0	6	0	0	881	864	MEG-3_bound	NA
WBGene00006638	T14G10.6	tsp-12	56.3002345	29.2368467	0.519302397	84	82	1	11	5	3	892	837	MEG-3_bound	NA
WBGene00020383	T09B4.9	T09B4.9	35.75851542	22.64489438	0.633272777	83	86	1	8	7	12	900	793	MEG-3_bound	NA
WBGene00003396	F52F12.3	mom-4	59.29160217	50.66435406	0.854494603	82	60	24	14	6	0	914	1113	MEG-3_bound	NA
WBGene00000874	ZK328.1	cyk-3	98.86626754	23.70440214	0.239762284	81	76	0	18	2	1	921	906	MEG-3_bound	NA
WBGene00019322	K02F2.2	ahcy-1	401.9633685	476.1496758	1.184559871	81	71	0	17	4	8	921	969	MEG-3_bound	NA
WBGene00002201	T17E9.1	kin-18	276.0585993	165.1582237	0.598272338	80	104	19	27	14	2	927	633	MEG-3_bound	NA
WBGene00007703	C24H11.7	gbf-1	176.1902752	60.80643827	0.345118016	80	113	0	33	2	0	927	558	MEG-3_bound	NA
WBGene00016421	C34G6.5	cdc-7	26.66970452	21.0497032	0.789273956	80	69	0	11	2	0	927	997	MEG-3_bound	NA
WBGene00017837	F26G1.1	F26G1.1	72.75289098	52.82393323	0.726073322	80	107	0	20	14	0	927	618	MEG-3_bound	NA
WBGene00001173	F55A8.2	egl-4	212.8471917	116.3144726	0.546469379	79	90	0	62	15	0	937	745	MEG-3_bound	NA
WBGene00001647	T23G11.2	gna-2	45.17725525	25.24813928	0.558868376	79	97	0	6	12	0	937	688	MEG-3_bound	NA
WBGene00008641	F10B5.5	pch-2	83.73500199	97.86830604	1.168786095	79	93	1	3	5	0	937	719	MEG-3_bound	NA
WBGene00008710	F11E6.7	F11E6.7	699.6257404	1090.465639	1.558641393	79	113	0	25	7	0	937	558	MEG-3_bound	NA
WBGene00016115	C25H3.6	mdt-26	185.1548008	114.4467298	0.618113758	79	63	241	22	13	7	937	1078	MEG-3_bound	NA
WBGene00001284	F54C8.3	emb-30	116.6115673	84.66685811	0.72605883	78	109	0	8	0	0	950	597	MEG-3_bound	NA
WBGene00004053	ZK1005.1	pme-5	48.55474794	19.57700553	0.403194463	78	88	0	21	47	0	950	769	MEG-3_bound	NA
WBGene00003021	F44B9.6	lin-36	371.8028515	452.3238751	1.216569139	77	98	0	27	3	0	964	679	MEG-3_bound	NA
WBGene00011662	T09F3.2	T09F3.2	52.85365515	35.44122894	0.670553982	77	73	1	21	3	24	964	944	MEG-3_bound	NA
WBGene00011914	T22C1.3	T22C1.3	27.5393203	29.23503737	1.061574398	77	104	0	9	2	0	964	633	MEG-3_bound	NA
WBGene00022831	ZK973.2	cec-10	122.6824921	98.87413327	0.805935155	77	67	1	8	7	0	964	1025	MEG-3_bound	NA
WBGene00007640	C17D12.7	C17D12.7	248.1271001	257.9015144	1.039392772	76	73	10	14	5	0	976	944	MEG-3_bound	NA
WBGene00000418	C35D10.9	ced-4	93.53156072	123.9894851	1.325643281	75	83	0	12	5	1	987	825	MEG-3_bound	NA
WBGene00004736	K11D9.2	sca-1	429.0167188	181.6280303	0.423358863	75	60	0	121	6	2	987	1113	MEG-3_bound	NA
WBGene00007227	C01G6.5	C01G6.5	345.5355147	298.9196299	0.865090902	75	84	20	27	15	4	987	813	MEG-3_bound	NA
WBGene00003218	M04B2.1	mep-1	989.9780557	1385.687011	1.399714875	74	82	1	43	52	28	1002	837	MEG-3_bound	NA
WBGene00007646	C17E4.9	nkb-1	43.63258612	37.54241925	0.860421593	74	69	7	42	22	13	1002	997	MEG-3_bound	NA
WBGene00017045	D2007.5	atg-13	62.3268624	61.66756234	0.989421896	74	69	0	10	8	0	1002	997	MEG-3_bound	NA
WBGene00019326	K02F3.2	K02F3.2	97.12755787	97.40280837	1.002833907	74	69	0	8	1	0	1002	997	MEG-3_bound	NA
WBGene00013689	Y105E8B.4	bath-40	140.572969	130.0354411	0.925038733	73	67	0	26	0	0	1015	1025	MEG-3_bound	NA
WBGene00013967	ZK287.7	ZK287.7	19.85627236	15.26726663	0.76888886	73	86	0	2	0	0	1015	793	MEG-3_bound	NA
WBGene00001980	W02B9.1	hmr-1	363.6165837	111.9206428	0.30779851	71	79	0	53	2	0	1041	864	MEG-3_bound	NA
WBGene00005019	D2096.4	sqv-1	18.27286656	1.784952193	0.097683206	71	67	0	5	6	0	1041	1025	MEG-3_bound	NA
WBGene00010425	H37A05.1	lpin-1	38.37921884	16.36660506	0.426444455	71	79	1	13	7	0	1041	864	MEG-3_bound	NA
WBGene00011206	R10E4.11	R10E4.11	48.56853149	72.99185762	1.502863179	71	93	0	28	5	0	1041	719	MEG-3_bound	NA
WBGene00018008	F33D11.11	vpr-1	133.7190369	202.9862531	1.518005648	71	113	0	79	20	0	1041	558	MEG-3_bound	NA
WBGene00021649	Y47G6A.25	Y47G6A.25	15.22436288	6.195901314	0.406972782	71	63	0	6	6	0	1041	1078	MEG-3_bound	NA
WBGene00021854	Y54F10AR.1	Y54F10AR.1	29.05732049	50.08483221	1.723656255	71	65	20	4	14	4	1041	1050	MEG-3_bound	NA
WBGene00004110	C37A2.2	pqn-20	288.8824527	228.0527394	0.789430916	70	85	0	16	1	0	1058	803	MEG-3_bound	NA
WBGene00007105	B0035.1	B0035.1	259.6860092	167.6298034	0.645509567	70	98	0	20	0	0	1058	679	MEG-3_bound	NA
WBGene00010807	M01E5.4	M01E5.4	52.56190045	47.49074096	0.903520241	70	61	8	5	15	0	1058	1104	MEG-3_bound	NA
WBGene00012512	Y26E6A.1	ekl-5	64.14248094	81.37940436	1.268728667	70	80	0	5	11	8	1058	854	MEG-3_bound	NA
WBGene00019399	K04F10.7	K04F10.7	163.5252268	280.3086086	1.714161259	70	114	152	13	27	2	1058	554	MEG-3_bound	NA
WBGene00001914	K03A1.1	his-40	350.2059266	319.7417743	0.913010746	69	87	1	17	0	2	1074	781	MEG-3_bound	NA
WBGene00003111	Y71G12B.20	mab-20	137.8862164	72.1703575	0.523405163	69	81	0	31	2	9	1074	846	MEG-3_bound	NA
WBGene00000268	B0464.4	bre-3	8.15159935	0.925591308	0.113547203	68	106	0	12	9	0	1089	623	MEG-3_bound	NA
WBGene00007192	B0491.5	B0491.5	180.9227756	160.4432472	0.886805139	68	75	0	15	3	0	1089	921	MEG-3_bound	NA
WBGene00002219	K11D9.1	klp-7	40.110016	32.76416097	0.81685734	67	78	0	17	4	0	1098	878	MEG-3_bound	NA
WBGene00004307	C27B7.8	rap-1	112.7865925	151.327432	1.341714725	67	69	0	12	19	13	1098	997	MEG-3_bound	NA
WBGene00009587	F40F11.2	mig-38	282.406064	103.8874639	0.367865556	67	74	1	25	4	3	1098	931	MEG-3_bound	NA
WBGene00011776	T14G10.7	hpo-5	34.2721527	13.98777294	0.408138148	67	72	0	25	7	1	1098	955	MEG-3_bound	NA
WBGene00002000	F58D5.1	hrp-2	1600.477558	2566.672167	1.603691445	66	65	0	55	1	1	1111	1050	MEG-3_bound	NA
WBGene00002275	W01G7.5	lem-2	278.6275255	440.1479494	1.57970017	66	72	0	22	2	3	1111	955	MEG-3_bound	NA
WBGene00012804	Y43F4B.7	Y43F4B.7	27.29335583	22.90621428	0.839259724	65	99	0	9	9	1	1123	671	MEG-3_bound	NA
WBGene00013238	Y56A3A.21	trap-4	69.3176808	121.5997449	1.754238507	65	72	0	18	15	3	1123	955	MEG-3_bound	NA
WBGene00015567	C07D10.2	bath-44	43.24227203	48.34632731	1.118033929	65	76	1	4	9	0	1123	906	MEG-3_bound	NA
WBGene00017777	F25B5.6	F25B5.6	57.92098313	35.17390665	0.607273992	65	100	0	12	8	0	1123	662	MEG-3_bound	NA
WBGene00000254	K04F10.4	bli-4	99.51726737	13.04500641	0.131082844	63	108	0	49	15	0	1143	609	MEG-3_bound	NA
WBGene00010038	F54C8.5	rheb-1	30.78436723	24.6048993	0.79926604	63	61	0	5	5	0	1143	1104	MEG-3_bound	NA
WBGene00013577	Y76A2B.5	Y76A2B.5	33.00793798	47.22012724	1.430568831	62	85	0	8	11	5	1152	803	MEG-3_bound	NA
WBGene00009978	F53E4.1	F53E4.1	32.50273591	34.37946075	1.057740519	61	80	1	18	17	12	1169	854	MEG-3_bound	NA
WBGene00013669	Y105E8A.8	Y105E8A.8	49.23345868	48.92082809	0.993650038	61	97	0	40	6	0	1169	688	MEG-3_bound	NA
WBGene00017989	F32E10.1	nol-10	170.2047149	137.7545819	0.809346451	60	80	0	11	13	0	1178	854	MEG-3_bound	NA
WBGene00021467	Y39G10AR.9	Y39G10AR.9	85.22711268	84.03591087	0.986023206	60	109	15	83	9	1	1178	597	MEG-3_bound	NA
WBGene00014454	MTCE.7	MTCE.7	NA	NA	NA	93	97	12	429	79	112	801	688	MEG-3_bound	NA
