# Supplementary material for: Recruitment of mRNAs to P granules by condensation with intrinsically-disordered proteins
Source: eLife. 2020 Jan 24;9:e52896. doi: 10.7554/eLife.52896 (PMC7007223; doi:10.7554/eLife.52896)
Supplement: Supplementary file 2. [file elife-52896-supp2.csv]

Table S2 ribosome_occupnacy_for_P blastomere enriched genes
	SeqID	WBID	geneID	avg_mRNA_fpm	avg_Rb_fpm
13444	B0001.2	WBGene00007087	B0001.2	28.0149349	28.58748754
13446	B0001.4	WBGene00007089	B0001.4	43.15486231	48.21457727
13447	B0001.5	WBGene00007090	B0001.5	43.89517048	35.25634433
13448	B0001.7	WBGene00007092	B0001.7	91.86307449	114.5063564
13449	B0001.8	WBGene00007093	B0001.8	69.63852746	87.93625184
13453	B0024.13	WBGene00007102	B0024.13	5.538692074	0.793242158
13480	B0035.12	WBGene00007111	B0035.12	81.67050366	37.199143
13482	B0035.15	WBGene00007113	B0035.15	23.67454964	20.78088722
13488	B0035.6	WBGene00007109	B0035.6	146.9047211	141.519747
13492	B0041.5	WBGene00015009	B0041.5	28.05192479	5.511568431
13493	B0041.8	WBGene00015011	B0041.8	109.5220088	141.0435132
13525	B0207.6	WBGene00015029	B0207.6	20.98768859	31.00521847
13550	B0228.7	WBGene00015064	B0228.7	55.08925185	81.60663706
13561	B0238.9	WBGene00015073	B0238.9	17.82449385	7.712865542
13581	B0250.8	WBGene00007125	B0250.8	0.102943604	3.740831591
13589	B0261.7	WBGene00015095	B0261.7	82.09684967	64.54597029
13643	B0303.4	WBGene00015126	B0303.4	29.14812612	9.268593924
13646	B0304.2	WBGene00015134	B0304.2	18.11492987	15.61582718
13647	B0304.4	WBGene00015136	B0304.4	9.973128645	6.368823952
13675	B0336.7	WBGene00015147	B0336.7	52.23123566	43.40291787
13707	B0361.2	WBGene00015156	B0361.2	63.29929834	102.5454348
13710	B0361.6	WBGene00015160	B0361.6	55.18695623	41.75881343
13711	B0361.8	WBGene00015162	B0361.8	34.31228229	13.59353382
13738	B0393.6	WBGene00007171	B0393.6	14.6580846	30.48589658
13834	B0491.6	WBGene00007193	B0491.6	43.56915739	43.25925572
13881	B0511.13	WBGene00015238	B0511.13	25.80587589	7.138018083
13889	B0513.2	WBGene00007195	B0513.2	115.2588865	145.6607765
13899	B0524.6	WBGene00015245	B0524.6	20.30691531	17.06286439
13929	B0564.7	WBGene00007207	B0564.7	39.05882599	24.44206297
13957	C01B10.9	WBGene00015283	C01B10.9	16.07758658	5.338757488
14032	C01G5.5	WBGene00015307	C01G5.5	27.57814598	49.05272967
14042	C01G8.1	WBGene00015312	C01G8.1	62.2749272	0.525568869
14049	C01H6.6	WBGene00007255	C01H6.6	1.938376841	0.614701101
14134	C03A3.2	WBGene00007267	C03A3.2	6.810438522	3.290882564
14272	C04F12.1	WBGene00007297	C04F12.1	27.05927257	23.32107711
14277	C04F12.5	WBGene00007299	C04F12.5	7.679911521	2.948717004
14297	C04G6.4	WBGene00015454	C04G6.4	25.84667977	25.78747848
14299	C04G6.6	WBGene00015456	C04G6.6	0.119625556	0.065527459
14345	C05C10.3	WBGene00007330	C05C10.3	39.25327824	18.94352991
14346	C05C10.5	WBGene00007332	C05C10.5	187.8617516	306.6179899
14347	C05C10.7	WBGene00007334	C05C10.7	2.801339578	0.802097038
14454	C06A5.1	WBGene00015499	C06A5.1	141.9803356	135.247772
14458	C06A5.6	WBGene00015504	C06A5.6	22.48029718	9.261090004
14459	C06A5.8	WBGene00015505	C06A5.8	13.63134452	0.275233937
14504	C06E1.11	WBGene00015526	C06E1.11	0.730849232	0.596604815
14510	C06E1.9	WBGene00015524	C06E1.9	38.41807974	28.67339843
14562	C06G3.8	WBGene00015554	C06G3.8	32.14352324	30.58367895
14563	C06G4.1	WBGene00015557	C06G4.1	43.12276283	26.07572306
14733	C08F8.3	WBGene00007445	C08F8.3	99.900076	141.2077203
14752	C08H9.16	WBGene00086566	C08H9.16	42.30369732	51.68623484
14796	C09D4.4	WBGene00015635	C09D4.4	70.05238743	35.89751702
14818	C09E7.8	WBGene00015642	C09E7.8	13.54513314	13.24544852
14843	C09G5.7	WBGene00007489	C09G5.7	0.62552254	0.934722781
14844	C09G9.1	WBGene00007492	C09G9.1	35.39095048	34.05167976
14848	C09H10.10	WBGene00007504	C09H10.10	16.22251372	11.57637851
14917	C10G11.6	WBGene00015686	C10G11.6	13.29979316	15.22957508
14939	C11D2.7	WBGene00015703	C11D2.7	57.43670579	74.86943743
15018	C13B4.1	WBGene00007545	C13B4.1	17.88031055	2.613464095
15021	C13B7.6	WBGene00015731	C13B7.6	0	0
15042	C13F10.6	WBGene00015745	C13F10.6	63.18554828	37.25501427
15053	C13G5.2	WBGene00015747	C13G5.2	42.82707394	26.81626936
15082	C14B1.9	WBGene00007580	C14B1.9	25.40528923	1.188459073
15102	C14C11.2	WBGene00015766	C14C11.2	8.046108415	8.976171408
15238	C16A11.3	WBGene00015816	C16A11.3	2.436856949	1.333450987
15239	C16A11.4	WBGene00015817	C16A11.4	42.17370222	30.2887779
15240	C16A11.5	WBGene00015818	C16A11.5	1.125138099	0.29619528
15243	C16A3.10	WBGene00015814	C16A3.10	54.17588256	79.33886846
15263	C16C10.1	WBGene00007622	C16C10.1	13.19669538	7.228129871
15265	C16C10.2	WBGene00007623	C16C10.2	57.91303352	65.63528092
15279	C16C8.11	WBGene00015849	C16C8.11	15.41269199	21.55638506
15280	C16C8.12	WBGene00015850	C16C8.12	2.198521287	1.099105214
15281	C16C8.13	WBGene00015851	C16C8.13	0.244754801	0.395808183
15282	C16C8.14	WBGene00015852	C16C8.14	4.103190536	6.202556018
15283	C16C8.16	WBGene00015853	C16C8.16	15.93977435	24.04807372
15291	C16C8.4	WBGene00015842	C16C8.4	11.1546617	8.972565305
15292	C16C8.5	WBGene00015843	C16C8.5	5.32069932	8.684373927
15396	C17E7.4	WBGene00015899	C17E7.4	76.2568669	115.0251135
15440	C17H11.2	WBGene00015922	C17H11.2	20.26425912	16.76237869
15534	C18D11.3	WBGene00007681	C18D11.3	42.46849003	22.11594711
15546	C18E3.5	WBGene00015974	C18E3.5	36.13355697	52.55033037
15547	C18E3.9	WBGene00015976	C18E3.9	23.25603146	27.07946516
15558	C18F10.7	WBGene00015978	C18F10.7	70.44735006	24.99695513
15603	C23G10.2	WBGene00016011	C23G10.2	54.30835576	62.33353116
15611	C23H3.3	WBGene00016019	C23H3.3	39.33923449	42.2675288
15712	C25A1.5	WBGene00007707	C25A1.5	39.14540412	16.00525725
15807	C25H3.3	WBGene00016112	C25H3.3	19.97843443	24.55245786
15808	C25H3.4	WBGene00016113	C25H3.4	48.18716587	63.64176317
15809	C25H3.7	WBGene00016116	C25H3.7	50.83149822	31.09976967
15817	C26B2.7	WBGene00016129	C26B2.7	12.93422378	9.645344911
15848	C26E6.12	WBGene00016145	C26E6.12	23.74776087	12.75866421
15885	C27A7.6	WBGene00007757	C27A7.6	0.149252427	0.065527459
15889	C27B7.5	WBGene00007762	C27B7.5	71.78282031	69.46945468
15895	C27C12.3	WBGene00007773	C27C12.3	2.263206755	1.064316806
15913	C27D8.4	WBGene00007780	C27D8.4	15.87751654	3.419127391
15914	C27D9.1	WBGene00016163	C27D9.1	8.291904115	1.753085571
15917	C27F2.10	WBGene00016171	C27F2.10	87.79592513	134.2918678
15924	C27F2.7	WBGene00016169	C27F2.7	2.433085237	0.581373586
15938	C27H6.9	WBGene00077500	C27H6.9	16.54270122	18.62531932
15939	C28A5.1	WBGene00007788	C28A5.1	22.57400778	13.04755679
15943	C28A5.2	WBGene00007789	C28A5.2	22.29612193	16.51169179
15950	C28C12.12	WBGene00016182	C28C12.12	27.61213595	23.00865592
15974	C28H8.3	WBGene00016194	C28H8.3	174.4037549	119.5569631
15979	C29A12.1	WBGene00007797	C29A12.1	18.8471438	6.878032258
15997	C29E4.13	WBGene00043051	C29E4.13	17.0808291	22.67641609
16058	C30A5.3	WBGene00016238	C30A5.3	109.0124218	239.7332112
16094	C30F12.4	WBGene00016263	C30F12.4	22.186778	3.171824177
16110	C30G12.6	WBGene00016277	C30G12.6	20.09121215	10.3910974
16123	C30H6.7	WBGene00007824	C30H6.7	5.472862749	20.79983625
16161	C31H1.8	WBGene00016291	C31H1.8	36.85155832	4.913023149
16213	C32D5.11	WBGene00016318	C32D5.11	123.8738968	83.86623157
16232	C32E8.3	WBGene00016321	C32E8.3	45.63590016	51.98323063
16236	C32E8.9	WBGene00016325	C32E8.9	7.339483128	10.25242863
16238	C32F10.8	WBGene00016333	C32F10.8	33.3237448	23.1436273
16331	C34B2.5	WBGene00016390	C34B2.5	24.43501254	21.09872561
16347	C34B7.2	WBGene00007912	C34B7.2	70.63247787	50.22223875
16350	C34C12.2	WBGene00007921	C34C12.2	79.55891135	60.90791172
16354	C34C12.8	WBGene00007927	C34C12.8	76.29188214	46.20433638
16359	C34C6.4	WBGene00007917	C34C6.4	24.00043286	14.34076585
16377	C34D4.10	WBGene00016402	C34D4.10	0.560753687	0.065527459
16381	C34E10.10	WBGene00016411	C34E10.10	36.88421345	31.14442707
16511	C35D10.6	WBGene00016443	C35D10.6	52.49399552	43.22622776
16512	C35D10.7	WBGene00016444	C35D10.7	65.19353326	58.19810592
16527	C35E7.8	WBGene00016460	C35E7.8	13.94230323	20.34337798
16531	C36A4.4	WBGene00007965	C36A4.4	20.80009592	7.401643777
16532	C36A4.5	WBGene00007966	C36A4.5	10.89721295	6.193257884
16533	C36B1.11	WBGene00007978	C36B1.11	53.1680832	62.14748265
16552	C36C9.1	WBGene00016485	C36C9.1	33.16764691	27.5692111
16641	C38D4.4	WBGene00008005	C38D4.4	52.91334899	39.49918083
16645	C38D9.2	WBGene00008010	C38D9.2	1.02601793	3.402010661
16682	C39E9.11	WBGene00008034	C39E9.11	155.2239788	234.5190735
16778	C41G7.3	WBGene00008061	C41G7.3	14.22426535	2.722594997
16793	C42C1.13	WBGene00016591	C42C1.13	9.787497003	4.598788312
16796	C42C1.4	WBGene00016582	C42C1.4	26.41834659	10.25619964
16797	C42C1.8	WBGene00016586	C42C1.8	39.49836226	38.00763935
16868	C44B7.10	WBGene00016630	C44B7.10	56.73863847	43.567061
16870	C44B7.12	WBGene00016632	C44B7.12	84.13763768	103.3815197
16882	C44B9.2	WBGene00008079	C44B9.2	1.789695079	2.104160977
16987	C46A5.5	WBGene00016701	C46A5.5	3.447680549	1.652548077
16988	C46A5.6	WBGene00016702	C46A5.6	13.31637048	4.436439395
16997	C46C2.3	WBGene00008111	C46C2.3	0.214642159	1.633269254
17062	C47E12.2	WBGene00008147	C47E12.2	36.86956283	18.60262049
17095	C47G2.3	WBGene00008164	C47G2.3	47.30383718	25.35159503
17110	C48B4.10	WBGene00008173	C48B4.10	1.591139854	2.831654049
17111	C48B4.11	WBGene00008174	C48B4.11	11.65109418	2.774666795
17115	C48B4.6	WBGene00008169	C48B4.6	3.80219376	5.785824575
17116	C48B4.7	WBGene00008170	C48B4.7	14.73765082	24.77020456
17117	C48B4.8	WBGene00008171	C48B4.8	1.677200313	0.82100622
17118	C48B4.9	WBGene00008172	C48B4.9	7.036859173	3.958578291
17151	C48E7.2	WBGene00016750	C48E7.2	37.97234616	37.90794851
17177	C49C3.6	WBGene00008196	C49C3.6	64.5815544	53.17184755
17178	C49C3.7	WBGene00008197	C49C3.7	43.52767789	31.78978929
17236	C50C3.1	WBGene00016799	C50C3.1	10.47566655	3.121694608
17265	C50E3.5	WBGene00016816	C50E3.5	16.39452999	11.76231355
17278	C50F4.12	WBGene00008236	C50F4.12	18.78740578	19.25577107
17279	C50F4.16	WBGene00008238	C50F4.16	26.18324037	20.22936362
17373	C53B4.4	WBGene00008274	C53B4.4	51.06101985	5.938322172
17505	C54G4.9	WBGene00008318	C54G4.9	28.47965978	51.64769055
17539	C55A6.1	WBGene00008330	C55A6.1	64.28387176	42.015179
17637	CD4.8	WBGene00016993	CD4.8	17.94351194	10.40017391
17657	D1007.8	WBGene00017005	D1007.8	26.45794318	38.01682323
17682	D1037.1	WBGene00017025	D1037.1	53.88928145	46.4485113
17684	D1043.1	WBGene00008361	D1043.1	118.4318157	93.23097952
17692	D1044.6	WBGene00017031	D1044.6	69.11697492	18.60082628
17719	D1054.3	WBGene00008371	D1054.3	138.8151754	195.3655484
17741	D1081.6	WBGene00008384	D1081.6	23.96037919	32.88873313
17742	D1081.7	WBGene00008385	D1081.7	73.38355183	46.24233123
17744	D1081.9	WBGene00008387	D1081.9	3.496486076	4.519526837
17761	D2005.4	WBGene00008399	D2005.4	68.2260062	65.38490438
17763	D2005.7	WBGene00086551	D2005.7	19.63314784	34.53651024
17787	D2023.4	WBGene00008408	D2023.4	17.0419667	25.48492374
17788	D2023.6	WBGene00008410	D2023.6	16.65533017	2.120371763
17804	D2030.7	WBGene00008417	D2030.7	31.05147216	20.80336618
17805	D2030.8	WBGene00008418	D2030.8	79.4035814	135.2716417
17834	D2096.1	WBGene00017069	D2096.1	5.36702846	1.340308672
17836	D2096.11	WBGene00017078	D2096.11	0.305102262	0
17837	D2096.12	WBGene00017079	D2096.12	19.13998374	15.99272442
17853	DY3.8	WBGene00008440	DY3.8	39.82917113	71.82433141
17913	E02H9.3	WBGene00017101	E02H9.3	9.133852771	6.521376515
17933	E04D5.1	WBGene00008480	E04D5.1	306.841943	170.7681249
17951	EEED8.14	WBGene00017142	EEED8.14	10.64284662	5.577853819
17956	EEED8.3	WBGene00017134	EEED8.3	226.2879585	292.1706628
17971	E_BE45912.2	WBGene00017153	E_BE45912.2	2.212294156	1.605061938
18000	F01F1.11	WBGene00017165	F01F1.11	98.36603969	118.8775908
18024	F01G4.4	WBGene00008503	F01G4.4	31.85069525	18.89542601
18058	F02E8.4	WBGene00017177	F02E8.4	24.25020271	2.625570558
18066	F02E9.7	WBGene00008531	F02E9.7	28.31030787	5.909263878
18098	F07B7.2	WBGene00017186	F07B7.2	0	0
18117	F07C6.4	WBGene00008555	F07C6.4	106.7468401	55.40997818
18146	F07H5.10	WBGene00008561	F07H5.10	19.86203855	14.71141708
18210	F08F3.6	WBGene00017263	F08F3.6	80.01263658	112.0355802
18325	F09E5.2	WBGene00017282	F09E5.2	31.99583904	30.83342517
18368	F09G2.8	WBGene00017316	F09G2.8	63.87802374	51.80619917
18381	F10B5.2	WBGene00008639	F10B5.2	32.12953738	33.67954996
18383	F10B5.8	WBGene00008642	F10B5.8	41.51735358	42.92242846
18432	F10E7.2	WBGene00017344	F10E7.2	18.38398871	17.50449484
18485	F11A10.5	WBGene00008686	F11A10.5	57.8942801	13.98601602
18599	F12A10.8	WBGene00017397	F12A10.8	6.521370058	1.264245576
18663	F13B12.6	WBGene00008733	F13B12.6	90.28191248	123.3573215
18700	F13D12.5	WBGene00008740	F13D12.5	19.5343809	2.924464234
18807	F14D2.14	WBGene00017462	F14D2.14	0.409428612	0.065527459
18808	F14D2.15	WBGene00023427	F14D2.15	3.043300087	2.311760328
18812	F14D2.2	WBGene00017451	F14D2.2	0.600327053	0.094104416
18815	F14D2.8	WBGene00017456	F14D2.8	0.487179668	0.324772238
18933	F15D3.6	WBGene00008856	F15D3.6	19.85900445	17.64711991
18936	F15D4.2	WBGene00008859	F15D4.2	49.54864942	18.40221215
18939	F15D4.6	WBGene00008863	F15D4.6	0.074903611	0.25508549
18968	F16A11.2	WBGene00008877	F16A11.2	27.35764339	21.62826493
19093	F18A1.7	WBGene00017548	F18A1.7	109.7481095	63.75996608
19153	F19B10.5	WBGene00017587	F19B10.5	1.992783548	1.508850394
19207	F19H6.4	WBGene00008959	F19H6.4	23.9329995	19.8439305
19256	F20D1.3	WBGene00008975	F20D1.3	56.66001947	119.5110478
19282	F20H11.1	WBGene00017646	F20H11.1	63.09942197	64.16675845
19314	F21D5.1	WBGene00009006	F21D5.1	153.0257215	142.9420812
19335	F21F3.4	WBGene00017674	F21F3.4	3.07888317	2.296750726
19336	F21F3.6	WBGene00017675	F21F3.6	36.55054198	71.75037289
19402	F22D6.9	WBGene00009054	F22D6.9	3.284300555	0.488618368
19465	F23A7.4	WBGene00009069	F23A7.4	79.06850685	0.628583132
19467	F23A7.8	WBGene00044638	F23A7.8	221.9054262	3.436079223
19482	F23C8.8	WBGene00017737	F23C8.8	0.410689179	0.262109836
19492	F23F1.10	WBGene00017750	F23F1.10	29.87031415	24.53700677
19496	F23F1.5	WBGene00017746	F23F1.5	109.1559363	154.4749564
19541	F25B5.3	WBGene00017775	F25B5.3	29.80954873	8.481246778
19556	F25D7.4	WBGene00009113	F25D7.4	9.173351647	4.593279825
19725	F26E4.4	WBGene00009159	F26E4.4	103.0078107	62.23324553
19753	F26F2.7	WBGene00009172	F26F2.7	45.49334916	14.64474517
19759	F26F4.5	WBGene00017827	F26F4.5	49.30832315	62.28744742
19760	F26F4.6	WBGene00017828	F26F4.6	52.44039554	46.20946994
19763	F26G1.1	WBGene00017837	F26G1.1	72.75289098	52.82393323
19850	F28B3.6	WBGene00017887	F28B3.6	33.6415065	4.850527408
19950	F29B9.1	WBGene00017919	F29B9.1	13.03262969	21.17253435
20009	F30A10.3	WBGene00009262	F30A10.3	39.86501298	32.28116455
20015	F30F8.1	WBGene00009270	F30F8.1	54.72093567	33.82652219
20082	F31F6.1	WBGene00009300	F31F6.1	2.614371976	0.639876699
20102	F32A11.1	WBGene00009307	F32A11.1	48.64862829	33.49185879
20118	F32A7.4	WBGene00009305	F32A7.4	30.17716557	11.86806429
20156	F32D1.7	WBGene00017986	F32D1.7	214.8810105	171.9282347
20223	F33D4.4	WBGene00017996	F33D4.4	14.9252922	4.613149917
20225	F33E11.2	WBGene00018010	F33E11.2	9.494713921	1.71726264
20236	F33G12.3	WBGene00018015	F33G12.3	27.11860636	26.61741496
20237	F33G12.5	WBGene00018017	F33G12.5	140.9580196	61.22682624
20255	F34D10.4	WBGene00009374	F34D10.4	38.37889248	32.16036515
20307	F35C11.5	WBGene00009404	F35C11.5	17.27126628	0.418118724
20383	F35G12.5	WBGene00009442	F35G12.5	5.464295315	4.188654844
20385	F35G2.1	WBGene00009435	F35G2.1	24.1152604	10.83535616
20411	F35H10.6	WBGene00018071	F35H10.6	23.20193794	28.03524586
20502	F36H12.2	WBGene00018118	F36H12.2	2.408585531	6.514425781
20558	F37C12.3	WBGene00018151	F37C12.3	112.2137799	99.46353804
20647	F38E1.9	WBGene00018181	F38E1.9	25.35937209	32.93699311
20722	F39H2.3	WBGene00009563	F39H2.3	28.88964773	30.92799325
20767	F40F8.1	WBGene00009575	F40F8.1	58.35778884	33.79744701
20805	F40H3.1	WBGene00018249	F40H3.1	4.193567588	3.476557899
20936	F42A8.3	WBGene00009627	F42A8.3	13.87576635	9.773847685
20943	F42A9.6	WBGene00018335	F42A9.6	17.23816586	9.763367013
21066	F43E2.1	WBGene00018390	F43E2.1	18.6000845	18.57918062
21081	F43G9.12	WBGene00009672	F43G9.12	79.32132942	109.9032313
21128	F44E2.10	WBGene00018423	F44E2.10	17.0324638	15.50867483
21159	F44E7.5	WBGene00018427	F44E7.5	44.555872	55.82923329
21169	F44F4.3	WBGene00009702	F44F4.3	0.10513843	0.273939705
21240	F45F2.10	WBGene00018482	F45F2.10	118.6927496	110.78915
21241	F45F2.11	WBGene00018483	F45F2.11	53.71924876	33.42821683
21245	F45F2.9	WBGene00018481	F45F2.9	20.20168468	8.2063444
21246	F45G2.10	WBGene00009736	F45G2.10	33.22252783	28.95022615
21289	F46B6.12	WBGene00009776	F46B6.12	27.29485391	16.70058591
21297	F46B6.5	WBGene00009770	F46B6.5	128.3298634	44.36530911
21340	F46F11.10	WBGene00018513	F46F11.10	4.357755294	3.468019457
21343	F46F11.6	WBGene00018509	F46F11.6	29.38196357	15.67253608
21344	F46F11.7	WBGene00018510	F46F11.7	5.733960261	2.961951038
21345	F46F11.8	WBGene00018511	F46F11.8	14.0984886	18.43914753
21519	F47G3.3	WBGene00018578	F47G3.3	35.42347325	36.17136544
21538	F48A11.4	WBGene00018585	F48A11.4	44.81861381	61.35543992
21560	F48C1.5	WBGene00018598	F48C1.5	19.40935028	18.00009947
21586	F48E8.2	WBGene00018609	F48E8.2	42.91537436	40.86073352
21742	F52B11.2	WBGene00009925	F52B11.2	31.13101985	27.07334852
21745	F52B5.2	WBGene00009921	F52B5.2	65.30970733	108.8000396
21750	F52C12.2	WBGene00018679	F52C12.2	36.7009026	25.57852817
21756	F52C6.2	WBGene00018659	F52C6.2	23.1400603	19.07375425
21757	F52C6.3	WBGene00018660	F52C6.3	1.339780258	0.779841463
21758	F52C6.4	WBGene00018661	F52C6.4	0.431858608	0.151258331
21761	F52C9.3	WBGene00018674	F52C9.3	29.45286957	25.32440535
21831	F52H2.5	WBGene00018717	F52H2.5	9.436609307	10.90116198
21929	F53F10.3	WBGene00018765	F53F10.3	29.04199105	43.87922327
21932	F53F10.8	WBGene00044423	F53F10.8	3.218355949	3.605765399
21952	F53F8.3	WBGene00010000	F53F8.3	112.7318884	129.3786993
22033	F54D10.5	WBGene00018806	F54D10.5	31.63412997	39.93863054
22038	F54D11.4	WBGene00018814	F54D11.4	30.51196307	28.79340613
22063	F54D5.2	WBGene00010048	F54D5.2	15.97661733	6.734057982
22155	F55A11.7	WBGene00010080	F55A11.7	9.117605278	6.148193548
22156	F55A11.8	WBGene00010081	F55A11.8	13.28331459	16.68920361
22157	F55A12.10	WBGene00018867	F55A12.10	2.848112424	0.818899092
22242	F55D12.5	WBGene00010113	F55D12.5	3.415350159	0.985333687
22282	F55G1.6	WBGene00018902	F55G1.6	10.90367669	11.82919021
22348	F56B3.4	WBGene00004824	F56B3.4	61.15789596	90.63164125
22371	F56C9.3	WBGene00018948	F56C9.3	31.08197611	13.73104046
22372	F56C9.6	WBGene00018950	F56C9.6	60.69721371	35.33405891
22375	F56D1.1	WBGene00018959	F56D1.1	32.40572957	6.011480366
22440	F56F11.4	WBGene00018991	F56F11.4	103.3128115	216.7910854
22512	F57B10.4	WBGene00019002	F57B10.4	119.4467651	185.1471335
22532	F57C2.5	WBGene00010197	F57C2.5	54.27587612	20.50417727
22598	F58A4.2	WBGene00010227	F58A4.2	11.11206026	3.529554288
22608	F58B3.4	WBGene00010231	F58B3.4	60.17358999	51.91986981
22679	F58G1.2	WBGene00010264	F58G1.2	22.04525692	9.952130795
22685	F58G11.3	WBGene00010281	F58G11.3	9.342891574	76.97031324
22738	F59A3.2	WBGene00019075	F59A3.2	11.91859907	8.564279254
22739	F59A3.4	WBGene00019077	F59A3.4	51.9892362	21.7941481
22776	F59B2.3	WBGene00010308	F59B2.3	78.8062801	89.98268628
22844	F59G1.8	WBGene00019129	F59G1.8	19.16832828	13.70201848
22845	F59H5.1	WBGene00019130	F59H5.1	58.91161967	44.44107952
22848	F59H6.2	WBGene00019133	F59H6.2	0.225225404	1.539756106
22872	H02I12.5	WBGene00010353	H02I12.5	14.54904178	3.139254591
22911	H05L14.2	WBGene00010367	H05L14.2	7.044291252	5.301658972
23021	H20J04.9	WBGene00044310	H20J04.9	4.896375396	4.145492892
23088	H31G24.3	WBGene00019254	H31G24.3	1.919847787	1.602141915
23271	K02B12.5	WBGene00010498	K02B12.5	60.46204753	91.74352036
23289	K02C4.3	WBGene00010502	K02C4.3	170.3465968	189.0010597
23389	K03B4.1	WBGene00019353	K03B4.1	41.79152599	28.57294062
23433	K03H1.11	WBGene00010546	K03H1.11	24.09004425	16.74664924
23558	K05C4.4	WBGene00010581	K05C4.4	0.318899485	0.43357158
23631	K07A1.1	WBGene00010608	K07A1.1	26.58375235	7.557283024
23635	K07A1.17	WBGene00044987	K07A1.17	14.65478957	3.47936799
23644	K07A12.1	WBGene00010620	K07A12.1	87.92514026	82.75411139
23711	K07E8.7	WBGene00019498	K07E8.7	29.38357782	24.52573008
23712	K07F5.12	WBGene00010637	K07F5.12	7.846338449	1.764748779
23733	K07H8.3	WBGene00019505	K07H8.3	32.75401703	49.94458653
23866	K08F11.1	WBGene00019541	K08F11.1	2.479701894	4.182610054
23872	K08F4.3	WBGene00010678	K08F4.3	11.99049309	7.431774676
23893	K08H2.3	WBGene00010690	K08H2.3	13.2126426	17.74019157
23944	K09D9.12	WBGene00019569	K09D9.12	0.110817451	1.678593299
23983	K09F6.3	WBGene00019586	K09F6.3	0.089268559	0.324772238
24010	K09H9.7	WBGene00019598	K09H9.7	3.841998472	3.69539585
24035	K10C3.5	WBGene00010732	K10C3.5	38.59727702	38.52852422
24054	K10D2.5	WBGene00019631	K10D2.5	22.70003559	8.070616853
24133	K11D2.4	WBGene00010770	K11D2.4	5.28005214	2.416936684
24180	K11H12.8	WBGene00019664	K11H12.8	61.85348178	86.35543562
24187	K11H3.3	WBGene00010780	K11H3.3	43.47940663	32.64184571
24188	K11H3.4	WBGene00010781	K11H3.4	1.436229821	0.453774994
24205	K12D12.5	WBGene00010787	K12D12.5	16.29111314	12.9386644
24235	K12H6.2	WBGene00019683	K12H6.2	6.625861062	0.774332976
24244	M01A10.1	WBGene00019692	M01A10.1	16.8687493	11.23835535
24264	M01E11.3	WBGene00019712	M01E11.3	4.473407945	2.529137387
24272	M01F1.4	WBGene00010810	M01F1.4	24.70108477	8.736055675
24273	M01F1.8	WBGene00010814	M01F1.8	12.39850906	10.67045431
24274	M01F1.9	WBGene00010815	M01F1.9	33.09539243	21.81211502
24288	M01G5.1	WBGene00019715	M01G5.1	69.13508521	83.13782471
24345	M03C11.6	WBGene00010843	M03C11.6	6.312814421	7.426487816
24380	M04B2.2	WBGene00010846	M04B2.2	10.02990155	8.492595311
24426	M106.3	WBGene00010911	M106.3	101.5591772	94.17395176
24428	M106.7	WBGene00044924	M106.7	24.40574868	24.06481729
24433	M110.3	WBGene00010913	M110.3	35.15078837	39.76632037
24438	M116.5	WBGene00019792	M116.5	7.610245496	6.219411275
24452	M151.3	WBGene00019795	M151.3	4.32424629	33.35824481
24454	M151.7	WBGene00019799	M151.7	13.91474187	16.01577777
24492	M18.3	WBGene00010889	M18.3	27.28339509	28.31630119
24493	M18.6	WBGene00010891	M18.6	32.71135889	28.53706273
24514	M57.2	WBGene00019778	M57.2	109.8454114	215.4058522
24605	R02D3.3	WBGene00019821	R02D3.3	82.26873556	77.28178942
24606	R02D3.4	WBGene00019822	R02D3.4	129.9355062	127.2496136
24645	R02F11.4	WBGene00019842	R02F11.4	128.3341814	145.9534118
24652	R02F2.4	WBGene00019833	R02F2.4	12.784553	0.638527501
24718	R04D3.2	WBGene00011010	R04D3.2	35.39326995	6.545369576
24719	R04D3.3	WBGene00011011	R04D3.3	32.00105158	0.825978404
24720	R04D3.4	WBGene00011012	R04D3.4	23.59971645	1.703602236
24778	R05D7.4	WBGene00011029	R05D7.4	21.0258249	19.93109753
24787	R05F9.11	WBGene00019894	R05F9.11	5.811586964	1.46515214
24808	R05H10.3	WBGene00011044	R05H10.3	36.99377469	43.4240025
24833	R06C7.2	WBGene00011062	R06C7.2	1.593857736	0.028576957
24862	R07B7.2	WBGene00011087	R07B7.2	18.96724823	9.878008165
24947	R08D7.2	WBGene00011143	R08D7.2	30.98103487	35.94902052
24979	R09B3.2	WBGene00011155	R09B3.2	317.8024491	108.2654979
25085	R10F2.6	WBGene00019997	R10F2.6	1.816017534	1.440402912
25106	R11A8.1	WBGene00011236	R11A8.1	3.140652169	3.307684618
25107	R11A8.2	WBGene00011237	R11A8.2	62.25958023	76.74296964
25120	R11D1.1	WBGene00011242	R11D1.1	43.41489392	33.8598497
25175	R12E2.1	WBGene00020030	R12E2.1	78.15934595	41.10722208
25182	R12E2.2	WBGene00020031	R12E2.2	45.18933813	6.762413313
25241	R144.10	WBGene00020098	R144.10	29.34999309	39.50458194
25248	R144.3	WBGene00020093	R144.3	39.70945839	29.21945514
25253	R148.4	WBGene00020103	R148.4	2.955940268	0.946552651
25266	R151.2	WBGene00020107	R151.2	268.4519923	351.6427616
25269	R151.7	WBGene00020110	R151.7	61.05157764	37.02259561
25292	R166.2	WBGene00011302	R166.2	47.74196462	34.94215639
25334	R53.5	WBGene00011274	R53.5	41.47048873	57.63354047
25343	R74.8	WBGene00011282	R74.8	69.56753807	34.08774552
25403	T01C3.3	WBGene00011320	T01C3.3	19.73374822	0.421741711
25404	T01C3.9	WBGene00011324	T01C3.9	28.6233522	17.57292544
25433	T01G5.8	WBGene00077585	T01G5.8	0.035154913	0
25440	T01H3.2	WBGene00011348	T01H3.2	49.02156068	28.45308446
25536	T03F6.3	WBGene00011399	T03F6.3	164.162066	308.1509545
25562	T03G11.6	WBGene00020199	T03G11.6	26.34487124	26.06518919
25672	T04H1.2	WBGene00011449	T04H1.2	80.04507414	45.63352946
25730	T05B9.1	WBGene00011464	T05B9.1	197.050338	235.8458973
25769	T05E7.3	WBGene00020259	T05E7.3	50.41514259	43.60657427
25924	T07C4.3	WBGene00011560	T07C4.3	248.0819387	422.0239071
25990	T08B2.11	WBGene00020349	T08B2.11	6.974849599	4.304423567
26013	T08D2.5	WBGene00011610	T08D2.5	0.091667517	0
26015	T08D2.7	WBGene00011612	T08D2.7	1.191641868	0.21678579
26019	T08G11.1	WBGene00011629	T08G11.1	133.7385406	106.2247129
26073	T09B4.2	WBGene00020376	T09B4.2	20.71392462	5.389535055
26086	T09B9.4	WBGene00011645	T09B9.4	45.89368633	51.00519612
26134	T10B11.2	WBGene00020398	T10B11.2	69.30318462	93.6713175
26137	T10B11.6	WBGene00020402	T10B11.6	12.34316666	19.25301771
26138	T10B11.7	WBGene00020403	T10B11.7	55.86538299	43.59312037
26175	T10E9.1	WBGene00020411	T10E9.1	26.88737869	29.2454774
26214	T11F8.1	WBGene00020433	T11F8.1	9.119431123	2.92306007
26267	T12C9.7	WBGene00020461	T12C9.7	4.330639567	1.129252996
26284	T12G3.6	WBGene00011741	T12G3.6	163.3807091	160.8348065
26308	T13F2.6	WBGene00011746	T13F2.6	29.51539624	5.355559542
26344	T14B4.1	WBGene00020498	T14B4.1	49.52398348	33.04375541
26452	T16H12.1	WBGene00011811	T16H12.1	0.579794374	0.25508549
26454	T16H12.2	WBGene00011812	T16H12.2	1.126536714	0.625181773
26455	T16H12.3	WBGene00011813	T16H12.3	11.45294026	7.064763314
26456	T16H12.4	WBGene00011814	T16H12.4	74.84986958	56.34973692
26499	T19B10.8	WBGene00011835	T19B10.8	46.59325665	5.049846264
26572	T19H12.2	WBGene00020588	T19H12.2	1226.658423	2143.782731
26578	T20B12.1	WBGene00020600	T20B12.1	43.20397575	34.17750278
26620	T20F5.5	WBGene00020627	T20F5.5	0.294588041	0.065527459
26622	T20F5.7	WBGene00020629	T20F5.7	75.15287453	116.4851116
26643	T21B10.4	WBGene00011886	T21B10.4	12.61694887	8.736112404
26673	T21C9.13	WBGene00011898	T21C9.13	42.75603607	37.92447574
26678	T21C9.4	WBGene00011892	T21C9.4	50.01305028	73.83821236
26786	T22D1.5	WBGene00020684	T22D1.5	83.26931874	34.6452183
26825	T23B12.6	WBGene00020721	T23B12.6	23.62244901	7.537669116
26894	T23G4.3	WBGene00011959	T23G4.3	23.01685506	20.21088081
26954	T24D1.3	WBGene00011986	T24D1.3	5.943197241	0.732631917
27003	T24H10.4	WBGene00012002	T24H10.4	24.91607595	2.656309608
27006	T24H7.3	WBGene00020782	T24H7.3	35.99241132	76.65371235
27090	T26A5.2	WBGene00020819	T26A5.2	25.8324291	25.88614383
27093	T26A5.8	WBGene00020823	T26A5.8	42.73375619	120.4699595
27094	T26A8.1	WBGene00020824	T26A8.1	48.73102171	11.57900329
27105	T26C12.1	WBGene00020831	T26C12.1	50.07524188	14.11429716
27177	T27A3.6	WBGene00020842	T27A3.6	16.89626246	7.268813291
27178	T27A3.7	WBGene00020843	T27A3.7	25.42281424	28.88793692
27265	T28A8.3	WBGene00012109	T28A8.3	57.98032669	56.7368728
27266	T28A8.4	WBGene00012110	T28A8.4	24.6885007	13.04406238
27267	T28A8.5	WBGene00012111	T28A8.5	18.31889288	18.94430648
27268	T28A8.6	WBGene00012112	T28A8.6	28.58193835	20.77040478
27349	T28D9.4	WBGene00020896	T28D9.4	18.00895895	51.36638766
27390	VF13D12L.3	WBGene00012149	VF13D12L.3	17.36732093	10.89906821
27403	W01A11.1	WBGene00020909	W01A11.1	16.92642471	4.513205454
27418	W01A8.2	WBGene00012164	W01A8.2	1.20751174	0.976478806
27503	W02D9.4	WBGene00012210	W02D9.4	3.378625335	0.723500444
27569	W03F8.4	WBGene00020994	W03F8.4	58.67181339	107.5835947
27603	W03G9.2	WBGene00021014	W03G9.2	24.96598671	25.64555205
27613	W04A4.5	WBGene00012234	W04A4.5	69.86662397	61.57135079
27629	W04C9.2	WBGene00021024	W04C9.2	25.90185159	32.26234841
27708	W05F2.3	WBGene00021035	W05F2.3	67.43480326	1.478387936
27710	W05F2.6	WBGene00021038	W05F2.6	42.98442735	40.52071494
27730	W06A11.4	WBGene00021055	W06A11.4	3.435204023	0.993225894
27751	W06B4.1	WBGene00021056	W06B4.1	110.9668731	103.036633
27752	W06B4.2	WBGene00021057	W06B4.2	31.09467291	31.75315523
27753	W06D11.1	WBGene00012299	W06D11.1	17.8685065	28.04838684
27794	W07A8.2	WBGene00012319	W07A8.2	73.54303122	53.7725398
27804	W07E6.5	WBGene00021076	W07E6.5	1.146311975	0.455069226
27866	W09B7.2	WBGene00021107	W09B7.2	0	0
27902	W09G12.9	WBGene00021123	W09G12.9	0.973640631	0.142884787
27963	Y102A5C.2	WBGene00013611	Y102A5C.2	1.081652368	1.302600242
27969	Y102E9.2	WBGene00022420	Y102E9.2	113.8790927	169.5195166
28032	Y105E8A.14	WBGene00013674	Y105E8A.14	75.15610463	97.28999497
28034	Y105E8A.2	WBGene00013667	Y105E8A.2	28.0364013	13.09157148
28036	Y105E8A.21	WBGene00013679	Y105E8A.21	155.3775885	148.2001588
28058	Y105E8A.8	WBGene00013669	Y105E8A.8	49.23345868	48.92082809
28064	Y105E8B.6	WBGene00013691	Y105E8B.6	10.41801254	24.18971925
28097	Y106G6H.5	WBGene00013718	Y106G6H.5	61.35708542	17.76372097
28099	Y106G6H.8	WBGene00013720	Y106G6H.8	12.80897522	28.12476285
28106	Y10G11A.1	WBGene00012423	Y10G11A.1	29.28865971	42.44839861
28125	Y110A2AR.1	WBGene00022452	Y110A2AR.1	40.56256303	6.131021852
28128	Y110A7A.19	WBGene00022464	Y110A7A.19	45.64152554	33.42555043
28134	Y111B2A.1	WBGene00013727	Y111B2A.1	5.39120597	2.750840395
28143	Y111B2A.3	WBGene00013729	Y111B2A.3	47.3983339	28.99689508
28180	Y116A8C.13	WBGene00013792	Y116A8C.13	30.1853837	30.50493258
28247	Y11D7A.7	WBGene00012431	Y11D7A.7	18.41760095	28.94154146
28261	Y14H12B.2	WBGene00021192	Y14H12B.2	70.15753263	103.3663895
28317	Y17G9B.5	WBGene00021202	Y17G9B.5	55.47488409	53.34112855
28319	Y17G9B.9	WBGene00021206	Y17G9B.9	13.16444865	6.539434718
28320	Y18D10A.11	WBGene00012481	Y18D10A.11	48.66972648	16.92149722
28340	Y18H1A.7	WBGene00021211	Y18H1A.7	11.45364115	10.09895324
28380	Y22D7AL.7	WBGene00021246	Y22D7AL.7	13.75149043	19.08308695
28460	Y32B12B.4	WBGene00012524	Y32B12B.4	41.0614549	32.57893144
28484	Y32H12A.7	WBGene00021315	Y32H12A.7	26.5659861	12.43690328
28502	Y34D9A.3	WBGene00021329	Y34D9A.3	60.75208862	43.65799984
28509	Y34F4.5	WBGene00021340	Y34F4.5	2.718851146	1.391196171
28535	Y37D8A.2	WBGene00012544	Y37D8A.2	10.93090611	9.155690258
28541	Y37D8A.4	WBGene00012546	Y37D8A.4	95.96682697	146.4441025
28568	Y37E11B.6	WBGene00021378	Y37E11B.6	24.97980896	14.16120892
28574	Y37E3.17	WBGene00021355	Y37E3.17	111.3011678	97.10382262
28599	Y37H2A.1	WBGene00012562	Y37H2A.1	36.73066446	26.70190127
28602	Y37H2A.12	WBGene00044758	Y37H2A.12	4.086574669	3.482881044
28607	Y37H2A.7	WBGene00012567	Y37H2A.7	0.15220618	0.131054918
28710	Y38H8A.7	WBGene00012640	Y38H8A.7	3.76508242	1.642825335
28719	Y39A1A.22	WBGene00012659	Y39A1A.22	47.15805732	14.96258434
28742	Y39A3CL.1	WBGene00021440	Y39A3CL.1	37.41431906	27.28662125
28761	Y39B6A.13	WBGene00012675	Y39B6A.13	28.54756328	15.34231208
28762	Y39B6A.16	WBGene00012678	Y39B6A.16	3.8929827	1.531918865
28773	Y39B6A.37	WBGene00012695	Y39B6A.37	48.05588749	43.68380576
28776	Y39B6A.42	WBGene00012700	Y39B6A.42	8.724301219	5.080382334
28815	Y39F10B.1	WBGene00021456	Y39F10B.1	22.28421247	18.34191659
28832	Y39G10AR.7	WBGene00021465	Y39G10AR.7	7.211094471	3.869667686
28925	Y41C4A.9	WBGene00012756	Y41C4A.9	69.30007605	48.7113246
28929	Y41D4A.5	WBGene00021507	Y41D4A.5	84.28765341	65.74885929
28986	Y42H9B.3	WBGene00021541	Y42H9B.3	84.17681593	94.16668459
28994	Y43B11AR.3	WBGene00021544	Y43B11AR.3	10.00847374	3.231953081
29006	Y43D4A.4	WBGene00012790	Y43D4A.4	0	0
29010	Y43E12A.3	WBGene00012795	Y43E12A.3	0.172804943	0.939473339
29117	Y45F3A.9	WBGene00012864	Y45F3A.9	9.74857802	10.40352207
29130	Y45G5AM.2	WBGene00021555	Y45G5AM.2	24.72859855	14.46086052
29183	Y46H3C.6	WBGene00021606	Y46H3C.6	0.144210155	2.119022565
29188	Y47A7.1	WBGene00021613	Y47A7.1	31.16033317	23.72465068
29244	Y47G6A.22	WBGene00021647	Y47G6A.22	15.89629299	20.75539695
29245	Y47G6A.25	WBGene00021649	Y47G6A.25	15.22436288	6.195901314
29259	Y47G6A.9	WBGene00021638	Y47G6A.9	33.79477014	41.82816861
29260	Y47G7B.2	WBGene00021654	Y47G7B.2	1.254529274	0.915868566
29279	Y47H9C.8	WBGene00012951	Y47H9C.8	68.83308255	62.9866366
29281	Y48A5A.1	WBGene00021655	Y48A5A.1	25.52057391	26.94066781
29298	Y48B6A.10	WBGene00012981	Y48B6A.10	0.952863597	1.36045712
29317	Y48E1B.2	WBGene00013001	Y48E1B.2	56.13398833	23.17000135
29320	Y48E1C.1	WBGene00013014	Y48E1C.1	37.66798326	18.8757261
29321	Y48E1C.2	WBGene00013015	Y48E1C.2	22.49987797	24.43496854
29324	Y48G10A.2	WBGene00013019	Y48G10A.2	71.61278131	103.5442383
29326	Y48G10A.4	WBGene00013021	Y48G10A.4	77.46905791	69.2110183
29329	Y48G1A.1	WBGene00021657	Y48G1A.1	7.6727735	3.620736918
29330	Y48G1A.2	WBGene00021658	Y48G1A.2	13.39283403	5.606857147
29336	Y48G1C.1	WBGene00021676	Y48G1C.1	63.25191057	66.47484259
29347	Y48G8AL.15	WBGene00021692	Y48G8AL.15	5.753530978	3.429238421
29353	Y48G8AL.7	WBGene00021687	Y48G8AL.7	18.77384251	14.6751509
29360	Y48G9A.11	WBGene00021704	Y48G9A.11	2.144699606	3.597725177
29384	Y49F6A.5	WBGene00021713	Y49F6A.5	2.098730023	1.741625343
29402	Y49G5B.1	WBGene00021732	Y49G5B.1	13.68363675	2.829713583
29408	Y4C6A.3	WBGene00021153	Y4C6A.3	10.50429902	11.80950621
29420	Y50D4A.1	WBGene00021735	Y50D4A.1	77.34261352	21.88945018
29436	Y50D4C.3	WBGene00021748	Y50D4C.3	30.75934186	32.58332748
29438	Y50D4C.6	WBGene00021750	Y50D4C.6	10.11059226	15.6742718
29441	Y50D7A.11	WBGene00021759	Y50D7A.11	26.44141318	27.57540743
29453	Y50E8A.12	WBGene00013055	Y50E8A.12	0.466214371	0
29506	Y51F10.2	WBGene00021763	Y51F10.2	163.9925685	124.0967997
29508	Y51F10.4	WBGene00021765	Y51F10.4	20.01433934	8.245347063
29588	Y52E8A.2	WBGene00021795	Y52E8A.2	29.26710782	39.42892578
29643	Y53F4B.5	WBGene00013152	Y53F4B.5	0.084796952	1.489459876
29692	Y54E10A.11	WBGene00021831	Y54E10A.11	61.39750357	71.10016905
29693	Y54E10A.12	WBGene00021832	Y54E10A.12	14.94625644	7.636154449
29716	Y54E2A.8	WBGene00013193	Y54E2A.8	6.125884103	1.870628099
29729	Y54F10AM.5	WBGene00021849	Y54F10AM.5	96.56183931	133.6790186
29732	Y54F10AR.1	WBGene00021854	Y54F10AR.1	29.05732049	50.08483221
29733	Y54F10AR.2	WBGene00021855	Y54F10AR.2	18.48367786	8.438418148
29741	Y54G11A.1	WBGene00013212	Y54G11A.1	27.89759232	7.604475687
29743	Y54G11A.14	WBGene00013221	Y54G11A.14	0.552948864	1.28947614
29748	Y54G11A.3	WBGene00013214	Y54G11A.3	64.70073159	59.88089836
29754	Y54G2A.12	WBGene00021877	Y54G2A.12	14.01275851	13.10986643
29763	Y54G2A.27	WBGene00021891	Y54G2A.27	0.017387725	0.083623745
29764	Y54G2A.28	WBGene00021892	Y54G2A.28	0.149048294	0.028576957
29808	Y54G9A.5	WBGene00013208	Y54G9A.5	17.12790481	4.911342392
29809	Y54G9A.7	WBGene00013210	Y54G9A.7	22.53478963	16.8650029
29831	Y55D9A.2	WBGene00013224	Y55D9A.2	83.62082907	95.92302429
29835	Y55F3AM.14	WBGene00021931	Y55F3AM.14	0.27871817	0.159631875
29839	Y55F3AM.5	WBGene00021923	Y55F3AM.5	18.18492824	16.22640531
29841	Y55F3AM.9	WBGene00021926	Y55F3AM.9	34.39672578	33.88630186
29849	Y55F3BR.1	WBGene00021938	Y55F3BR.1	134.8934324	170.1077168
29859	Y55F3BR.6	WBGene00021943	Y55F3BR.6	8.993055945	4.956130135
29868	Y56A3A.11	WBGene00013231	Y56A3A.11	34.27475683	32.87305336
29876	Y56A3A.31	WBGene00013243	Y56A3A.31	29.18116648	34.01770777
29884	Y57A10A.1	WBGene00013246	Y57A10A.1	5.516149558	4.045715091
29888	Y57A10A.2	WBGene00013247	Y57A10A.2	4.639821453	3.228441789
29895	Y57A10A.3	WBGene00013248	Y57A10A.3	1.186097956	0.786162846
29896	Y57A10A.31	WBGene00013270	Y57A10A.31	97.29974259	66.2178247
29899	Y57A10A.4	WBGene00013249	Y57A10A.4	0.859810396	0.11430783
29902	Y57A10A.5	WBGene00013250	Y57A10A.5	9.126876484	5.459221802
29903	Y57A10A.7	WBGene00013252	Y57A10A.7	3.669706337	3.335725273
29904	Y57A10A.8	WBGene00013253	Y57A10A.8	42.38376492	43.65284508
29919	Y57E12AL.6	WBGene00021959	Y57E12AL.6	136.6558218	270.4219771
29982	Y57G11C.499	WBGene00077762	Y57G11C.499	0.043408223	2.369357497
29984	Y57G11C.51	WBGene00044258	Y57G11C.51	1.227094291	1.730072066
30010	Y59A8B.12	WBGene00013349	Y59A8B.12	32.91447275	43.09840499
30012	Y59A8B.21	WBGene00013353	Y59A8B.21	5.815629226	0.365936994
30089	Y62E10A.14	WBGene00013380	Y62E10A.14	14.01307539	1.710626582
30132	Y65A5A.2	WBGene00013419	Y65A5A.2	9.848991671	2.559175237
30150	Y65B4BL.3	WBGene00022035	Y65B4BL.3	5.234398953	3.220549582
30151	Y65B4BL.4	WBGene00022036	Y65B4BL.4	11.53858244	19.58756589
30180	Y66D12A.16	WBGene00013442	Y66D12A.16	3.682290189	3.330919749
30181	Y66D12A.19	WBGene00013445	Y66D12A.19	50.11136503	86.98064133
30190	Y66D12A.6	WBGene00013432	Y66D12A.6	7.513695091	11.06439388
30215	Y67D2.3	WBGene00022053	Y67D2.3	66.24216636	68.17258887
30217	Y67D2.5	WBGene00022055	Y67D2.5	8.266409689	5.934511325
30218	Y67D2.6	WBGene00022056	Y67D2.6	44.80538631	46.91189734
30244	Y67D8C.3	WBGene00022067	Y67D8C.3	32.95499975	31.87570802
30251	Y67H2A.7	WBGene00013464	Y67H2A.7	21.83681363	10.19436701
30258	Y69A2AR.16	WBGene00022087	Y69A2AR.16	186.138187	183.2150231
30269	Y69A2AR.32	WBGene00022101	Y69A2AR.32	5.261034787	3.306557047
30316	Y6B3B.1	WBGene00012387	Y6B3B.1	0.53720117	0.138670532
30385	Y71F9AL.8	WBGene00022113	Y71F9AL.8	3.511582659	2.1309074
30459	Y71H2AM.9	WBGene00022174	Y71H2AM.9	13.67084994	7.145002583
30463	Y71H2B.11	WBGene00022198	Y71H2B.11	1.848306194	0.70405496
30465	Y71H2B.2	WBGene00022192	Y71H2B.2	114.8883709	165.9675186
30467	Y71H2B.5	WBGene00022195	Y71H2B.5	50.63128119	41.94160682
30479	Y73B3A.1	WBGene00022203	Y73B3A.1	39.73427284	29.5611961
30480	Y73B3A.10	WBGene00022212	Y73B3A.10	1.262625728	0.065527459
30483	Y73B3A.16	WBGene00022218	Y73B3A.16	0.043787687	0
30493	Y73B3A.3	WBGene00022205	Y73B3A.3	0.381160133	0
30499	Y73B3A.9	WBGene00022211	Y73B3A.9	1.929857428	0.065527459
30510	Y73B6BL.23	WBGene00022244	Y73B6BL.23	17.08302769	5.025058954
30537	Y73B6BL.4	WBGene00022233	Y73B6BL.4	35.38024848	27.6288249
30579	Y73F8A.24	WBGene00013529	Y73F8A.24	28.25633206	26.79909414
30609	Y75B8A.14	WBGene00013550	Y75B8A.14	41.96105644	32.98834251
30610	Y75B8A.16	WBGene00013551	Y75B8A.16	13.26996852	3.529813997
30618	Y75B8A.31	WBGene00013561	Y75B8A.31	57.67792785	57.29904373
30639	Y75D11A.3	WBGene00022292	Y75D11A.3	3.614609648	1.731957567
30652	Y76B12C.6	WBGene00022300	Y76B12C.6	85.88407703	110.5990342
30738	Y82E9BR.18	WBGene00022350	Y82E9BR.18	60.77965804	55.69056099
30739	Y82E9BR.19	WBGene00022351	Y82E9BR.19	8.816965806	13.4311105
30740	Y82E9BR.2	WBGene00022335	Y82E9BR.2	3.74374916	0.590338399
30750	Y82E9BR.3	WBGene00022336	Y82E9BR.3	355.7578537	618.1980912
30769	Y87G2A.7	WBGene00013596	Y87G2A.7	77.25188002	67.31570651
30790	Y92H12BR.7	WBGene00022372	Y92H12BR.7	28.37183714	17.81115038
30803	Y94H6A.8	WBGene00022380	Y94H6A.8	71.41552019	78.86864417
30875	ZC155.4	WBGene00022532	ZC155.4	39.75690661	2.46226073
30963	ZC317.7	WBGene00022590	ZC317.7	1.747581769	0.831486891
31014	ZC434.4	WBGene00013892	ZC434.4	83.54291008	72.4101136
31016	ZC434.8	WBGene00013894	ZC434.8	159.7644221	163.9923001
31044	ZC477.5	WBGene00022620	ZC477.5	49.48467904	46.90951459
31083	ZC53.1	WBGene00022508	ZC53.1	7.809268017	2.688454586
31131	ZK1010.2	WBGene00014176	ZK1010.2	19.26248662	8.687513814
31168	ZK1067.2	WBGene00014208	ZK1067.2	62.77444219	37.5051107
31198	ZK1128.4	WBGene00014230	ZK1128.4	32.66078428	32.56225189
31216	ZK1236.1	WBGene00022862	ZK1236.1	10.42173956	3.917098859
31230	ZK1248.15	WBGene00022883	ZK1248.15	20.65622814	7.009236953
31259	ZK1307.9	WBGene00014250	ZK1307.9	55.64669157	42.41394432
31270	ZK1320.9	WBGene00014258	ZK1320.9	21.88555812	20.61565204
31284	ZK177.8	WBGene00022673	ZK177.8	36.13946402	25.85008592
31384	ZK370.8	WBGene00022722	ZK370.8	30.21093598	20.75857668
31443	ZK402.5	WBGene00022731	ZK402.5	0.19266065	0
31541	ZK616.5	WBGene00022775	ZK616.5	10.80792661	3.331234425
31575	ZK632.11	WBGene00014018	ZK632.11	55.31452284	54.78824114
31582	ZK632.2	WBGene00014011	ZK632.2	136.2613406	175.5645174
31585	ZK632.9	WBGene00014016	ZK632.9	60.53959048	105.5851662
31590	ZK637.2	WBGene00014022	ZK637.2	36.08073449	20.22542772
31692	ZK795.3	WBGene00014083	ZK795.3	73.54593154	104.8447064
31702	ZK809.5	WBGene00014087	ZK809.5	56.10277958	21.01377034
31777	ZK858.5	WBGene00014118	ZK858.5	14.10712077	6.362114281
31786	ZK863.4	WBGene00014124	ZK863.4	185.3396333	167.8323876
31854	ZK945.4	WBGene00014166	ZK945.4	4.642208578	2.33926468
31863	ZK973.1	WBGene00022830	ZK973.1	73.05266355	38.53796684
31895	PAR2.3	WBGene00019801	aak-1	7.982771425	7.136685768
31903	R53.7	WBGene00011276	aakg-5	26.69643138	11.55244041
31917	F18E2.2	WBGene00006512	abcf-1	133.2825221	146.9227677
31928	B0336.6	WBGene00015146	abi-1	134.6429636	79.95047151
31955	C44E4.6	WBGene00016655	acbp-1	86.71451435	98.81812085
31958	T12D8.3	WBGene00011731	acbp-5	27.10757544	21.44976725
31972	Y45F3A.3	WBGene00012860	acdh-11	78.98845545	85.26192586
31976	K06A5.6	WBGene00019433	acdh-3	225.0943853	290.6510534
31997	F08F3.2	WBGene00017261	acl-6	43.02320967	13.13328766
32002	B0365.1	WBGene00007150	acly-2	26.80419741	16.25235572
32037	F41C3.3	WBGene00018269	acs-11	25.60194301	26.9826109
32045	C36A4.9	WBGene00007969	acs-19	78.63551927	24.12485314
32057	T04C12.5	WBGene00000064	act-2	741.3204974	1826.934416
32123	F54D8.3	WBGene00000107	alh-1	90.97633772	97.94255196
32141	F23B2.6	WBGene00000121	aly-2	396.9431703	505.4627688
32156	C17H12.13	WBGene00015938	anat-1	41.07605794	55.7139991
32158	W02G9.5	WBGene00020955	angl-1	21.67141055	21.13972194
32160	K10B2.5	WBGene00019608	ani-2	58.95390111	34.43260339
32161	Y43F8C.14	WBGene00012835	ani-3	23.57434244	14.11431405
32230	F15H10.3	WBGene00000144	apc-10	14.66922121	9.671593114
32233	K06H7.6	WBGene00000143	apc-2	100.8611696	120.5711655
32243	W03G9.4	WBGene00000155	app-1	184.3443325	240.5740321
32250	Y62E10A.17	WBGene00013383	aptf-2	204.6431483	332.3259254
32251	F28C6.2	WBGene00009203	aptf-3	13.460034	24.90473445
32253	K08D9.3	WBGene00000168	apx-1	17.94744739	5.582439479
32291	R06B9.3	WBGene00011054	arrd-13	10.01568204	2.857642543
32301	T20D4.6	WBGene00020612	arrd-22	1.595014935	2.860176041
32324	F35G12.10	WBGene00000206	asb-1	145.185625	174.3215329
32326	Y53F4B.15	WBGene00000208	asc-1	59.01001696	45.0997378
32329	C03D6.5	WBGene00007277	asfl-1	33.94478298	14.67894231
32388	C44B9.4	WBGene00008081	athp-1	87.99506226	58.549614
32389	H20J04.2	WBGene00019217	athp-2	106.8466977	98.0059613
32399	T05H4.12	WBGene00020275	atp-4	95.93576932	179.1466703
32405	Y18D10A.1	WBGene00012474	attf-6	101.9299739	73.79140093
32407	F28F8.6	WBGene00006446	atx-3	42.29244306	41.67626326
32413	F57B10.11	WBGene00000236	bag-1	63.77864934	110.9117088
32419	F59H6.9	WBGene00019139	bath-1	7.906189324	11.1803487
32421	F40B1.1	WBGene00018223	bath-13	0.124423472	0.757585888
32423	F59H6.1	WBGene00019132	bath-19	0.264162021	0.251629164
32424	F52C6.11	WBGene00018668	bath-2	21.33519497	28.32770645
32425	B0047.1	WBGene00015012	bath-20	0.389899214	4.699435738
32426	F59H6.8	WBGene00019138	bath-21	2.262780015	2.695793608
32428	B0047.3	WBGene00015014	bath-24	1.448842886	1.873493156
32431	F14D2.1	WBGene00017450	bath-27	5.536419741	2.845702741
32432	F14D2.13	WBGene00017461	bath-28	10.82977595	14.10344861
32433	F14D2.4	WBGene00017452	bath-29	9.018599567	4.390154439
32434	F59H6.10	WBGene00019140	bath-3	1.111059237	0.825220475
32435	F14D2.12	WBGene00017460	bath-30	18.27193555	7.630795739
32438	W02A11.5	WBGene00012195	bath-34	1.554247086	2.667752953
32439	W02A11.8	WBGene00012196	bath-35	0.272293153	0.497528214
32444	F52C6.8	WBGene00018665	bath-4	11.04073397	10.41745907
32450	F29C12.5	WBGene00009247	bath-45	0.596614373	4.688733439
32453	F59H6.11	WBGene00019141	bath-5	11.68878852	6.307510748
32454	F52C6.10	WBGene00018667	bath-7	1.910920444	3.348739443
32469	F54C9.6	WBGene00010042	bcs-1	20.90628112	6.833189549
32486	B0564.4	WBGene00007204	best-2	0.016127157	0.275233937
32505	C50B8.2	WBGene00000250	bir-2	17.18117456	17.16508264
32510	K04F10.4	WBGene00000254	bli-4	99.51726737	13.04500641
32514	T20G5.10	WBGene00011872	blos-1	20.13994432	42.19908308
32546	F57C2.2	WBGene00010194	btb-19	7.873249221	1.428091706
32548	F57C2.1	WBGene00010193	btb-20	1.332465653	1.570976494
32550	B0047.2	WBGene00015013	btb-3	0.137217413	0
32551	F59H6.12	WBGene00019142	btb-4	2.562919356	2.071203104
32558	F15D4.1	WBGene00000274	btf-1	127.0012405	76.11914416
32604	C18E3.6	WBGene00015975	cas-2	26.55672785	21.83927269
32615	W08D2.5	WBGene00012341	catp-6	36.41790495	2.524331863
32620	H02I12.1	WBGene00010351	cbd-1	392.3024635	6.592745783
32633	W05B10.2	WBGene00012277	ccch-3	49.04387006	46.94818746
32645	F56H1.5	WBGene00018995	ccpp-1	68.53368979	35.29239497
32656	F58G11.6	WBGene00010283	ccz-1	25.74998313	19.77967254
32658	K06A5.7	WBGene00000386	cdc-25.1	145.9177698	119.3753956
32669	C34G6.5	WBGene00016421	cdc-7	26.66970452	21.0497032
32710	C50A2.2	WBGene00016796	cec-2	36.87186389	85.88594352
32714	T12E12.2	WBGene00020463	cec-6	83.2731357	84.05025462
32717	C29H12.5	WBGene00016236	cec-9	7.767481094	7.027238427
32723	Y41D4B.13	WBGene00000416	ced-2	65.6407276	63.33640089
32795	Y66A7A.5	WBGene00013425	ceh-91	30.86900807	30.79815542
32796	Y66D12A.5	WBGene00013431	ceh-92	8.042682233	4.810916593
32800	F52B5.5	WBGene00000467	cep-1	53.89714975	51.05523343
32808	F46F11.2	WBGene00000473	cey-2	236.6623209	47.32113192
32809	M01E11.5	WBGene00000474	cey-3	166.5505571	30.80712552
32818	C07H6.5	WBGene00000479	cgh-1	283.2796513	231.6028023
32874	Y60A3A.12	WBGene00000499	chk-2	7.195644364	2.619027548
32879	T25G3.2	WBGene00000496	chs-1	13.04561231	1.508795428
32889	K10D2.3	WBGene00019629	cid-1	187.780609	167.7583968
32912	Y47D3A.4	WBGene00000519	cku-70	98.89924864	93.4898521
33156	C25A1.8	WBGene00007709	clec-87	628.8146945	700.2991288
33157	K10B2.3	WBGene00019606	clec-88	189.1027425	92.1610166
33160	F57C9.2	WBGene00019009	clec-90	4.208076462	0.579266459
33161	ZK858.3	WBGene00014117	clec-91	173.2772748	258.8710827
33179	ZC395.2	WBGene00000536	clk-1	19.62120534	27.55703278
33180	C07H6.6	WBGene00000537	clk-2	20.4007223	11.92235315
33233	R02D3.2	WBGene00019820	cogc-8	138.2101615	126.8769493
33235	F08H9.1	WBGene00000592	coh-3	17.21004644	5.985326974
33236	Y45G5AM.8	WBGene00021560	coh-4	12.43865107	4.912155288
33415	Y71H2AM.7	WBGene00022172	cosa-1	3.466406349	1.493674131
33421	C40H1.1	WBGene00000770	cpb-1	4.349765148	0.339467164
33423	B0414.5	WBGene00000772	cpb-3	74.02645824	78.81190072
33428	C07G2.1	WBGene00000465	cpg-1	264.5950479	3.060326438
33429	B0280.5	WBGene00015102	cpg-2	86.2100798	3.92083354
33430	R06C7.4	WBGene00011063	cpg-3	10.34801264	0.196582377
33431	C10F3.1	WBGene00015677	cpg-4	26.09605848	0.539505866
33439	F43G9.9	WBGene00000777	cpn-1	61.91375347	26.56430864
33454	C41D11.8	WBGene00000787	cps-6	18.99594351	6.111631334
33481	C14A4.4	WBGene00000796	crn-3	150.2611979	159.1865438
33482	AH9.2	WBGene00000797	crn-4	21.67632587	24.09363452
33503	F20D12.1	WBGene00017641	csr-1	31.3816861	23.55849092
33511	Y54G11A.6	WBGene00000830	ctl-1	1.167970113	0
33513	Y54G11A.13	WBGene00013220	ctl-3	3.230378032	7.386412548
33519	Y76A2A.2	WBGene00000834	cua-1	92.71936452	50.79109087
33536	ZK353.7	WBGene00022702	cutc-1	51.35295508	37.0200674
33578	Y43E12A.1	WBGene00000866	cyb-2.1	25.74629047	7.07228588
33579	H31G24.4	WBGene00000867	cyb-2.2	51.05899758	12.24326134
33590	C08C3.4	WBGene00015591	cyk-7	18.72782573	9.893515987
33592	F40F12.5	WBGene00009594	cyld-1	60.29737799	36.87540176
33608	T27D1.1	WBGene00000885	cyn-9	25.20117969	21.59429647
33636	H02I12.8	WBGene00010354	cyp-31A2	4.038743623	0.122681374
33637	Y17G9B.3	WBGene00021200	cyp-31A3	7.154442056	0.122681374
33691	F20D12.4	WBGene00017643	czw-1	250.7623303	320.4398514
33732	F56D1.7	WBGene00000935	daz-1	28.01684482	4.54984128
33796	Y65B4BL.2	WBGene00022034	deps-1	113.7988251	81.05427033
33803	F42A9.1	WBGene00006483	dgk-4	128.8140567	41.41167744
33808	W01A11.2	WBGene00020910	dgtr-1	5.455215562	0.214678663
33824	M18.8	WBGene00010892	dhhc-6	42.77447249	7.397537691
33835	K08F4.9	WBGene00000975	dhs-12	21.99094487	35.23847848
33836	F36H9.3	WBGene00000976	dhs-13	86.25708178	170.058205
33872	F48E8.6	WBGene00018612	disl-2	66.24823564	106.2706672
33874	B0432.2	WBGene00015184	djr-1.1	76.46857193	98.99926373
33878	F23B12.5	WBGene00009082	dlat-1	90.6518546	122.4351247
33879	T26A5.9	WBGene00001005	dlc-1	170.0042291	351.1876572
33885	LLC1.3	WBGene00010794	dld-1	75.53738635	86.2517973
33918	F43G6.1	WBGene00001016	dna-2	116.6046633	77.49625805
33927	F38A5.13	WBGene00001029	dnj-11	365.1311376	554.1994868
33939	T23B12.7	WBGene00001040	dnj-22	71.92727914	58.21123963
33943	Y39C12A.8	WBGene00001044	dnj-26	4.189971208	3.30871914
33945	Y54E10BL.4	WBGene00001046	dnj-28	11.4773113	5.128016487
33965	F33H2.1	WBGene00001049	dog-1	72.81712278	43.8456174
33967	F54C1.2	WBGene00001050	dom-3	26.81436679	28.28371472
33986	K02F2.1	WBGene00001056	dpf-3	330.8039699	432.2796627
34029	F15B10.2	WBGene00001090	drh-1	62.27767104	57.21620639
34030	D2005.5	WBGene00008400	drh-3	123.0300317	132.743467
34038	F08G5.1	WBGene00008580	dsb-1	27.12546194	29.55716539
34040	Y106G6A.5	WBGene00013697	dsbn-1	52.34631951	94.86504223
34054	Y106G6H.12	WBGene00001112	duo-3	56.52636028	63.98632836
34057	K07A1.2	WBGene00010609	dut-1	661.701511	1048.781247
34059	T19B10.6	WBGene00011834	dvc-1	58.65875038	33.23860383
34082	D1007.16	WBGene00017011	eaf-1	104.8503299	162.0738722
34112	R05D11.8	WBGene00011036	edc-3	108.3234173	156.9803887
34116	F54H12.6	WBGene00018846	eef-1B.1	452.9844118	207.6155708
34118	F17C11.9	WBGene00008920	eef-1G	868.2863334	205.7358538
34138	B0244.8	WBGene00015083	egg-1	13.98682901	0.290686793
34139	R01H2.3	WBGene00019811	egg-2	11.13166195	1.136646984
34140	F44F4.2	WBGene00009701	egg-3	48.01429325	6.488695234
34141	T21E3.1	WBGene00020652	egg-4	13.08998267	1.366778502
34142	R12E2.10	WBGene00020035	egg-5	12.47132952	0.998198078
34143	K07A12.2	WBGene00010621	egg-6	43.29997714	2.933485775
34171	F26A3.3	WBGene00001214	ego-1	35.64249729	6.622891802
34174	Y55F3AM.7	WBGene00043705	egrh-2	2.014267864	1.21006665
34188	Y74C10AR.1	WBGene00001232	eif-3.I	144.0141735	161.6093186
34192	F22D6.6	WBGene00009052	ekl-1	99.66468079	124.27498
34214	Y111B2A.17	WBGene00013738	elpc-2	56.92168462	45.84105794
34228	K10D2.6	WBGene00001262	emb-8	39.20522052	20.89247624
34235	F56A6.4	WBGene00018923	eme-1	32.03392739	36.3306524
34243	K10C3.2	WBGene00010730	ensa-1	121.0636334	181.1396173
34244	ZK809.4	WBGene00001320	ent-1	69.70476797	67.4076781
34248	F16H11.3	WBGene00017532	ent-5	5.22622172	0.347840708
34253	W03G9.3	WBGene00021015	enu-3.3	0.422548862	0.057153915
34254	W05F2.2	WBGene00021034	enu-3.4	0.080635785	0
34266	Y106G6A.2	WBGene00013695	epg-8	9.527928689	33.85291664
34278	T07A9.5	WBGene00001332	eri-1	85.52622852	76.38954331
34284	C26E6.7	WBGene00016143	eri-9	70.56861351	53.29709266
34285	C42C1.15	WBGene00016592	erl-1	9.244664088	3.428425525
34310	F26H11.5	WBGene00001371	exl-1	14.9469062	6.268784678
34311	F45G2.3	WBGene00009731	exo-1	49.62483892	43.46682051
34330	Y56A3A.12	WBGene00013232	faah-4	95.74470203	66.27219069
34335	C01G5.8	WBGene00015310	fan-1	46.47761784	35.9138395
34350	Y67H2A.8	WBGene00001393	fat-1	83.88642589	8.730067614
34358	H12I13.4	WBGene00001401	fbf-1	6.203641193	1.545319559
34359	F21H12.5	WBGene00001402	fbf-2	2.330020964	0.659267217
34366	F08A8.7	WBGene00008569	fbxa-101	19.41666669	19.46745531
34371	Y59A8B.11	WBGene00013348	fbxa-106	0.789083822	0.326879365
34372	Y37H2A.4	WBGene00012564	fbxa-107	6.912924567	3.132008618
34373	F59A1.7	WBGene00010293	fbxa-108	6.739108114	2.303386784
34378	Y113G7B.7	WBGene00013758	fbxa-114	7.684634947	12.75088194
34403	F48C1.2	WBGene00018595	fbxa-145	1.860614363	2.574406466
34448	T06C12.4	WBGene00011513	fbxa-197	0.967432677	0.265566161
34455	W05F2.5	WBGene00021037	fbxa-203	0.297175262	0.179835289
34456	Y102A5C.1	WBGene00013610	fbxa-206	16.126332	11.97791504
34460	Y37H2A.5	WBGene00012565	fbxa-210	49.28223006	64.25731878
34461	Y37H2A.6	WBGene00012566	fbxa-211	0.540465363	0
34464	Y45F10C.3	WBGene00012879	fbxa-215	113.5088239	80.37024859
34545	F28F8.8	WBGene00009225	fbxa-94	0.293327473	0.560948546
34546	F28F8.4	WBGene00009222	fbxa-95	8.928100671	17.26547212
34695	C16A11.9	WBGene00045297	fbxc-43	0.307745575	1.002948636
34696	C16A11.6	WBGene00015819	fbxc-44	18.87092487	20.73013006
34697	Y54G2A.22	WBGene00021887	fbxc-45	4.318696833	5.081509905
34698	M02B7.1	WBGene00019723	fbxc-47	0.634861086	1.964899176
34717	K07G5.6	WBGene00010645	fecl-1	32.44060561	15.84185261
34719	F35D6.1	WBGene00001411	fem-1	53.06018888	22.46365316
34720	T19C3.8	WBGene00001412	fem-2	78.11675861	63.25126147
34721	C01F6.4	WBGene00001413	fem-3	2.651431593	6.997295389
34728	ZK593.8	WBGene00014004	fic-1	35.08558493	9.982906165
34789	R53.1	WBGene00011271	flad-1	49.05544225	43.1997544
34841	F56A3.1	WBGene00018908	fncm-1	17.41497915	24.07237793
34844	Y54E10A.4	WBGene00001481	fog-1	6.509331009	1.949446321
34845	Y113G7B.5	WBGene00001482	fog-2	14.65678287	13.91849136
34846	C03C11.2	WBGene00001483	fog-3	0.441887058	0.527675997
34852	K01B6.1	WBGene00010453	fozi-1	1.0957471	0.936126945
34865	C24A11.8	WBGene00001491	frm-4	76.53176023	73.93831291
34894	Y113G7B.4	WBGene00013756	ftr-1	5.715027391	5.27825718
34900	F59E12.13	WBGene00006402	fut-3	34.30602818	5.563861856
34909	T05H4.14	WBGene00001513	gad-1	266.0864135	333.9489671
34922	Y20F4.3	WBGene00021238	gap-3	26.08779751	12.25448129
34948	F37B12.2	WBGene00001527	gcs-1	84.05349431	110.1368731
34983	ZK829.4	WBGene00014095	gdh-1	141.6948962	66.19641301
34988	K01C8.5	WBGene00001571	gei-14	12.56566102	4.200003377
35003	F22B3.4	WBGene00009035	gfat-2	3.315317146	0.742890962
35008	F29C12.4	WBGene00009246	gfm-1	54.42691186	18.25488796
35016	C45G3.5	WBGene00044008	gip-2	91.77502038	139.956347
35020	T02E1.3	WBGene00011376	gla-3	31.24427249	40.43588216
35064	T23G11.3	WBGene00001595	gld-1	118.5158355	69.59527042
35066	T07F8.3	WBGene00001597	gld-3	195.4001767	288.912115
35067	ZK858.1	WBGene00014115	gld-4	300.1275778	302.3900237
35069	T21G5.3	WBGene00001598	glh-1	48.84224786	58.54156492
35070	C55B7.1	WBGene00001599	glh-2	25.82765175	14.25313612
35071	B0414.6	WBGene00001600	glh-3	44.39577441	39.07359451
35072	T12F5.3	WBGene00001601	glh-4	43.97750884	42.4473845
35077	F26D10.10	WBGene00001606	gln-5	24.49929703	3.709222915
35078	C28D4.3	WBGene00001607	gln-6	204.7163955	110.8204588
35086	C16C10.10	WBGene00006448	glod-4	47.11889121	67.82391133
35087	F02A9.6	WBGene00001609	glp-1	90.56001313	23.95923752
35098	C07G1.8	WBGene00044608	glrx-22	30.53903216	53.85603144
35113	M01F1.1	WBGene00001639	gly-14	0.952011293	0.273939705
35120	C03E10.4	WBGene00001645	gly-20	38.21444401	1.476872077
35121	ZK688.8	WBGene00001628	gly-3	34.47553408	5.113488222
35133	M106.4	WBGene00010912	gmps-1	104.7337424	72.06687641
35135	T23G11.2	WBGene00001647	gna-2	45.17725525	25.24813928
35151	C34E10.1	WBGene00001662	gop-3	101.4095736	64.3375606
35166	Y95B8A.5	WBGene00001678	gpa-16	43.33918972	76.27376577
35183	T09F3.3	WBGene00001683	gpd-1	127.3251977	132.7548617
35186	F33H1.2	WBGene00001686	gpd-4	55.09578051	63.5791575
35201	F30F8.3	WBGene00009272	gras-1	30.01169322	15.65471815
35254	ZC395.6	WBGene00001740	gro-1	20.79269021	26.39781555
35268	B0035.5	WBGene00007108	gspd-1	35.96849366	68.81033706
35271	R107.7	WBGene00001749	gst-1	84.90849223	85.62393656
35320	Y46G5A.31	WBGene00001793	gsy-1	26.02910419	5.938873595
35337	F57A10.3	WBGene00001813	haf-3	51.38302212	39.90441907
35343	T16H12.11	WBGene00011819	hal-2	38.66542791	44.24699001
35350	T24D1.5	WBGene00011988	har-2	24.82180988	5.818244382
35379	Y48G8AL.1	WBGene00021685	herc-1	87.23033056	73.77131905
35383	Y51F10.5	WBGene00021766	hex-4	24.03539099	8.270064287
35396	C18G1.5	WBGene00001855	hil-4	172.422944	268.8467088
35397	B0414.3	WBGene00001856	hil-5	256.2534127	492.87567
35404	T09E8.2	WBGene00001874	him-17	186.6958972	149.7715503
35405	T04A8.15	WBGene00011415	him-18	49.28088777	40.04041356
35406	Y95B8A.11	WBGene00022390	him-19	5.006696751	2.899178704
35407	ZK381.1	WBGene00001862	him-3	23.15257048	3.733492569
35409	D1086.4	WBGene00001864	him-5	6.409803673	4.831932902
35411	T07G12.12	WBGene00001867	him-8	16.02289743	9.152826964
35485	W05B10.1	WBGene00012276	his-74	46.42714263	70.49325551
35488	T28F3.3	WBGene00044067	hke-4.1	24.95835381	0.802097038
35520	Y17G7A.1	WBGene00001977	hmg-12	114.8504549	84.44895709
35521	W02D9.3	WBGene00012209	hmg-20	13.93790938	23.74723782
35522	C32F10.5	WBGene00001973	hmg-3	67.73093286	60.96930127
35536	E04A4.4	WBGene00001983	hoe-1	111.3734869	68.62127372
35539	C18E3.8	WBGene00001985	hop-1	8.948554491	3.129420154
35566	Y110A2AL.12	WBGene00022447	hpo-20	7.535383266	5.61317853
35568	T23D8.7	WBGene00011945	hpo-24	58.25326922	17.91218962
35574	F33D11.9	WBGene00018006	hpo-3	63.03164548	62.1573222
35577	C01G8.6	WBGene00015313	hpo-32	9.204191064	6.448991371
35586	ZK856.12	WBGene00014113	hpo-40	22.83193475	16.02244583
35591	C05C8.6	WBGene00015463	hpo-9	97.10618298	35.34276481
35592	F32A11.2	WBGene00001998	hpr-17	52.64922784	46.24226115
35594	C16C10.3	WBGene00007624	hrde-1	139.3144694	35.59761276
35595	F26E4.11	WBGene00009164	hrdl-1	44.40236689	8.048692837
35640	F41H10.10	WBGene00002032	htp-1	26.42133108	3.234060208
35641	Y73B6BL.2	WBGene00002033	htp-2	26.32052106	6.467695809
35642	F57C9.5	WBGene00002034	htp-3	52.51515572	38.7432969
35653	H26D21.1	WBGene00002042	hus-1	7.702663457	6.236806361
35682	F53A2.6	WBGene00002059	ife-1	118.410259	36.78799365
35686	Y57A10A.30	WBGene00002063	ife-5	4.362481581	1.803751442
35688	T05G5.10	WBGene00002064	iff-1	220.8829798	53.87440882
35700	C27A2.3	WBGene00002068	ify-1	318.2885339	370.6355887
35714	R107.4	WBGene00011299	ikke-1	34.17487077	19.91410057
35723	T19B10.7	WBGene00002072	ima-1	49.88640825	56.44821168
35724	F26B1.3	WBGene00002073	ima-2	169.7665289	33.83395523
35732	W06H3.1	WBGene00012315	immt-2	132.3288302	183.0968402
35733	C36B1.12	WBGene00007979	imp-1	92.44676379	57.34041754
35738	F15B9.4	WBGene00008848	inft-2	84.88037513	58.60035071
35795	Y47G6A.1	WBGene00002143	inx-21	11.29895757	2.005084377
35796	Y47G6A.2	WBGene00002144	inx-22	22.06187302	3.941184969
35803	F57B10.3	WBGene00019001	ipgm-1	18.45559657	9.554325416
35806	C41C4.4	WBGene00002147	ire-1	45.99994124	9.080163464
35918	C10H11.10	WBGene00015698	kca-1	5.581884409	0.769582419
35958	M7.2	WBGene00002214	klc-1	83.21308776	73.53525972
35969	M01E11.6	WBGene00002225	klp-15	18.24258738	7.980318967
35970	C41G7.2	WBGene00002226	klp-16	39.62542632	15.7405776
35972	C06G3.2	WBGene00002228	klp-18	148.4664434	57.9582499
35990	F58D5.4	WBGene00002240	ksr-2	25.60056034	16.04425815
36032	Y40B10A.1	WBGene00021486	lbp-9	62.21842782	44.64054208
36035	K08H10.1	WBGene00002263	lea-1	213.0926823	480.3404137
36073	C29E4.8	WBGene00002879	let-754	50.84737132	59.06218457
36080	K08E7.3	WBGene00002368	let-99	61.52011948	41.79700064
36170	B0001.1	WBGene00003010	lin-24	34.21990254	21.04739662
36186	C12C8.3	WBGene00003026	lin-41	20.11999537	3.65164263
36189	Y73B6A.5	WBGene00003030	lin-45	32.79901824	29.03789573
36197	ZK673.3	WBGene00003038	lin-56	31.24125379	41.30884496
36416	K09H9.6	WBGene00003062	lpd-6	133.2986353	108.4819841
36420	H37A05.1	WBGene00010425	lpin-1	38.37921884	16.36660506
36447	F33G12.4	WBGene00018016	lrr-1	97.69514198	113.5991262
36450	F52F12.4	WBGene00009937	lsl-1	18.17854858	18.00952873
36500	Y55F3BR.5	WBGene00021942	madf-1	2.193930441	2.7343699
36507	C54G6.1	WBGene00016930	madf-6	16.22724747	15.38743139
36508	C46F11.3	WBGene00008118	madf-8	12.74521821	9.405655548
36514	F40E3.2	WBGene00018230	mage-1	47.84973531	45.31330577
36539	F35G2.2	WBGene00009436	marb-1	17.55878079	10.89215556
36542	C17E4.3	WBGene00007643	3-Mar	25.26920273	2.679323113
36618	F32B6.2	WBGene00009319	mccc-1	54.32186323	28.11821808
36621	Y47D3A.28	WBGene00012935	mcm-10	110.3922915	139.8045461
36630	Y19D10A.12	WBGene00021227	mct-1	0	0
36634	T02G5.12	WBGene00020168	mct-5	15.7375741	13.04031258
36636	K02B2.3	WBGene00019296	mcu-1	12.46510286	4.426511909
36639	F46E10.10	WBGene00018491	mdh-1	111.9420705	250.3464203
36651	ZK970.3	WBGene00007022	mdt-22	46.34037644	49.59369643
36666	T01E8.4	WBGene00003177	mec-15	104.7593265	67.0170859
36681	K02B9.1	WBGene00010492	meg-1	138.3709663	174.2350781
36682	K02B9.2	WBGene00010493	meg-2	34.68564699	36.63148046
36684	F57B10.12	WBGene00003184	mei-2	50.76722003	37.07067046
36688	ZK858.4	WBGene00003209	mel-26	127.6416514	236.9071339
36694	Y48B6A.12	WBGene00012983	men-1	63.19022941	58.45733029
36697	R06A4.7	WBGene00003220	mes-2	97.22803242	114.7593703
36701	C28C12.2	WBGene00016178	mesp-1	22.33996877	19.71662283
36706	T07C4.7	WBGene00003225	mev-1	57.22084296	121.9284517
36707	W03C9.7	WBGene00003228	mex-1	130.560664	170.0150405
36709	W02A2.7	WBGene00003230	mex-5	227.7172027	311.9285141
36710	AH6.5	WBGene00003231	mex-6	146.7507647	182.8842715
36715	W02B12.9	WBGene00012204	mfn-1	25.33386114	18.64406008
37016	T28A8.7	WBGene00003373	mlh-1	81.79429411	75.34825336
37041	C26E6.11	WBGene00016144	mmab-1	34.69707858	33.40742214
37042	ZK1058.1	WBGene00014202	mmcm-1	51.65129216	25.82599628
37044	C24G6.3	WBGene00016060	mms-19	67.42814269	53.66687506
37069	F52F12.3	WBGene00003396	mom-4	59.29160217	50.66435406
37072	F11A10.4	WBGene00008685	mon-2	80.54529319	62.35218517
37076	ZC155.3	WBGene00022531	morc-1	121.0845993	145.0122143
37080	ZC410.2	WBGene00013880	mppb-1	23.60791198	22.73077327
37098	ZC302.1	WBGene00003405	mre-11	86.02052268	115.5305313
37106	Y43F8C.12	WBGene00003413	mrp-7	49.02264429	14.43555811
37109	K01C8.6	WBGene00010458	mrpl-10	39.86681567	48.69578301
37126	W04B5.4	WBGene00021021	mrpl-30	25.76251923	29.46987881
37130	K11H3.6	WBGene00010783	mrpl-36	20.08390689	27.40721591
37132	Y34D9A.1	WBGene00021327	mrpl-38	62.11591028	43.92661284
37135	F54C4.1	WBGene00018793	mrpl-40	71.32516834	38.90058314
37151	T01E8.6	WBGene00011334	mrps-14	45.63447277	30.9444983
37156	T13H5.5	WBGene00011759	mrps-18B	44.61052498	31.77729454
37176	F39H2.5	WBGene00045237	mrt-1	22.050591	29.3036472
37182	H26D21.2	WBGene00003418	msh-2	144.7760571	210.0363364
37183	F09E8.3	WBGene00003421	msh-5	13.30389403	4.464866574
37184	Y47G6A.11	WBGene00003422	msh-6	138.8261139	180.8605269
37225	C06A8.1	WBGene00015512	mthf-1	122.9572508	101.7112397
37229	Y110A7A.5	WBGene00003475	mtm-1	38.35181108	36.69795019
37238	B0035.16	WBGene00007114	mttu-1	6.050453402	2.809083799
37248	C14C11.6	WBGene00003507	mut-14	13.9944628	8.22002345
37249	T01C3.8	WBGene00011323	mut-15	60.30702702	41.57219662
37252	ZK1098.8	WBGene00003504	mut-7	103.6925375	74.18554348
37345	T26A5.3	WBGene00006463	nduf-2.2	37.26335429	26.7037903
37356	F13H10.2	WBGene00003586	ndx-9	25.47914025	19.59196546
37546	C01H6.5	WBGene00003622	nhr-23	22.86177305	17.61159654
37773	K09B11.2	WBGene00010709	nol-9	33.17253232	29.61357473
37777	R03D7.7	WBGene00003783	nos-1	17.15154316	4.376437306
37778	ZK1127.1	WBGene00003784	nos-2	59.58117489	23.92310344
37797	Y56A3A.17	WBGene00003802	npp-16	149.5892482	162.3197488
37803	B0240.4	WBGene00007118	npp-22	72.51204991	51.20493685
37811	F59A2.1	WBGene00003795	npp-9	238.3535499	139.1725361
37848	F35H10.7	WBGene00018072	nprl-3	31.45992714	25.36760283
37849	T28F3.1	WBGene00012128	nra-1	109.6637507	91.22513545
37854	C14B1.6	WBGene00007577	nrde-1	60.51242443	43.29774152
37855	T01E8.5	WBGene00011333	nrde-2	156.6493685	113.453848
37923	C50F4.14	WBGene00008237	nstp-10	26.86719454	20.95495255
37926	C03H5.2	WBGene00015404	nstp-4	19.34587546	4.878234741
37936	R10E4.5	WBGene00011201	nth-1	15.63990044	10.22564413
37942	C33H5.14	WBGene00016380	ntp-1	20.77835345	3.116777389
37950	F53A2.4	WBGene00003829	nud-1	60.24203297	57.87182646
37960	W01A8.4	WBGene00012166	nuo-6	117.1767073	86.12885798
37963	C15H11.6	WBGene00003835	nxf-2	28.77843723	11.79201808
38022	Y47D3A.17	WBGene00012930	obr-1	31.80211815	15.73608499
38046	T22B11.5	WBGene00020679	ogdh-1	108.4918256	55.08690966
38053	Y32G9A.8	WBGene00021305	oig-6	11.80476935	5.201104595
38060	C09G9.6	WBGene00003864	oma-1	93.59152003	202.2504568
38068	F59E10.1	WBGene00003882	orc-2	80.63991971	172.0960814
38071	ZC168.3	WBGene00013857	orc-5	87.74911362	131.1506152
38076	M02B7.3	WBGene00003884	osm-3	1.37767337	0.837808274
38086	W01D2.5	WBGene00012182	osta-3	18.3792452	6.804076289
38098	C25D7.8	WBGene00007718	otub-1	92.46987666	101.6753025
38103	Y39A1C.2	WBGene00003898	oxi-1	64.49249985	20.14102388
38104	Y54H5A.4	WBGene00021902	oxy-4	9.467827169	15.10563756
38105	F56H1.7	WBGene00045483	oxy-5	31.82742161	22.92249692
38136	K10C8.1	WBGene00010734	parn-1	5.589215217	21.14280566
38140	C15H11.7	WBGene00003922	pas-1	102.5335866	111.3558932
38141	D1054.2	WBGene00003923	pas-2	199.3263543	246.2132776
38142	Y110A7A.14	WBGene00003924	pas-3	171.7036648	133.7921708
38144	F25H2.9	WBGene00003926	pas-5	223.5655286	252.2522422
38145	CD4.6	WBGene00003927	pas-6	92.39674415	115.6765038
38147	T22A3.5	WBGene00011908	pash-1	67.73210133	50.82801585
38165	K08D12.1	WBGene00003947	pbs-1	209.1428253	439.9236092
38166	C47B2.4	WBGene00003948	pbs-2	212.4646535	433.0318323
38167	Y38A8.2	WBGene00003949	pbs-3	139.8747239	253.5657857
38168	T20F5.2	WBGene00003950	pbs-4	157.5307163	181.7783222
38169	K05C4.1	WBGene00003951	pbs-5	232.10363	329.3745097
38170	C02F5.9	WBGene00003952	pbs-6	141.5181691	287.224067
38171	F39H11.5	WBGene00003953	pbs-7	295.6975297	487.6472456
38188	F54D5.1	WBGene00003960	pcs-1	14.89103891	15.81013577
38193	R17.2	WBGene00011268	pde-12	37.98060794	29.57827122
38202	C04C3.3	WBGene00015413	pdhb-1	44.41329511	44.29125912
38203	ZK370.5	WBGene00022719	pdhk-2	25.97238359	24.48581442
38208	H42K12.1	WBGene00003965	pdk-1	105.6816006	138.3840727
38221	T01H3.4	WBGene00011350	perm-1	2.968278335	0.322720076
38225	C55C3.5	WBGene00016955	perm-5	17.26237199	5.675083002
38251	R07G3.5	WBGene00019941	pgam-5	123.8120966	156.7560872
38255	ZK381.4	WBGene00003992	pgl-1	197.987794	260.9506986
38256	B0523.3	WBGene00003993	pgl-2	8.85010618	4.031628316
38257	C18G1.4	WBGene00003994	pgl-3	16.6498661	3.253727319
38273	Y48G1C.4	WBGene00021677	pgs-1	31.03477542	31.42938375
38286	Y59A8A.2	WBGene00013339	phf-14	55.88665109	70.82418326
38312	F18A1.8	WBGene00017549	pid-1	11.07731614	7.542034912
38313	Y49E10.14	WBGene00004027	pie-1	49.73788548	124.7825874
38318	T09B4.1	WBGene00020375	pigv-1	174.628348	123.9432977
38319	K09B11.1	WBGene00004029	pik-1	1.485462499	16.51320941
38336	F57F5.5	WBGene00004032	pkc-1	18.09339642	5.846120139
38346	C04G6.3	WBGene00004040	pld-1	66.19259148	35.61608852
38348	Y71F9B.7	WBGene00004043	plk-2	33.99154883	10.94121252
38349	F55G1.8	WBGene00004044	plk-3	15.51717831	5.606155947
38375	Y38C1AA.3	WBGene00021395	pnc-1	14.67856454	16.11962005
38384	F53A3.2	WBGene00018721	polh-1	52.65520831	31.55638931
38386	W03A3.2	WBGene00020964	polq-1	25.1047201	4.703095044
38392	F52E1.1	WBGene00004078	pos-1	524.6648904	863.8370347
38394	F57C2.3	WBGene00010195	pot-2	31.70857928	40.19588244
38399	Y71H2B.3	WBGene00022193	ppfr-4	80.79113463	83.55665424
38400	Y38F2AR.7	WBGene00021425	ppgn-1	38.68327518	20.48282332
38404	Y49E10.3	WBGene00004086	pph-4.2	109.2993933	123.9705611
38418	Y110A7A.18	WBGene00004094	ppw-2	26.10377675	34.95488868
38451	M01E11.4	WBGene00019713	pqn-52	39.71003113	11.112847
38473	Y39A3CR.7	WBGene00004163	pqn-82	39.30774544	119.1607054
38484	ZK1236.6	WBGene00004175	pqn-96	13.75164797	29.81644648
38488	F21A3.5	WBGene00008995	prde-1	2.907442163	3.927136277
38489	F09E5.15	WBGene00006434	prdx-2	226.0337231	195.9830136
38492	D2030.6	WBGene00004178	prg-1	113.0260316	40.08225461
38493	C01G5.2	WBGene00004179	prg-2	6.685010689	0.790322135
38503	C34E10.5	WBGene00016408	prmt-5	37.19754012	34.52975994
38505	W06D4.4	WBGene00012298	prmt-7	35.87913703	32.2351925
38509	F26H9.1	WBGene00009173	prom-1	15.99770798	4.128912465
38527	F54F2.8	WBGene00004201	prx-19	80.079755	91.26409548
38539	F29B9.4	WBGene00004205	psr-1	79.15741687	79.98970012
38541	T27E9.5	WBGene00012095	pssy-2	18.99012172	5.620905839
38542	M03F8.2	WBGene00004206	pst-1	11.65999934	8.091151825
38544	Y49E10.22	WBGene00013041	pstk-1	2.444227724	1.879001643
38546	ZK675.1	WBGene00004208	ptc-1	116.426584	8.485406067
38547	F21H12.4	WBGene00004209	ptc-2	0.066907586	0
38567	C32E8.8	WBGene00004217	ptr-2	48.51860443	4.528067042
38588	Y73B6BL.38	WBGene00022257	puf-11	48.07966396	11.343272
38590	Y45F10A.2	WBGene00004239	puf-3	33.41804346	4.933984492
38591	F54C9.8	WBGene00004241	puf-5	92.02315902	13.41492012
38592	F18A11.1	WBGene00004242	puf-6	24.32753897	10.03063258
38593	B0273.2	WBGene00004243	puf-7	14.66921423	6.963376605
38594	C30G12.7	WBGene00004244	puf-8	22.58213364	18.83838908
38605	D2023.2	WBGene00004258	pyc-1	65.77455469	61.12927964
38610	T05G11.1	WBGene00011505	pzf-1	8.558807018	0.404994623
38613	C24F3.4	WBGene00007698	qns-1	61.68680258	46.66577059
38637	Y42H9AR.3	WBGene00021538	rabs-5	21.61133197	18.47302471
38638	Y39A1A.5	WBGene00012644	rabx-5	20.72778113	28.01206393
38643	T04H1.4	WBGene00004296	rad-50	166.2133268	72.36833188
38645	W06D4.6	WBGene00004298	rad-54	12.20238629	9.004117251
38646	F56H1.6	WBGene00044305	rad-8	59.46279335	75.959038
38656	R05D11.3	WBGene00004305	ran-4	66.76408114	126.3328747
38669	T23F6.4	WBGene00004315	rbd-1	147.0564717	112.0327726
38673	B0393.2	WBGene00007167	rbg-3	48.59700213	9.158960486
38681	E03A3.2	WBGene00004322	rcq-5	60.73007812	36.86344683
38684	B0564.11	WBGene00023421	rde-11	24.96477148	41.13149173
38686	F21C3.4	WBGene00004324	rde-2	44.0489675	47.69121586
38689	W02A2.6	WBGene00004333	rec-8	39.56569266	21.79335209
38697	ZK675.2	WBGene00014066	rev-1	15.02774972	7.834235801
38698	C54G10.2	WBGene00004337	rfc-1	13.15084556	153.2880405
38702	F11H8.1	WBGene00004341	rfl-1	84.26711113	109.0431763
38709	K09H11.3	WBGene00019600	rga-3	95.32713533	105.5922582
38717	F45B8.2	WBGene00004353	rgs-10	3.804246091	3.950797779
38735	F08F3.3	WBGene00004358	rhr-1	2.145403948	0.131054918
38744	F58E10.1	WBGene00010259	ric-7	28.81643242	3.190030395
38746	F29C12.3	WBGene00009245	rict-1	111.6317829	69.05895337
38752	C53A5.1	WBGene00008262	ril-1	118.9653551	170.8256253
38753	C14C10.3	WBGene00007586	ril-2	66.22388492	15.6173776
38754	C32A3.3	WBGene00007860	rilp-1	24.19336206	13.58292201
38764	M142.6	WBGene00010923	rle-1	75.49219116	56.15311452
38765	T05G5.7	WBGene00011501	rmd-1	113.7788591	50.61680057
38771	T11F8.3	WBGene00004374	rme-2	32.0785046	0.717234027
38777	C06A5.9	WBGene00004380	rnf-1	19.77422544	14.01096822
38784	C04F12.9	WBGene00007303	rnh-1.3	1.532262637	4.169540919
38793	R119.7	WBGene00020091	rnp-8	33.00845002	27.3927222
38797	F55G1.4	WBGene00018900	rod-1	546.9730957	543.7995858
38812	F59A3.6	WBGene00019079	rpa-4	0.637281459	0.083623745
38817	F23B2.13	WBGene00009078	rpb-12	42.21084252	58.13856652
38828	F09F7.3	WBGene00017300	rpc-2	210.1942279	97.40034222
38831	B0280.3	WBGene00015101	rpia-1	20.43691718	17.82671846
38834	T22F3.4	WBGene00004422	rpl-11.1	63.90778774	21.66242751
38852	F52B5.6	WBGene00004439	rpl-25.2	125.0676577	92.76163839
38881	ZK20.5	WBGene00004468	rpn-12	169.658983	292.0067713
38883	C30C11.2	WBGene00004460	rpn-3	323.1691502	356.5358918
38884	F10G7.8	WBGene00004461	rpn-5	302.8868075	414.6664022
38886	F59B2.5	WBGene00010309	rpn-6.2	1.174837739	0.95838252
38887	F49C12.8	WBGene00004463	rpn-7	371.6716346	508.2790483
38889	T06D8.8	WBGene00004465	rpn-9	311.0417851	429.1224792
38894	Y105E8A.23	WBGene00013680	rpom-1	17.02022483	5.386999793
38929	F23F12.6	WBGene00004503	rpt-3	289.0825651	396.8452331
38961	F52G2.2	WBGene00004681	rsd-2	317.5254558	430.3345316
38967	T01H8.1	WBGene00011352	rskn-1	23.94243145	3.062655192
38982	F25H2.13	WBGene00009124	rtel-1	28.27526651	20.94826152
38993	F56A6.1	WBGene00018921	sago-2	1.749349856	0.271832578
38995	T24F1.2	WBGene00011994	samp-1	50.22439016	31.54855207
39010	F35B12.5	WBGene00009385	sas-5	9.549437691	38.88677904
39022	Y76A2B.6	WBGene00013578	scav-2	22.05143253	4.061704249
39059	D2013.8	WBGene00004744	scp-1	20.72356485	1.870146763
39060	B0379.4	WBGene00007054	scpl-1	9.601777294	6.082296447
39077	C34B2.7	WBGene00016392	sdha-2	63.09213485	45.46424493
39079	F33A8.5	WBGene00009353	sdhd-1	50.80332876	105.4992543
39143	F45D3.5	WBGene00004759	sel-1	71.7572335	35.69066656
39149	F35G12.3	WBGene00004762	sel-5	84.41304775	61.03626569
39175	T21B10.5	WBGene00011887	set-17	59.11291188	91.43253632
39181	Y32F6A.1	WBGene00012527	set-22	49.97299275	60.98316642
39182	Y41D4B.12	WBGene00021515	set-23	15.13833365	12.5600864
39183	Y43F11A.5	WBGene00012845	set-24	39.01092217	33.5034892
39187	Y73B3B.2	WBGene00022224	set-28	0.14219066	0.065527459
39189	C07A9.7	WBGene00007403	set-3	67.54143786	66.73996197
39192	C41G7.4	WBGene00008062	set-32	17.84781821	19.77714081
39195	C47E8.8	WBGene00008145	set-5	46.25076702	45.05211779
39227	C04F5.1	WBGene00004795	sid-1	9.107953509	4.158080691
39233	Y57A10A.20	WBGene00013261	sinh-1	32.5785612	41.1797358
39234	F43D9.4	WBGene00004798	sip-1	348.2219239	788.0799309
39243	F01G4.3	WBGene00008502	skih-2	49.2794436	50.20471429
39250	F48E8.7	WBGene00018613	skpt-1	50.79289608	45.45685976
39261	F46A9.4	WBGene00004808	skr-2	152.1955947	246.8818135
39272	C38C10.2	WBGene00008000	slc-17.2	147.3765506	65.48883322
39332	C27A2.1	WBGene00016151	smc-5	198.0589151	149.1945574
39333	F54D5.14	WBGene00010056	smc-6	191.9191273	124.5583366
39344	Y73B6A.4	WBGene00004885	smg-7	24.23887759	38.37057663
39346	Y54E2A.2	WBGene00013188	smg-9	28.90266657	46.16935658
39348	Y37E11AM.1	WBGene00021365	smgl-2	106.1591307	62.31430104
39349	Y39A3CR.1	WBGene00004886	smi-1	27.76272175	39.51964651
39376	W02F12.6	WBGene00020951	sna-1	75.74642283	109.1744112
39377	T13F2.7	WBGene00011747	sna-2	117.5457836	109.3776677
39393	M01G5.5	WBGene00004905	snf-6	39.70875213	18.26472416
39399	C06A8.2	WBGene00015513	snpc-1.1	88.03122423	65.19754299
39400	Y39E4B.2	WBGene00012715	snpc-1.2	55.6760149	25.2951272
39402	B0273.3	WBGene00015098	snpc-3.1	1.428130428	0.833648985
39403	Y48G1BM.1	WBGene00021667	snpc-3.2	2.378056142	1.610089089
39456	Y48A6B.13	WBGene00012973	spat-2	30.91965637	28.76695495
39460	F32H2.3	WBGene00004953	spd-2	292.2181227	292.0023584
39477	K01A11.4	WBGene00004976	spe-41	0.63846452	0.915110636
39483	Y66D12A.20	WBGene00004960	spe-6	2.96876007	2.908310177
39495	Y66H1B.4	WBGene00004981	spl-1	24.72449086	22.03079063
39496	ZC404.8	WBGene00004984	spn-4	324.7588983	320.1318186
39531	Y46E12BL.3	WBGene00021596	spsb-2	23.63609441	6.682359351
39551	D2096.4	WBGene00005019	sqv-1	18.27286656	1.784952193
39553	R10E11.4	WBGene00005021	sqv-3	10.72387161	3.106075091
39556	Y50D4C.4	WBGene00005024	sqv-6	34.00374438	2.899769972
40746	C34G6.7	WBGene00004109	stam-1	84.46280453	130.3790517
40757	Y55B1BM.1	WBGene00021910	stim-1	19.71238698	5.627983388
40968	Y66D12A.17	WBGene00013443	such-1	30.96480397	16.04890486
40970	F23H11.3	WBGene00017759	sucl-2	166.9037498	255.635823
40987	F57B1.2	WBGene00006311	sun-1	41.01247607	39.58264047
41000	Y71F9AR.3	WBGene00022124	supr-1	22.77297656	13.70985573
41011	C36F7.2	WBGene00007985	swah-1	14.26312665	7.63939091
41014	C33H5.6	WBGene00016373	swd-2.1	29.39665044	38.38257668
41038	T27F6.4	WBGene00012104	sygl-1	21.59462779	45.16386286
41044	F26D2.2	WBGene00006375	syp-1	31.70157732	27.25923036
41045	C24G6.1	WBGene00006376	syp-2	22.14879944	2.454866742
41046	F39H2.4	WBGene00006377	syp-3	12.68574119	10.41897492
41047	H27M09.3	WBGene00019247	syp-4	22.26074149	3.914400463
41071	C14A4.10	WBGene00006397	taf-13	65.94248756	62.09548447
41080	ZK1320.12	WBGene00006390	taf-8	56.21346861	57.68074649
41087	H38K22.3	WBGene00006478	tag-131	24.60573163	11.51277463
41094	F44A2.1	WBGene00006499	tag-153	138.1140874	105.4802529
41109	W09G3.3	WBGene00044065	tag-229	6.706564774	5.001619078
41140	ZK652.10	WBGene00022787	tag-307	47.85853264	60.39597774
41142	C33H5.19	WBGene00044325	tag-321	16.75921634	1.172358219
41147	F26F4.4	WBGene00017826	tag-340	24.05430246	6.602726471
41148	B0464.8	WBGene00007187	tag-342	80.96469166	82.83738317
41153	F25D7.2	WBGene00009112	tag-353	96.53132195	136.6747767
41159	Y47G6A.28	WBGene00006440	tag-63	57.1832439	34.50268627
41174	W09D10.2	WBGene00012360	tat-3	22.41211909	5.093544518
41205	ZK1248.10	WBGene00022880	tbc-2	120.5981794	74.31247896
41206	Y54E2A.12	WBGene00013196	tbc-20	43.71212836	19.5761412
41217	C33F10.2	WBGene00016352	tbck-1	24.78219283	21.52303537
41226	Y66A7A.8	WBGene00006552	tbx-33	59.33959234	97.93106933
41240	Y59A8A.3	WBGene00013340	tcc-1	108.1344296	16.52451082
41245	K01C8.3	WBGene00006562	tdc-1	25.96387284	1.99260651
41307	K08E3.3	WBGene00010663	toca-2	36.32311306	20.92064724
41311	C27H6.3	WBGene00007785	tofu-1	31.40051869	12.26167054
41312	F20A1.9	WBGene00017620	tofu-2	28.13426597	22.80257067
41313	K02F2.4	WBGene00006740	tofu-3	4.1854708	2.511744064
41314	F57C9.7	WBGene00019013	tofu-4	13.06157516	10.37139397
41315	W01A8.5	WBGene00012167	tofu-5	90.24599927	84.39376581
41317	ZK418.8	WBGene00022737	tofu-7	5.004539542	2.132201632
41327	Y56A3A.27	WBGene00006596	top-3	31.71661862	27.42285134
41335	F21H12.6	WBGene00017686	tpp-2	344.8652866	437.0740031
41342	Y47D3A.6	WBGene00006604	tra-1	48.98514794	26.69212709
41375	F36D4.2	WBGene00018088	trpp-4	18.59790588	23.70374254
41377	K08H10.9	WBGene00010699	trpp-6	39.95007544	41.86212645
41378	F46F11.9	WBGene00018512	trpp-8	43.96773428	21.51118607
41385	Y44E3A.3	WBGene00021548	trx-4	31.55108935	63.04837362
41388	ZK637.10	WBGene00014028	trxr-2	8.399310921	10.76297102
41398	F55C5.5	WBGene00010094	tsfm-1	47.88604866	52.32386975
41427	D2013.9	WBGene00008405	ttll-12	63.56218185	73.96641029
41483	T14G10.3	WBGene00011773	ttr-53	26.69550955	39.9100791
41503	C43E11.4	WBGene00007001	tufm-2	33.13730983	11.35870445
41569	Y110A2AR.2	WBGene00006710	ubc-15	31.12386318	36.58673257
41572	R01H2.6	WBGene00006713	ubc-18	230.3108697	437.9046238
41583	F58A4.10	WBGene00006704	ubc-7	261.2889425	467.981113
41587	Y40G12A.2	WBGene00006722	ubh-2	33.96978578	39.88392139
41596	F23C8.4	WBGene00017733	ubxn-1	75.14456709	198.1753043
41601	H06H21.6	WBGene00019163	ubxn-6	160.0020415	167.79696
41611	ZK1236.7	WBGene00022865	ufbp-1	18.99853126	11.82188927
41680	C07G3.9	WBGene00015577	ugt-64	14.62735835	3.797597218
41685	ZK370.7	WBGene00022721	ugtp-1	12.4960776	6.523040389
41790	C55B7.5	WBGene00016944	uri-1	57.91366416	67.64197067
41794	C13B4.2	WBGene00006856	usp-14	379.5073963	461.7579402
41798	R10E11.3	WBGene00011216	usp-46	56.06341334	51.18150954
41814	Y69A2AR.6	WBGene00022077	vamp-7	42.22014639	69.95012666
41822	R05G6.7	WBGene00019900	vdac-1	394.4247205	905.8726779
41843	F52E1.10	WBGene00018698	vha-18	13.74960705	2.329375277
41850	C26H9A.1	WBGene00006916	vha-7	22.10433917	9.776862519
41863	K06H7.3	WBGene00019457	vms-1	79.33394875	57.22090551
41868	C05D11.2	WBGene00006516	vps-16	105.40723	49.70495566
41869	W06B4.3	WBGene00021058	vps-18	83.38629733	67.88031084
41883	F59G1.3	WBGene00006933	vps-35	53.52276616	41.0071039
41886	T08G5.5	WBGene00011625	vps-39	183.3325029	159.9855489
41897	R06C7.1	WBGene00011061	wago-1	426.1652929	357.9443117
41900	F55A12.1	WBGene00018862	wago-2	4.306191585	1.231675991
41901	F58G1.1	WBGene00010263	wago-4	37.66582437	22.84526993
41902	ZK1248.7	WBGene00022877	wago-5	0.049262576	0.065527459
41923	Y42G9A.6	WBGene00021535	wht-7	30.04944303	29.97532219
41930	F18C5.2	WBGene00006944	wrn-1	28.29333785	22.57200925
41955	K07G5.2	WBGene00006963	xpa-1	38.15741514	34.49738253
41957	Y76B12C.2	WBGene00022296	xpc-1	89.44329645	75.94048965
41958	Y50D7A.2	WBGene00021752	xpd-1	68.59952125	62.47101386
41959	C47D12.8	WBGene00008140	xpf-1	45.03425402	26.01150672
41960	F57B10.6	WBGene00019004	xpg-1	35.6699187	20.8578333
41977	M88.5	WBGene00010908	zbp-1	53.19259794	53.97612788
41989	K02B12.8	WBGene00006976	zhp-3	34.53503047	59.77601979
41990	F59B2.6	WBGene00006977	zif-1	104.5464911	182.9529931
42002	T07G12.10	WBGene00011600	zim-2	17.24904487	15.13450975
42003	T07G12.11	WBGene00011601	zim-3	8.34489616	1.881921666
42018	F54F2.5	WBGene00018833	ztf-1	8.179913674	5.201657781
42022	R06C7.9	WBGene00011066	ztf-15	26.87953407	18.06720304
42024	T09A5.12	WBGene00011639	ztf-17	34.52006123	19.28756153
42033	F36F12.8	WBGene00018099	ztf-28	17.67537957	27.15934439
42040	ZC395.8	WBGene00022598	ztf-8	90.53925679	47.7191829
