# Supplementary material for: Recruitment of mRNAs to P granules by condensation with intrinsically-disordered proteins
Source: eLife. 2020 Jan 24;9:e52896. doi: 10.7554/eLife.52896 (PMC7007223; doi:10.7554/eLife.52896)
Supplement: Supplementary file 3. [file elife-52896-supp3.xlsx]

## Sheet: Info
Supplement Table S3. Differential expression analysis between N2 and meg3meg4 ( The whole embyro)
# This result was generated using Tophat2 followed by Cuffdiff

## Sheet: gene_exp_wholeEmb_3WTvs3meg-34_
GeneID	WBID	locus	sample_1	sample_2	status	value_1	value_2	log2(fold_change)	test_stat	p_value	q_value	significant
2L52.1	WBGene00007063	chrII:1866-4663	q1	q2	OK	80.2453	93.1171	0.21463	-0.712399	0.476218	0.999993	no
2RSSE.1	WBGene00007064	chrII:15268135-15273238	q1	q2	OK	38.3207	33.4775	-0.194931	0.549928	0.582369	0.999993	no
2RSSE.2	2RSSE.2	chrII:15274314-15275613	q1	q2	OK	16.0937	14.8071	-0.120208	0.233104	0.815681	0.999993	no
3R5.1	WBGene00007065	chrIII:13780126-13781032	q1	q2	OK	15.3353	14.7768	-0.0535211	0.107294	0.914556	0.999993	no
4-NITROPHENYLPHOSPHATASE	4-NITROPHENYLPHOSPHATASE	chrIII:8769428-8776059	q1	q2	OK	72.0092	68.6822	-0.0682446	0.170532	0.864592	0.999993	no
4R79.2	WBGene00007067	chrIV:17480359-17483294	q1	q2	OK	0.841437	1.0514	0.321378	-0.415488	0.677785	0.999993	no
6-phosphofructo-2-kinase	6-phosphofructo-2-kinase	chrIV:5941913-5946667	q1	q2	OK	86.2347	90.1247	0.0636532	-0.198277	0.842828	0.999993	no
6-phosphofructokinase	6-phosphofructokinase	chrV:9531794-9534513	q1	q2	NOTEST	0.0591543	0.11698	0.983701	-1.03143	0.302341	1	no
6R55.2	WBGene00007069	chrX:17712796-17714756	q1	q2	OK	0.307362	0.336018	0.128602	-0.101346	0.919276	0.999993	no
7tm_1	7tm_1	chrIV:8703641-8705876	q1	q2	NOTEST	0.0918941	0.0920257	0.00206586	-0.00154202	0.99877	1	no
AC3.5	WBGene00007071	chrV:10388446-10393481	q1	q2	NOTEST	0.119104	0.119535	0.0052029	-0.00596922	0.995237	1	no
AC7.3	WBGene00014997	chrIV:5111632-5112867	q1	q2	NOTEST	0	0	0	0	1	1	no
AC8.10	WBGene00043988	chrX:228079-229761	q1	q2	OK	3.8314	3.78044	-0.0193183	0.0338866	0.972968	0.999993	no
AC8.11	WBGene00043989	chrX:226650-227394	q1	q2	OK	3.08284	2.79615	-0.140821	0.211755	0.832298	0.999993	no
AC8.12	WBGene00043990	chrX:239848-240779	q1	q2	OK	1.2653	0.941233	-0.42685	0.574983	0.565303	0.999993	no
AC8.3	WBGene00007075	chrX:237495-239177	q1	q2	OK	3.6972	3.79252	0.0367218	-0.0641554	0.948846	0.999993	no
AC8.4	WBGene00007076	chrX:236066-236810	q1	q2	OK	3.00161	2.77729	-0.112059	0.167539	0.866946	0.999993	no
AC8.7	WBGene00007079	chrX:230432-231363	q1	q2	OK	1.18173	0.797523	-0.567303	0.750425	0.452998	0.999993	no
AH10.1	WBGene00007082	chrV:14146493-14148769	q1	q2	OK	0.532134	0.671545	0.335694	-0.482217	0.629652	0.999993	no
AH10.2	WBGene00007083	chrV:14156815-14157607	q1	q2	OK	2.47898	2.15078	-0.204888	0.302316	0.762411	0.999993	no
AH10.3	WBGene00007084	chrV:14144014-14145396	q1	q2	OK	6.14361	7.21542	0.231996	-0.405144	0.685371	0.999993	no
AH10.4	WBGene00007085	chrV:14112023-14141104	q1	q2	OK	3.1927	3.44179	0.108383	-0.0107389	0.991432	0.999993	no
AH6.3	WBGene00007081	chrII:9519087-9520104	q1	q2	NOTEST	0.0466184	0	-1.79769e+308	-1.79769e+308	0.181939	1	no
AH9.1	WBGene00014998	chrX:2243593-2247000	q1	q2	OK	3.1023	3.69485	0.252177	-0.41827	0.67575	0.999993	no
AH9.3	WBGene00014999	chrX:2259160-2260518	q1	q2	OK	59.2676	54.0325	-0.133417	0.378577	0.705002	0.999993	no
AH9.4	WBGene00015000	chrX:2271016-2274329	q1	q2	OK	0.342548	0.23294	-0.556346	0.656496	0.511505	0.999993	no
AH9.6	WBGene00044701	chrX:2263167-2267464	q1	q2	OK	1.72231	1.82064	0.0801017	-0.106139	0.915472	0.999993	no
ARPA	ARPA	chrIII:8028067-8029584	q1	q2	OK	117.027	120.697	0.0445563	-0.154974	0.876842	0.999993	no
B0001.2	WBGene00007087	chrIV:12146471-12150953	q1	q2	OK	23.4497	17.9468	-0.385841	1.14646	0.251606	0.999993	no
B0001.3	WBGene00007088	chrIV:12143425-12145709	q1	q2	OK	42.3221	42.4583	0.00463389	-0.0130001	0.989628	0.999993	no
B0001.4	WBGene00007089	chrIV:12135444-12137325	q1	q2	OK	56.7903	45.3409	-0.324832	0.839919	0.400954	0.999993	no
B0001.5	WBGene00007090	chrIV:12141139-12143309	q1	q2	OK	22.6917	19.2289	-0.23889	0.654833	0.512575	0.999993	no
B0001.6	WBGene00007091	chrIV:12156815-12164244	q1	q2	OK	82.2162	78.4633	-0.0674044	0.247671	0.804389	0.999993	no
B0001.7	WBGene00007092	chrIV:12151169-12154220	q1	q2	OK	24.63	20.5248	-0.26305	0.757677	0.448644	0.999993	no
B0001.8	WBGene00007093	chrIV:12138837-12141036	q1	q2	OK	43.8859	37.4142	-0.23017	0.697266	0.485636	0.999993	no
B0019.2	WBGene00007094	chrI:12773648-12782235	q1	q2	OK	33.9389	30.1303	-0.171726	0.534018	0.593329	0.999993	no
B0024.10	WBGene00007100	chrV:10314615-10317371	q1	q2	OK	34.0862	30.4476	-0.162858	0.439875	0.660028	0.999993	no
B0024.11	WBGene00007101	chrV:10317464-10319509	q1	q2	OK	59.9155	64.3174	0.10228	-0.342529	0.731953	0.999993	no
B0024.13	WBGene00007102	chrV:10320692-10322190	q1	q2	OK	8.97943	6.12555	-0.551783	0.692133	0.488854	0.999993	no
B0024.15	WBGene00007104	chrV:10290017-10292843	q1	q2	OK	0.389288	0.558325	0.520269	-0.51812	0.604374	0.999993	no
B0024.3	WBGene00007096	chrV:10287550-10289246	q1	q2	OK	2.72996	3.68089	0.431176	-0.66972	0.503036	0.999993	no
B0024.4	WBGene00007097	chrV:10297373-10298840	q1	q2	OK	0.293324	0.342615	0.224094	-0.24382	0.80737	0.999993	no
B0025.4	WBGene00015001	chrI:6027195-6028372	q1	q2	OK	112.027	113.103	0.0137848	-0.0389096	0.968962	0.999993	no
B0034.1	WBGene00015002	chrII:5970085-5972438	q1	q2	OK	2.30058	2.52704	0.13545	-0.174014	0.861854	0.999993	no
B0034.2	WBGene00015003	chrII:5944170-5944343	q1	q2	NOTEST	0	0	0	0	1	1	no
B0034.4	WBGene00015004	chrII:5968109-5969033	q1	q2	OK	0.298735	0.364065	0.285328	-0.301195	0.763266	0.999993	no
B0034.5	WBGene00015005	chrII:5972830-5974941	q1	q2	OK	1.02741	1.13855	0.148185	-0.205305	0.837334	0.999993	no
B0034.7	WBGene00044394	chrII:5961691-5961975	q1	q2	OK	22.9749	26.9623	0.230885	-0.324291	0.745718	0.999993	no
B0035.1	WBGene00007105	chrIV:11310949-11313958	q1	q2	OK	200.928	190.061	-0.0802112	0.268953	0.787966	0.999993	no
B0035.11	WBGene00007110	chrIV:11327603-11329347	q1	q2	OK	144.032	146.91	0.0285401	-0.105247	0.91618	0.999993	no
B0035.12	WBGene00007111	chrIV:11329443-11332922	q1	q2	OK	45.8547	42.1879	-0.120242	0.413893	0.678953	0.999993	no
B0035.15	WBGene00007113	chrIV:11296968-11298228	q1	q2	OK	35.4218	37.1502	0.0687311	-0.174784	0.86125	0.999993	no
B0035.16	WBGene00007114	chrIV:11295125-11296865	q1	q2	OK	12.508	12.8675	0.0408786	-0.0852956	0.932026	0.999993	no
B0035.18	WBGene00044290	chrIV:11320297-11320621	q1	q2	OK	64.1128	56.638	-0.178841	0.316533	0.751598	0.999993	no
B0035.3	WBGene00007106	chrIV:11314054-11315028	q1	q2	OK	62.5439	52.8696	-0.242432	0.655799	0.511954	0.999993	no
B0035.5	WBGene00007108	chrIV:11317394-11319926	q1	q2	OK	31.1168	32.0816	0.0440516	-0.126665	0.899206	0.999993	no
B0035.6	WBGene00007109	chrIV:11320777-11323607	q1	q2	OK	39.6779	31.5874	-0.328986	1.04742	0.294908	0.999993	no
B0041.1	WBGene00015006	chrI:4664871-4671739	q1	q2	OK	0.368589	0.183986	-1.00242	0.053853	0.957052	0.999993	no
B0041.2	WBGene00015007	chrI:4655347-4660143	q1	q2	OK	167.637	176.837	0.0770834	-0.267135	0.789365	0.999993	no
B0041.3	WBGene00015008	chrI:4644680-4645626	q1	q2	OK	16.0758	15.4304	-0.0591157	0.102841	0.918089	0.999993	no
B0041.5	WBGene00015009	chrI:4648277-4650771	q1	q2	OK	55.6517	54.9999	-0.0169975	0.0530589	0.957685	0.999993	no
B0041.8	WBGene00015011	chrI:4647309-4648276	q1	q2	OK	152.697	143.598	-0.0886339	0.294344	0.768495	0.999993	no
B0198.2	WBGene00007115	chrX:12029758-12033955	q1	q2	OK	0.470188	0.543093	0.207962	-0.0910093	0.927485	0.999993	no
B0198.3	WBGene00007116	chrX:12042547-12049260	q1	q2	OK	2.88993	2.72238	-0.0861665	0.173076	0.862591	0.999993	no
B0205.1	WBGene00015017	chrI:10713521-10718190	q1	q2	OK	74.8673	82.0163	0.131576	-0.400967	0.688445	0.999993	no
B0205.10	WBGene00015024	chrI:10708351-10710353	q1	q2	NOTEST	0.220069	0.155777	-0.498475	0.566665	0.570942	1	no
B0205.11	WBGene00015025	chrI:10732576-10733674	q1	q2	OK	51.3702	43.0299	-0.255594	0.677423	0.498138	0.999993	no
B0205.12	WBGene00044413	chrI:10730463-10730666	q1	q2	OK	301.742	288.477	-0.064861	0.108444	0.913643	0.999993	no
B0205.13	WBGene00044644	chrI:10727739-10728784	q1	q2	OK	0.509713	1.11607	1.13067	-1.19479	0.232168	0.999993	no
B0205.14	WBGene00044646	chrI:10726906-10727318	q1	q2	NOTEST	0.260368	0	-1.79769e+308	-1.79769e+308	0.260419	1	no
B0205.4	WBGene00015019	chrI:10741425-10744432	q1	q2	OK	9.95708	11.8852	0.255376	-0.527467	0.597869	0.999993	no
B0205.5	WBGene00015020	chrI:10740206-10740579	q1	q2	OK	1.9406	2.18589	0.171715	-0.142649	0.886567	0.999993	no
B0205.8	WBGene00015022	chrI:10728947-10730223	q1	q2	OK	32.5505	32.8276	0.0122299	-0.0240413	0.98082	0.999993	no
B0205.9	WBGene00015023	chrI:10720814-10723471	q1	q2	OK	57.4931	55.0332	-0.063086	0.207708	0.835457	0.999993	no
B0207.1	WBGene00015026	chrI:5965063-5967213	q1	q2	NOTEST	0.0329773	0.0502209	0.606815	-0.421768	0.673195	1	no
B0207.10	WBGene00015033	chrI:5959027-5959528	q1	q2	OK	0.998547	1.03593	0.0530208	-0.0363345	0.971016	0.999993	no
B0207.11	WBGene00015034	chrI:5963034-5964128	q1	q2	NOTEST	0	0.0169397	1.79769e+308	1.79769e+308	0.285806	1	no
B0207.2	WBGene00015027	chrI:5955032-5956885	q1	q2	OK	1.90584	2.48696	0.383958	-0.544674	0.585978	0.999993	no
B0207.5	WBGene00015028	chrI:5919788-5935418	q1	q2	NOTEST	0.14379	0.216115	0.587834	-0.902005	0.367054	1	no
B0207.6	WBGene00015029	chrI:5935538-5936946	q1	q2	OK	44.1437	40.1754	-0.135893	0.339961	0.733886	0.999993	no
B0207.7	WBGene00015030	chrI:5945758-5947344	q1	q2	NOTEST	0.0203633	0.0215606	0.0824253	-0.0322828	0.974247	1	no
B0207.8	WBGene00015031	chrI:5951137-5951699	q1	q2	NOTEST	0.0331571	0.142745	2.10605	-0.664101	0.506626	1	no
B0207.9	WBGene00015032	chrI:5957484-5958361	q1	q2	NOTEST	0.0347714	0	-1.79769e+308	-1.79769e+308	0.292951	1	no
B0212.3	WBGene00015037	chrIV:3540183-3543598	q1	q2	OK	19.5332	22.4388	0.200064	-0.546942	0.584418	0.999993	no
B0212.4	WBGene00015038	chrIV:3543623-3547596	q1	q2	OK	3.13067	4.0843	0.383617	-0.521644	0.601918	0.999993	no
B0212.6	B0212.6	chrIV:3568887-3571750	q1	q2	OK	0.894978	1.01358	0.179529	-0.226438	0.820861	0.999993	no
B0218.5	WBGene00015049	chrIV:8155239-8156433	q1	q2	OK	0.750067	0.581613	-0.36696	0.501863	0.615764	0.999993	no
B0218.7	WBGene00015051	chrIV:8164579-8166064	q1	q2	NOTEST	0	0.0233678	1.79769e+308	1.79769e+308	0.211857	1	no
B0222.1	WBGene00015053	chrV:9134276-9135325	q1	q2	OK	0.45674	0.656764	0.524004	-0.636286	0.52459	0.999993	no
B0222.10	WBGene00015058	chrV:9158360-9159515	q1	q2	NOTEST	0.0261848	0.0453669	0.792911	-0.308316	0.757842	1	no
B0222.11	WBGene00044582	chrV:9165796-9168018	q1	q2	NOTEST	0.133542	0.0912372	-0.549595	0.475045	0.634755	1	no
B0222.2	WBGene00015054	chrV:9135633-9137696	q1	q2	NOTEST	0.00333594	0.00758036	1.18417	-0.256407	0.797636	1	no
B0222.3	WBGene00015055	chrV:9138929-9141375	q1	q2	OK	4.03222	5.69412	0.497897	-0.906147	0.364858	0.999993	no
B0222.5	WBGene00015056	chrV:9152298-9154847	q1	q2	OK	0.362518	0.479022	0.402037	-0.546737	0.584559	0.999993	no
B0222.9	WBGene00015057	chrV:9168371-9172978	q1	q2	OK	6.7093	8.02043	0.257516	-0.640663	0.521742	0.999993	no
B0228.1	WBGene00015059	chrII:7755955-7756856	q1	q2	OK	2.68064	4.82599	0.848248	-1.26018	0.207606	0.999993	no
B0228.6	WBGene00015063	chrII:7754514-7755104	q1	q2	OK	215.038	242.108	0.171061	-0.516822	0.60528	0.999993	no
B0228.7	WBGene00015064	chrII:7757137-7758387	q1	q2	OK	62.3323	70.3662	0.174904	-0.513161	0.607839	0.999993	no
B0228.8	WBGene00015065	chrII:7759657-7761488	q1	q2	NOTEST	0.0412354	0.022325	-0.88522	0.429355	0.667665	1	no
B0228.9	WBGene00015066	chrII:7762009-7763617	q1	q2	NOTEST	0.0468871	0.0361084	-0.376856	0.226529	0.82079	1	no
B0238.11	WBGene00015075	chrV:5269468-5270717	q1	q2	OK	272.207	274.295	0.0110242	-0.0422396	0.966308	0.999993	no
B0238.12	WBGene00015076	chrV:5267805-5268803	q1	q2	OK	0.874084	1.16326	0.41233	-0.516026	0.605837	0.999993	no
B0238.15	WBGene00044537	chrV:5240186-5240435	q1	q2	OK	9.02267	5.32982	-0.759467	0.917085	0.359098	0.999993	no
B0238.9	WBGene00015073	chrV:5275550-5278085	q1	q2	OK	11.7311	8.81665	-0.412038	0.958428	0.337847	0.999993	no
B0244.11	WBGene00015086	chrIII:5767836-5768620	q1	q2	NOTEST	0.0769598	0.0945653	0.297206	-0.148809	0.881704	1	no
B0244.9	WBGene00015084	chrIII:5728133-5730965	q1	q2	NOTEST	0.0201627	0.0229082	0.184174	-0.010006	0.992016	1	no
B0250.2	WBGene00007119	chrV:20476723-20479058	q1	q2	OK	7.06855	6.78381	-0.0593179	0.102628	0.918258	0.999993	no
B0250.4	WBGene00007121	chrV:20458622-20464455	q1	q2	OK	25.0644	26.0903	0.0578738	-0.153061	0.87835	0.999993	no
B0250.5	WBGene00007122	chrV:20493892-20497308	q1	q2	OK	40.9572	32.1413	-0.349686	0.938321	0.348079	0.999993	no
B0250.8	WBGene00007125	chrV:20469671-20470454	q1	q2	NOTEST	0.122935	0.0405581	-1.59983	0.762618	0.445691	1	no
B0250.9	WBGene00007126	chrV:20479655-20485354	q1	q2	OK	6.61825	6.47481	-0.0316125	0.030057	0.976022	0.999993	no
B0252.1	WBGene00015087	chrII:6919686-6923613	q1	q2	OK	0.631511	0.886783	0.489773	-0.719943	0.47156	0.999993	no
B0252.3	WBGene00015088	chrII:6898691-6907713	q1	q2	OK	6.25375	7.55959	0.273587	-0.262479	0.792952	0.999993	no
B0252.5	WBGene00015089	chrII:6917006-6918878	q1	q2	NOTEST	0.0753394	0.126139	0.743535	-0.546557	0.584683	1	no
B0252.8	WBGene00044615	chrII:6916152-6916866	q1	q2	OK	1.02994	0.911458	-0.176308	0.0888995	0.929162	0.999993	no
B0261.1	WBGene00015091	chrI:5263696-5268385	q1	q2	OK	36.7198	35.3983	-0.0528756	0.173499	0.862259	0.999993	no
B0261.4	WBGene00015092	chrI:5244285-5245295	q1	q2	OK	81.5193	88.1382	0.112625	-0.272133	0.78552	0.999993	no
B0261.5	WBGene00015093	chrI:5245745-5263427	q1	q2	OK	1.4902	1.92888	0.372254	-0.0548892	0.956227	0.999993	no
B0261.6	WBGene00015094	chrI:5245745-5263427	q1	q2	OK	1.4651	2.00022	0.449156	-0.00801272	0.993607	0.999993	no
B0261.7	WBGene00015095	chrI:5269555-5270937	q1	q2	OK	116.328	93.4341	-0.316177	1.0416	0.297597	0.999993	no
B0261.8	WBGene00015096	chrI:5271330-5272040	q1	q2	OK	88.678	89.0531	0.00608942	-0.0166373	0.986726	0.999993	no
B0272.3	WBGene00007129	chrX:9431372-9432648	q1	q2	OK	115.204	115.752	0.0068544	-0.0228758	0.981749	0.999993	no
B0272.4	WBGene00007130	chrX:9428378-9430171	q1	q2	OK	28.0256	38.3097	0.450965	-1.03808	0.299232	0.999993	no
B0273.1	WBGene00015097	chrIV:5493985-5495241	q1	q2	OK	0.996085	1.31228	0.397734	-0.555517	0.578541	0.999993	no
B0273.3	WBGene00015098	chrIV:5484036-5486201	q1	q2	OK	4.95331	4.32077	-0.197105	0.362713	0.716819	0.999993	no
B0280.1	WBGene00015099	chrIII:7133726-7136398	q1	q2	OK	66.1559	75.3446	0.187634	-0.510296	0.609844	0.999993	no
B0280.10	WBGene00015105	chrIII:7132072-7133616	q1	q2	OK	38.6561	44.588	0.20596	-0.548433	0.583394	0.999993	no
B0280.13	WBGene00015107	chrIII:7128838-7131986	q1	q2	OK	0.870094	0.644639	-0.43268	0.600918	0.547894	0.999993	no
B0280.17	WBGene00044674	chrIII:7133726-7136398	q1	q2	OK	8.42806	10.5673	0.326329	-0.297767	0.765881	0.999993	no
B0280.2	WBGene00015100	chrIII:7124601-7128320	q1	q2	NOTEST	0.198001	0.142282	-0.476759	0.526362	0.598637	1	no
B0280.3	WBGene00015101	chrIII:7123061-7124267	q1	q2	OK	24.0526	19.4801	-0.304194	0.700834	0.483406	0.999993	no
B0280.7	WBGene00015103	chrIII:7110240-7111811	q1	q2	OK	2.36908	3.35686	0.502782	-0.736781	0.461256	0.999993	no
B0280.9	WBGene00015104	chrIII:7120842-7122833	q1	q2	OK	88.9334	95.0333	0.0957082	-0.326132	0.744324	0.999993	no
B0281.1	WBGene00015108	chrII:2313071-2314932	q1	q2	NOTEST	0.0294525	0.0995541	1.75709	-0.668134	0.504048	1	no
B0281.3	WBGene00015110	chrII:2307045-2308356	q1	q2	NOTEST	0.228231	0.162939	-0.48616	0.459609	0.645797	1	no
B0281.4	WBGene00015111	chrII:2297942-2298798	q1	q2	OK	1.12204	1.1129	-0.0118049	0.0154475	0.987675	0.999993	no
B0281.5	WBGene00015112	chrII:2299946-2300887	q1	q2	OK	256.492	238.796	-0.103132	0.351276	0.725381	0.999993	no
B0281.6	WBGene00015113	chrII:2301405-2302234	q1	q2	OK	2.20923	2.65104	0.26302	-0.383984	0.70099	0.999993	no
B0281.8	WBGene00015114	chrII:2311494-2312852	q1	q2	NOTEST	0.0216152	0	-1.79769e+308	-1.79769e+308	0.233794	1	no
B0284.1	WBGene00007131	chrIII:4376956-4379172	q1	q2	OK	4406.56	7669.63	0.799505	-1.79363	0.072873	0.999993	no
B0284.2	WBGene00007132	chrIII:4381955-4384113	q1	q2	OK	1.47061	2.5366	0.786479	-1.22832	0.219326	0.999993	no
B0284.3	WBGene00007133	chrIII:4379339-4381013	q1	q2	OK	21.0735	22.5018	0.0946093	-0.187369	0.851372	0.999993	no
B0284.4	WBGene00007134	chrIII:4384758-4387729	q1	q2	NOTEST	0.0361646	0.0549886	0.604556	-0.369842	0.7115	1	no
B0285.1	WBGene00007135	chrIII:4333368-4340436	q1	q2	OK	33.4418	29.8885	-0.162059	0.510092	0.609987	0.999993	no
B0285.3	WBGene00007136	chrIII:4341957-4343308	q1	q2	OK	4.67027	3.65115	-0.355153	0.570179	0.568556	0.999993	no
B0285.4	WBGene00007137	chrIII:4343432-4345192	q1	q2	OK	68.9075	68.8868	-0.000432997	0.00133467	0.998935	0.999993	no
B0285.6	WBGene00007138	chrIII:4352217-4355945	q1	q2	OK	0.218161	0.355348	0.70384	-0.847124	0.396926	0.999993	no
B0286.1	WBGene00015115	chrII:4378838-4386290	q1	q2	OK	23.2673	26.0075	0.160624	-0.346861	0.728696	0.999993	no
B0286.3	WBGene00015116	chrII:4369628-4372572	q1	q2	OK	4.65881	5.55409	0.253589	-0.468189	0.63965	0.999993	no
B0294.1	WBGene00015117	chrX:1896847-1897337	q1	q2	NOTEST	0	0	0	0	1	1	no
B0294.3	WBGene00015118	chrX:1892180-1893266	q1	q2	OK	0.750328	0.626414	-0.260407	0.107501	0.914391	0.999993	no
B0302.2	WBGene00015119	chrX:17178464-17178918	q1	q2	OK	6.10033	9.20371	0.593329	-0.887557	0.374779	0.999993	no
B0302.4	WBGene00015121	chrX:17176415-17176703	q1	q2	OK	14.4631	18.4023	0.347507	-0.483821	0.628513	0.999993	no
B0302.5	WBGene00015122	chrX:17193226-17195044	q1	q2	OK	2.72077	2.22574	-0.28973	0.408632	0.68281	0.999993	no
B0303.11	WBGene00015131	chrIII:8703225-8710031	q1	q2	OK	1.07266	1.09458	0.0291798	-0.044742	0.964313	0.999993	no
B0303.14	WBGene00015132	chrIII:8713909-8716103	q1	q2	OK	21.7197	21.524	-0.0130589	0.0336553	0.973152	0.999993	no
B0303.15	WBGene00015133	chrIII:8717562-8718418	q1	q2	OK	90.2387	84.7396	-0.090711	0.247737	0.804338	0.999993	no
B0303.16	WBGene00044678	chrIII:8703225-8710031	q1	q2	NOTEST	0.169687	0.293679	0.791365	-0.258499	0.796022	1	no
B0303.2	WBGene00015124	chrIII:8684726-8688376	q1	q2	OK	13.5079	14.7494	0.126848	-0.0911642	0.927362	0.999993	no
B0303.3	WBGene00015125	chrIII:8684726-8688376	q1	q2	OK	178.214	198.416	0.154923	-0.598471	0.549526	0.999993	no
B0303.4	WBGene00015126	chrIII:8689768-8693393	q1	q2	OK	24.8242	26.6455	0.102146	-0.301531	0.76301	0.999993	no
B0303.7	WBGene00015128	chrIII:8693556-8699374	q1	q2	OK	23.8951	21.4318	-0.156965	0.417864	0.676046	0.999993	no
B0304.2	WBGene00015134	chrII:4523640-4524523	q1	q2	OK	20.9392	13.4689	-0.636579	1.28006	0.200523	0.999993	no
B0304.4	WBGene00015136	chrII:4522470-4523219	q1	q2	OK	14.3823	11.0522	-0.37996	0.686865	0.492168	0.999993	no
B0310.1	WBGene00015137	chrX:493236-497214	q1	q2	OK	6.74323	7.11759	0.0779487	-0.125202	0.900364	0.999993	no
B0310.2	WBGene00015138	chrX:501965-506943	q1	q2	OK	20.0472	15.4222	-0.378395	0.944239	0.345047	0.999993	no
B0310.3	WBGene00015139	chrX:510899-514483	q1	q2	OK	0.627411	0.347348	-0.853029	1.08712	0.276983	0.999993	no
B0310.6	WBGene00015142	chrX:530625-530962	q1	q2	OK	3.96537	2.5121	-0.658563	0.672958	0.500974	0.999993	no
B0331.2	WBGene00007141	chrV:9658906-9661590	q1	q2	OK	0.256082	0.446918	0.803405	-1.0332	0.301512	0.999993	no
B0334.10	WBGene00007148	chrII:11518423-11526998	q1	q2	OK	0.888063	0.601421	-0.562286	0.103107	0.917878	0.999993	no
B0334.13	WBGene00007149	chrII:11488273-11489469	q1	q2	OK	9.10841	10.4461	0.19769	-0.265427	0.79068	0.999993	no
B0334.3	WBGene00007143	chrII:11489540-11492957	q1	q2	OK	73.3528	81.7275	0.15597	-0.53905	0.589852	0.999993	no
B0334.4	WBGene00007144	chrII:11495627-11496604	q1	q2	OK	139.272	124.6	-0.160606	0.515799	0.605995	0.999993	no
B0334.5	WBGene00007145	chrII:11496715-11499556	q1	q2	OK	10.1315	8.46316	-0.259579	0.573739	0.566144	0.999993	no
B0334.6	WBGene00007146	chrII:11510610-11513816	q1	q2	OK	4.83544	5.40493	0.160631	-0.287404	0.773803	0.999993	no
B0336.11	WBGene00015148	chrIII:5706691-5709284	q1	q2	OK	8.70169	10.1077	0.216086	-0.384929	0.70029	0.999993	no
B0336.12	WBGene00015149	chrIII:5710016-5710464	q1	q2	OK	2.01387	3.07315	0.609746	-0.674459	0.500019	0.999993	no
B0336.13	WBGene00015150	chrIII:5693990-5694634	q1	q2	OK	66.9701	60.4742	-0.147196	0.350498	0.725965	0.999993	no
B0336.3	WBGene00015143	chrIII:5711502-5714742	q1	q2	OK	73.719	70.3521	-0.0674427	0.249707	0.802814	0.999993	no
B0336.5	WBGene00015145	chrIII:5692874-5693893	q1	q2	OK	36.4517	31.1953	-0.224657	0.469149	0.638963	0.999993	no
B0336.7	WBGene00015147	chrIII:5694689-5697320	q1	q2	OK	34.0648	34.4347	0.0155812	-0.0426866	0.965951	0.999993	no
B0348.1	WBGene00015151	chrV:48921-49619	q1	q2	NOTEST	0.210127	0	-1.79769e+308	-1.79769e+308	0.233794	1	no
B0348.2	WBGene00015152	chrV:45466-46880	q1	q2	OK	2.85867	3.50472	0.293953	-0.322883	0.746784	0.999993	no
B0348.5	WBGene00015153	chrV:5689-6511	q1	q2	OK	1.95768	3.04583	0.637688	-0.896838	0.369805	0.999993	no
B0350.3	B0350.3	chrIV:5965469-5966028	q1	q2	OK	0.645206	1.59856	1.30894	-0.89043	0.373235	0.999993	no
B0353.1	WBGene00015155	chrIII:557514-572134	q1	q2	OK	23.3977	18.0125	-0.377374	0.729377	0.465771	0.999993	no
B0361.11	WBGene00015165	chrIII:7277539-7281134	q1	q2	NOTEST	0.0670654	0.116502	0.796715	-0.761205	0.446535	1	no
B0361.2	WBGene00015156	chrIII:7293569-7308826	q1	q2	OK	75.8849	80.2443	0.0805855	-0.181469	0.856	0.999993	no
B0361.3	WBGene00015157	chrIII:7281339-7285819	q1	q2	OK	53.7388	62.5645	0.219381	-0.700546	0.483586	0.999993	no
B0361.4	WBGene00015158	chrIII:7258948-7275332	q1	q2	OK	0.586933	0.775834	0.402553	-0.143922	0.885562	0.999993	no
B0361.6	WBGene00015160	chrIII:7275440-7277210	q1	q2	OK	79.823	80.5139	0.012433	-0.0407545	0.967492	0.999993	no
B0361.7	WBGene00015161	chrIII:7281339-7285819	q1	q2	OK	17.2086	14.459	-0.251164	0.348093	0.72777	0.999993	no
B0361.8	WBGene00015162	chrIII:7287800-7290500	q1	q2	OK	86.1923	97.0474	0.17113	-0.590533	0.554834	0.999993	no
B0361.9	WBGene00015163	chrIII:7293569-7308826	q1	q2	OK	5.74154	5.57512	-0.0424365	0.0318547	0.974588	0.999993	no
B0365.1	WBGene00007150	chrV:13116487-13120120	q1	q2	OK	16.6194	16.2268	-0.0344929	0.102488	0.918369	0.999993	no
B0379.1	WBGene00007155	chrI:10074957-10077734	q1	q2	OK	1.14146	0.999249	-0.19196	0.241299	0.809324	0.999993	no
B0379.2	WBGene00007156	chrI:10070911-10071725	q1	q2	NOTEST	0.156471	0.240874	0.622389	-0.50031	0.616857	1	no
B0379.6	WBGene00007158	chrI:10086522-10102001	q1	q2	NOTEST	0.142852	0.251602	0.816615	-0.098833	0.921271	1	no
B0379.7	WBGene00007159	chrI:10072597-10074376	q1	q2	NOTEST	0.0600524	0.0655096	0.125484	-0.0970022	0.922725	1	no
B0391.10	WBGene00007165	chrV:15585677-15592966	q1	q2	OK	1.57498	1.98825	0.336165	-0.510058	0.610011	0.999993	no
B0391.3	WBGene00007161	chrV:15613166-15617592	q1	q2	NOTEST	0.0096115	0	-1.79769e+308	-1.79769e+308	0.395953	1	no
B0393.3	WBGene00007168	chrIII:4757212-4759686	q1	q2	OK	202.436	196.853	-0.0403443	0.157315	0.874997	0.999993	no
B0393.4	WBGene00007169	chrIII:4759728-4763574	q1	q2	NOTEST	0.0273414	0.059529	1.12251	-0.879041	0.379379	1	no
B0393.5	WBGene00007170	chrIII:4769041-4778021	q1	q2	OK	29.4346	34.2087	0.216851	-0.723119	0.469607	0.999993	no
B0393.6	WBGene00007171	chrIII:4780403-4781946	q1	q2	OK	4.1144	2.48615	-0.726768	1.19564	0.231839	0.999993	no
B0393.7	WBGene00007172	chrIII:4769041-4778021	q1	q2	OK	0.61681	0.919779	0.576461	-0.13238	0.894684	0.999993	no
B0393.9	WBGene00044636	chrIII:4778355-4779987	q1	q2	OK	5.22325	7.43379	0.509151	-0.700986	0.483311	0.999993	no
B0395.2	WBGene00007174	chrX:16030733-16034727	q1	q2	OK	11.3844	12.5492	0.140538	-0.310409	0.75625	0.999993	no
B0395.3	WBGene00007175	chrX:16034990-16039442	q1	q2	OK	13.9534	12.0556	-0.210919	0.531188	0.595288	0.999993	no
B0399.1	WBGene00007176	chrV:19565355-19606085	q1	q2	OK	0.331359	0.249541	-0.40912	0.233812	0.815131	0.999993	no
B0403.3	WBGene00015167	chrX:7061804-7063286	q1	q2	OK	0.190092	0.339542	0.836895	-0.803717	0.42156	0.999993	no
B0403.5	WBGene00015169	chrX:7057763-7061024	q1	q2	OK	6.08345	5.56472	-0.12858	0.217841	0.827553	0.999993	no
B0403.6	WBGene00043982	chrX:7071483-7075293	q1	q2	OK	0.663246	0.908111	0.453324	-0.508666	0.610986	0.999993	no
B0410.1	WBGene00015170	chrX:2892545-2898207	q1	q2	OK	1.33134	1.92016	0.528346	-0.162144	0.871193	0.999993	no
B0410.3	WBGene00015172	chrX:2890616-2891483	q1	q2	OK	7.11976	5.0142	-0.50581	0.848755	0.396018	0.999993	no
B0412.3	WBGene00015173	chrIII:795130-809434	q1	q2	OK	35.4786	37.2061	0.0685901	-0.237267	0.812449	0.999993	no
B0414.8	WBGene00015176	chrI:5803955-5807294	q1	q2	OK	58.1817	67.7051	0.2187	-0.765453	0.444002	0.999993	no
B0416.1	WBGene00015177	chrX:9303664-9310372	q1	q2	OK	7.32908	7.27587	-0.0105121	0.0264305	0.978914	0.999993	no
B0416.2	WBGene00015178	chrX:9299111-9300072	q1	q2	NOTEST	0	0.0457097	1.79769e+308	1.79769e+308	0.21834	1	no
B0416.3	WBGene00015179	chrX:9291591-9293307	q1	q2	OK	0.471027	0.580659	0.301883	-0.333768	0.738554	0.999993	no
B0416.4	WBGene00015180	chrX:9278902-9279784	q1	q2	OK	31.7231	31.5855	-0.00626947	0.013841	0.988957	0.999993	no
B0416.5	WBGene00015181	chrX:9268574-9270794	q1	q2	OK	115.535	104.301	-0.147575	0.489856	0.624236	0.999993	no
B0416.7	WBGene00015182	chrX:9296950-9297873	q1	q2	OK	0.619329	0.174291	-1.82921	1.02211	0.306729	0.999993	no
B0432.1	WBGene00015183	chrII:297398-299527	q1	q2	OK	0.711142	0.266257	-1.41732	1.56874	0.116708	0.999993	no
B0432.10	WBGene00015191	chrII:283915-286275	q1	q2	OK	37.3058	40.1684	0.10666	-0.281679	0.77819	0.999993	no
B0432.11	WBGene00015192	chrII:293918-294642	q1	q2	NOTEST	0	0	0	0	1	1	no
B0432.13	WBGene00015194	chrII:276860-282578	q1	q2	OK	24.3354	24.4199	0.00499643	-0.0125481	0.989988	0.999993	no
B0432.14	WBGene00044640	chrII:264352-265841	q1	q2	OK	1.87041	0.897867	-1.05878	1.16537	0.243869	0.999993	no
B0432.3	WBGene00015185	chrII:288938-290382	q1	q2	OK	80.5202	93.1236	0.209796	-0.572194	0.567191	0.999993	no
B0432.6	B0432.6	chrII:266446-269184	q1	q2	OK	28.7052	28.5543	-0.00760615	0.0187105	0.985072	0.999993	no
B0432.7	WBGene00015188	chrII:269389-273966	q1	q2	OK	23.6949	21.0853	-0.16834	0.467062	0.640456	0.999993	no
B0432.8	WBGene00015189	chrII:276860-282578	q1	q2	OK	11.7599	8.43274	-0.479802	0.516319	0.605632	0.999993	no
B0432.9	WBGene00015190	chrII:282639-283683	q1	q2	OK	12.5309	12.3101	-0.0256403	0.0469857	0.962525	0.999993	no
B0454.5	WBGene00015196	chrII:3038861-3040825	q1	q2	OK	0.783919	0.88825	0.180261	-0.226631	0.820711	0.999993	no
B0454.6	WBGene00015197	chrII:3032782-3036125	q1	q2	OK	2.25835	2.08344	-0.116301	0.199063	0.842213	0.999993	no
B0454.8	WBGene00015199	chrII:3040985-3043409	q1	q2	OK	0.532075	0.457198	-0.218811	0.286307	0.774643	0.999993	no
B0454.9	WBGene00015200	chrII:3046221-3071067	q1	q2	OK	23.6022	26.4335	0.163449	-0.24412	0.807138	0.999993	no
B0457.2	WBGene00007178	chrII:8924521-8926517	q1	q2	OK	2.1597	2.1575	-0.00147214	0.00203591	0.998376	0.999993	no
B0457.4	WBGene00007179	chrII:8910851-8911968	q1	q2	NOTEST	0.0227628	0.0136913	-0.733419	0.220976	0.825111	1	no
B0457.6	WBGene00007180	chrII:8922389-8924225	q1	q2	OK	4.79775	5.20876	0.118583	-0.160952	0.872131	0.999993	no
B0462.1	WBGene00007181	chrV:18324993-18328763	q1	q2	OK	0.63009	0.724774	0.201972	-0.297891	0.765787	0.999993	no
B0462.4	WBGene00007183	chrV:18329083-18331151	q1	q2	OK	2.44387	1.95821	-0.319629	0.414888	0.678224	0.999993	no
B0464.2	WBGene00007184	chrIII:9491555-9496962	q1	q2	OK	125.5	143.334	0.191691	-0.766588	0.443327	0.999993	no
B0464.6	WBGene00007186	chrIII:9463036-9467058	q1	q2	OK	57.7419	47.5339	-0.280662	0.826941	0.408271	0.999993	no
B0464.9	WBGene00007188	chrIII:9463036-9467058	q1	q2	OK	45.2925	44.8351	-0.0146431	0.0286184	0.977169	0.999993	no
B0478.3	WBGene00015202	chrIV:6963863-6964551	q1	q2	OK	1.96755	3.39699	0.787854	-0.96561	0.33424	0.999993	no
B0491.1	WBGene00007189	chrII:11348365-11349882	q1	q2	OK	33.9308	34.1293	0.00841326	-0.0228843	0.981743	0.999993	no
B0491.5	WBGene00007192	chrII:11343651-11345679	q1	q2	OK	121.86	112.779	-0.111726	0.390604	0.69609	0.999993	no
B0491.6	WBGene00007193	chrII:11345885-11347893	q1	q2	OK	37.3427	37.6784	0.0129102	-0.0341967	0.97272	0.999993	no
B0491.7	WBGene00007194	chrII:11350127-11351160	q1	q2	OK	49.7297	57.3338	0.205278	-0.550651	0.581873	0.999993	no
B0495.5	WBGene00015204	chrII:7695892-7698454	q1	q2	OK	29.1718	31.4145	0.106856	-0.326977	0.743686	0.999993	no
B0495.6	WBGene00015205	chrII:7698622-7698980	q1	q2	OK	164.238	123.151	-0.41536	0.861765	0.388817	0.999993	no
B0495.7	WBGene00015206	chrII:7699200-7705180	q1	q2	OK	112.687	109.665	-0.0392084	0.133734	0.893613	0.999993	no
B0495.8	WBGene00015207	chrII:7705485-7707428	q1	q2	OK	113.441	107.618	-0.0760183	0.16668	0.867622	0.999993	no
B0495.9	WBGene00015208	chrII:7707528-7708660	q1	q2	OK	63.2506	65.1034	0.0416534	-0.119332	0.905012	0.999993	no
B0496.1	WBGene00015210	chrIV:7446378-7447408	q1	q2	NOTEST	0.213389	0.139638	-0.611795	0.526738	0.598375	1	no
B0496.2	WBGene00015211	chrIV:7447967-7451434	q1	q2	OK	0.300258	0.338352	0.17232	-0.0400345	0.968066	0.999993	no
B0496.4	B0496.4	chrIV:7424486-7432104	q1	q2	OK	7.20801	7.75354	0.105254	-0.195454	0.845038	0.999993	no
B0496.6	WBGene00015215	chrIV:7419140-7419960	q1	q2	NOTEST	0.0142204	0.208576	3.87454	-1.31801	0.1875	1	no
B0507.1	WBGene00015218	chrV:8776633-8779271	q1	q2	OK	7.85948	7.78422	-0.0138815	0.0302048	0.975904	0.999993	no
B0507.10	WBGene00015227	chrV:8758797-8760469	q1	q2	OK	0.410517	0.645996	0.654083	-0.899532	0.368369	0.999993	no
B0507.2	WBGene00015219	chrV:8774309-8776459	q1	q2	OK	33.9881	37.7592	0.151798	-0.42686	0.669481	0.999993	no
B0507.3	WBGene00015220	chrV:8768886-8770854	q1	q2	OK	4.71305	3.78066	-0.318022	0.500342	0.616834	0.999993	no
B0507.4	WBGene00015221	chrV:8754947-8755737	q1	q2	NOTEST	0.0189959	0.102288	2.42888	-0.815079	0.415027	1	no
B0507.5	WBGene00015222	chrV:8753672-8754851	q1	q2	NOTEST	0	0	0	0	1	1	no
B0507.6	WBGene00015223	chrV:8746135-8753044	q1	q2	NOTEST	0.0282313	0.135804	2.26616	-2.01373	0.0440382	1	no
B0507.7	WBGene00015224	chrV:8755874-8758696	q1	q2	NOTEST	0.0507652	0.0851098	0.745486	-0.518065	0.604413	1	no
B0507.8	WBGene00015225	chrV:8760664-8762730	q1	q2	OK	0.293978	0.443203	0.59226	-0.712114	0.476394	0.999993	no
B0507.9	WBGene00015226	chrV:8764930-8766016	q1	q2	NOTEST	0.082018	0.166564	1.02206	-0.724081	0.469016	1	no
B0511.11	WBGene00015236	chrI:10648594-10650163	q1	q2	OK	5.81092	5.2276	-0.152617	0.277764	0.781193	0.999993	no
B0511.12	WBGene00015237	chrI:10654286-10661591	q1	q2	OK	40.1614	36.7983	-0.12617	0.465245	0.641756	0.999993	no
B0511.13	WBGene00015238	chrI:10633507-10636006	q1	q2	OK	28.8813	21.4722	-0.427665	1.12118	0.262212	0.999993	no
B0511.14	B0511.14	chrI:10662515-10666866	q1	q2	OK	44.661	44.3648	-0.00959859	0.0256868	0.979507	0.999993	no
B0511.2	WBGene00015228	chrI:10651018-10652951	q1	q2	OK	6.58024	6.20944	-0.0836783	0.1602	0.872724	0.999993	no
B0511.7	WBGene00015233	chrI:10631734-10633139	q1	q2	OK	129.434	127.677	-0.0197217	0.0650885	0.948104	0.999993	no
B0513.2	WBGene00007195	chrIV:13882708-13884124	q1	q2	OK	139.497	140.34	0.00868871	-0.0276679	0.977927	0.999993	no
B0513.4	WBGene00007196	chrIV:13880112-13881501	q1	q2	OK	1.45663	1.5785	0.115925	-0.144409	0.885178	0.999993	no
B0513.5	WBGene00007197	chrIV:13868547-13876590	q1	q2	OK	2.02681	2.28349	0.172028	-0.274402	0.783775	0.999993	no
B0513.6	WBGene00007198	chrIV:13854329-13857326	q1	q2	NOTEST	0.120598	0.130435	0.11313	-0.088736	0.929292	1	no
B0513.9	WBGene00007200	chrIV:13860347-13865269	q1	q2	OK	0.806062	0.825216	0.0338801	-0.0215832	0.98278	0.999993	no
B0524.1	B0524.1	chrIII:1905957-1910548	q1	q2	OK	25.6743	27.7139	0.110283	-0.303494	0.761514	0.999993	no
B0524.2	WBGene00015241	chrIII:1894092-1899847	q1	q2	NOTEST	0.0499252	0.0111846	-2.15825	0.778258	0.436417	1	no
B0524.3	WBGene00015242	chrIII:1888158-1889682	q1	q2	NOTEST	0.0366115	0.070122	0.937568	-0.661331	0.5084	1	no
B0524.4	WBGene00015243	chrIII:1883597-1886209	q1	q2	NOTEST	0.0306032	0.0116417	-1.39439	0.695445	0.486777	1	no
B0524.5	WBGene00015244	chrIII:1891268-1893546	q1	q2	NOTEST	0.0406249	0.0461566	0.184174	-0.0688386	0.945118	1	no
B0524.6	WBGene00015245	chrIII:1902183-1905631	q1	q2	OK	10.3785	8.68588	-0.256854	0.479289	0.631733	0.999993	no
B0524.7	WBGene00195367	chrIII:1911063-1917219	q1	q2	OK	17.6542	18.1635	0.0410336	-0.105404	0.916055	0.999993	no
B0546.2	WBGene00015249	chrIV:3369193-3378129	q1	q2	OK	25.8176	19.0694	-0.437097	0.855648	0.392192	0.999993	no
B0546.3	WBGene00015250	chrIV:3378594-3382108	q1	q2	OK	6.40081	5.60688	-0.191056	0.369826	0.711512	0.999993	no
B0546.4	WBGene00015251	chrIV:3382944-3384144	q1	q2	OK	15.5507	11.6905	-0.411636	0.767615	0.442716	0.999993	no
B0546.5	WBGene00015252	chrIV:3388072-3390084	q1	q2	NOTEST	0.0530155	0.205571	1.95515	-1.48261	0.138179	1	no
B0547.2	WBGene00015253	chrIV:5645819-5646222	q1	q2	NOTEST	0	0	0	0	1	1	no
B0554.1	WBGene00015254	chrV:437576-441024	q1	q2	OK	0.406158	0.367802	-0.143111	0.0558313	0.955476	0.999993	no
B0554.2	WBGene00015255	chrV:434768-436727	q1	q2	NOTEST	0.0164639	0.0064749	-1.34638	0.431615	0.666022	1	no
B0554.3	B0554.3	chrV:434148-434402	q1	q2	NOTEST	0	0	0	0	1	1	no
B0554.4	WBGene00015257	chrV:430612-433575	q1	q2	NOTEST	0.0827542	0.0449423	-0.880758	0.681974	0.495255	1	no
B0554.5	WBGene00015258	chrV:424440-426561	q1	q2	NOTEST	0.023537	0.00777774	-1.59751	0.548108	0.583618	1	no
B0554.7	WBGene00015260	chrV:437576-441024	q1	q2	NOTEST	0.0742493	0.194287	1.38774	-1.30933	0.190424	1	no
B0563.1	WBGene00015261	chrX:9171504-9172147	q1	q2	OK	8.81379	6.68593	-0.398634	0.643067	0.520181	0.999993	no
B0563.10	WBGene00077673	chrX:9166848-9167184	q1	q2	OK	0.320727	0.107525	-1.57667	0.515007	0.606548	0.999993	no
B0563.5	WBGene00015262	chrX:9146116-9147421	q1	q2	OK	0.362922	0.484836	0.417838	-0.283663	0.776669	0.999993	no
B0563.6	WBGene00015263	chrX:9137869-9145537	q1	q2	OK	1.33615	1.26415	-0.0799206	0.089575	0.928625	0.999993	no
B0563.8	WBGene00015265	chrX:9173627-9174433	q1	q2	OK	16.8204	16.4978	-0.0279341	0.0406595	0.967567	0.999993	no
B0563.9	WBGene00044687	chrX:9168496-9168965	q1	q2	OK	0.536425	1.45182	1.43641	-0.693555	0.487962	0.999993	no
B0564.11	WBGene00023421	chrIV:13105312-13106889	q1	q2	OK	17.151	7.17915	-1.25641	2.74228	0.00610145	0.999993	no
B0564.2	WBGene00007202	chrIV:13107634-13109775	q1	q2	OK	17.3273	8.89068	-0.962682	1.39255	0.163757	0.999993	no
B0564.3	WBGene00007203	chrIV:13107634-13109775	q1	q2	OK	2.07046	2.21703	0.0986715	-0.118714	0.905502	0.999993	no
B0564.4	WBGene00007204	chrIV:13111028-13113058	q1	q2	OK	3.02538	1.44563	-1.06541	1.78156	0.0748214	0.999993	no
B0564.6	WBGene00007206	chrIV:13135219-13138798	q1	q2	OK	1.55594	1.62034	0.058508	-0.0815863	0.934976	0.999993	no
B0564.7	WBGene00007207	chrIV:13100690-13104616	q1	q2	OK	31.9154	27.6677	-0.206054	0.605874	0.544599	0.999993	no
B0564.9	WBGene00007208	chrIV:13135219-13138798	q1	q2	OK	0.234007	0.329375	0.493176	-0.197275	0.843613	0.999993	no
BE0003N10.1	WBGene00015266	chrIII:1037498-1046038	q1	q2	OK	6.54939	5.39061	-0.280912	0.610565	0.541488	0.999993	no
BE0003N10.3	WBGene00015268	chrIII:1046558-1060000	q1	q2	OK	6.31281	6.23733	-0.0173527	0.0420959	0.966422	0.999993	no
BE10.1	WBGene00007209	chrIII:12785052-12793027	q1	q2	NOTEST	0	0.0233679	1.79769e+308	1.79769e+308	0.284342	1	no
BE10.2	WBGene00007210	chrIII:12793323-12798056	q1	q2	OK	17.7703	21.1138	0.248718	-0.591436	0.554228	0.999993	no
BE10.3	WBGene00007211	chrIII:12807989-12812522	q1	q2	OK	26.2341	26.8109	0.0313724	-0.0876491	0.930156	0.999993	no
BE10.4	WBGene00007212	chrIII:12813439-12816697	q1	q2	OK	1.62841	1.64525	0.0148471	-0.0222116	0.982279	0.999993	no
BE10.5	WBGene00044127	chrIII:12806125-12806711	q1	q2	OK	2.47437	2.4065	-0.0401275	0.0469211	0.962576	0.999993	no
C01A2.1	WBGene00007213	chrI:13408785-13411440	q1	q2	OK	4.13995	4.42098	0.094755	-0.180124	0.857055	0.999993	no
C01A2.2	WBGene00007214	chrI:13397258-13398469	q1	q2	OK	62.6718	70.8091	0.176119	-0.207963	0.835258	0.999993	no
C01A2.3	WBGene00007215	chrI:13387807-13391439	q1	q2	OK	38.4132	36.573	-0.0708213	0.205597	0.837106	0.999993	no
C01A2.4	WBGene00007216	chrI:13392106-13393966	q1	q2	OK	55.2953	57.9079	0.0666029	-0.171002	0.864222	0.999993	no
C01A2.5	WBGene00007217	chrI:13384740-13387073	q1	q2	OK	197.784	209.686	0.0843044	-0.31217	0.754911	0.999993	no
C01A2.6	WBGene00007218	chrI:13379905-13384360	q1	q2	NOTEST	0.0795193	0.0856384	0.106953	-0.0694561	0.944627	1	no
C01A2.9	WBGene00077546	chrI:13376864-13377554	q1	q2	NOTEST	0.204947	0.241882	0.239053	-0.131569	0.895325	1	no
C01B10.10	WBGene00015284	chrIV:6624359-6627981	q1	q2	OK	8.39644	10.1147	0.268605	-0.593567	0.552802	0.999993	no
C01B10.11	WBGene00044294	chrIV:6657986-6660386	q1	q2	OK	67.8559	67.382	-0.0101117	0.0299888	0.976076	0.999993	no
C01B10.3	WBGene00015278	chrIV:6619526-6621341	q1	q2	OK	0.977128	1.39735	0.516076	-0.755775	0.449784	0.999993	no
C01B10.4	WBGene00015279	chrIV:6628366-6631734	q1	q2	OK	2.9521	3.87418	0.392153	-0.692986	0.488318	0.999993	no
C01B10.6	WBGene00015280	chrIV:6640149-6645341	q1	q2	OK	2.1827	2.08974	-0.0627911	0.0915271	0.927074	0.999993	no
C01B10.7	WBGene00015281	chrIV:6638302-6639253	q1	q2	NOTEST	0.0148661	0.193802	3.70448	-0.940552	0.346934	1	no
C01B10.8	WBGene00015282	chrIV:6635027-6638139	q1	q2	OK	28.6124	26.9009	-0.088987	0.262309	0.793083	0.999993	no
C01B10.9	WBGene00015283	chrIV:6632210-6634961	q1	q2	OK	25.1542	28.2165	0.16574	-0.471444	0.637324	0.999993	no
C01B12.2	WBGene00015285	chrII:19537-22158	q1	q2	OK	22.6208	19.6229	-0.205112	0.518078	0.604404	0.999993	no
C01B12.3	WBGene00015286	chrII:12984-15998	q1	q2	OK	12.8666	17.8276	0.470485	-1.16661	0.243368	0.999993	no
C01B12.4	WBGene00015287	chrII:6663-9233	q1	q2	OK	0.534717	0.760068	0.507353	-0.665212	0.505915	0.999993	no
C01B12.5	WBGene00015288	chrII:9807-11826	q1	q2	OK	0.309094	0.40558	0.391942	-0.502584	0.615256	0.999993	no
C01B12.8	WBGene00015291	chrII:23329-28418	q1	q2	OK	24.077	22.7607	-0.0811103	0.185117	0.853137	0.999993	no
C01B4.9	WBGene00015273	chrV:2483002-2487784	q1	q2	NOTEST	0	0.117302	1.79769e+308	1.79769e+308	0.242912	1	no
C01B7.3	WBGene00015275	chrV:8783399-8784143	q1	q2	OK	2.29646	3.13186	0.447609	-0.584569	0.558837	0.999993	no
C01B7.5	WBGene00015276	chrV:8800128-8800974	q1	q2	OK	2.99487	3.31746	0.147586	-0.193934	0.846228	0.999993	no
C01B7.7	WBGene00015277	chrV:8863937-8864630	q1	q2	NOTEST	0.0844306	0.100567	0.252312	-0.137754	0.890435	1	no
C01B9.1	WBGene00007220	chrII:13771505-13778946	q1	q2	OK	0.502401	0.612201	0.285167	-0.398008	0.690624	0.999993	no
C01C10.2	WBGene00015294	chrX:7433596-7437908	q1	q2	OK	4.11937	5.18929	0.333116	-0.301894	0.762733	0.999993	no
C01C4.2	WBGene00015292	chrX:3716300-3718553	q1	q2	NOTEST	0.0561737	0.0641861	0.192365	-0.110298	0.912173	1	no
C01C4.3	WBGene00015293	chrX:3706728-3713313	q1	q2	OK	0.531855	0.550784	0.0504546	-0.0473939	0.962199	0.999993	no
C01F1.1	WBGene00015296	chrII:4301608-4305279	q1	q2	OK	50.2698	50.8647	0.0169745	-0.0532927	0.957499	0.999993	no
C01F1.2	WBGene00015297	chrII:4299659-4300841	q1	q2	OK	31.0999	29.9802	-0.0528984	0.135028	0.892589	0.999993	no
C01F1.3	WBGene00015298	chrII:4295102-4299008	q1	q2	OK	111.04	130.772	0.235974	-0.644224	0.51943	0.999993	no
C01F1.4	WBGene00015299	chrII:4276215-4279128	q1	q2	OK	0.615287	0.628873	0.0315106	-0.0410058	0.967291	0.999993	no
C01F1.5	WBGene00015300	chrII:4279790-4281830	q1	q2	OK	6.40323	8.06193	0.332326	-0.579126	0.562504	0.999993	no
C01F1.6	WBGene00015301	chrII:4282591-4288212	q1	q2	OK	14.8473	13.7963	-0.105921	0.24424	0.807045	0.999993	no
C01F4.2	WBGene00015303	chrI:4848989-4867826	q1	q2	OK	1.03885	1.20567	0.214846	-0.150204	0.880604	0.999993	no
C01F6.1	WBGene00007221	chrIV:9096826-9101570	q1	q2	OK	21.9681	16.8839	-0.379767	1.05577	0.291074	0.999993	no
C01F6.2	WBGene00007222	chrIV:9096826-9101570	q1	q2	OK	0.334651	0.37061	0.147242	-0.0412173	0.967123	0.999993	no
C01F6.9	WBGene00007223	chrIV:9095738-9096214	q1	q2	OK	134.203	96.3032	-0.478766	1.15489	0.248134	0.999993	no
C01G10.1	WBGene00007230	chrV:15100316-15104372	q1	q2	NOTEST	0.167429	0.197215	0.236222	-0.325028	0.74516	1	no
C01G10.10	WBGene00007237	chrV:15080148-15082462	q1	q2	OK	18.4871	18.4806	-0.000510806	0.00122586	0.999022	0.999993	no
C01G10.14	WBGene00007239	chrV:15105358-15105910	q1	q2	OK	0.155938	0.357078	1.19527	-0.870118	0.384236	0.999993	no
C01G10.15	WBGene00007240	chrV:15085729-15087279	q1	q2	OK	1.01594	1.16247	0.194379	-0.029008	0.976858	0.999993	no
C01G10.16	WBGene00007241	chrV:15093192-15094301	q1	q2	OK	1.51999	2.59559	0.772004	-0.667125	0.504692	0.999993	no
C01G10.17	WBGene00044658	chrV:15090770-15091045	q1	q2	NOTEST	0.0937275	0	-1.79769e+308	-1.79769e+308	0.350037	1	no
C01G10.18	WBGene00077583	chrV:15088409-15088682	q1	q2	NOTEST	0	0	0	0	1	1	no
C01G10.4	WBGene00007231	chrV:15089737-15090004	q1	q2	NOTEST	0	0.273423	1.79769e+308	1.79769e+308	0.285806	1	no
C01G10.5	WBGene00007232	chrV:15089084-15089482	q1	q2	OK	0.520736	0.665095	0.353009	-0.160076	0.872821	0.999993	no
C01G10.6	WBGene00007233	chrV:15087638-15088280	q1	q2	NOTEST	0.0268815	0.190753	2.82702	-0.698839	0.484652	1	no
C01G10.7	WBGene00007234	chrV:15085729-15087279	q1	q2	OK	34.1694	31.5308	-0.115944	0.307993	0.758088	0.999993	no
C01G10.8	WBGene00007235	chrV:15082746-15085368	q1	q2	OK	285.847	300.972	0.0743866	-0.274542	0.783668	0.999993	no
C01G10.9	WBGene00007236	chrV:15082746-15085368	q1	q2	OK	39.038	44.4275	0.186573	-0.253207	0.800108	0.999993	no
C01G12.1	WBGene00007242	chrII:14573539-14576442	q1	q2	OK	9.39457	8.05908	-0.221211	0.476976	0.633379	0.999993	no
C01G12.13	WBGene00044333	chrII:14576881-14577996	q1	q2	NOTEST	0.119285	0.0639145	-0.900198	0.587369	0.556956	1	no
C01G12.3	WBGene00007244	chrII:14581429-14582207	q1	q2	OK	29.893	30.5065	0.0293092	-0.061987	0.950573	0.999993	no
C01G12.5	WBGene00007245	chrII:14586451-14587432	q1	q2	OK	0.958585	1.02465	0.0961585	-0.131031	0.895751	0.999993	no
C01G12.7	WBGene00007247	chrII:14588568-14591818	q1	q2	OK	0.546119	0.765968	0.48807	-0.696239	0.486279	0.999993	no
C01G12.8	WBGene00007248	chrII:14593448-14597542	q1	q2	OK	0.30932	0.542274	0.809924	-1.19537	0.231941	0.999993	no
C01G12.9	WBGene00007249	chrII:14579232-14579949	q1	q2	NOTEST	0.167729	0.167647	-0.00071072	0.000498518	0.999602	1	no
C01G5.3	WBGene00015305	chrIV:6536223-6538989	q1	q2	OK	1.24143	1.23316	-0.00964359	0.0146627	0.988301	0.999993	no
C01G5.4	WBGene00015306	chrIV:6531767-6535627	q1	q2	NOTEST	0.018541	0.0116518	-0.670166	0.392085	0.694996	1	no
C01G5.5	WBGene00015307	chrIV:6524628-6526397	q1	q2	OK	36.9154	38.7156	0.0686944	-0.170161	0.864884	0.999993	no
C01G5.6	WBGene00015308	chrIV:6522862-6524448	q1	q2	OK	120.394	108.545	-0.14947	0.516502	0.605504	0.999993	no
C01G5.7	WBGene00015309	chrIV:6518162-6519023	q1	q2	OK	2.77431	2.69961	-0.0393791	0.052529	0.958107	0.999993	no
C01G5.8	WBGene00015310	chrIV:6548902-6555879	q1	q2	OK	21.9173	21.4357	-0.0320505	0.0788979	0.937114	0.999993	no
C01G5.9	WBGene00015311	chrIV:6519963-6522207	q1	q2	OK	9.93448	13.6848	0.462054	-0.96594	0.334074	0.999993	no
C01G6.2	WBGene00007224	chrII:9267470-9268243	q1	q2	OK	2.84327	4.03739	0.505871	-0.769775	0.441434	0.999993	no
C01G6.3	WBGene00007225	chrII:9269833-9271207	q1	q2	OK	691.765	646.687	-0.0972162	0.394319	0.693345	0.999993	no
C01G6.4	WBGene00007226	chrII:9271238-9272982	q1	q2	OK	30.732	24.4917	-0.327448	0.785234	0.432317	0.999993	no
C01G6.5	WBGene00007227	chrII:9274908-9280038	q1	q2	OK	64.0238	58.2479	-0.136402	0.514554	0.606865	0.999993	no
C01G6.7	WBGene00007228	chrII:9291956-9293977	q1	q2	OK	23.1175	34.7017	0.58602	-1.60575	0.108328	0.999993	no
C01G6.9	WBGene00007229	chrII:9294044-9295693	q1	q2	OK	21.9514	28.5579	0.379579	-0.89151	0.372656	0.999993	no
C01G8.1	WBGene00015312	chrI:5272849-5274325	q1	q2	OK	57.3733	39.5829	-0.535501	1.27679	0.201676	0.999993	no
C01G8.6	WBGene00015313	chrI:5298780-5300334	q1	q2	OK	4.27238	2.82317	-0.597726	1.02118	0.307171	0.999993	no
C01H6.2	WBGene00007252	chrI:7204571-7207715	q1	q2	OK	4.28529	4.58294	0.0968796	-0.188683	0.850341	0.999993	no
C01H6.3	WBGene00007253	chrI:7208286-7209684	q1	q2	OK	1.62315	1.68667	0.0553777	-0.0752256	0.940035	0.999993	no
C01H6.4	WBGene00007254	chrI:7210540-7212577	q1	q2	OK	2.40815	3.12734	0.377008	-0.608236	0.543031	0.999993	no
C01H6.6	WBGene00007255	chrI:7222463-7224133	q1	q2	OK	3.87287	3.73048	-0.0540434	0.0941703	0.924974	0.999993	no
C01H6.8	WBGene00007257	chrI:7227861-7229430	q1	q2	OK	33.5984	42.2205	0.32955	-0.688676	0.491027	0.999993	no
C01H6.9	WBGene00007258	chrI:7229433-7233118	q1	q2	OK	28.5831	26.4612	-0.111287	0.354794	0.722744	0.999993	no
C02B10.2	WBGene00015327	chrIV:5090281-5091025	q1	q2	OK	35.8311	25.464	-0.492755	1.08356	0.27856	0.999993	no
C02B10.3	WBGene00015328	chrIV:5092806-5103273	q1	q2	OK	46.18	49.2945	0.0941562	-0.283764	0.776591	0.999993	no
C02B10.4	WBGene00015329	chrIV:5091575-5092795	q1	q2	OK	328.912	338.918	0.0432346	-0.163734	0.86994	0.999993	no
C02B10.5	WBGene00015330	chrIV:5083321-5088856	q1	q2	OK	29.3519	25.1728	-0.221593	0.60995	0.541895	0.999993	no
C02B4.3	WBGene00007259	chrX:12658404-12660991	q1	q2	NOTEST	0.117954	0	-1.79769e+308	-1.79769e+308	0.116293	1	no
C02B4.4	WBGene00045386	chrX:12662425-12663553	q1	q2	OK	3.20463	2.07091	-0.629894	0.832031	0.405391	0.999993	no
C02B8.1	WBGene00015320	chrX:8147660-8148539	q1	q2	OK	2.79804	3.07947	0.138265	-0.207182	0.835868	0.999993	no
C02B8.3	WBGene00015322	chrX:8139472-8140184	q1	q2	NOTEST	0.159073	0.0522091	-1.60732	0.834668	0.403905	1	no
C02B8.5	WBGene00015323	chrX:8120360-8125707	q1	q2	NOTEST	0.0876255	0.093511	0.0937849	-0.0860304	0.931442	1	no
C02B8.6	WBGene00015324	chrX:8133125-8136279	q1	q2	OK	22.8517	20.1266	-0.183198	0.491124	0.623339	0.999993	no
C02B8.7	WBGene00015325	chrX:8137671-8137830	q1	q2	OK	0.601522	0.863204	0.521086	-0.13735	0.890754	0.999993	no
C02C2.4	WBGene00015333	chrIII:7862512-7865222	q1	q2	OK	0.484683	0.662325	0.450497	-0.62494	0.532011	0.999993	no
C02C2.5	WBGene00015334	chrIII:7877180-7878774	q1	q2	OK	3.29717	5.15496	0.644732	-1.00597	0.31443	0.999993	no
C02C6.3	WBGene00007261	chrX:15546638-15552165	q1	q2	OK	21.2384	14.1591	-0.584941	0.310084	0.756497	0.999993	no
C02D5.2	WBGene00015336	chrIII:8557254-8559114	q1	q2	OK	22.5219	22.5683	0.0029715	-0.00636879	0.994918	0.999993	no
C02E11.1	WBGene00015344	chrV:1042692-1048583	q1	q2	OK	79.0238	79.9219	0.0163034	-0.0509918	0.959332	0.999993	no
C02E7.1	WBGene00015338	chrV:4934785-4939071	q1	q2	NOTEST	0.0253904	0.0256677	0.0156695	-0.0113647	0.990932	1	no
C02E7.10	WBGene00015342	chrV:4930802-4933013	q1	q2	NOTEST	0.0467621	0	-1.79769e+308	-1.79769e+308	0.119618	1	no
C02E7.6	WBGene00015339	chrV:4919192-4919567	q1	q2	OK	812.556	930.616	0.195718	-0.603092	0.546447	0.999993	no
C02E7.7	WBGene00015340	chrV:4918139-4918571	q1	q2	OK	240.579	189.256	-0.346171	0.757336	0.448849	0.999993	no
C02E7.8	WBGene00015341	chrV:4920327-4920776	q1	q2	OK	0.713558	0.312072	-1.19315	0.556208	0.578069	0.999993	no
C02F12.10	WBGene00045215	chrX:3672364-3673675	q1	q2	OK	0.600634	0.782413	0.381443	-0.401074	0.688365	0.999993	no
C02F12.3	WBGene00015354	chrX:3668082-3668929	q1	q2	OK	0.506382	0.312732	-0.695297	0.694902	0.487117	0.999993	no
C02F12.5	WBGene00015355	chrX:3670359-3672045	q1	q2	OK	0.282484	0.180205	-0.648527	0.52725	0.59802	0.999993	no
C02F12.8	WBGene00015357	chrX:3690153-3693225	q1	q2	OK	11.933	9.72828	-0.294697	0.720444	0.471251	0.999993	no
C02F12.9	WBGene00015358	chrX:3696889-3700794	q1	q2	NOTEST	0.0641506	0.152066	1.24516	-0.828759	0.407241	1	no
C02F4.4	WBGene00007264	chrIV:10513872-10515101	q1	q2	OK	5.52529	5.87375	0.0882326	-0.137601	0.890556	0.999993	no
C02F4.5	WBGene00007265	chrIV:10523414-10524125	q1	q2	OK	0.598831	0.255118	-1.23098	0.390585	0.696104	0.999993	no
C02F5.10	WBGene00015351	chrIII:8248719-8249410	q1	q2	OK	5.14913	7.1852	0.4807	-0.727954	0.466642	0.999993	no
C02F5.12	WBGene00015352	chrIII:8240846-8242932	q1	q2	OK	34.2676	40.2905	0.233593	-0.648683	0.516544	0.999993	no
C02F5.13	WBGene00015353	chrIII:8247279-8248582	q1	q2	OK	62.1712	56.0142	-0.150454	0.378061	0.705385	0.999993	no
C02F5.14	WBGene00044445	chrIII:8226406-8235458	q1	q2	OK	6.95306	8.66492	0.317538	-0.164933	0.868997	0.999993	no
C02F5.2	WBGene00015345	chrIII:8249565-8249916	q1	q2	OK	3.65549	3.84169	0.0716759	-0.0830417	0.933818	0.999993	no
C02F5.3	WBGene00015346	chrIII:8245819-8247186	q1	q2	OK	127.628	146.037	0.194391	-0.689576	0.490461	0.999993	no
C02F5.5	WBGene00015348	chrIII:8236140-8236786	q1	q2	OK	0.582082	1.4992	1.3649	-1.51894	0.128778	0.999993	no
C02F5.6	WBGene00015349	chrIII:8226406-8235458	q1	q2	OK	40.0404	44.0872	0.138901	-0.364213	0.715699	0.999993	no
C02F5.7	WBGene00015350	chrIII:8226406-8235458	q1	q2	OK	6.34815	7.18105	0.17786	-0.267341	0.789207	0.999993	no
C02G6.3	WBGene00044803	chrV:5881114-5882433	q1	q2	OK	3.32067	3.33225	0.00502353	-0.00686314	0.994524	0.999993	no
C02H6.1	WBGene00015361	chrV:7388370-7389852	q1	q2	NOTEST	0.0142301	0.0377795	1.40865	-0.521395	0.602091	1	no
C02H7.2	WBGene00015364	chrX:732496-735671	q1	q2	OK	0.354077	0.424346	0.26118	-0.313329	0.754031	0.999993	no
C03A3.1	WBGene00007266	chrX:11257295-11260160	q1	q2	OK	24.6875	24.4519	-0.0138344	0.0331128	0.973585	0.999993	no
C03A3.2	WBGene00007267	chrX:11262780-11266247	q1	q2	OK	5.89573	5.24696	-0.168189	0.341976	0.732369	0.999993	no
C03A3.3	WBGene00007268	chrX:11267325-11268958	q1	q2	OK	1.04177	1.44304	0.470075	-0.631368	0.5278	0.999993	no
C03A7.12	WBGene00015370	chrV:5178363-5181440	q1	q2	OK	2.03583	2.29506	0.172917	-0.25303	0.800245	0.999993	no
C03A7.13	WBGene00015371	chrV:5191113-5192515	q1	q2	OK	2.55435	2.94616	0.20588	-0.320883	0.748299	0.999993	no
C03B1.1	WBGene00015372	chrX:6373611-6375555	q1	q2	OK	0.299241	0.493796	0.722604	-0.860364	0.389588	0.999993	no
C03B1.10	WBGene00015380	chrX:6357710-6357919	q1	q2	OK	1.61651	7.55475	2.2245	-1.16193	0.245262	0.999993	no
C03B1.13	WBGene00015381	chrX:6335305-6337719	q1	q2	OK	10.5563	11.0164	0.0615538	-0.128123	0.898051	0.999993	no
C03B1.14	WBGene00015382	chrX:6359427-6360710	q1	q2	OK	0.780762	1.49916	0.941202	-1.23609	0.216425	0.999993	no
C03B1.2	WBGene00015373	chrX:6367577-6373121	q1	q2	NOTEST	0.154003	0.0637401	-1.27269	0.832803	0.404956	1	no
C03B1.3	WBGene00015374	chrX:6365976-6366795	q1	q2	NOTEST	0.055902	0.0635139	0.184174	-0.0486762	0.961177	1	no
C03B1.4	WBGene00015375	chrX:6364459-6365681	q1	q2	NOTEST	0.174856	0.149303	-0.227922	0.177776	0.858899	1	no
C03B1.5	WBGene00015376	chrX:6355548-6357653	q1	q2	OK	0.700517	0.624198	-0.166418	0.219744	0.826071	0.999993	no
C03B1.6	WBGene00015377	chrX:6350150-6351840	q1	q2	NOTEST	0.00690767	0.0400002	2.53374	-0.232212	0.816374	1	no
C03B1.7	WBGene00015378	chrX:6342119-6345609	q1	q2	OK	10.3432	11.5194	0.155387	-0.386836	0.698877	0.999993	no
C03B1.9	WBGene00015379	chrX:6346322-6347077	q1	q2	NOTEST	0.0979683	0	-1.79769e+308	-1.79769e+308	0.123297	1	no
C03B8.1	C03B8.1	chrIII:7716701-7717235	q1	q2	OK	1.37893	2.5317	0.876555	-0.96815	0.33297	0.999993	no
C03B8.2	WBGene00015385	chrIII:7716100-7716381	q1	q2	OK	41.867	41.3723	-0.0171505	0.0239056	0.980928	0.999993	no
C03B8.3	WBGene00015386	chrIII:7712386-7712881	q1	q2	OK	0.644689	2.11768	1.71581	-1.77555	0.0758063	0.999993	no
C03C10.2	WBGene00007269	chrIII:4090814-4093254	q1	q2	OK	2.66839	2.41694	-0.14279	0.226661	0.820687	0.999993	no
C03C10.4	WBGene00007270	chrIII:4096018-4098102	q1	q2	OK	132.765	131.706	-0.0115507	0.0386087	0.969202	0.999993	no
C03C10.5	WBGene00007271	chrIII:4090265-4090532	q1	q2	OK	315.888	382.574	0.276324	-0.577355	0.5637	0.999993	no
C03C10.7	WBGene00007273	chrIII:4096018-4098102	q1	q2	OK	0.54572	0.704505	0.368448	-0.0571936	0.954391	0.999993	no
C03C11.1	WBGene00007274	chrI:10014725-10015427	q1	q2	OK	0.289509	0.401637	0.472281	-0.448831	0.653553	0.999993	no
C03D6.1	WBGene00007275	chrI:9665245-9670706	q1	q2	OK	1.17581	1.03576	-0.182956	0.0381552	0.969564	0.999993	no
C03D6.6	WBGene00007278	chrI:9657099-9657820	q1	q2	OK	30.1251	28.5886	-0.0755216	0.157765	0.874642	0.999993	no
C03E10.1	WBGene00007279	chrV:11291169-11292551	q1	q2	NOTEST	0	0.0151721	1.79769e+308	1.79769e+308	0.285806	1	no
C03E10.3	WBGene00007281	chrV:11286987-11288208	q1	q2	OK	0.336078	0.388084	0.207571	-0.252102	0.800962	0.999993	no
C03F11.1	WBGene00015387	chrX:5390697-5394108	q1	q2	OK	0.414099	0.491794	0.248077	-0.325071	0.745127	0.999993	no
C03F11.2	WBGene00015388	chrX:5394530-5396896	q1	q2	OK	0.845921	1.00316	0.245957	-0.306091	0.759535	0.999993	no
C03F11.4	WBGene00015390	chrX:5401452-5406395	q1	q2	OK	0.890112	1.25262	0.492891	-0.677969	0.497791	0.999993	no
C03G6.17	WBGene00015402	chrV:7379735-7381051	q1	q2	OK	0.969337	1.24235	0.358002	-0.475969	0.634097	0.999993	no
C03G6.5	WBGene00015393	chrV:7365235-7365906	q1	q2	OK	0.408835	0.218777	-0.902059	0.769467	0.441616	0.999993	no
C03G6.6	WBGene00015394	chrV:7357432-7358864	q1	q2	NOTEST	0.13678	0.20558	0.587847	-0.526185	0.59876	1	no
C03H12.1	WBGene00007284	chrX:15689389-15696290	q1	q2	OK	37.7965	42.4635	0.167971	-0.547182	0.584254	0.999993	no
C03H5.2	WBGene00015404	chrII:388832-392728	q1	q2	OK	25.001	20.557	-0.282358	0.696693	0.485995	0.999993	no
C03H5.3	WBGene00015405	chrII:386193-387920	q1	q2	OK	86.8058	86.1208	-0.0114303	0.0363031	0.971041	0.999993	no
C03H5.5	WBGene00015407	chrII:382272-385354	q1	q2	OK	4.32269	4.17423	-0.0504188	0.0941432	0.924995	0.999993	no
C03H5.6	WBGene00015408	chrII:392813-399976	q1	q2	OK	0.80993	0.569048	-0.509247	0.650015	0.515682	0.999993	no
C03H5.7	WBGene00015409	chrII:380572-382256	q1	q2	OK	1.32256	1.16641	-0.181266	0.268472	0.788336	0.999993	no
C04A11.1	WBGene00007285	chrX:13660448-13662893	q1	q2	OK	1.77846	1.72578	-0.0433789	0.0606085	0.951671	0.999993	no
C04A11.2	WBGene00007286	chrX:13665898-13668742	q1	q2	OK	17.4019	16.343	-0.0905703	0.22531	0.821738	0.999993	no
C04A11.5	WBGene00007288	chrX:13664518-13665060	q1	q2	OK	1.15346	0.620818	-0.89373	0.621592	0.53421	0.999993	no
C04B4.1	WBGene00007289	chrX:12280708-12282489	q1	q2	NOTEST	0.0464516	0.00701569	-2.72707	0.946935	0.343672	1	no
C04B4.2	WBGene00007290	chrX:12283252-12285211	q1	q2	OK	23.6391	15.6365	-0.596253	1.5299	0.126043	0.999993	no
C04B4.4	WBGene00007292	chrX:12289910-12293199	q1	q2	NOTEST	0.00919966	0.0569361	2.62969	-1.06741	0.285787	1	no
C04B4.5	WBGene00007293	chrX:12287590-12288286	q1	q2	NOTEST	0	0	0	0	1	1	no
C04B4.6	WBGene00007294	chrX:12275105-12275609	q1	q2	NOTEST	0	0	0	0	1	1	no
C04C11.1	WBGene00007295	chrX:14020716-14022340	q1	q2	OK	1.33525	1.17345	-0.186355	0.259525	0.79523	0.999993	no
C04C11.2	WBGene00007296	chrX:14033731-14037363	q1	q2	OK	49.1972	45.708	-0.106127	0.357004	0.721089	0.999993	no
C04C3.3	WBGene00015413	chrIV:3399666-3403900	q1	q2	OK	17.1865	13.3198	-0.367702	0.845716	0.397711	0.999993	no
C04C3.4	WBGene00015414	chrIV:3394362-3394642	q1	q2	OK	7.58283	7.51373	-0.0132079	0.0129587	0.989661	0.999993	no
C04C3.6	WBGene00015416	chrIV:3419809-3422604	q1	q2	NOTEST	0.0175575	0.0629891	1.84301	-0.804716	0.420984	1	no
C04C3.7	WBGene00015417	chrIV:3432980-3433484	q1	q2	NOTEST	0	0.0604125	1.79769e+308	1.79769e+308	0.264219	1	no
C04E12.10	WBGene00015439	chrV:3377532-3381921	q1	q2	NOTEST	0	0.0137926	1.79769e+308	1.79769e+308	0.198501	1	no
C04E12.11	WBGene00015440	chrV:3386487-3388153	q1	q2	NOTEST	0.0587532	0.0823253	0.486669	-0.226888	0.820511	1	no
C04E12.12	WBGene00015441	chrV:3389326-3390949	q1	q2	NOTEST	0.203168	0.239997	0.240348	-0.28165	0.778212	1	no
C04E12.2	WBGene00015433	chrV:3362780-3369874	q1	q2	NOTEST	0.00351573	0.0414734	3.56029	-0.154784	0.876992	1	no
C04E12.4	WBGene00015434	chrV:3362780-3369874	q1	q2	NOTEST	0.0193598	0.029873	0.625779	-0.349769	0.726512	1	no
C04E12.5	WBGene00015435	chrV:3358639-3361090	q1	q2	NOTEST	0.0249623	0.0923596	1.88751	-1.19812	0.23087	1	no
C04E12.6	WBGene00015436	chrV:3354665-3355510	q1	q2	NOTEST	0.0759884	0.146353	0.945604	-0.500128	0.616985	1	no
C04E6.11	WBGene00015425	chrV:5914089-5917831	q1	q2	OK	19.7826	20.6261	0.0602362	-0.180644	0.856647	0.999993	no
C04E6.13	WBGene00015427	chrV:5912739-5913740	q1	q2	OK	2.32842	3.00444	0.367743	-0.404453	0.685879	0.999993	no
C04E6.3	WBGene00015420	chrV:5920103-5920378	q1	q2	NOTEST	0	0	0	0	1	1	no
C04E6.4	WBGene00015421	chrV:5907390-5909603	q1	q2	NOTEST	0.00921454	0	-1.79769e+308	-1.79769e+308	0.260419	1	no
C04E6.5	WBGene00015422	chrV:5902194-5904814	q1	q2	NOTEST	0.00297334	0.0247082	3.05483	-0.76128	0.44649	1	no
C04E6.7	WBGene00015423	chrV:5893308-5895194	q1	q2	OK	1.28621	1.75001	0.44423	-0.611071	0.541152	0.999993	no
C04E6.8	WBGene00015424	chrV:5883415-5883787	q1	q2	OK	0.444196	0.543461	0.290983	-0.221654	0.824583	0.999993	no
C04E7.1	WBGene00015428	chrX:358672-360198	q1	q2	NOTEST	0.170485	0.067048	-1.34638	0.431615	0.666022	1	no
C04E7.3	WBGene00015430	chrX:344126-346289	q1	q2	OK	7.96741	8.5649	0.104326	-0.218425	0.827098	0.999993	no
C04E7.4	WBGene00015431	chrX:325961-341232	q1	q2	OK	3.13361	3.49309	0.15668	-0.16601	0.868149	0.999993	no
C04E7.5	WBGene00045270	chrX:360778-362938	q1	q2	OK	0.646427	0.242763	-1.41294	1.07965	0.280299	0.999993	no
C04F1.1	WBGene00015442	chrI:5726386-5729310	q1	q2	NOTEST	0.00537769	0.0496109	3.2056	-0.800595	0.423366	1	no
C04F12.1	WBGene00007297	chrI:9673658-9678544	q1	q2	OK	11.2198	9.0836	-0.304716	0.782549	0.433892	0.999993	no
C04F12.12	WBGene00077685	chrI:9694612-9695026	q1	q2	NOTEST	0.0390714	0.049843	0.351278	-0.0955446	0.923882	1	no
C04F12.5	WBGene00007299	chrI:9690120-9690548	q1	q2	OK	20.7337	16.3985	-0.338413	0.564663	0.572303	0.999993	no
C04F12.6	WBGene00007300	chrI:9692650-9693772	q1	q2	NOTEST	0.0899845	0.118654	0.399018	-0.285947	0.774918	1	no
C04F12.7	WBGene00007301	chrI:9695701-9696753	q1	q2	OK	0.361953	0.41267	0.189186	-0.183418	0.85447	0.999993	no
C04F12.8	WBGene00007302	chrI:9697584-9699546	q1	q2	OK	3.64296	4.02812	0.144997	-0.226031	0.821178	0.999993	no
C04F5.2	WBGene00015444	chrV:5093699-5096262	q1	q2	NOTEST	0.0990565	0.125013	0.335756	-0.177053	0.859466	1	no
C04F5.8	WBGene00015450	chrV:5111515-5113739	q1	q2	OK	54.1157	55.2601	0.0301914	-0.0874965	0.930277	0.999993	no
C04F5.9	WBGene00015451	chrV:5114733-5119194	q1	q2	OK	9.88127	8.18727	-0.271314	0.592907	0.553243	0.999993	no
C04F6.2	C04F6.2	chrX:3397137-3397454	q1	q2	OK	3.97582	4.73905	0.253345	-0.296577	0.766789	0.999993	no
C04G2.10	WBGene00007309	chrIV:10115368-10118062	q1	q2	OK	0.388789	0.307482	-0.338485	0.415432	0.677826	0.999993	no
C04G2.11	WBGene00007310	chrIV:10119437-10122367	q1	q2	OK	0.486964	0.346806	-0.489688	0.619167	0.535806	0.999993	no
C04G2.2	WBGene00007305	chrIV:10090712-10092314	q1	q2	OK	0.176857	0.346108	0.968638	-1.05665	0.290671	0.999993	no
C04G2.5	WBGene00007306	chrIV:10094230-10095204	q1	q2	NOTEST	0.142359	0.167773	0.236986	-0.172749	0.862849	1	no
C04G2.8	WBGene00007307	chrIV:10110796-10111556	q1	q2	NOTEST	0.118704	0.289585	1.28662	-1.04341	0.296757	1	no
C04G2.9	WBGene00007308	chrIV:10112868-10114191	q1	q2	NOTEST	0.0779946	0.0794101	0.0259473	-0.0204354	0.983696	1	no
C04G6.10	WBGene00015458	chrII:5101975-5102638	q1	q2	OK	1.93848	2.34632	0.275471	-0.332649	0.739399	0.999993	no
C04G6.11	WBGene00015459	chrII:5103331-5103825	q1	q2	NOTEST	0.0759494	0	-1.79769e+308	-1.79769e+308	0.233794	1	no
C04G6.13	WBGene00077489	chrII:5095009-5095362	q1	q2	NOTEST	0.0389805	0.253262	2.69981	-0.661753	0.508129	1	no
C04G6.2	WBGene00015453	chrII:5093227-5094204	q1	q2	OK	0.568189	0.560631	-0.0193187	0.0224033	0.982126	0.999993	no
C04G6.4	WBGene00015454	chrII:5081487-5083433	q1	q2	OK	21.6013	16.9686	-0.348256	0.87344	0.382424	0.999993	no
C04G6.5	WBGene00015455	chrII:5083844-5091628	q1	q2	OK	9.78867	11.0232	0.171352	-0.0504047	0.9598	0.999993	no
C04G6.6	WBGene00015456	chrII:5099428-5099740	q1	q2	OK	1.43326	1.06109	-0.433744	0.415141	0.678038	0.999993	no
C04G6.7	WBGene00015457	chrII:5100402-5101774	q1	q2	OK	1.9842	1.92958	-0.0402709	0.0489916	0.960926	0.999993	no
C04H4.1	WBGene00007311	chrII:7958792-7960186	q1	q2	OK	0.688423	0.156036	-2.14141	0.771049	0.440678	0.999993	no
C04H5.1	WBGene00007312	chrII:14534224-14535040	q1	q2	OK	61.6257	55.1307	-0.160678	0.329454	0.741812	0.999993	no
C04H5.7	WBGene00007315	chrII:14537915-14538328	q1	q2	OK	0.392537	0.645852	0.718376	-0.374915	0.707724	0.999993	no
C05A9.2	WBGene00007317	chrX:10842621-10844609	q1	q2	OK	72.4833	69.2043	-0.0667871	0.186855	0.851775	0.999993	no
C05A9.3	WBGene00196216	chrX:10826663-10828891	q1	q2	OK	3.12477	3.4385	0.138026	-0.213043	0.831294	0.999993	no
C05A9.4	WBGene00197473	chrX:10829740-10833503	q1	q2	OK	4.18427	4.37296	0.0636357	-0.0919565	0.926733	0.999993	no
C05B5.1	WBGene00007319	chrIII:9987497-9988332	q1	q2	OK	0.17119	0.365228	1.0932	-0.764989	0.444278	0.999993	no
C05B5.11	WBGene00045242	chrIII:10004422-10004875	q1	q2	OK	0.590593	0.886297	0.585626	-0.594887	0.551919	0.999993	no
C05B5.2	WBGene00007320	chrIII:9998452-10000427	q1	q2	NOTEST	0.0869714	0.0496986	-0.807335	0.527828	0.597619	1	no
C05B5.4	WBGene00007321	chrIII:9993795-9996018	q1	q2	OK	14.6682	13.867	-0.0810371	0.166855	0.867484	0.999993	no
C05B5.5	WBGene00007322	chrIII:10001310-10003024	q1	q2	OK	0.292235	0.392884	0.426974	-0.522354	0.601424	0.999993	no
C05B5.8	WBGene00007324	chrIII:10005366-10006694	q1	q2	OK	30.8131	42.0785	0.449537	-0.959743	0.337185	0.999993	no
C05C10.1	WBGene00007328	chrII:9918065-9920509	q1	q2	OK	0.737698	0.701695	-0.0721857	0.0987428	0.921342	0.999993	no
C05C10.2	WBGene00007329	chrII:9922188-9930771	q1	q2	OK	83.9888	97.9433	0.22175	-0.821817	0.411181	0.999993	no
C05C10.3	WBGene00007330	chrII:9931785-9936836	q1	q2	OK	49.3344	51.4086	0.0594168	-0.189499	0.849702	0.999993	no
C05C10.4	WBGene00007331	chrII:9931785-9936836	q1	q2	OK	0.455199	0.592954	0.381423	-0.104997	0.916378	0.999993	no
C05C10.5	WBGene00007332	chrII:9939094-9940278	q1	q2	OK	118.432	74.7004	-0.664874	1.73926	0.0819891	0.999993	no
C05C10.7	WBGene00007334	chrII:9938052-9938903	q1	q2	OK	4.06862	3.30196	-0.301214	0.465917	0.641275	0.999993	no
C05C10.8	WBGene00086567	chrII:9917101-9917880	q1	q2	NOTEST	0.173821	0.0544314	-1.67509	0.539995	0.5892	1	no
C05C12.1	WBGene00007335	chrIV:11248861-11259443	q1	q2	OK	0.394831	0.503596	0.351033	-0.117685	0.906317	0.999993	no
C05C12.4	WBGene00007336	chrIV:11246445-11248030	q1	q2	OK	6.98121	8.05371	0.206175	-0.341511	0.732719	0.999993	no
C05C12.5	WBGene00007337	chrIV:11260410-11261148	q1	q2	NOTEST	0.0379915	0.0435565	0.197211	-0.0626372	0.950055	1	no
C05C12.6	WBGene00007338	chrIV:11231647-11233101	q1	q2	OK	0.39536	0.327941	-0.269732	0.305289	0.760146	0.999993	no
C05C8.1	WBGene00015460	chrV:7239752-7241342	q1	q2	OK	43.1758	44.9179	0.0570685	-0.130884	0.895867	0.999993	no
C05C8.2	WBGene00015461	chrV:7231171-7234808	q1	q2	OK	113.158	122.723	0.117074	-0.347388	0.7283	0.999993	no
C05C8.5	WBGene00015462	chrV:7231171-7234808	q1	q2	OK	42.6148	39.8008	-0.0985553	0.217035	0.828181	0.999993	no
C05C8.6	WBGene00015463	chrV:7234915-7237112	q1	q2	OK	96.8598	85.5933	-0.1784	0.636418	0.524504	0.999993	no
C05C8.7	WBGene00015464	chrV:7242894-7247279	q1	q2	OK	39.7642	37.7858	-0.0736231	0.234831	0.81434	0.999993	no
C05C8.8	WBGene00015465	chrV:7252306-7255139	q1	q2	NOTEST	0.076463	0.164944	1.10914	-0.986081	0.324093	1	no
C05C8.9	WBGene00015466	chrV:7237379-7239640	q1	q2	OK	51.6594	49.6262	-0.0579296	0.142433	0.886738	0.999993	no
C05C9.1	WBGene00007325	chrX:11160914-11163620	q1	q2	OK	2.06626	2.39718	0.214319	-0.342344	0.732092	0.999993	no
C05C9.2	WBGene00007326	chrX:11152998-11157577	q1	q2	OK	0.527697	0.606509	0.20082	-0.244009	0.807224	0.999993	no
C05C9.3	WBGene00007327	chrX:11142904-11152754	q1	q2	NOTEST	0.191476	0.154669	-0.307983	0.430667	0.66671	1	no
C05D10.1	WBGene00015477	chrIII:6080511-6084686	q1	q2	OK	62.5281	59.8766	-0.0625118	0.181485	0.855987	0.999993	no
C05D10.2	WBGene00015478	chrIII:6067805-6072025	q1	q2	OK	11.5124	13.0651	0.182521	-0.279676	0.779726	0.999993	no
C05D10.4	WBGene00015480	chrIII:6088633-6102810	q1	q2	OK	21.6663	27.2826	0.332529	-0.738843	0.460002	0.999993	no
C05D11.1	WBGene00015481	chrIII:6436555-6439904	q1	q2	OK	78.6887	82.4608	0.0675525	-0.255684	0.798195	0.999993	no
C05D11.10	WBGene00015487	chrIII:6430985-6431740	q1	q2	OK	91.14	94.2658	0.0486503	-0.132794	0.894356	0.999993	no
C05D11.13	WBGene00015488	chrIII:6443062-6443919	q1	q2	OK	30.4496	34.1511	0.165508	-0.395621	0.692385	0.999993	no
C05D11.5	WBGene00015483	chrIII:6409988-6411506	q1	q2	OK	3.6791	4.1352	0.168608	-0.274263	0.783883	0.999993	no
C05D11.7	WBGene00015484	chrIII:6415728-6421659	q1	q2	OK	25.9481	26.1542	0.0114119	-0.0318675	0.974578	0.999993	no
C05D11.8	WBGene00015485	chrIII:6422405-6427252	q1	q2	OK	27.3	27.4598	0.00842268	-0.0259629	0.979287	0.999993	no
C05D11.9	WBGene00015486	chrIII:6427477-6430882	q1	q2	OK	64.4158	70.6926	0.134144	-0.47746	0.633034	0.999993	no
C05D12.1	WBGene00007339	chrII:11412188-11415708	q1	q2	OK	2.44488	2.59821	0.0877515	-0.149434	0.881211	0.999993	no
C05D12.2	WBGene00007340	chrII:11418249-11423317	q1	q2	NOTEST	0.152567	0.198489	0.37962	-0.43931	0.660437	1	no
C05D12.3	WBGene00014666	chrII:11424765-11432702	q1	q2	OK	0.699005	0.597621	-0.226071	0.118618	0.905578	0.999993	no
C05D12.4	WBGene00007341	chrII:11424765-11432702	q1	q2	OK	28.2044	32.5856	0.208312	-0.520125	0.602977	0.999993	no
C05D12.5	WBGene00007342	chrII:11434177-11434894	q1	q2	OK	71.1417	89.3864	0.329359	-0.912559	0.361474	0.999993	no
C05D12.7	WBGene00044029	chrII:11410134-11411460	q1	q2	OK	0.760968	1.69598	1.15621	-0.65395	0.513144	0.999993	no
C05D2.10	WBGene00015470	chrIII:5595729-5600018	q1	q2	OK	95.6688	105.741	0.144411	-0.44697	0.654897	0.999993	no
C05D2.3	WBGene00015467	chrIII:5614929-5617172	q1	q2	NOTEST	0.116622	0.169302	0.537762	-0.566175	0.571275	1	no
C05D2.6	WBGene00015468	chrIII:5600394-5603614	q1	q2	OK	59.3686	52.547	-0.176093	0.473197	0.636073	0.999993	no
C05D2.8	WBGene00015469	chrIII:5604417-5610304	q1	q2	OK	3.33002	4.58145	0.460274	-0.451115	0.651907	0.999993	no
C05D9.3	WBGene00015472	chrX:1111899-1116791	q1	q2	OK	50.2844	52.1214	0.0517661	-0.164555	0.869294	0.999993	no
C05D9.4	WBGene00015473	chrX:1108063-1108413	q1	q2	OK	2.29479	2.74063	0.25615	-0.265115	0.790921	0.999993	no
C05D9.7	WBGene00015474	chrX:1117239-1119404	q1	q2	OK	154.569	174.12	0.17183	-0.581239	0.561079	0.999993	no
C05D9.9	WBGene00015476	chrX:1122484-1124221	q1	q2	OK	0.834181	0.921371	0.143422	-0.110166	0.912278	0.999993	no
C05E11.2	WBGene00015493	chrX:4586889-4587966	q1	q2	NOTEST	0	0.104556	1.79769e+308	1.79769e+308	0.204383	1	no
C05E11.3	WBGene00015494	chrX:4579479-4585638	q1	q2	OK	51.0291	60.0131	0.233958	-0.680388	0.496259	0.999993	no
C05E11.6	WBGene00015495	chrX:4562168-4562811	q1	q2	OK	0.863802	1.23645	0.517432	-0.609228	0.542373	0.999993	no
C05E11.7	WBGene00015496	chrX:4579479-4585638	q1	q2	OK	0.972089	1.00516	0.0482699	-0.0239589	0.980885	0.999993	no
C05E4.12	WBGene00015491	chrV:758039-761954	q1	q2	OK	5.14724	6.26801	0.284209	-0.500502	0.616721	0.999993	no
C05E4.7	WBGene00015489	chrV:742120-742516	q1	q2	NOTEST	0.126503	0.315079	1.31654	-0.613038	0.539851	1	no
C05E7.1	WBGene00007343	chrX:12941370-12943477	q1	q2	OK	13.6654	18.3448	0.42485	-0.842868	0.399303	0.999993	no
C05E7.2	WBGene00007344	chrX:12938626-12940641	q1	q2	OK	5.62647	6.35878	0.176519	-0.267386	0.789172	0.999993	no
C05E7.3	WBGene00007345	chrX:12945545-12946492	q1	q2	OK	1.23565	1.62997	0.399581	-0.501303	0.616158	0.999993	no
C05E7.4	WBGene00007346	chrX:12965414-12968386	q1	q2	NOTEST	0.204394	0.2037	-0.00490855	0.004756	0.996205	1	no
C05G5.1	WBGene00007347	chrX:14734400-14740019	q1	q2	OK	3.86423	5.04688	0.385211	-0.691497	0.489253	0.999993	no
C05G5.2	WBGene00007348	chrX:14747250-14750321	q1	q2	OK	5.69958	5.32999	-0.0967229	0.201743	0.840117	0.999993	no
C05G5.3	WBGene00007349	chrX:14750787-14751942	q1	q2	OK	9.95646	11.334	0.186954	-0.349895	0.726418	0.999993	no
C05G5.4	WBGene00007350	chrX:14753956-14760763	q1	q2	OK	143.06	165.827	0.213059	-0.777073	0.437116	0.999993	no
C05G5.5	WBGene00007351	chrX:14753956-14760763	q1	q2	OK	20.8044	24.1748	0.216614	-0.257096	0.797104	0.999993	no
C05G5.7	WBGene00050939	chrX:14743600-14743711	q1	q2	OK	24.7076	36.4945	0.562725	-0.45154	0.651601	0.999993	no
C06A1.2	WBGene00007353	chrII:10568844-10571798	q1	q2	OK	3.1512	4.16094	0.40101	-0.579085	0.562531	0.999993	no
C06A1.3	WBGene00007354	chrII:10572211-10573987	q1	q2	NOTEST	0.120006	0.161947	0.432413	-0.411091	0.681006	1	no
C06A1.6	WBGene00007356	chrII:10564114-10564618	q1	q2	OK	0.285355	0.12232	-1.2221	0.710508	0.477389	0.999993	no
C06A1.7	WBGene00044235	chrII:10564851-10565341	q1	q2	NOTEST	0.232389	0.173884	-0.418412	0.246903	0.804983	1	no
C06A12.3	WBGene00007357	chrIV:17427690-17429565	q1	q2	OK	3.42875	3.51655	0.0364792	-0.0582443	0.953554	0.999993	no
C06A12.8	WBGene00007359	chrIV:17432939-17439914	q1	q2	NOTEST	0	0.0785972	1.79769e+308	1.79769e+308	0.236568	1	no
C06A5.1	WBGene00015499	chrI:6012059-6021985	q1	q2	OK	29.7339	28.3154	-0.0705254	0.253162	0.800143	0.999993	no
C06A5.10	WBGene00015506	chrI:5978984-5979435	q1	q2	OK	11.7177	17.8758	0.609311	-0.852165	0.394123	0.999993	no
C06A5.12	WBGene00044414	chrI:6004709-6004925	q1	q2	OK	53.4813	40.4879	-0.401543	0.61969	0.535462	0.999993	no
C06A5.2	WBGene00015500	chrI:6006334-6007297	q1	q2	OK	1.38785	0.933844	-0.571599	0.758887	0.44792	0.999993	no
C06A5.3	WBGene00015501	chrI:5986493-5990583	q1	q2	OK	82.1229	86.9025	0.0816141	-0.283814	0.776553	0.999993	no
C06A5.6	WBGene00015504	chrI:5983231-5985871	q1	q2	OK	13.7732	10.1429	-0.441395	1.09432	0.273813	0.999993	no
C06A5.8	WBGene00015505	chrI:6008106-6009608	q1	q2	OK	17.3045	16.0757	-0.106265	0.197787	0.843212	0.999993	no
C06A6.2	WBGene00015507	chrIV:7846629-7854107	q1	q2	OK	58.3911	54.0551	-0.111318	0.354339	0.723084	0.999993	no
C06A6.5	WBGene00015510	chrIV:7830549-7834663	q1	q2	OK	117.908	130.712	0.148737	-0.490547	0.623747	0.999993	no
C06A6.7	WBGene00015511	chrIV:7837360-7837973	q1	q2	OK	0.775325	0.991721	0.355134	-0.419373	0.674943	0.999993	no
C06A8.1	WBGene00015512	chrII:7772514-7777780	q1	q2	OK	63.1105	54.5091	-0.211383	0.626942	0.530697	0.999993	no
C06A8.2	WBGene00015513	chrII:7779299-7781202	q1	q2	OK	71.867	66.4095	-0.113941	0.374493	0.708038	0.999993	no
C06A8.3	WBGene00015514	chrII:7785129-7794267	q1	q2	OK	176.821	125.082	-0.499415	1.64541	0.0998862	0.999993	no
C06A8.6	WBGene00015516	chrII:7772514-7777780	q1	q2	OK	0.366601	0.671254	0.872647	-0.179939	0.8572	0.999993	no
C06A8.8	WBGene00015517	chrII:7765988-7771965	q1	q2	OK	15.9788	17.0526	0.093837	-0.141344	0.887598	0.999993	no
C06B3.1	WBGene00007360	chrV:13902780-13903872	q1	q2	NOTEST	0.029256	0.0166198	-0.815826	0.248138	0.804028	1	no
C06B3.6	WBGene00007365	chrV:13908118-13909499	q1	q2	OK	2.51926	3.69522	0.552658	-0.90692	0.364449	0.999993	no
C06B3.7	WBGene00007366	chrV:13909733-13911510	q1	q2	NOTEST	0.236119	0.220147	-0.101046	0.103739	0.917376	1	no
C06B8.11	WBGene00007373	chrV:15486369-15487100	q1	q2	NOTEST	0	0	0	0	1	1	no
C06B8.2	WBGene00007368	chrV:15476212-15478548	q1	q2	OK	6.62631	7.64337	0.206002	-0.378313	0.705198	0.999993	no
C06B8.7	WBGene00007372	chrV:15498724-15511394	q1	q2	OK	31.0931	31.4018	0.0142532	-0.0557406	0.955548	0.999993	no
C06C3.10	WBGene00044169	chrII:9375802-9378183	q1	q2	OK	9.68354	10.5045	0.117402	-0.156252	0.875835	0.999993	no
C06C3.3	WBGene00007374	chrII:9369118-9372312	q1	q2	OK	1.3935	2.05657	0.56152	-0.857345	0.391254	0.999993	no
C06C3.4	WBGene00007375	chrII:9373231-9375789	q1	q2	OK	8.53126	11.2985	0.405296	-0.853733	0.393253	0.999993	no
C06C3.7	WBGene00007377	chrII:9385488-9386217	q1	q2	OK	7.47477	8.41696	0.17127	-0.260003	0.794862	0.999993	no
C06C3.8	WBGene00007378	chrII:9386524-9390841	q1	q2	OK	0.56174	0.569829	0.0206265	-0.0292749	0.976645	0.999993	no
C06C3.9	WBGene00014668	chrII:9375802-9378183	q1	q2	OK	5.15427	6.38148	0.308123	-0.366231	0.714193	0.999993	no
C06C6.1	WBGene00007379	chrV:16010689-16012092	q1	q2	NOTEST	0.00451396	0.0102572	1.18417	-0.256407	0.797636	1	no
C06C6.6	WBGene00007380	chrV:15988733-15991587	q1	q2	NOTEST	0.00495369	0.0570935	3.52675	-1.47038	0.14146	1	no
C06C6.7	WBGene00007381	chrV:15992185-15995587	q1	q2	NOTEST	0.0190849	0.0314734	0.721701	-0.505284	0.613359	1	no
C06C6.8	WBGene00007382	chrV:15997115-15997748	q1	q2	NOTEST	0.0834479	0.203062	1.28297	-0.597408	0.550235	1	no
C06C6.9	WBGene00007383	chrV:15996193-15996725	q1	q2	NOTEST	0.061252	0	-1.79769e+308	-1.79769e+308	0.303748	1	no
C06E1.1	WBGene00015518	chrIII:8605751-8606424	q1	q2	OK	174.86	164.808	-0.0854142	0.262097	0.793246	0.999993	no
C06E1.11	WBGene00015526	chrIII:8614681-8616130	q1	q2	OK	1.11336	1.22086	0.132983	-0.194789	0.845559	0.999993	no
C06E1.3	WBGene00015519	chrIII:8581021-8583826	q1	q2	OK	2.37522	1.95426	-0.281439	0.456267	0.648198	0.999993	no
C06E1.7	WBGene00015522	chrIII:8591190-8593012	q1	q2	OK	0.707498	0.912462	0.367038	-0.517337	0.604921	0.999993	no
C06E1.8	WBGene00015523	chrIII:8595287-8597790	q1	q2	OK	7.33667	6.87193	-0.0944095	0.1872	0.851504	0.999993	no
C06E1.9	WBGene00015524	chrIII:8606427-8609703	q1	q2	OK	31.7217	33.9116	0.096308	-0.29152	0.770653	0.999993	no
C06E2.1	WBGene00015527	chrX:8872880-8874581	q1	q2	OK	2.99752	3.61895	0.271801	-0.425859	0.67021	0.999993	no
C06E2.2	WBGene00015528	chrX:8879595-8880353	q1	q2	NOTEST	0	0.159912	1.79769e+308	1.79769e+308	0.264219	1	no
C06E2.5	WBGene00015529	chrX:8857004-8857901	q1	q2	OK	79.6193	75.7404	-0.0720544	0.196262	0.844405	0.999993	no
C06E2.9	WBGene00044579	chrX:8861204-8861597	q1	q2	OK	4.38967	4.28007	-0.0364779	0.0460788	0.963247	0.999993	no
C06E4.1	WBGene00015530	chrIV:7283245-7283860	q1	q2	NOTEST	0.115569	0.153288	0.407495	-0.250115	0.802498	1	no
C06E4.2	WBGene00015531	chrIV:7282280-7283075	q1	q2	OK	19.7685	16.5921	-0.252705	0.3652	0.714962	0.999993	no
C06E4.5	WBGene00015534	chrIV:7254978-7256253	q1	q2	NOTEST	0	0.0282738	1.79769e+308	1.79769e+308	0.264219	1	no
C06E4.8	WBGene00015537	chrIV:7284207-7285509	q1	q2	OK	0.150869	0.446175	1.56431	-1.61394	0.106541	0.999993	no
C06E7.1	WBGene00015538	chrIV:5848645-5859965	q1	q2	OK	71.5339	62.8918	-0.185755	0.380655	0.70346	0.999993	no
C06E7.2	WBGene00015539	chrIV:5839387-5846387	q1	q2	OK	5.12123	5.04462	-0.0217457	0.0198227	0.984185	0.999993	no
C06E7.3	WBGene00015540	chrIV:5839387-5846387	q1	q2	OK	75.7923	71.6938	-0.0802013	0.229026	0.818848	0.999993	no
C06E7.4	WBGene00015541	chrIV:5848645-5859965	q1	q2	OK	35.782	36.4772	0.0277631	-0.0628554	0.949882	0.999993	no
C06E8.5	WBGene00015544	chrIII:6990115-7005307	q1	q2	OK	1.81221	1.47559	-0.296456	0.286425	0.774553	0.999993	no
C06G1.1	WBGene00015545	chrX:16633289-16637560	q1	q2	OK	11.083	11.737	0.082721	-0.155457	0.876461	0.999993	no
C06G1.2	WBGene00015546	chrX:16621737-16622666	q1	q2	OK	5.07531	5.11771	0.0120035	-0.0188944	0.984925	0.999993	no
C06G1.5	WBGene00015548	chrX:16638171-16642988	q1	q2	OK	12.6289	14.9678	0.245131	-0.632831	0.526844	0.999993	no
C06G1.6	WBGene00077591	chrX:16652031-16654410	q1	q2	OK	5.34347	5.10413	-0.0661105	0.138642	0.889733	0.999993	no
C06G3.3	WBGene00015549	chrIV:7032704-7036850	q1	q2	OK	7.56894	7.90344	0.0623884	-0.0141587	0.988703	0.999993	no
C06G3.4	WBGene00015550	chrIV:7028446-7030991	q1	q2	NOTEST	0.17459	0.123829	-0.49563	0.572485	0.566994	1	no
C06G3.5	WBGene00015551	chrIV:7024199-7028110	q1	q2	OK	86.8995	106.187	0.289183	-0.960769	0.336668	0.999993	no
C06G3.6	WBGene00015552	chrIV:7017614-7020191	q1	q2	OK	118.799	123.587	0.0570108	-0.213112	0.831239	0.999993	no
C06G3.8	WBGene00015554	chrIV:7031548-7032548	q1	q2	OK	63.5197	58.0455	-0.13002	0.301527	0.763013	0.999993	no
C06G3.9	WBGene00015555	chrIV:7032704-7036850	q1	q2	OK	58.0421	59.9136	0.0457837	-0.159909	0.872953	0.999993	no
C06G4.1	WBGene00015557	chrIII:7987063-7990484	q1	q2	OK	34.4976	30.5949	-0.173207	0.55879	0.576305	0.999993	no
C06G4.4	WBGene00015558	chrIII:7973651-7977736	q1	q2	OK	1.71934	1.71923	-9.12923e-05	1.39362e-05	0.999989	0.999993	no
C06G4.5	WBGene00015559	chrIII:7990723-7996373	q1	q2	OK	0.896476	1.0865	0.277349	-0.406304	0.68452	0.999993	no
C06G4.6	WBGene00044446	chrIII:8004394-8005770	q1	q2	OK	0.493071	0.772449	0.647644	-0.714373	0.474997	0.999993	no
C06G8.1	WBGene00007384	chrIV:10778970-10780691	q1	q2	OK	17.2067	17.8105	0.0497607	-0.120651	0.903968	0.999993	no
C06G8.3	WBGene00014669	chrIV:10799633-10802226	q1	q2	OK	13.2063	13.6049	0.042904	-0.0746953	0.940457	0.999993	no
C06H2.2	WBGene00007386	chrV:11125203-11127283	q1	q2	OK	39.4484	45.0513	0.191602	-0.563817	0.572878	0.999993	no
C06H2.3	WBGene00007387	chrV:11127478-11130065	q1	q2	OK	24.4264	25.0593	0.0369061	-0.101082	0.919486	0.999993	no
C06H2.6	WBGene00007390	chrV:11124284-11125037	q1	q2	OK	20.6573	14.2198	-0.538756	1.04809	0.294595	0.999993	no
C06H2.7	WBGene00007391	chrV:11141479-11144403	q1	q2	OK	37.9777	36.0066	-0.07689	0.203141	0.839025	0.999993	no
C06H5.6	WBGene00007394	chrV:17871378-17888958	q1	q2	OK	6.32141	6.34472	0.00530963	-0.00695608	0.99445	0.999993	no
C06H5.7	WBGene00007395	chrV:17910290-17917208	q1	q2	OK	11.1155	10.4817	-0.0847008	0.181164	0.856239	0.999993	no
C06H5.8	WBGene00044795	chrV:17919010-17921706	q1	q2	OK	1.72354	1.76329	0.0329006	-0.0501062	0.960038	0.999993	no
C07A12.2	WBGene00015560	chrX:4544847-4545390	q1	q2	OK	1.4875	0.310397	-2.26071	0.770812	0.440818	0.999993	no
C07A12.7	WBGene00015561	chrX:4517719-4521041	q1	q2	OK	33.0313	31.8105	-0.0543289	0.134054	0.89336	0.999993	no
C07A4.1	WBGene00007396	chrX:10167993-10171823	q1	q2	OK	1.73636	2.37909	0.454345	-0.706379	0.479952	0.999993	no
C07A4.2	WBGene00007397	chrX:10172266-10174098	q1	q2	OK	0.664843	0.666518	0.00363084	-0.00513283	0.995905	0.999993	no
C07A4.3	WBGene00007398	chrX:10174465-10175787	q1	q2	NOTEST	0.015326	0.0331906	1.1148	-0.435149	0.663454	1	no
C07A9.10	WBGene00007406	chrIII:9685085-9686642	q1	q2	NOTEST	0.0918334	0.201331	1.13248	-0.839577	0.401145	1	no
C07A9.12	WBGene00043994	chrIII:9725200-9727455	q1	q2	OK	5.64654	6.16981	0.127859	-0.21746	0.82785	0.999993	no
C07A9.13	WBGene00044227	chrIII:9679613-9681185	q1	q2	OK	1.93635	2.19501	0.180884	-0.259028	0.795613	0.999993	no
C07A9.2	WBGene00007400	chrIII:9694720-9696433	q1	q2	OK	65.1008	58.4358	-0.155822	0.433829	0.664413	0.999993	no
C07A9.5	WBGene00007401	chrIII:9681439-9682745	q1	q2	OK	1.0276	1.35216	0.395984	-0.558533	0.57648	0.999993	no
C07A9.8	WBGene00007404	chrIII:9686905-9690169	q1	q2	NOTEST	0.226447	0.260223	0.200576	-0.229641	0.818371	1	no
C07A9.9	WBGene00007405	chrIII:9663209-9667445	q1	q2	OK	6.91786	6.13855	-0.172429	0.308066	0.758032	0.999993	no
C07B5.2	WBGene00007407	chrX:9516449-9517033	q1	q2	OK	1.05848	0.904891	-0.226183	0.21416	0.830422	0.999993	no
C07B5.3	WBGene00007408	chrX:9522587-9523116	q1	q2	OK	0.310486	0.538906	0.795504	-0.450108	0.652633	0.999993	no
C07B5.4	WBGene00007409	chrX:9529475-9536561	q1	q2	OK	7.17267	7.15	-0.00456807	0.00821163	0.993448	0.999993	no
C07B5.6	WBGene00007410	chrX:9518964-9521429	q1	q2	OK	4.17772	4.10538	-0.0252015	0.0390081	0.968884	0.999993	no
C07C7.1	WBGene00007411	chrIV:9185048-9186008	q1	q2	OK	0.556832	0.67717	0.282278	-0.332519	0.739497	0.999993	no
C07D10.1	WBGene00015566	chrII:7398969-7400497	q1	q2	OK	11.7593	16.457	0.484897	-0.998873	0.317856	0.999993	no
C07D10.5	WBGene00015569	chrII:7381517-7383433	q1	q2	OK	276.832	298.381	0.108146	-0.421143	0.67365	0.999993	no
C07D10.6	WBGene00044673	chrII:7379133-7379569	q1	q2	OK	3.22611	2.30181	-0.487027	0.620305	0.535057	0.999993	no
C07D8.5	WBGene00015564	chrX:7344000-7344505	q1	q2	NOTEST	0.0362829	0.096453	1.41053	-0.426477	0.669761	1	no
C07D8.6	WBGene00015565	chrX:7341462-7342730	q1	q2	OK	100.806	86.4264	-0.222035	0.728042	0.466588	0.999993	no
C07E3.10	WBGene00007420	chrII:10346336-10349947	q1	q2	OK	17.9845	19.2157	0.095533	-0.0586133	0.95326	0.999993	no
C07E3.3	WBGene00007414	chrII:10353679-10357458	q1	q2	OK	2.68548	2.40499	-0.159146	0.25508	0.798662	0.999993	no
C07E3.4	WBGene00007415	chrII:10360810-10362855	q1	q2	NOTEST	0.112918	0.130589	0.209756	-0.22166	0.824578	1	no
C07E3.5	WBGene00007416	chrII:10363527-10365649	q1	q2	OK	1.2387	1.30277	0.0727595	-0.106505	0.915181	0.999993	no
C07E3.6	WBGene00007417	chrII:10367851-10369537	q1	q2	OK	31.4647	25.0423	-0.32937	0.813309	0.416041	0.999993	no
C07E3.8	WBGene00007418	chrII:10352202-10353431	q1	q2	OK	2.36601	2.60117	0.136703	-0.209017	0.834435	0.999993	no
C07E3.9	WBGene00007419	chrII:10350701-10351423	q1	q2	OK	30.999	38.3184	0.305814	-0.602222	0.547026	0.999993	no
C07F11.2	WBGene00015570	chrI:420924-423657	q1	q2	OK	0.95641	1.12831	0.238456	-0.341359	0.732833	0.999993	no
C07G1.2	C07G1.2	chrIV:8206599-8210823	q1	q2	OK	0.887221	1.09796	0.307463	-0.470129	0.638263	0.999993	no
C07G1.6	WBGene00015572	chrIV:8206599-8210823	q1	q2	NOTEST	0.0782608	0.0470721	-0.733419	0.0798508	0.936356	1	no
C07G1.7	WBGene00015573	chrIV:8210939-8211814	q1	q2	OK	0.298704	0.650426	1.12267	-1.21792	0.223255	0.999993	no
C07G3.10	WBGene00015578	chrV:3502303-3503074	q1	q2	OK	0.832381	0.53078	-0.64913	0.804822	0.420922	0.999993	no
C07G3.2	WBGene00015574	chrV:3523583-3524572	q1	q2	OK	0.656775	0.900643	0.455557	-0.574961	0.565317	0.999993	no
C07G3.8	WBGene00015576	chrV:3493633-3501760	q1	q2	NOTEST	0.275444	0.241484	-0.189832	0.241438	0.809216	1	no
C07H4.1	WBGene00007421	chrII:9091142-9092070	q1	q2	OK	5.51785	6.69105	0.278127	-0.391511	0.69542	0.999993	no
C07H6.2	WBGene00015579	chrIII:7520937-7521372	q1	q2	OK	81.3207	65.3929	-0.314489	0.733825	0.463055	0.999993	no
C07H6.3	WBGene00015580	chrIII:7508129-7518458	q1	q2	OK	7.69505	9.01978	0.229161	-0.481718	0.630006	0.999993	no
C07H6.4	WBGene00015581	chrIII:7499642-7503173	q1	q2	OK	52.933	52.9973	0.00175054	-0.00626463	0.995002	0.999993	no
C07H6.9	WBGene00015582	chrIII:7498752-7499299	q1	q2	OK	10.9596	10.9309	-0.00377899	0.00612896	0.99511	0.999993	no
C08A9.10	WBGene00044773	chrX:17081053-17081968	q1	q2	OK	0.287113	0.246362	-0.220837	0.177437	0.859165	0.999993	no
C08A9.3	WBGene00015583	chrX:17087807-17091638	q1	q2	NOTEST	0.0311846	0.0404073	0.373779	-0.278435	0.780678	1	no
C08A9.6	WBGene00015586	chrX:17094229-17096463	q1	q2	OK	13.6723	14.1546	0.0500175	-0.111126	0.911516	0.999993	no
C08A9.8	WBGene00015588	chrX:17102770-17104797	q1	q2	OK	1.54861	1.76913	0.192064	-0.28641	0.774564	0.999993	no
C08A9.9	WBGene00015589	chrX:17106531-17107696	q1	q2	NOTEST	0.112237	0.132859	0.243352	-0.211005	0.832883	1	no
C08B11.3	WBGene00007433	chrII:8022582-8027705	q1	q2	OK	172.157	166.805	-0.0455639	0.185712	0.85267	0.999993	no
C08B11.8	WBGene00007435	chrII:8039957-8041665	q1	q2	OK	17.2755	13.5509	-0.350331	0.826003	0.408802	0.999993	no
C08B11.9	WBGene00007436	chrII:8034283-8038115	q1	q2	OK	82.1152	79.4116	-0.0483008	0.184259	0.85381	0.999993	no
C08B6.10	WBGene00007430	chrV:10125026-10130270	q1	q2	OK	1.62542	1.85593	0.191333	-0.0653403	0.947903	0.999993	no
C08B6.11	WBGene00007431	chrV:10107906-10112262	q1	q2	OK	1.88385	2.6581	0.496712	-0.615548	0.538193	0.999993	no
C08B6.14	WBGene00044044	chrV:10100130-10101991	q1	q2	NOTEST	0	0	0	0	1	1	no
C08B6.2	WBGene00007423	chrV:10105686-10107488	q1	q2	NOTEST	0.160996	0.176316	0.13114	-0.138464	0.889874	1	no
C08B6.3	WBGene00007424	chrV:10107906-10112262	q1	q2	OK	1.51024	2.2141	0.551938	-0.619603	0.535519	0.999993	no
C08B6.5	WBGene00007426	chrV:10117739-10120961	q1	q2	NOTEST	0.145943	0.137457	-0.0864283	0.0842739	0.932839	1	no
C08B6.6	WBGene00007427	chrV:10123612-10124664	q1	q2	NOTEST	0.0362307	0.11302	1.6413	-0.74632	0.455474	1	no
C08B6.7	WBGene00007428	chrV:10130379-10134123	q1	q2	OK	57.7467	54.3963	-0.0862284	0.306904	0.758917	0.999993	no
C08B6.8	WBGene00007429	chrV:10134635-10142864	q1	q2	OK	135.694	130.388	-0.0575478	0.171322	0.86397	0.999993	no
C08C3.4	WBGene00015591	chrIII:7793377-7795344	q1	q2	OK	14.8037	10.1974	-0.537755	0.931501	0.351595	0.999993	no
C08D8.1	WBGene00015592	chrV:8345760-8349889	q1	q2	NOTEST	0.231181	0.286629	0.310161	-0.341709	0.73257	1	no
C08E3.1	WBGene00015593	chrII:1633811-1634095	q1	q2	NOTEST	0	0.237293	1.79769e+308	1.79769e+308	0.264219	1	no
C08E3.13	WBGene00015605	chrII:1632000-1632322	q1	q2	OK	0.372654	0.151541	-1.29813	0.483458	0.628771	0.999993	no
C08E3.14	WBGene00044415	chrII:1625972-1626890	q1	q2	NOTEST	0.00727509	0	-1.79769e+308	-1.79769e+308	0.350037	1	no
C08E3.15	WBGene00044416	chrII:1627485-1627890	q1	q2	NOTEST	0.136598	0	-1.79769e+308	-1.79769e+308	0.350037	1	no
C08E8.1	WBGene00007437	chrV:18361022-18362515	q1	q2	NOTEST	0.0988425	0.0848191	-0.220742	0.0765461	0.938985	1	no
C08E8.10	WBGene00077692	chrV:18339111-18339860	q1	q2	OK	0.465901	1.29221	1.47175	-1.02377	0.305943	0.999993	no
C08E8.11	WBGene00119201	chrV:18351005-18352644	q1	q2	NOTEST	0	0	0	0	1	1	no
C08E8.2	WBGene00007438	chrV:18353481-18355814	q1	q2	NOTEST	0.00504696	0	-1.79769e+308	-1.79769e+308	0.350037	1	no
C08E8.3	WBGene00007439	chrV:18350119-18350416	q1	q2	OK	0.293821	0.943089	1.68246	-0.724344	0.468855	0.999993	no
C08E8.4	WBGene00007440	chrV:18371817-18373448	q1	q2	OK	0.461277	0.617149	0.419987	-0.5151	0.606483	0.999993	no
C08E8.5	WBGene00007441	chrV:18359789-18359960	q1	q2	NOTEST	0	0	0	0	1	1	no
C08E8.6	WBGene00007442	chrV:18367985-18368394	q1	q2	NOTEST	0.13145	0.12073	-0.122728	0.0361068	0.971197	1	no
C08E8.9	WBGene00050891	chrV:18364829-18365196	q1	q2	OK	0.288216	0.389287	0.433685	-0.164332	0.86947	0.999993	no
C08F1.10	WBGene00015613	chrII:1785275-1786283	q1	q2	OK	232.874	265.594	0.189668	-0.694546	0.48734	0.999993	no
C08F1.11	WBGene00044417	chrII:1783460-1784448	q1	q2	OK	31.8876	35.5822	0.158159	-0.387237	0.698581	0.999993	no
C08F1.6	WBGene00015610	chrII:1787227-1788193	q1	q2	OK	218.274	245.055	0.166965	-0.601687	0.547383	0.999993	no
C08F1.8	WBGene00015611	chrII:1804162-1808300	q1	q2	OK	3.18586	3.39194	0.0904278	-0.163284	0.870295	0.999993	no
C08F11.1	WBGene00007450	chrIV:13623810-13625518	q1	q2	NOTEST	0.099227	0.222428	1.16453	-0.897226	0.369598	1	no
C08F11.10	WBGene00007457	chrIV:13648044-13649186	q1	q2	NOTEST	0.0887568	0.0160202	-2.46997	0.846386	0.397338	1	no
C08F11.11	WBGene00007458	chrIV:13646710-13647431	q1	q2	NOTEST	0	0	0	0	1	1	no
C08F11.12	WBGene00007459	chrIV:13650988-13651487	q1	q2	NOTEST	0.0364636	0	-1.79769e+308	-1.79769e+308	0.303748	1	no
C08F11.13	WBGene00007460	chrIV:13607415-13609859	q1	q2	OK	5.52097	5.50857	-0.00324361	0.00597233	0.995235	0.999993	no
C08F11.17	WBGene00045069	chrIV:13649811-13650314	q1	q2	NOTEST	0	0	0	0	1	1	no
C08F11.2	WBGene00007451	chrIV:13621937-13623110	q1	q2	NOTEST	0	0.012532	1.79769e+308	1.79769e+308	0.296723	1	no
C08F11.3	WBGene00007452	chrIV:13620259-13621489	q1	q2	NOTEST	0.00828917	0.0188358	1.18417	-0.256407	0.797636	1	no
C08F11.7	WBGene00007454	chrIV:13637263-13638501	q1	q2	OK	0.237383	0.681766	1.52206	-1.56818	0.11684	0.999993	no
C08F8.2	WBGene00007444	chrIV:11147298-11154313	q1	q2	OK	25.9623	23.5663	-0.139697	0.190695	0.848765	0.999993	no
C08F8.3	WBGene00007445	chrIV:11155007-11156613	q1	q2	OK	58.7915	53.7961	-0.128106	0.397258	0.691177	0.999993	no
C08F8.4	WBGene00007446	chrIV:11157127-11159440	q1	q2	OK	0.932092	1.14159	0.292496	-0.438291	0.661175	0.999993	no
C08F8.6	WBGene00007448	chrIV:11162764-11164267	q1	q2	OK	1.08225	1.32262	0.289365	-0.427705	0.668866	0.999993	no
C08F8.9	WBGene00007449	chrIV:11177264-11178574	q1	q2	OK	192.902	209.166	0.116779	-0.239769	0.810509	0.999993	no
C08G5.1	WBGene00015614	chrII:734656-738673	q1	q2	NOTEST	0.0051411	0.0139484	1.43995	-0.605011	0.545172	1	no
C08G5.3	WBGene00015616	chrII:743105-745135	q1	q2	NOTEST	0.225868	0.231308	0.0343351	-0.0394363	0.968543	1	no
C08G5.5	C08G5.5	chrII:756307-756898	q1	q2	OK	4.77859	4.0095	-0.253165	0.320963	0.748239	0.999993	no
C08G5.6	WBGene00015618	chrII:770559-772124	q1	q2	OK	0.342473	0.473858	0.468465	-0.489942	0.624175	0.999993	no
C08G5.7	WBGene00044418	chrII:761588-765324	q1	q2	OK	2.75598	1.77371	-0.635796	0.592944	0.553219	0.999993	no
C08G9.1	WBGene00015619	chrIV:7658722-7664151	q1	q2	OK	8.36991	8.67863	0.0522545	-0.0956999	0.923759	0.999993	no
C08G9.2	WBGene00015620	chrIV:7664165-7672868	q1	q2	OK	4.29756	4.73735	0.140564	-0.357479	0.720733	0.999993	no
C08H9.1	WBGene00007462	chrII:9875119-9877815	q1	q2	NOTEST	0.241945	0.221797	-0.125442	0.132761	0.894382	1	no
C08H9.15	WBGene00007474	chrII:9881133-9882292	q1	q2	OK	11.2338	10.0669	-0.158228	0.244047	0.807194	0.999993	no
C08H9.16	WBGene00086566	chrII:9892729-9894279	q1	q2	OK	51.7394	50.2151	-0.043143	0.119052	0.905234	0.999993	no
C08H9.2	WBGene00007463	chrII:9886486-9891022	q1	q2	OK	207.271	186.125	-0.155242	0.51992	0.603119	0.999993	no
C09B7.2	WBGene00015621	chrX:2668189-2670582	q1	q2	OK	16.1189	14.8506	-0.118234	0.219345	0.826381	0.999993	no
C09B8.3	WBGene00015622	chrX:6007167-6011275	q1	q2	OK	1.95089	2.20788	0.178531	-0.267062	0.789422	0.999993	no
C09B8.4	WBGene00015623	chrX:6018445-6019901	q1	q2	OK	10.2205	12.9577	0.342342	-0.651147	0.514951	0.999993	no
C09B8.5	WBGene00015624	chrX:6020830-6022458	q1	q2	OK	38.986	48.2082	0.306323	-0.841098	0.400293	0.999993	no
C09B8.8	WBGene00015625	chrX:6015456-6017549	q1	q2	OK	0.722559	0.864187	0.258228	-0.265757	0.790427	0.999993	no
C09B9.1	WBGene00015626	chrIV:5037806-5040430	q1	q2	NOTEST	0.0348285	0.0471414	0.436727	-0.230679	0.817565	1	no
C09B9.2	WBGene00015627	chrIV:5029291-5030998	q1	q2	NOTEST	0	0.0238155	1.79769e+308	1.79769e+308	0.225131	1	no
C09B9.3	WBGene00015628	chrIV:5021179-5028956	q1	q2	NOTEST	0.0583371	0.0702795	0.268691	-0.276498	0.782166	1	no
C09B9.4	WBGene00015629	chrIV:5031612-5033360	q1	q2	NOTEST	0	0.0142226	1.79769e+308	1.79769e+308	0.264219	1	no
C09B9.7	WBGene00015630	chrIV:5056964-5059843	q1	q2	NOTEST	0.0289224	0.0173914	-0.733817	0.476759	0.633534	1	no
C09B9.8	WBGene00044484	chrIV:5040935-5045388	q1	q2	OK	4.48119	5.41961	0.274308	-0.405766	0.684914	0.999993	no
C09D4.1	WBGene00015632	chrI:5497780-5507026	q1	q2	OK	4.49951	5.28987	0.233465	-0.259638	0.795143	0.999993	no
C09D4.2	WBGene00015633	chrI:5491476-5493188	q1	q2	OK	15.4892	16.1613	0.0612739	-0.122349	0.902623	0.999993	no
C09D4.3	WBGene00015634	chrI:5488342-5490629	q1	q2	OK	0.38807	0.550611	0.504717	-0.692	0.488937	0.999993	no
C09D4.4	WBGene00015635	chrI:5479553-5484646	q1	q2	OK	33.8764	30.3633	-0.157952	0.465329	0.641696	0.999993	no
C09D4.6	WBGene00015636	chrI:5486489-5487153	q1	q2	OK	2.31369	2.21579	-0.0623774	0.0907611	0.927682	0.999993	no
C09E7.10	WBGene00044295	chrIII:6518660-6519996	q1	q2	NOTEST	0.0633814	0.180829	1.5125	-1.05828	0.289927	1	no
C09E7.4	WBGene00015638	chrIII:6534413-6536942	q1	q2	OK	85.0147	97.5888	0.199004	-0.721426	0.470647	0.999993	no
C09E7.5	WBGene00015639	chrIII:6538065-6541259	q1	q2	OK	1.20755	1.38535	0.198169	-0.29677	0.766642	0.999993	no
C09E7.6	WBGene00015640	chrIII:6545286-6546351	q1	q2	OK	6.67807	7.06284	0.0808169	-0.128245	0.897955	0.999993	no
C09E7.7	WBGene00015641	chrIII:6546670-6551176	q1	q2	OK	29.3304	37.0371	0.336571	-1.11792	0.2636	0.999993	no
C09E7.8	WBGene00015642	chrIII:6553521-6558522	q1	q2	OK	7.92315	7.08069	-0.162183	0.351611	0.72513	0.999993	no
C09E7.9	C09E7.9	chrIII:6541554-6545120	q1	q2	OK	6.33004	6.6096	0.0623491	-0.140445	0.888309	0.999993	no
C09E8.1	WBGene00015644	chrII:556483-564123	q1	q2	OK	8.14415	6.7453	-0.271881	0.60709	0.543791	0.999993	no
C09E9.1	WBGene00007476	chrIV:1275864-1277060	q1	q2	OK	36.4411	34.1296	-0.0945435	0.209205	0.834288	0.999993	no
C09F12.2	WBGene00007482	chrX:11053877-11056904	q1	q2	NOTEST	0.142231	0.161047	0.179239	-0.21554	0.829347	1	no
C09F12.3	WBGene00007483	chrX:11040966-11042791	q1	q2	NOTEST	0.191083	0.151503	-0.334846	0.331936	0.739937	1	no
C09F5.1	WBGene00015647	chrIII:658705-662724	q1	q2	OK	35.7777	37.7401	0.0770361	-0.235982	0.813446	0.999993	no
C09F5.3	WBGene00015649	chrIII:662843-666261	q1	q2	NOTEST	0.194654	0.304951	0.647665	-0.683492	0.494296	1	no
C09F9.1	WBGene00007478	chrII:14698750-14699236	q1	q2	OK	1.98802	2.32408	0.22533	-0.298415	0.765387	0.999993	no
C09F9.2	WBGene00007479	chrII:14705440-14712525	q1	q2	OK	76.8247	75.9874	-0.0158111	0.0629979	0.949768	0.999993	no
C09F9.3	WBGene00007480	chrII:14721273-14727974	q1	q2	OK	0.612518	0.707259	0.207487	-0.272555	0.785196	0.999993	no
C09G1.2	WBGene00007484	chrX:15978126-15982529	q1	q2	NOTEST	0.0318381	0.0364213	0.194031	-0.171172	0.864088	1	no
C09G1.3	WBGene00007485	chrX:15986091-15987523	q1	q2	OK	0.601896	0.706059	0.230276	-0.272527	0.785217	0.999993	no
C09G1.4	WBGene00007486	chrX:15988161-15996865	q1	q2	OK	1.5609	1.19146	-0.389639	0.611996	0.540541	0.999993	no
C09G1.5	WBGene00007487	chrX:15959028-15962250	q1	q2	OK	1.5154	1.01401	-0.579635	0.798483	0.424591	0.999993	no
C09G12.1	WBGene00015651	chrIV:3502135-3503909	q1	q2	OK	8.4789	8.44592	-0.00562317	0.0097438	0.992226	0.999993	no
C09G12.17	WBGene00044470	chrIV:3495292-3496437	q1	q2	OK	1.27953	0.734332	-0.80111	0.827246	0.408098	0.999993	no
C09G12.5	WBGene00015655	chrIV:3479331-3479727	q1	q2	NOTEST	0	0	0	0	1	1	no
C09G4.2	WBGene00015650	chrIV:8520880-8538166	q1	q2	OK	11.3474	8.25734	-0.458607	0.765023	0.444258	0.999993	no
C09G4.4	WBGene00044001	chrIV:8511270-8513903	q1	q2	LOWDATA	115.377	95.4993	-0.272791	0	1	1	no
C09G5.2	WBGene00007488	chrII:10702519-10714236	q1	q2	OK	22.084	23.4398	0.0859624	-0.215685	0.829233	0.999993	no
C09G5.7	WBGene00007489	chrII:10714853-10716278	q1	q2	OK	0.646227	9.87101	3.93308	-5.9575	2.56128e-09	6.92342e-06	yes
C09G5.8	WBGene00007490	chrII:10718332-10729193	q1	q2	OK	3.68454	4.12646	0.16342	-0.370817	0.710774	0.999993	no
C09G9.1	WBGene00007492	chrIV:8862597-8865472	q1	q2	OK	19.7016	15.8362	-0.31509	0.799693	0.423889	0.999993	no
C09G9.2	WBGene00007493	chrIV:8868059-8869656	q1	q2	OK	90.5258	94.7803	0.0662592	-0.200459	0.841121	0.999993	no
C09G9.3	WBGene00007494	chrIV:8869948-8873044	q1	q2	OK	0.813381	0.917355	0.173549	-0.147779	0.882517	0.999993	no
C09G9.5	WBGene00007495	chrIV:8886514-8888589	q1	q2	OK	1.70445	2.25635	0.40469	-0.552885	0.580342	0.999993	no
C09G9.7	WBGene00007496	chrIV:8877597-8879880	q1	q2	OK	0.220365	0.334068	0.600247	-0.561574	0.574406	0.999993	no
C09G9.8	WBGene00007497	chrIV:8881470-8881950	q1	q2	NOTEST	0	0	0	0	1	1	no
C09H10.10	WBGene00007504	chrII:11095873-11096417	q1	q2	OK	18.7872	16.2987	-0.204994	0.361317	0.717863	0.999993	no
C09H10.5	WBGene00007499	chrII:11100913-11101923	q1	q2	OK	14.2914	12.8389	-0.154625	0.288779	0.77275	0.999993	no
C09H10.7	WBGene00007501	chrII:11108165-11109525	q1	q2	OK	89.3954	92.8587	0.0548367	-0.172366	0.86315	0.999993	no
C09H10.9	WBGene00007503	chrII:11104403-11105988	q1	q2	OK	1.03335	1.20845	0.225835	-0.333209	0.738977	0.999993	no
C09H5.1	WBGene00015659	chrV:7731614-8316095	q1	q2	NOTEST	0	0	0	0	1	1	no
C10A4.1	WBGene00015662	chrX:7415793-7418582	q1	q2	OK	0.725429	0.460329	-0.656169	0.945289	0.344511	0.999993	no
C10A4.10	WBGene00050957	chrX:7398951-7400812	q1	q2	OK	0.992427	1.05916	0.0938858	-0.125952	0.89977	0.999993	no
C10A4.2	WBGene00015663	chrX:7412449-7412704	q1	q2	NOTEST	0.131283	0.232532	0.824747	-0.235638	0.813714	1	no
C10A4.3	WBGene00015664	chrX:7407409-7408657	q1	q2	OK	13.7265	16.0579	0.226322	-0.423004	0.672292	0.999993	no
C10A4.4	WBGene00015665	chrX:7402128-7403390	q1	q2	NOTEST	0	0	0	0	1	1	no
C10A4.5	WBGene00015666	chrX:7393870-7395941	q1	q2	OK	0.751879	0.585613	-0.360554	0.504714	0.61376	0.999993	no
C10A4.6	WBGene00015667	chrX:7390553-7392230	q1	q2	NOTEST	0.0189238	0.0468337	1.30734	-0.535923	0.592012	1	no
C10A4.7	WBGene00015668	chrX:7413565-7415475	q1	q2	NOTEST	0.157059	0.089489	-0.811522	0.516587	0.605445	1	no
C10A4.9	WBGene00045456	chrX:7420854-7421892	q1	q2	NOTEST	0.024496	0.0312494	0.351278	-0.0955446	0.923882	1	no
C10B5.1	WBGene00015670	chrV:8581496-8583507	q1	q2	OK	7.74315	7.52599	-0.0410403	0.0745045	0.940609	0.999993	no
C10B5.3	WBGene00015671	chrV:8583827-8584504	q1	q2	OK	8.12485	10.5098	0.371317	-0.582885	0.55997	0.999993	no
C10C5.1	WBGene00007505	chrIV:9359423-9366437	q1	q2	OK	49.0233	51.6897	0.076409	-0.260156	0.794744	0.999993	no
C10C5.2	WBGene00007506	chrIV:9371490-9373639	q1	q2	OK	0.489548	0.602391	0.29925	-0.388319	0.69778	0.999993	no
C10C5.7	WBGene00007511	chrIV:9385108-9385582	q1	q2	OK	0.930468	1.85754	0.997361	-0.754077	0.450803	0.999993	no
C10C6.3	WBGene00007512	chrIV:11463586-11465167	q1	q2	NOTEST	0.0506589	0.0261806	-0.952315	0.428336	0.668407	1	no
C10C6.6	WBGene00007514	chrIV:11470162-11479229	q1	q2	OK	141.196	152.102	0.107345	-0.400027	0.689137	0.999993	no
C10C6.7	WBGene00007515	chrIV:11465406-11467331	q1	q2	OK	4.06933	4.07636	0.00249038	-0.00319718	0.997449	0.999993	no
C10E2.1	WBGene00015672	chrX:16763635-16766583	q1	q2	OK	0.323799	0.275485	-0.233128	0.254762	0.798907	0.999993	no
C10E2.2	WBGene00015673	chrX:16745679-16748135	q1	q2	OK	1.53026	1.7937	0.229156	-0.360674	0.718343	0.999993	no
C10E2.4	WBGene00015674	chrX:16749681-16751037	q1	q2	OK	1.31651	2.07632	0.657305	-0.835404	0.40349	0.999993	no
C10E2.5	WBGene00015675	chrX:16751790-16753600	q1	q2	OK	0.889746	1.948	1.13053	-1.36414	0.172525	0.999993	no
C10E2.6	WBGene00015676	chrX:16767106-16770427	q1	q2	OK	42.9135	35.6978	-0.265598	0.882856	0.377314	0.999993	no
C10F3.4	WBGene00015678	chrV:5960567-5969137	q1	q2	OK	17.1911	17.0291	-0.0136519	0.0224328	0.982103	0.999993	no
C10F3.7	WBGene00015679	chrV:5983727-5986837	q1	q2	OK	24.4473	34.9361	0.515044	-0.90255	0.366765	0.999993	no
C10G11.1	WBGene00015685	chrI:6307428-6308431	q1	q2	NOTEST	0.1646	0.308137	0.904609	-0.924934	0.355	1	no
C10G11.10	WBGene00015690	chrI:6305033-6306357	q1	q2	OK	0.377405	0.438649	0.216953	-0.224063	0.822708	0.999993	no
C10G11.6	WBGene00015686	chrI:6290007-6293857	q1	q2	OK	11.6135	8.90978	-0.382336	0.794027	0.42718	0.999993	no
C10G11.7	WBGene00015687	chrI:6284974-6289340	q1	q2	OK	953.99	1072.44	0.168856	-0.691759	0.489088	0.999993	no
C10G11.9	WBGene00015689	chrI:6274576-6275270	q1	q2	NOTEST	0	0.0762414	1.79769e+308	1.79769e+308	0.154216	1	no
C10G6.1	WBGene00015680	chrIV:5820358-5830189	q1	q2	OK	50.1869	57.9342	0.207105	-0.699096	0.484492	0.999993	no
C10G8.2	WBGene00015681	chrV:5314387-5319561	q1	q2	OK	0.312568	0.24087	-0.375915	0.0742301	0.940827	0.999993	no
C10G8.3	WBGene00015682	chrV:5312873-5314273	q1	q2	OK	0.13329	0.391945	1.55608	-1.20294	0.228999	0.999993	no
C10G8.4	WBGene00015683	chrV:5311918-5312300	q1	q2	OK	0.111857	0.383741	1.77848	-0.772169	0.440015	0.999993	no
C10G8.8	WBGene00015684	chrV:5324781-5328454	q1	q2	OK	11.6105	11.8849	0.0337034	-0.0567438	0.954749	0.999993	no
C10H11.7	WBGene00015696	chrI:4719789-4721099	q1	q2	NOTEST	0.179409	0.161649	-0.150391	0.14664	0.883416	1	no
C10H11.8	WBGene00015697	chrI:4735756-4737785	q1	q2	OK	43.4267	45.5007	0.0673066	-0.188195	0.850724	0.999993	no
C11D2.1	C11D2.1	chrIV:6191274-6191538	q1	q2	NOTEST	0.107167	0	-1.79769e+308	-1.79769e+308	0.350037	1	no
C11D2.3	WBGene00015701	chrIV:6154094-6155390	q1	q2	OK	3.14185	3.66396	0.221791	-0.0724313	0.942259	0.999993	no
C11D2.4	WBGene00015702	chrIV:6155481-6156885	q1	q2	OK	60.2294	64.4639	0.0980235	-0.301017	0.763402	0.999993	no
C11D2.7	WBGene00015703	chrIV:6154094-6155390	q1	q2	OK	76.8385	69.5479	-0.143824	0.394836	0.692964	0.999993	no
C11D9.1	WBGene00015704	chrI:4422032-4426138	q1	q2	OK	5.98543	6.86179	0.197131	-0.394627	0.693118	0.999993	no
C11E4.1	WBGene00007516	chrX:9584637-9586080	q1	q2	OK	13.0146	14.1032	0.115894	-0.21509	0.829697	0.999993	no
C11E4.2	WBGene00007517	chrX:9587884-9588822	q1	q2	OK	2.79014	3.70053	0.407397	-0.613846	0.539317	0.999993	no
C11E4.4	C11E4.4	chrX:9593786-9595841	q1	q2	OK	0.324702	0.247076	-0.394162	0.408891	0.682619	0.999993	no
C11E4.6	WBGene00007520	chrX:9610505-9616967	q1	q2	OK	8.18676	8.003	-0.0327514	0.0842934	0.932823	0.999993	no
C11E4.7	WBGene00007521	chrX:9617189-9618751	q1	q2	NOTEST	0.0348149	0.103925	1.57777	-0.940484	0.346969	1	no
C11E4.8	WBGene00007522	chrX:9623246-9624657	q1	q2	NOTEST	0.189575	0.168577	-0.169361	0.128179	0.898007	1	no
C11G10.1	WBGene00007525	chrX:15157290-15158547	q1	q2	OK	0.440416	0.320353	-0.459207	0.489756	0.624307	0.999993	no
C11G10.2	WBGene00007526	chrX:15121163-15147670	q1	q2	OK	1.4678	1.29082	-0.185372	0.0703464	0.943918	0.999993	no
C11G6.2	WBGene00007523	chrX:16329144-16329925	q1	q2	OK	4.30107	10.139	1.23715	-1.89177	0.058522	0.999993	no
C11H1.2	WBGene00007528	chrX:14304877-14307697	q1	q2	OK	28.6036	30.2048	0.0785816	-0.217173	0.828073	0.999993	no
C11H1.3	WBGene00007529	chrX:14308182-14311613	q1	q2	OK	74.496	79.3857	0.0917162	-0.313154	0.754163	0.999993	no
C11H1.5	WBGene00007530	chrX:14298031-14303070	q1	q2	OK	0.71318	1.08154	0.600755	-0.90465	0.365651	0.999993	no
C11H1.7	WBGene00007531	chrX:14327701-14330125	q1	q2	OK	26.2276	35.2851	0.427971	-0.912397	0.36156	0.999993	no
C11H1.8	WBGene00007532	chrX:14295751-14296586	q1	q2	OK	52.1134	50.8074	-0.0366169	0.0869056	0.930747	0.999993	no
C11H1.9	WBGene00023500	chrX:14313650-14326658	q1	q2	OK	20.4846	17.8095	-0.201889	0.378621	0.704969	0.999993	no
C12C8.2	WBGene00007533	chrI:9327848-9330888	q1	q2	OK	8.28361	10.2597	0.30866	-0.563796	0.572893	0.999993	no
C12D12.1	WBGene00015713	chrX:3499239-3505224	q1	q2	OK	0.487176	0.578321	0.247429	-0.299232	0.764763	0.999993	no
C12D12.3	WBGene00015714	chrX:3489288-3491142	q1	q2	OK	3.39875	4.33384	0.350642	-0.512605	0.608227	0.999993	no
C12D12.4	WBGene00015715	chrX:3486295-3486825	q1	q2	OK	0.420154	0.390812	-0.104444	0.0701125	0.944104	0.999993	no
C12D12.5	WBGene00015716	chrX:3505552-3506352	q1	q2	OK	2.02973	2.03538	0.00400829	-0.00551806	0.995597	0.999993	no
C12D5.10	WBGene00015711	chrV:7692071-7693469	q1	q2	OK	0.394	0.762194	0.951961	-1.22917	0.219008	0.999993	no
C12D5.3	WBGene00015706	chrV:7676184-7676944	q1	q2	NOTEST	0.073178	0.0210214	-1.79955	0.63254	0.527034	1	no
C12D5.4	WBGene00015707	chrV:7672069-7673027	q1	q2	NOTEST	0.0116897	0.0409227	1.80766	-0.411861	0.680441	1	no
C12D5.5	WBGene00015708	chrV:7668220-7668966	q1	q2	NOTEST	0	0	0	0	1	1	no
C12D5.9	WBGene00015710	chrV:7688336-7689957	q1	q2	OK	1.86384	1.94197	0.0592397	-0.0894333	0.928738	0.999993	no
C12D8.1	WBGene00007534	chrV:10236135-10238836	q1	q2	OK	156.328	158.439	0.0193575	-0.0712877	0.943169	0.999993	no
C12D8.13	WBGene00007540	chrV:10219428-10220444	q1	q2	NOTEST	0.00772721	0.0175588	1.18417	-0.256407	0.797636	1	no
C12D8.15	WBGene00007542	chrV:10228690-10229215	q1	q2	OK	0.56323	0.589654	0.066145	-0.0571998	0.954386	0.999993	no
C12D8.9	WBGene00007538	chrV:10242829-10243153	q1	q2	NOTEST	0	0	0	0	1	1	no
C13A10.1	WBGene00015728	chrII:1350726-1355645	q1	q2	OK	0.288204	0.396295	0.459484	-0.602359	0.546936	0.999993	no
C13A10.2	WBGene00015729	chrII:1357186-1358012	q1	q2	OK	1.75838	1.21726	-0.530608	0.682418	0.494975	0.999993	no
C13A2.1	WBGene00015718	chrV:7289436-7291813	q1	q2	NOTEST	0.0292553	0	-1.79769e+308	-1.79769e+308	0.129916	1	no
C13A2.10	WBGene00015726	chrV:7273812-7274888	q1	q2	NOTEST	0.0268198	0.0718132	1.42095	-0.674426	0.50004	1	no
C13A2.11	WBGene00015727	chrV:7280856-7281954	q1	q2	NOTEST	0.0176208	0	-1.79769e+308	-1.79769e+308	0.303748	1	no
C13A2.12	WBGene00044547	chrV:7258789-7260139	q1	q2	NOTEST	0.22434	0.155436	-0.529368	0.541136	0.588414	1	no
C13A2.2	WBGene00015719	chrV:7286166-7287381	q1	q2	NOTEST	0	0	0	0	1	1	no
C13A2.3	WBGene00015720	chrV:7282397-7284649	q1	q2	OK	0.276745	0.432361	0.643682	-0.722225	0.470156	0.999993	no
C13A2.4	WBGene00015721	chrV:7279371-7280512	q1	q2	NOTEST	0	0	0	0	1	1	no
C13A2.5	WBGene00015722	chrV:7275772-7278454	q1	q2	NOTEST	0.0454916	0.0730246	0.682784	-0.521785	0.60182	1	no
C13A2.6	WBGene00015723	chrV:7269725-7272769	q1	q2	NOTEST	0.00798767	0	-1.79769e+308	-1.79769e+308	0.260419	1	no
C13A2.7	WBGene00015724	chrV:7266352-7266957	q1	q2	NOTEST	0	0	0	0	1	1	no
C13A2.9	WBGene00015725	chrV:7262546-7264028	q1	q2	NOTEST	0.00993886	0.0269653	1.43995	-0.427807	0.668792	1	no
C13B4.1	WBGene00007545	chrII:14470299-14479551	q1	q2	OK	12.7048	10.5965	-0.261793	0.723652	0.469279	0.999993	no
C13B7.6	WBGene00015731	chrV:2530144-2531173	q1	q2	OK	8.55723	7.15041	-0.259117	0.419754	0.674665	0.999993	no
C13B9.1	WBGene00015732	chrIII:6628235-6631487	q1	q2	OK	32.0245	33.3306	0.057672	-0.162818	0.870662	0.999993	no
C13B9.2	WBGene00015733	chrIII:6620213-6622156	q1	q2	OK	9.86705	9.88767	0.00301158	-0.00630458	0.99497	0.999993	no
C13B9.3	WBGene00015734	chrIII:6622622-6624919	q1	q2	OK	124.031	116.85	-0.0860403	0.321551	0.747793	0.999993	no
C13C12.2	WBGene00007552	chrV:12523628-12525637	q1	q2	OK	8.28594	7.60004	-0.124659	0.253226	0.800094	0.999993	no
C13C4.4	WBGene00007548	chrV:12109213-12110959	q1	q2	OK	28.4154	33.9589	0.257119	-0.624526	0.532282	0.999993	no
C13C4.5	WBGene00007549	chrV:12114973-12117415	q1	q2	OK	11.55	14.2254	0.300571	-0.695937	0.486468	0.999993	no
C13C4.6	WBGene00007550	chrV:12121649-12125077	q1	q2	OK	1.83609	2.17312	0.243128	-0.391027	0.695777	0.999993	no
C13C4.7	WBGene00007551	chrV:12118973-12120275	q1	q2	OK	1.18156	1.23225	0.0606041	-0.0745946	0.940537	0.999993	no
C13E3.1	WBGene00015740	chrX:8893103-8898464	q1	q2	OK	5.05229	6.20544	0.296597	-0.657944	0.510574	0.999993	no
C13F10.1	WBGene00015741	chrV:7224059-7225034	q1	q2	OK	10.8236	10.9199	0.0127781	-0.0180372	0.985609	0.999993	no
C13F10.2	WBGene00015742	chrV:7221460-7223261	q1	q2	OK	105.729	119.073	0.171479	-0.269069	0.787877	0.999993	no
C13F10.4	WBGene00015743	chrV:7205616-7214869	q1	q2	OK	72.4598	74.1956	0.0341523	-0.137375	0.890735	0.999993	no
C13F10.5	WBGene00015744	chrV:7215064-7219022	q1	q2	OK	68.0514	73.989	0.120687	-0.304453	0.760782	0.999993	no
C13F10.6	WBGene00015745	chrV:7219195-7220961	q1	q2	OK	70.0819	65.0637	-0.107189	0.34427	0.730644	0.999993	no
C13F10.7	WBGene00015746	chrV:7221460-7223261	q1	q2	OK	126.259	124.385	-0.0215736	0.0667113	0.946812	0.999993	no
C13G3.1	WBGene00007553	chrV:11011572-11012444	q1	q2	OK	0.388485	0.27164	-0.516166	0.541215	0.588359	0.999993	no
C13G5.2	WBGene00015747	chrIII:8616763-8618359	q1	q2	OK	63.345	65.5974	0.0504099	-0.151548	0.879544	0.999993	no
C14A11.2	WBGene00015748	chrX:2803103-2804822	q1	q2	OK	15.8012	17.6424	0.159018	-0.33613	0.736773	0.999993	no
C14A11.5	WBGene00015750	chrX:2805066-2807520	q1	q2	OK	3.63196	3.77015	0.0538725	-0.0948636	0.924423	0.999993	no
C14A11.6	WBGene00015751	chrX:2810517-2814117	q1	q2	OK	1.25285	1.58151	0.336099	-0.507097	0.612087	0.999993	no
C14A11.9	WBGene00050944	chrX:2807907-2809623	q1	q2	OK	6.33231	5.91467	-0.098433	0.171542	0.863798	0.999993	no
C14A4.11	WBGene00007561	chrII:10605663-10607216	q1	q2	OK	37.5553	31.1553	-0.26954	0.699429	0.484284	0.999993	no
C14A4.12	WBGene00007562	chrII:10612960-10618273	q1	q2	OK	2.36366	1.71958	-0.45897	0.713478	0.47555	0.999993	no
C14A4.13	WBGene00007563	chrII:10618411-10620404	q1	q2	NOTEST	0.236265	0.297408	0.33204	-0.405258	0.685288	1	no
C14A4.14	WBGene00007564	chrII:10582558-10584159	q1	q2	OK	56.312	65.8098	0.22486	-0.711402	0.476835	0.999993	no
C14A4.3	WBGene00007556	chrII:10584284-10587869	q1	q2	OK	54.3027	46.6415	-0.219408	0.719059	0.472104	0.999993	no
C14A4.6	WBGene00007557	chrII:10593473-10594719	q1	q2	OK	21.5181	26.6577	0.309005	-0.617204	0.5371	0.999993	no
C14A4.7	WBGene00007558	chrII:10595204-10596503	q1	q2	OK	8.24948	9.775	0.244793	-0.347806	0.727986	0.999993	no
C14A4.8	WBGene00007559	chrII:10597114-10598013	q1	q2	NOTEST	0.237874	0.296141	0.316087	-0.286349	0.774611	1	no
C14A4.9	WBGene00007560	chrII:10599270-10600470	q1	q2	OK	47.7522	44.5296	-0.100803	0.223481	0.823161	0.999993	no
C14A6.12	WBGene00050955	chrV:18162005-18162640	q1	q2	NOTEST	0	0	0	0	1	1	no
C14A6.13	WBGene00050956	chrV:18159624-18161280	q1	q2	NOTEST	0	0.0377717	1.79769e+308	1.79769e+308	0.21834	1	no
C14A6.2	C14A6.2	chrV:18148782-18154368	q1	q2	NOTEST	0.083258	0.0590025	-0.496812	0.376079	0.706858	1	no
C14A6.3	WBGene00007567	chrV:18146370-18148721	q1	q2	NOTEST	0.0210691	0.0452841	1.10388	-0.591879	0.553932	1	no
C14A6.5	WBGene00007569	chrV:18163463-18164800	q1	q2	NOTEST	0	0	0	0	1	1	no
C14A6.6	WBGene00007570	chrV:18165295-18167203	q1	q2	NOTEST	0.0322077	0.0268081	-0.264737	0.0873666	0.93038	1	no
C14A6.7	WBGene00007571	chrV:18167605-18168338	q1	q2	NOTEST	0	0	0	0	1	1	no
C14A6.8	WBGene00007572	chrV:18169058-18171590	q1	q2	NOTEST	0	0.050089	1.79769e+308	1.79769e+308	0.296723	1	no
C14B1.10	WBGene00007581	chrIII:3709311-3713264	q1	q2	OK	55.7929	60.2345	0.110508	-0.370055	0.711341	0.999993	no
C14B1.2	WBGene00007573	chrIII:3702263-3703151	q1	q2	OK	48.2689	35.3742	-0.448398	1.0917	0.274963	0.999993	no
C14B1.3	WBGene00007574	chrIII:3703629-3705009	q1	q2	OK	12.018	12.1965	0.0212718	-0.0454132	0.963778	0.999993	no
C14B1.5	WBGene00007576	chrIII:3706868-3709181	q1	q2	OK	77.7108	81.3468	0.0659707	-0.213998	0.830548	0.999993	no
C14B1.6	WBGene00007577	chrIII:3713444-3719655	q1	q2	OK	37.4813	39.4052	0.0722155	-0.210075	0.833609	0.999993	no
C14B1.8	WBGene00007579	chrIII:3713444-3719655	q1	q2	OK	75.6923	85.0823	0.168712	-0.330059	0.741355	0.999993	no
C14B1.9	WBGene00007580	chrIII:3724202-3726482	q1	q2	OK	40.8021	31.2163	-0.386343	1.14745	0.251198	0.999993	no
C14B4.2	WBGene00007583	chrV:19332695-19349458	q1	q2	OK	7.38628	8.32428	0.172477	-0.480105	0.631153	0.999993	no
C14B9.10	WBGene00015755	chrIII:8130797-8132375	q1	q2	OK	512.687	454.757	-0.172984	0.549941	0.58236	0.999993	no
C14B9.3	WBGene00015753	chrIII:8108723-8125409	q1	q2	OK	10.2294	11.8602	0.213409	-0.147338	0.882865	0.999993	no
C14B9.8	WBGene00015754	chrIII:8138023-8144563	q1	q2	OK	42.964	45.2487	0.0747471	-0.249754	0.802778	0.999993	no
C14C10.1	WBGene00007584	chrV:12588408-12589602	q1	q2	NOTEST	0.0233376	0.0988393	2.08243	-1.04928	0.294049	1	no
C14C10.2	WBGene00007585	chrV:12591011-12592459	q1	q2	OK	16.7414	16.5256	-0.0187156	0.0402886	0.967863	0.999993	no
C14C10.4	WBGene00007587	chrV:12592551-12596280	q1	q2	OK	34.3502	36.4339	0.0849639	-0.29065	0.771319	0.999993	no
C14C10.5	WBGene00007588	chrV:12600267-12607287	q1	q2	OK	46.0541	41.3638	-0.154959	0.591772	0.554003	0.999993	no
C14C10.6	WBGene00007589	chrV:12607396-12607945	q1	q2	OK	79.3282	79.1323	-0.00356702	0.00858905	0.993147	0.999993	no
C14C11.1	WBGene00015765	chrV:5663583-5665209	q1	q2	OK	0.450962	0.511507	0.181748	-0.235307	0.81397	0.999993	no
C14C11.2	WBGene00015766	chrV:5660911-5663357	q1	q2	OK	10.8279	9.18801	-0.236935	0.533341	0.593797	0.999993	no
C14C11.4	WBGene00015768	chrV:5647547-5651017	q1	q2	OK	0.719879	0.760073	0.0783826	-0.109392	0.912892	0.999993	no
C14C11.7	WBGene00015769	chrV:5665408-5666049	q1	q2	OK	145.658	126.492	-0.203536	0.402236	0.68751	0.999993	no
C14C6.12	WBGene00015763	chrV:570571-571178	q1	q2	NOTEST	0.0366496	0.0599585	0.710168	-0.240761	0.80974	1	no
C14C6.13	WBGene00015764	chrV:572031-574740	q1	q2	NOTEST	0	0	0	0	1	1	no
C14C6.2	WBGene00015756	chrV:563135-564312	q1	q2	NOTEST	0	0.0248661	1.79769e+308	1.79769e+308	0.285806	1	no
C14C6.3	WBGene00015757	chrV:543469-545360	q1	q2	NOTEST	0	0.0124628	1.79769e+308	1.79769e+308	0.285806	1	no
C14C6.5	WBGene00015759	chrV:536628-537419	q1	q2	OK	1.80859	1.74936	-0.04804	0.0565507	0.954903	0.999993	no
C14C6.6	WBGene00015760	chrV:545844-548049	q1	q2	NOTEST	0.00289775	0	-1.79769e+308	-1.79769e+308	0.350037	1	no
C14C6.7	WBGene00015761	chrV:548702-550654	q1	q2	NOTEST	0	0.00679086	1.79769e+308	1.79769e+308	0.296723	1	no
C14C6.8	WBGene00015762	chrV:551279-552979	q1	q2	NOTEST	0.0191474	0.0183182	-0.063877	0.0263383	0.978987	1	no
C14E2.1	WBGene00015770	chrX:1826459-1827348	q1	q2	OK	0.218668	0.414818	0.923741	-0.629893	0.528765	0.999993	no
C14E2.2	WBGene00015771	chrX:1806748-1809537	q1	q2	OK	0.424094	0.893482	1.07506	-1.49254	0.135557	0.999993	no
C14E2.3	WBGene00015772	chrX:1810679-1811530	q1	q2	NOTEST	0.0847962	0.110602	0.383299	-0.218052	0.827389	1	no
C14E2.4	WBGene00015773	chrX:1817549-1821318	q1	q2	NOTEST	0.0361045	0.0878281	1.2825	-0.869337	0.384663	1	no
C14E2.5	WBGene00015774	chrX:1823609-1825334	q1	q2	NOTEST	0.107964	0.133216	0.303208	-0.214322	0.830296	1	no
C14E2.6	WBGene00015775	chrX:1827731-1828481	q1	q2	NOTEST	0.115389	0.0955551	-0.272104	0.152351	0.87891	1	no
C14E2.7	WBGene00044562	chrX:1816354-1816756	q1	q2	OK	0.612285	0.638293	0.0600135	-0.0522988	0.958291	0.999993	no
C14F11.1	WBGene00015778	chrX:6240918-6242670	q1	q2	OK	63.4813	48.0328	-0.402313	1.20942	0.2265	0.999993	no
C14F11.2	WBGene00015779	chrX:6208730-6213876	q1	q2	OK	17.7536	15.6252	-0.184235	0.485561	0.627279	0.999993	no
C14F11.4	WBGene00015780	chrX:6231073-6233012	q1	q2	NOTEST	0.0348156	0.0504307	0.534568	-0.20158	0.840245	1	no
C14F11.6	WBGene00015781	chrX:6238090-6239051	q1	q2	OK	182.896	213.223	0.221346	-0.739818	0.45941	0.999993	no
C14F11.7	WBGene00015782	chrX:6208125-6208528	q1	q2	OK	3.58	5.41904	0.598075	-0.827908	0.407723	0.999993	no
C14H10.1	WBGene00007591	chrX:10233743-10236884	q1	q2	OK	21.8999	20.1153	-0.122631	0.297974	0.765723	0.999993	no
C14H10.2	WBGene00007592	chrX:10242277-10251295	q1	q2	OK	89.6701	107.711	0.264464	-0.889486	0.373742	0.999993	no
C14H10.3	WBGene00007593	chrX:10220586-10228076	q1	q2	OK	17.2784	18.3173	0.0842374	-0.226716	0.820644	0.999993	no
C15A11.2	WBGene00007597	chrI:7387353-7388713	q1	q2	NOTEST	0.0846396	0.18793	1.15079	-0.722492	0.469992	1	no
C15A11.4	WBGene00007598	chrI:7398904-7400794	q1	q2	OK	5.62804	8.95989	0.670849	-1.07077	0.284273	0.999993	no
C15A11.7	WBGene00007599	chrI:7405026-7408508	q1	q2	OK	0.86791	1.18374	0.447733	-0.355422	0.722273	0.999993	no
C15A7.2	WBGene00007595	chrX:12070808-12073771	q1	q2	OK	1.43929	1.45179	0.0124702	-0.0191677	0.984707	0.999993	no
C15B12.1	WBGene00015783	chrX:6476775-6478992	q1	q2	OK	6.01794	7.18265	0.255247	-0.475631	0.634337	0.999993	no
C15B12.2	WBGene00015784	chrX:6463374-6465396	q1	q2	NOTEST	0.08509	0.110265	0.37391	-0.278095	0.78094	1	no
C15B12.3	WBGene00015785	chrX:6467246-6467525	q1	q2	OK	1.07909	0.585122	-0.883009	0.605276	0.544996	0.999993	no
C15B12.4	WBGene00015786	chrX:6470328-6473711	q1	q2	NOTEST	0.0890831	0.131667	0.563669	-0.607523	0.543504	1	no
C15B12.6	WBGene00015787	chrX:6497882-6499799	q1	q2	OK	19.0794	22.7661	0.254871	-0.562352	0.573876	0.999993	no
C15B12.8	WBGene00015788	chrX:6474236-6476486	q1	q2	OK	0.555652	0.749611	0.43196	-0.598889	0.549247	0.999993	no
C15B12.9	WBGene00044573	chrX:6468761-6469766	q1	q2	OK	1.03768	0.861576	-0.26831	0.361318	0.717862	0.999993	no
C15C6.1	WBGene00007600	chrI:12202222-12203646	q1	q2	OK	19.957	18.8282	-0.0839971	0.166513	0.867753	0.999993	no
C15C6.2	WBGene00007601	chrI:12203790-12205796	q1	q2	OK	0.30236	0.447836	0.566707	-0.344111	0.730763	0.999993	no
C15C6.3	WBGene00007602	chrI:12207089-12212197	q1	q2	OK	35.8479	31.8532	-0.170452	0.53588	0.592042	0.999993	no
C15C6.4	WBGene00007603	chrI:12213120-12215170	q1	q2	OK	62.9757	66.1401	0.0707297	-0.185109	0.853144	0.999993	no
C15C7.1	WBGene00015789	chrX:3164514-3165640	q1	q2	OK	30.3658	29.6878	-0.0325804	0.071402	0.943078	0.999993	no
C15C7.4	WBGene00015790	chrX:3146562-3147078	q1	q2	NOTEST	0.145064	0.118959	-0.286219	0.149388	0.881247	1	no
C15C7.5	WBGene00015791	chrX:3151134-3152451	q1	q2	OK	39.8213	41.3876	0.0556564	-0.134536	0.892978	0.999993	no
C15C7.6	WBGene00015792	chrX:3165785-3170498	q1	q2	OK	0.208734	0.410985	0.97742	-0.263527	0.792144	0.999993	no
C15C7.7	WBGene00015793	chrX:3165785-3170498	q1	q2	OK	22.5668	26.4893	0.231203	-0.578523	0.562911	0.999993	no
C15C8.1	WBGene00007604	chrV:12734165-12736021	q1	q2	OK	0.679871	0.875234	0.364407	-0.483106	0.629021	0.999993	no
C15C8.3	WBGene00007605	chrV:12742023-12745033	q1	q2	OK	3.54378	4.56717	0.366011	-0.437131	0.662016	0.999993	no
C15C8.4	WBGene00007606	chrV:12745182-12747447	q1	q2	OK	36.1402	31.4661	-0.199806	0.540817	0.588634	0.999993	no
C15C8.5	WBGene00007607	chrV:12748274-12749946	q1	q2	OK	2.46071	3.82202	0.635262	-1.00555	0.314634	0.999993	no
C15C8.6	WBGene00007608	chrV:12750012-12751507	q1	q2	OK	0.289643	0.297458	0.0384104	-0.0425986	0.966021	0.999993	no
C15C8.7	WBGene00007609	chrV:12742023-12745033	q1	q2	OK	46.1967	33.2371	-0.474995	0.909592	0.363038	0.999993	no
C15C8.8	WBGene00045460	chrV:12751585-12752490	q1	q2	OK	1.25635	1.14218	-0.137441	0.16774	0.866788	0.999993	no
C15F1.1	WBGene00015794	chrII:6988735-6991540	q1	q2	OK	2.1285	1.95989	-0.119067	0.16025	0.872684	0.999993	no
C15F1.2	WBGene00015795	chrII:6979963-6988587	q1	q2	OK	1.57053	2.14429	0.449252	-0.769873	0.441375	0.999993	no
C15F1.5	WBGene00015796	chrII:6967877-6970543	q1	q2	OK	3.65871	4.79471	0.390108	-0.485822	0.627093	0.999993	no
C15F1.8	WBGene00015797	chrII:6976767-6977325	q1	q2	OK	10.8958	12.4693	0.194602	-0.326631	0.743947	0.999993	no
C15H11.1	WBGene00007613	chrV:14393842-14394429	q1	q2	NOTEST	0.0441111	0	-1.79769e+308	-1.79769e+308	0.303748	1	no
C15H11.10	WBGene00007618	chrV:14392256-14392757	q1	q2	NOTEST	0	0	0	0	1	1	no
C15H11.11	WBGene00007619	chrV:14415798-14417814	q1	q2	OK	3.61346	3.64917	0.0141872	-0.00387324	0.99691	0.999993	no
C15H11.13	WBGene00077576	chrV:14395054-14395734	q1	q2	NOTEST	0.0294126	0.0442398	0.588912	-0.168257	0.866381	1	no
C15H11.8	WBGene00007616	chrV:14422709-14423338	q1	q2	OK	112.702	118.266	0.0695138	-0.189358	0.849812	0.999993	no
C15H11.9	WBGene00007617	chrV:14423777-14424995	q1	q2	OK	106.507	111.273	0.0631541	-0.21365	0.83082	0.999993	no
C15H7.3	WBGene00007610	chrIII:9650336-9651875	q1	q2	NOTEST	0.0452702	0.0615292	0.44271	-0.298281	0.765488	1	no
C15H7.4	WBGene00007611	chrIII:9654324-9655775	q1	q2	NOTEST	0.0649367	0.0134215	-2.27449	0.824104	0.40988	1	no
C15H9.11	WBGene00015805	chrX:6101181-6105335	q1	q2	OK	7.30029	7.26497	-0.00699792	0.0036187	0.997113	0.999993	no
C15H9.2	WBGene00015798	chrX:6118740-6120401	q1	q2	OK	0.569917	0.590856	0.0520531	-0.0640246	0.948951	0.999993	no
C15H9.3	WBGene00015799	chrX:6115768-6118016	q1	q2	NOTEST	0.135789	0.227915	0.747137	-0.712422	0.476204	1	no
C15H9.4	WBGene00015800	chrX:6101181-6105335	q1	q2	OK	47.8843	48.6278	0.0222293	-0.0671175	0.946488	0.999993	no
C15H9.5	WBGene00015801	chrX:6093250-6097529	q1	q2	OK	20.3034	20.1149	-0.0134514	0.0380598	0.96964	0.999993	no
C15H9.9	WBGene00015803	chrX:6122279-6128291	q1	q2	OK	52.1019	56.6481	0.120691	-0.227668	0.819905	0.999993	no
C16A11.2	WBGene00015815	chrII:4238175-4244832	q1	q2	OK	43.6519	45.2952	0.0533128	-0.145376	0.884414	0.999993	no
C16A11.3	WBGene00015816	chrII:4229553-4234326	q1	q2	OK	2.23442	1.30534	-0.775471	1.31337	0.189059	0.999993	no
C16A11.4	WBGene00015817	chrII:4227048-4229135	q1	q2	OK	13.6185	10.1714	-0.421044	0.95308	0.34055	0.999993	no
C16A11.5	WBGene00015818	chrII:4223316-4226256	q1	q2	OK	1.14378	0.705029	-0.698058	1.07491	0.282414	0.999993	no
C16A11.7	WBGene00015820	chrII:4255922-4256942	q1	q2	NOTEST	0.151712	0.228706	0.592158	-0.507062	0.612112	1	no
C16A3.10	WBGene00015814	chrIII:6394181-6396129	q1	q2	OK	42.012	37.5305	-0.162736	0.383313	0.701487	0.999993	no
C16A3.2	WBGene00015807	chrIII:6389779-6390596	q1	q2	OK	22.2642	20.5336	-0.116739	0.239163	0.810979	0.999993	no
C16A3.4	WBGene00015809	chrIII:6381578-6382971	q1	q2	OK	134.129	144.267	0.105113	-0.377477	0.705819	0.999993	no
C16A3.5	WBGene00015810	chrIII:6380641-6381459	q1	q2	OK	179.755	162.097	-0.149181	0.491284	0.623226	0.999993	no
C16A3.6	WBGene00015811	chrIII:6379395-6380603	q1	q2	OK	188.275	223.573	0.247905	-0.921929	0.356566	0.999993	no
C16B8.2	WBGene00015822	chrX:3958476-3965814	q1	q2	OK	1.21978	1.22173	0.00229796	-0.00227768	0.998183	0.999993	no
C16B8.3	WBGene00015823	chrX:3968015-3968617	q1	q2	OK	0.932302	0.408289	-1.19121	1.28936	0.197272	0.999993	no
C16B8.4	WBGene00015824	chrX:3970368-3973614	q1	q2	OK	23.5355	26.74	0.18416	-0.508851	0.610857	0.999993	no
C16C10.1	WBGene00007622	chrIII:4179035-4181414	q1	q2	OK	15.8545	12.7658	-0.312605	0.66958	0.503125	0.999993	no
C16C10.13	WBGene00007632	chrIII:4176675-4178640	q1	q2	OK	1.26807	1.30903	0.0458673	-0.0153641	0.987742	0.999993	no
C16C10.2	WBGene00007623	chrIII:4176675-4178640	q1	q2	OK	77.6102	77.887	0.00513537	-0.0153343	0.987765	0.999993	no
C16C10.3	WBGene00007624	chrIII:4172308-4176133	q1	q2	OK	61.7505	50.4184	-0.2925	1.05162	0.292974	0.999993	no
C16C10.4	WBGene00007625	chrIII:4171309-4172152	q1	q2	OK	298.344	307.555	0.0438689	-0.154332	0.877348	0.999993	no
C16C10.8	WBGene00007628	chrIII:4161922-4164146	q1	q2	OK	72.0277	85.511	0.247559	-0.729745	0.465546	0.999993	no
C16C10.9	WBGene00007629	chrIII:4155361-4157354	q1	q2	OK	1.14657	1.14238	-0.00527819	0.00721245	0.994245	0.999993	no
C16C2.4	WBGene00007621	chrI:9712814-9715221	q1	q2	OK	101.45	116.074	0.194273	-0.66481	0.506172	0.999993	no
C16C4.1	WBGene00015825	chrII:1894342-1894687	q1	q2	NOTEST	0	0	0	0	1	1	no
C16C4.17	WBGene00044359	chrII:1864736-1864889	q1	q2	OK	77.665	104.637	0.430062	-0.622305	0.533741	0.999993	no
C16C8.10	WBGene00015848	chrII:3464157-3464683	q1	q2	NOTEST	0	0	0	0	1	1	no
C16C8.11	WBGene00015849	chrII:3453766-3454615	q1	q2	OK	20.725	18.9233	-0.131205	0.273424	0.784527	0.999993	no
C16C8.12	WBGene00015850	chrII:3452733-3453605	q1	q2	OK	4.83104	3.12281	-0.62949	0.975263	0.32943	0.999993	no
C16C8.13	WBGene00015851	chrII:3451423-3452332	q1	q2	OK	0.378461	0.170652	-1.14909	1.01585	0.3097	0.999993	no
C16C8.14	WBGene00015852	chrII:3449255-3450997	q1	q2	OK	3.75334	2.71826	-0.465493	0.772798	0.439642	0.999993	no
C16C8.16	WBGene00015853	chrII:3445767-3448742	q1	q2	OK	14.6527	10.9273	-0.423224	1.01126	0.311893	0.999993	no
C16C8.17	WBGene00015854	chrII:3440829-3442448	q1	q2	NOTEST	0.0750927	0.0534871	-0.489483	0.298289	0.765483	1	no
C16C8.18	WBGene00015855	chrII:3429408-3431236	q1	q2	NOTEST	0.173799	0.0962421	-0.852676	0.647949	0.517018	1	no
C16C8.19	WBGene00015856	chrII:3458503-3459026	q1	q2	NOTEST	0	0	0	0	1	1	no
C16C8.2	WBGene00015841	chrII:3431289-3436515	q1	q2	OK	6.29477	5.85561	-0.104334	0.220125	0.825773	0.999993	no
C16C8.4	WBGene00015842	chrII:3443585-3444368	q1	q2	OK	20.0433	15.3173	-0.387957	0.760285	0.447084	0.999993	no
C16C8.5	WBGene00015843	chrII:3444730-3445367	q1	q2	OK	13.0771	10.8129	-0.274292	0.477522	0.63299	0.999993	no
C16C8.7	WBGene00015845	chrII:3459621-3460317	q1	q2	NOTEST	0.0379948	0	-1.79769e+308	-1.79769e+308	0.233794	1	no
C16C8.8	WBGene00015846	chrII:3461155-3461684	q1	q2	NOTEST	0	0	0	0	1	1	no
C16C8.9	WBGene00015847	chrII:3462612-3463197	q1	q2	NOTEST	0.0270182	0	-1.79769e+308	-1.79769e+308	0.303748	1	no
C16D2.1	WBGene00007633	chrII:9132152-9134477	q1	q2	NOTEST	0.146248	0.132694	-0.140316	0.0493235	0.960661	1	no
C16D6.1	WBGene00007634	chrX:12525274-12526152	q1	q2	OK	0.629255	0.578415	-0.121541	0.137646	0.890521	0.999993	no
C16D6.2	WBGene00007635	chrX:12536944-12551608	q1	q2	OK	0.639547	0.773049	0.27351	-0.397961	0.690659	0.999993	no
C16D6.3	WBGene00007636	chrX:12526590-12527217	q1	q2	NOTEST	0.0153672	0.0741271	2.27014	-0.543194	0.586996	1	no
C16D9.1	WBGene00015857	chrV:7731614-8316095	q1	q2	OK	0.654424	0.904247	0.466491	-0.0253472	0.979778	0.999993	no
C16D9.3	WBGene00015858	chrV:7731614-8316095	q1	q2	OK	1.75608	2.76311	0.653935	-0.0276245	0.977962	0.999993	no
C16D9.4	WBGene00015859	chrV:7731614-8316095	q1	q2	OK	4.12971	5.13602	0.314611	-0.0404751	0.967714	0.999993	no
C16D9.5	WBGene00015860	chrV:7731614-8316095	q1	q2	OK	0.340221	0.310073	-0.133868	0.00430381	0.996566	0.999993	no
C16D9.6	WBGene00015861	chrV:7731614-8316095	q1	q2	OK	7.25383	6.27257	-0.209687	0.0285688	0.977208	0.999993	no
C16D9.8	WBGene00015863	chrV:7731614-8316095	q1	q2	NOTEST	0	0	0	0	1	1	no
C16D9.9	WBGene00015864	chrV:7731614-8316095	q1	q2	OK	0.71007	1.3273	0.90246	-0.020125	0.983944	0.999993	no
C16E9.1	WBGene00015865	chrX:6940437-6943572	q1	q2	NOTEST	0.257127	0.219905	-0.225602	0.274284	0.783867	1	no
C16E9.2	WBGene00015866	chrX:6935703-6938995	q1	q2	OK	29.1276	31.3494	0.106049	-0.138552	0.889804	0.999993	no
C16H3.1	WBGene00015867	chrX:17617750-17619382	q1	q2	OK	0.445047	0.438039	-0.0228994	0.0241395	0.980741	0.999993	no
C16H3.3	WBGene00015868	chrX:17601553-17609972	q1	q2	OK	25.0206	20.7002	-0.273471	0.801698	0.422727	0.999993	no
C17A2.2	WBGene00015870	chrII:3846329-3848145	q1	q2	NOTEST	0.00620866	0.0110527	0.832044	-0.229653	0.818361	1	no
C17A2.3	WBGene00015871	chrII:3843610-3845511	q1	q2	NOTEST	0.00865379	0	-1.79769e+308	-1.79769e+308	0.303748	1	no
C17A2.4	WBGene00015872	chrII:3839863-3841274	q1	q2	NOTEST	0	0.0165355	1.79769e+308	1.79769e+308	0.264219	1	no
C17A2.7	WBGene00015875	chrII:3841915-3843407	q1	q2	NOTEST	0	0	0	0	1	1	no
C17B7.10	WBGene00015884	chrV:3340175-3342742	q1	q2	NOTEST	0.0123227	0.0439728	1.83529	-0.902507	0.366788	1	no
C17B7.12	WBGene00015886	chrV:3353259-3353918	q1	q2	NOTEST	0.0131509	0.072829	2.46935	-0.597573	0.550125	1	no
C17B7.2	WBGene00015876	chrV:3348626-3350964	q1	q2	NOTEST	0.046411	0.0121307	-1.9358	0.685911	0.492769	1	no
C17B7.3	WBGene00015877	chrV:3342800-3343862	q1	q2	NOTEST	0.0778886	0.0436194	-0.836441	0.382119	0.702373	1	no
C17B7.4	WBGene00015878	chrV:3339344-3340028	q1	q2	NOTEST	0.0106852	0	-1.79769e+308	-1.79769e+308	0.350037	1	no
C17B7.5	WBGene00015879	chrV:3333637-3339002	q1	q2	NOTEST	0.0293283	0.0482141	0.717163	-0.592746	0.553351	1	no
C17B7.8	WBGene00015882	chrV:3320744-3324109	q1	q2	NOTEST	0.0133366	0.00712167	-0.905105	0.294588	0.768309	1	no
C17B7.9	WBGene00015883	chrV:3330911-3332110	q1	q2	NOTEST	0	0.0233675	1.79769e+308	1.79769e+308	0.296723	1	no
C17C3.1	WBGene00015887	chrII:5570619-5574924	q1	q2	OK	33.0612	41.0589	0.312553	-0.646743	0.517799	0.999993	no
C17C3.11	WBGene00015893	chrII:5537817-5538987	q1	q2	NOTEST	0.00589536	0.0133962	1.18417	-0.256407	0.797636	1	no
C17C3.13	WBGene00015895	chrII:5567768-5568379	q1	q2	NOTEST	0.217413	0.283497	0.382895	-0.310098	0.756486	1	no
C17C3.15	WBGene00015896	chrII:5570619-5574924	q1	q2	OK	2.05498	1.91951	-0.0983854	0.0333221	0.973418	0.999993	no
C17C3.3	WBGene00015889	chrII:5561745-5563506	q1	q2	OK	3.17107	4.03446	0.347405	-0.57572	0.564805	0.999993	no
C17C3.5	WBGene00015890	chrII:5551917-5552301	q1	q2	OK	0.350689	0.344138	-0.0272064	0.0160603	0.987186	0.999993	no
C17C3.6	WBGene00015891	chrII:5550028-5550513	q1	q2	OK	2.67997	2.96575	0.146182	-0.204234	0.83817	0.999993	no
C17C3.9	WBGene00015892	chrII:5531380-5532237	q1	q2	NOTEST	0.128592	0.225067	0.807549	-0.452866	0.650645	1	no
C17D12.1	WBGene00007637	chrI:11611662-11616130	q1	q2	OK	16.2974	15.4421	-0.0777747	0.165115	0.868854	0.999993	no
C17D12.3	WBGene00007638	chrI:11616806-11620254	q1	q2	OK	0.485403	0.501693	0.0476211	-0.0631328	0.949661	0.999993	no
C17D12.5	WBGene00007639	chrI:11586226-11587285	q1	q2	NOTEST	0.178661	0.130996	-0.4477	0.237752	0.812073	1	no
C17D12.7	WBGene00007640	chrI:11604601-11611292	q1	q2	OK	64.7662	59.3161	-0.126816	0.425686	0.670337	0.999993	no
C17D12.9	WBGene00086552	chrI:11621566-11621890	q1	q2	OK	0.61844	0.382419	-0.693479	0.366872	0.713714	0.999993	no
C17E4.1	WBGene00007641	chrI:9408348-9410087	q1	q2	OK	4.86206	5.84926	0.266687	-0.382705	0.701938	0.999993	no
C17E4.10	WBGene00007647	chrI:9435369-9450724	q1	q2	OK	119.374	131.947	0.144474	-0.465469	0.641596	0.999993	no
C17E4.11	WBGene00044236	chrI:9419415-9420806	q1	q2	OK	33.8571	35.6469	0.0743172	-0.168118	0.866491	0.999993	no
C17E4.2	WBGene00007642	chrI:9410606-9416695	q1	q2	OK	196.546	230.494	0.229862	-0.928381	0.35321	0.999993	no
C17E4.3	WBGene00007643	chrI:9416892-9418866	q1	q2	OK	33.068	28.1572	-0.23193	0.612894	0.539946	0.999993	no
C17E4.4	WBGene00007644	chrI:9419415-9420806	q1	q2	OK	7.62848	4.971	-0.617859	0.430806	0.666609	0.999993	no
C17E4.6	WBGene00007645	chrI:9422548-9431105	q1	q2	OK	32.0866	25.5062	-0.331122	0.942101	0.346141	0.999993	no
C17E4.9	WBGene00007646	chrI:9431241-9433818	q1	q2	OK	34.8222	37.431	0.104225	-0.321325	0.747964	0.999993	no
C17E7.10	WBGene00015904	chrV:3898784-3900187	q1	q2	NOTEST	0	0.0394719	1.79769e+308	1.79769e+308	0.158367	1	no
C17E7.12	WBGene00015905	chrV:3890950-3892011	q1	q2	OK	110.89	118.984	0.101633	-0.24665	0.805179	0.999993	no
C17E7.13	WBGene00015906	chrV:3887734-3889238	q1	q2	OK	9.61274	11.3594	0.240867	-0.451721	0.65147	0.999993	no
C17E7.4	WBGene00015899	chrV:3892840-3894558	q1	q2	OK	71.1671	67.3793	-0.0789051	0.246414	0.805362	0.999993	no
C17E7.9	WBGene00015903	chrV:3889367-3890846	q1	q2	OK	26.4188	24.3556	-0.117314	0.25418	0.799357	0.999993	no
C17F3.1	WBGene00015907	chrI:6665183-6670404	q1	q2	NOTEST	0.0537631	0.109563	1.02708	-0.0934186	0.925571	1	no
C17F3.3	WBGene00015908	chrI:6682368-6683373	q1	q2	NOTEST	0.0335006	0.0187611	-0.836441	0.270199	0.787007	1	no
C17F4.11	WBGene00044373	chrII:3237478-3238060	q1	q2	OK	0.578278	0.720212	0.316659	-0.30073	0.76362	0.999993	no
C17F4.12	WBGene00044374	chrII:3243694-3244159	q1	q2	OK	0.30581	0.344816	0.173191	-0.104899	0.916456	0.999993	no
C17F4.2	WBGene00015910	chrII:3248694-3249391	q1	q2	OK	5.90238	7.84776	0.410984	-0.575349	0.565055	0.999993	no
C17F4.3	WBGene00015911	chrII:3240547-3241730	q1	q2	OK	0.698563	0.638175	-0.130439	0.155366	0.876533	0.999993	no
C17F4.7	WBGene00015913	chrII:3245090-3246019	q1	q2	OK	6.14988	6.02667	-0.0291958	0.045354	0.963825	0.999993	no
C17F4.8	WBGene00015914	chrII:3230879-3234816	q1	q2	OK	18.8368	22.5585	0.260117	-0.511735	0.608836	0.999993	no
C17G1.1	WBGene00007648	chrX:9919243-9920288	q1	q2	NOTEST	0.054939	0.115793	1.07564	-0.67196	0.501609	1	no
C17G1.2	WBGene00007649	chrX:9921499-9922708	q1	q2	OK	0.893167	1.08146	0.275979	-0.377097	0.706101	0.999993	no
C17G1.4	WBGene00007651	chrX:9925864-9931402	q1	q2	OK	15.7923	13.0121	-0.279368	0.646932	0.517676	0.999993	no
C17G1.5	WBGene00007652	chrX:9941571-9944715	q1	q2	OK	31.6512	38.3066	0.275333	-0.74321	0.457355	0.999993	no
C17G1.7	WBGene00007653	chrX:9952522-9954482	q1	q2	OK	100.331	123.66	0.301621	-1.02564	0.305063	0.999993	no
C17G10.1	WBGene00015915	chrII:5596541-5598432	q1	q2	OK	63.1348	67.4024	0.094365	-0.308391	0.757785	0.999993	no
C17G10.2	WBGene00015916	chrII:5594717-5596339	q1	q2	OK	47.9283	47.5208	-0.0123208	0.0361767	0.971141	0.999993	no
C17G10.3	WBGene00015917	chrII:5583018-5584731	q1	q2	OK	0.276194	0.409098	0.566766	-0.689851	0.490288	0.999993	no
C17G10.6	WBGene00015918	chrII:5599911-5603276	q1	q2	NOTEST	0.257859	0.268881	0.0603869	-0.0798638	0.936346	1	no
C17G10.7	WBGene00015919	chrII:5606776-5607806	q1	q2	OK	2.47648	2.55692	0.0461212	-0.0641888	0.94882	0.999993	no
C17G10.9	WBGene00015920	chrII:5619571-5622467	q1	q2	OK	117.815	106.889	-0.140402	0.44831	0.653929	0.999993	no
C17H1.10	WBGene00044237	chrI:13133636-13136145	q1	q2	NOTEST	0.0644461	0.0680662	0.0788442	-0.0553704	0.955843	1	no
C17H1.13	WBGene00044708	chrI:13124069-13125673	q1	q2	NOTEST	0.0508186	0	-1.79769e+308	-1.79769e+308	0.116293	1	no
C17H1.14	WBGene00044709	chrI:13107480-13109611	q1	q2	NOTEST	0.0289965	0.0095044	-1.60921	0.527864	0.597594	1	no
C17H1.2	WBGene00007655	chrI:13102779-13103048	q1	q2	NOTEST	0	0.261239	1.79769e+308	1.79769e+308	0.285806	1	no
C17H1.3	WBGene00007656	chrI:13104241-13106287	q1	q2	NOTEST	0.0451173	0.075738	0.747335	-0.499261	0.617596	1	no
C17H1.4	WBGene00007657	chrI:13110522-13112419	q1	q2	NOTEST	0.0370133	0.0249758	-0.567514	0.254754	0.798913	1	no
C17H1.5	WBGene00007658	chrI:13113625-13116423	q1	q2	NOTEST	0.0230102	0.0157467	-0.547228	0.191415	0.848201	1	no
C17H1.6	WBGene00007659	chrI:13130796-13132453	q1	q2	NOTEST	0.0728094	0.118631	0.704287	-0.574103	0.565898	1	no
C17H1.7	WBGene00007660	chrI:13136574-13138510	q1	q2	NOTEST	0.0564357	0.112897	1.00033	-0.792625	0.427996	1	no
C17H1.8	WBGene00007661	chrI:13128458-13130159	q1	q2	NOTEST	0.00921103	0.0166479	0.853909	-0.235688	0.813674	1	no
C17H1.9	WBGene00007662	chrI:13121080-13123502	q1	q2	NOTEST	0.0206191	0.0567045	1.45948	-0.723726	0.469234	1	no
C17H11.1	WBGene00015921	chrX:8173859-8180815	q1	q2	OK	0.498635	0.727949	0.545854	-0.683772	0.494119	0.999993	no
C17H11.2	WBGene00015922	chrX:8169879-8172818	q1	q2	OK	7.19106	6.13136	-0.229996	0.522066	0.601624	0.999993	no
C17H11.4	WBGene00015924	chrX:8180980-8181590	q1	q2	OK	4.02549	3.62598	-0.150794	0.202765	0.839319	0.999993	no
C17H11.5	WBGene00015925	chrX:8183053-8183487	q1	q2	OK	2.8611	4.18624	0.549086	-0.695847	0.486525	0.999993	no
C17H12.10	WBGene00015935	chrIV:6806816-6809610	q1	q2	OK	0.911744	1.06196	0.220034	-0.255529	0.798314	0.999993	no
C17H12.11	WBGene00015936	chrIV:6804767-6805991	q1	q2	OK	0.84626	1.30814	0.628342	-0.739324	0.45971	0.999993	no
C17H12.12	WBGene00015937	chrIV:6795429-6798539	q1	q2	OK	0.597819	0.665242	0.154171	-0.225157	0.821857	0.999993	no
C17H12.13	WBGene00015938	chrIV:6770798-6779848	q1	q2	OK	55.5181	52.2633	-0.0871593	0.227779	0.819818	0.999993	no
C17H12.2	WBGene00015928	chrIV:6786846-6789610	q1	q2	OK	72.8767	67.8545	-0.103013	0.358178	0.72021	0.999993	no
C17H12.3	WBGene00015929	chrIV:6793907-6795213	q1	q2	OK	0.409232	0.413341	0.0144142	-0.018829	0.984978	0.999993	no
C17H12.5	WBGene00015931	chrIV:6815927-6817566	q1	q2	NOTEST	0.0715424	0.200713	1.48826	-1.42169	0.155117	1	no
C17H12.6	WBGene00015932	chrIV:6821330-6822477	q1	q2	NOTEST	0.0322793	0.0154406	-1.06388	0.352014	0.724827	1	no
C17H12.8	WBGene00015933	chrIV:6818594-6820632	q1	q2	OK	1.67613	2.62157	0.645302	-1.00335	0.315691	0.999993	no
C18A11.1	WBGene00015947	chrX:8069537-8070238	q1	q2	OK	2.59272	3.99391	0.623334	-0.856759	0.391578	0.999993	no
C18A11.2	WBGene00015948	chrX:8067637-8067973	q1	q2	OK	4.47835	5.47984	0.291165	-0.290577	0.771375	0.999993	no
C18A11.3	WBGene00015949	chrX:8061080-8065544	q1	q2	OK	5.08418	6.13419	0.270858	-0.415463	0.677803	0.999993	no
C18A11.4	WBGene00015950	chrX:8045502-8047367	q1	q2	NOTEST	0.171682	0.0929764	-0.884802	0.508933	0.610799	1	no
C18A11.6	WBGene00015951	chrX:8033322-8034768	q1	q2	OK	0.168302	0.372177	1.14494	-0.953697	0.340237	0.999993	no
C18A3.1	WBGene00015939	chrII:5720143-5727653	q1	q2	OK	25.4367	23.548	-0.111307	0.255753	0.798142	0.999993	no
C18A3.10	WBGene00015946	chrII:5714904-5716231	q1	q2	OK	8.54187	7.87686	-0.116931	0.155245	0.876628	0.999993	no
C18A3.11	WBGene00044668	chrII:5731013-5731722	q1	q2	NOTEST	0.0666723	0.0875906	0.393688	-0.209596	0.833983	1	no
C18A3.2	WBGene00015940	chrII:5718125-5719968	q1	q2	OK	58.0436	55.1579	-0.0735685	0.220178	0.825732	0.999993	no
C18A3.3	WBGene00015941	chrII:5716287-5718020	q1	q2	OK	98.1476	111.723	0.186896	-0.633229	0.526584	0.999993	no
C18A3.4	WBGene00015942	chrII:5707671-5712316	q1	q2	OK	9.52886	10.1556	0.0919066	-0.155273	0.876606	0.999993	no
C18A3.5	WBGene00015943	chrII:5712335-5714804	q1	q2	OK	256.111	230.673	-0.15092	0.452247	0.651091	0.999993	no
C18A3.7	WBGene00015944	chrII:5729629-5730403	q1	q2	OK	0.454174	0.648791	0.514508	-0.474336	0.63526	0.999993	no
C18A3.9	WBGene00015945	chrII:5714904-5716231	q1	q2	OK	2.0438	2.25483	0.141765	-0.103686	0.917418	0.999993	no
C18B10.6	WBGene00015963	chrV:7479269-7481030	q1	q2	OK	0.702489	0.997385	0.505675	-0.724283	0.468892	0.999993	no
C18B12.1	WBGene00007663	chrX:15012613-15012792	q1	q2	OK	0.822606	0.494778	-0.733419	0.220976	0.825111	0.999993	no
C18B12.2	WBGene00007664	chrX:15026237-15031006	q1	q2	OK	1.46186	1.60846	0.13787	-0.200046	0.841444	0.999993	no
C18B12.4	WBGene00007666	chrX:15036626-15040532	q1	q2	OK	61.8609	64.4104	0.0582652	-0.19391	0.846247	0.999993	no
C18B12.6	WBGene00007668	chrX:15003997-15007238	q1	q2	OK	28.4315	33.7155	0.245919	-0.728184	0.466501	0.999993	no
C18B2.1	WBGene00015952	chrX:3623508-3630871	q1	q2	NOTEST	0.136423	0.11334	-0.267429	0.162696	0.870758	1	no
C18B2.2	WBGene00015953	chrX:3623508-3630871	q1	q2	NOTEST	0.108697	0.14859	0.451034	-0.388634	0.697547	1	no
C18B2.3	WBGene00015954	chrX:3601786-3604273	q1	q2	OK	4.19211	3.79232	-0.144596	0.218761	0.826836	0.999993	no
C18B2.4	WBGene00015955	chrX:3604334-3605737	q1	q2	OK	9.93211	7.36652	-0.431117	0.84912	0.395814	0.999993	no
C18B2.5	WBGene00015956	chrX:3606726-3611081	q1	q2	OK	6.48952	6.06461	-0.0976978	0.172454	0.86308	0.999993	no
C18B2.6	WBGene00015957	chrX:3613383-3617365	q1	q2	OK	0.238845	0.362918	0.603568	-0.76114	0.446574	0.999993	no
C18C4.5	WBGene00015966	chrV:5550300-5557265	q1	q2	OK	53.3629	63.729	0.256112	-0.812456	0.41653	0.999993	no
C18C4.7	WBGene00015968	chrV:5564289-5567203	q1	q2	OK	13.9729	16.9544	0.279028	-0.557627	0.577099	0.999993	no
C18D1.2	WBGene00007669	chrII:10056251-10060523	q1	q2	NOTEST	0.140598	0.213453	0.602337	-0.417133	0.676581	1	no
C18D11.1	WBGene00007679	chrIII:11816477-11822415	q1	q2	OK	14.4098	12.4639	-0.209292	0.334334	0.738128	0.999993	no
C18D11.3	WBGene00007681	chrIII:11823347-11824340	q1	q2	OK	19.2197	14.1265	-0.444185	0.91376	0.360843	0.999993	no
C18D11.6	WBGene00007682	chrIII:11809896-11810946	q1	q2	OK	0.373636	0.291258	-0.359338	0.22536	0.821699	0.999993	no
C18D11.7	WBGene00044232	chrIII:11804446-11806679	q1	q2	OK	0.639446	0.693089	0.116218	-0.15379	0.877775	0.999993	no
C18D11.9	WBGene00045211	chrIII:11808234-11809461	q1	q2	NOTEST	0	0.0699453	1.79769e+308	1.79769e+308	0.296723	1	no
C18D4.3	WBGene00007673	chrV:17532326-17532760	q1	q2	NOTEST	0	0.0680193	1.79769e+308	1.79769e+308	0.264219	1	no
C18D4.4	WBGene00007674	chrV:17530476-17531484	q1	q2	NOTEST	0.0514548	0.0656404	0.351278	-0.0955446	0.923882	1	no
C18D4.6	WBGene00007675	chrV:17535805-17538347	q1	q2	OK	17.1855	35.823	1.05969	-1.9397	0.0524159	0.999993	no
C18D4.8	WBGene00007677	chrV:17544148-17546959	q1	q2	NOTEST	0.0768013	0.129426	0.752925	-0.772317	0.439927	1	no
C18E3.1	WBGene00015970	chrI:4212743-4214263	q1	q2	OK	0.573634	0.725344	0.338534	-0.44533	0.656081	0.999993	no
C18E3.2	WBGene00015971	chrI:4210980-4212669	q1	q2	OK	134.201	129.91	-0.0468805	0.171853	0.863553	0.999993	no
C18E3.3	WBGene00015972	chrI:4203459-4208521	q1	q2	OK	44.0314	46.5154	0.0791783	-0.273081	0.784791	0.999993	no
C18E3.4	WBGene00015973	chrI:4193242-4203307	q1	q2	OK	4.00061	3.36625	-0.249078	0.113521	0.909617	0.999993	no
C18E3.5	WBGene00015974	chrI:4193242-4203307	q1	q2	OK	27.0233	27.3989	0.0199137	-0.0491913	0.960767	0.999993	no
C18E3.9	WBGene00015976	chrI:4214297-4215754	q1	q2	OK	13.3125	8.66458	-0.619577	1.18028	0.23789	0.999993	no
C18E9.10	WBGene00007690	chrII:8955177-8964081	q1	q2	OK	31.9688	26.1119	-0.291958	0.655546	0.512116	0.999993	no
C18E9.2	WBGene00007683	chrII:8964990-8966857	q1	q2	OK	189.544	190.628	0.00822864	-0.030819	0.975414	0.999993	no
C18E9.4	WBGene00007684	chrII:8964187-8964828	q1	q2	OK	318.65	320.465	0.00819397	-0.0252704	0.979839	0.999993	no
C18E9.5	WBGene00007685	chrII:8969920-8971904	q1	q2	OK	8.00633	9.35812	0.225078	-0.411988	0.680348	0.999993	no
C18E9.6	WBGene00007686	chrII:8971924-8973504	q1	q2	OK	110.527	107.161	-0.0446093	0.154261	0.877404	0.999993	no
C18E9.7	WBGene00007687	chrII:8978517-8982616	q1	q2	OK	6.15801	7.42961	0.270822	-0.601326	0.547623	0.999993	no
C18E9.8	WBGene00007688	chrII:8985957-8987959	q1	q2	NOTEST	0.0120062	0.00598835	-1.00354	0.311459	0.755452	1	no
C18E9.9	WBGene00007689	chrII:8988313-8989482	q1	q2	OK	18.5272	21.3571	0.205072	-0.387224	0.69859	0.999993	no
C18F10.2	WBGene00015977	chrIII:6273107-6275964	q1	q2	NOTEST	0.266961	0.26844	0.00796836	-0.0101695	0.991886	1	no
C18F10.7	WBGene00015978	chrIII:6276003-6278305	q1	q2	OK	49.4369	48.8068	-0.0185076	0.0587734	0.953133	0.999993	no
C18F10.9	WBGene00015979	chrIII:6271508-6272907	q1	q2	OK	0.116357	0.336346	1.53138	-1.10026	0.27122	0.999993	no
C18F3.4	WBGene00044508	chrIV:8083946-8086638	q1	q2	OK	92.646	105.735	0.190656	-0.604761	0.545338	0.999993	no
C18G1.1	WBGene00015980	chrV:4779212-4779893	q1	q2	OK	3.2708	2.79458	-0.227016	0.289001	0.772581	0.999993	no
C18G1.3	WBGene00015982	chrV:4761512-4764165	q1	q2	NOTEST	0.0256142	0.0340016	0.408655	-0.187019	0.851646	1	no
C18G1.6	WBGene00015984	chrV:4750579-4753794	q1	q2	NOTEST	0.252567	0.319507	0.33918	-0.414231	0.678705	1	no
C18G1.7	WBGene00015985	chrV:4745554-4748075	q1	q2	NOTEST	0.0451141	0.0293491	-0.62026	0.317036	0.751216	1	no
C18G1.8	WBGene00015986	chrV:4764251-4766688	q1	q2	NOTEST	0.0219292	0	-1.79769e+308	-1.79769e+308	0.199884	1	no
C18G1.9	WBGene00015987	chrV:4767873-4769681	q1	q2	NOTEST	0.114971	0.125131	0.122168	-0.109088	0.913132	1	no
C18H2.1	WBGene00015988	chrIII:7662362-7672088	q1	q2	NOTEST	0.232915	0.297312	0.352173	-0.527618	0.597764	1	no
C18H2.2	WBGene00015989	chrIII:7678954-7680792	q1	q2	OK	30.9395	29.5528	-0.0661572	0.181552	0.855935	0.999993	no
C18H2.3	WBGene00015990	chrIII:7684304-7687092	q1	q2	NOTEST	0.0299443	0.0334111	0.158046	-0.111132	0.911511	1	no
C18H2.4	WBGene00015991	chrIII:7694624-7709407	q1	q2	OK	0.285307	0.317115	0.152495	-0.0250444	0.98002	0.999993	no
C18H2.5	WBGene00015992	chrIII:7689290-7694179	q1	q2	NOTEST	0.188247	0.290981	0.628297	-0.868031	0.385377	1	no
C18H7.1	WBGene00015993	chrIV:615543-620931	q1	q2	NOTEST	0.24942	0.172322	-0.533474	0.511211	0.609203	1	no
C18H7.10	C18H7.10	chrIV:583812-585912	q1	q2	NOTEST	0.0772681	0.13016	0.752338	-0.606034	0.544492	1	no
C18H7.11	WBGene00044457	chrIV:596904-598769	q1	q2	NOTEST	0.0508666	0.100908	0.988245	-0.799105	0.42423	1	no
C18H7.4	WBGene00015994	chrIV:593333-595229	q1	q2	NOTEST	0.00363759	0	-1.79769e+308	-1.79769e+308	0.350037	1	no
C18H7.5	WBGene00015995	chrIV:586290-587712	q1	q2	NOTEST	0	0	0	0	1	1	no
C18H7.6	WBGene00015996	chrIV:589098-592446	q1	q2	NOTEST	0.0190215	0.0770276	2.01774	-1.28487	0.198838	1	no
C18H7.7	WBGene00015997	chrIV:595721-596441	q1	q2	NOTEST	0	0.0300821	1.79769e+308	1.79769e+308	0.285806	1	no
C18H7.9	WBGene00015999	chrIV:602990-603643	q1	q2	NOTEST	0	0.139895	1.79769e+308	1.79769e+308	0.162667	1	no
C18H9.1	WBGene00016000	chrII:6699131-6700448	q1	q2	OK	0.523685	0.658148	0.329712	-0.412083	0.680278	0.999993	no
C18H9.2	C18H9.2	chrII:6690017-6691807	q1	q2	OK	36.4278	32.7985	-0.151409	0.312792	0.754439	0.999993	no
C18H9.3	WBGene00016002	chrII:6684214-6688606	q1	q2	OK	37.9819	34.2153	-0.15067	0.503712	0.614464	0.999993	no
C18H9.5	WBGene00016003	chrII:6692724-6695271	q1	q2	OK	0.564277	0.59891	0.0859356	-0.118686	0.905524	0.999993	no
C18H9.6	WBGene00016004	chrII:6700554-6701591	q1	q2	OK	2.51574	3.08927	0.296283	-0.404476	0.685863	0.999993	no
C23F12.3	WBGene00016008	chrX:9391585-9394643	q1	q2	NOTEST	0.214288	0.200849	-0.0934427	0.068596	0.945311	1	no
C23F12.4	WBGene00016009	chrX:9387376-9389130	q1	q2	OK	36.3799	34.6673	-0.0695657	0.168076	0.866524	0.999993	no
C23G10.1	WBGene00016010	chrIII:6209231-6212832	q1	q2	NOTEST	0.218208	0.321182	0.557687	-0.414203	0.678725	1	no
C23G10.10	WBGene00016016	chrIII:6213059-6213871	q1	q2	OK	0.849479	1.01196	0.252498	-0.257157	0.797058	0.999993	no
C23G10.11	WBGene00016017	chrIII:6215112-6215490	q1	q2	OK	0.646926	0.561489	-0.204343	0.154092	0.877537	0.999993	no
C23G10.2	WBGene00016011	chrIII:6208157-6209088	q1	q2	OK	100.339	103.516	0.0449663	-0.103421	0.917629	0.999993	no
C23G10.5	WBGene00016012	chrIII:6191057-6192029	q1	q2	OK	5.73102	7.6821	0.422708	-0.72353	0.469354	0.999993	no
C23G10.7	WBGene00016014	chrIII:6195937-6198364	q1	q2	OK	54.0965	46.6311	-0.214243	0.608283	0.543	0.999993	no
C23G10.8	WBGene00016015	chrIII:6202571-6206151	q1	q2	OK	111.183	111.527	0.00445413	-0.0173793	0.986134	0.999993	no
C23H3.2	WBGene00016018	chrII:61312-64308	q1	q2	OK	2.82003	2.83918	0.00976357	-0.0121096	0.990338	0.999993	no
C23H3.3	WBGene00016019	chrII:57669-60040	q1	q2	OK	46.7616	52.1058	0.156119	-0.45488	0.649195	0.999993	no
C23H3.5	WBGene00016021	chrII:47579-50098	q1	q2	OK	62.1996	63.6393	0.0330124	-0.105264	0.916166	0.999993	no
C23H3.9	WBGene00016022	chrII:71681-77512	q1	q2	OK	11.1653	11.6853	0.0656782	-0.113429	0.909691	0.999993	no
C23H4.6	WBGene00007694	chrX:12235552-12240713	q1	q2	OK	9.34563	11.3405	0.279124	-0.745898	0.455729	0.999993	no
C23H4.8	WBGene00044132	chrX:12217174-12219244	q1	q2	OK	4.41611	6.27703	0.507307	-0.793814	0.427304	0.999993	no
C23H5.1	WBGene00016023	chrIV:2130997-2133025	q1	q2	OK	12.3123	14.7888	0.264397	-0.515491	0.60621	0.999993	no
C23H5.11	WBGene00044649	chrIV:2091928-2099809	q1	q2	NOTEST	0.190952	0.210068	0.13765	-0.14286	0.886401	1	no
C23H5.12	WBGene00077523	chrIV:2133480-2134708	q1	q2	NOTEST	0.0698482	0.119514	0.774879	-0.505878	0.612943	1	no
C23H5.7	WBGene00000487	chrIV:2104055-2111294	q1	q2	NOTEST	0.229694	0.227245	-0.0154665	0.0184567	0.985275	1	no
C23H5.8	WBGene00016027	chrIV:2111889-2113422	q1	q2	OK	2.43423	5.83032	1.26011	-1.36358	0.1727	0.999993	no
C24A1.2	WBGene00016029	chrIII:688733-715835	q1	q2	OK	4.31454	3.51342	-0.296334	0.370854	0.710746	0.999993	no
C24A1.3	WBGene00016030	chrIII:688733-715835	q1	q2	OK	3.40437	3.40906	0.00198476	-0.00291677	0.997673	0.999993	no
C24A11.1	WBGene00016040	chrI:5401810-5402893	q1	q2	OK	0.478576	0.510397	0.092872	-0.108587	0.91353	0.999993	no
C24A11.2	WBGene00016041	chrI:5372857-5384511	q1	q2	OK	1.01247	0.804821	-0.331141	0.0759054	0.939494	0.999993	no
C24A11.5	WBGene00016042	chrI:5384641-5385740	q1	q2	OK	0.289033	0.141186	-1.03364	0.515902	0.605923	0.999993	no
C24A11.6	WBGene00016043	chrI:5396271-5396506	q1	q2	NOTEST	0	0	0	0	1	1	no
C24A3.1	WBGene00016032	chrX:9001183-9005998	q1	q2	NOTEST	0.168284	0.168936	0.00558466	-0.00634084	0.994941	1	no
C24A3.2	WBGene00016033	chrX:8997423-8998839	q1	q2	OK	37.546	39.5688	0.0757038	-0.158765	0.873854	0.999993	no
C24A3.4	WBGene00016034	chrX:8992351-8994607	q1	q2	OK	11.147	13.0207	0.224148	-0.454693	0.64933	0.999993	no
C24A3.9	WBGene00044580	chrX:9009724-9010402	q1	q2	NOTEST	0	0	0	0	1	1	no
C24A8.1	WBGene00016037	chrX:4320838-4327307	q1	q2	OK	0.7897	0.855691	0.115786	-0.0867129	0.9309	0.999993	no
C24A8.5	WBGene00016039	chrX:4328375-4328892	q1	q2	OK	1.03192	1.24203	0.267367	-0.320132	0.748868	0.999993	no
C24A8.6	WBGene00044004	chrX:4330053-4332381	q1	q2	OK	7.75314	7.85546	0.0189146	-0.030938	0.975319	0.999993	no
C24B5.1	WBGene00016044	chrV:9191661-9197286	q1	q2	OK	1.54746	2.34593	0.600254	-0.527749	0.597674	0.999993	no
C24B5.4	WBGene00016046	chrV:9191661-9197286	q1	q2	OK	10.5768	9.80171	-0.109792	0.207772	0.835407	0.999993	no
C24B9.3	WBGene00016048	chrV:2698967-2711817	q1	q2	OK	9.2733	8.52027	-0.122184	0.108733	0.913414	0.999993	no
C24D10.1	WBGene00016053	chrIV:5166331-5168419	q1	q2	NOTEST	0.141	0.0880638	-0.67907	0.67281	0.501068	1	no
C24D10.2	WBGene00016054	chrIV:5163330-5164343	q1	q2	NOTEST	0.223144	0.0264875	-3.07459	1.06567	0.286574	1	no
C24D10.4	WBGene00016055	chrIV:5160514-5161327	q1	q2	OK	46.0263	36.0748	-0.351469	0.847523	0.396704	0.999993	no
C24D10.5	WBGene00016056	chrIV:5150250-5151024	q1	q2	OK	11.0976	12.0178	0.114914	-0.205779	0.836963	0.999993	no
C24D10.6	WBGene00016057	chrIV:5159477-5160239	q1	q2	OK	101.186	96.7018	-0.0653988	0.174725	0.861296	0.999993	no
C24D10.9	C24D10.9	chrIV:5152183-5152477	q1	q2	OK	2.74431	2.26839	-0.274773	0.308889	0.757406	0.999993	no
C24F3.2	WBGene00007697	chrIV:10222488-10223650	q1	q2	OK	9.10692	8.19543	-0.152143	0.283027	0.777156	0.999993	no
C24F3.4	WBGene00007698	chrIV:10214963-10219286	q1	q2	OK	39.4916	41.7621	0.0806506	-0.258147	0.796294	0.999993	no
C24G6.2	WBGene00016059	chrV:5523710-5530709	q1	q2	OK	9.9409	12.4017	0.319087	-0.661215	0.508474	0.999993	no
C24G6.3	WBGene00016060	chrV:5514331-5520435	q1	q2	OK	33.7666	33.2147	-0.0237753	0.0781553	0.937704	0.999993	no
C24G6.6	WBGene00016061	chrV:5505279-5513814	q1	q2	OK	9.77436	13.1678	0.429943	-0.644034	0.519553	0.999993	no
C24G6.8	WBGene00016062	chrV:5534224-5536227	q1	q2	OK	86.8312	83.0926	-0.0634943	0.213841	0.830671	0.999993	no
C24G7.1	WBGene00016063	chrI:4109408-4112387	q1	q2	NOTEST	0	0.0360845	1.79769e+308	1.79769e+308	0.103694	1	no
C24G7.2	WBGene00016064	chrI:4103714-4108047	q1	q2	NOTEST	0.0214918	0.0222141	0.0476845	-0.0265617	0.978809	1	no
C24G7.4	WBGene00016066	chrI:4094611-4098329	q1	q2	OK	1.3528	1.92406	0.508199	-0.828964	0.407125	0.999993	no
C24H10.1	WBGene00016067	chrX:5072005-5074200	q1	q2	OK	45.309	55.2787	0.286927	-0.720047	0.471496	0.999993	no
C24H10.2	WBGene00016068	chrX:5064612-5066264	q1	q2	OK	21.4096	20.4542	-0.0658572	0.150117	0.880672	0.999993	no
C24H10.3	WBGene00016069	chrX:5061022-5062174	q1	q2	OK	29.3349	30.7311	0.0670806	-0.135015	0.8926	0.999993	no
C24H10.4	WBGene00016070	chrX:5058351-5058702	q1	q2	OK	3.89147	3.86227	-0.0108653	0.0101497	0.991902	0.999993	no
C24H11.2	WBGene00007700	chrIII:11790435-11792145	q1	q2	OK	0.880887	0.886723	0.00952748	-0.0136346	0.989122	0.999993	no
C24H11.5	WBGene00007702	chrIII:11780134-11780926	q1	q2	OK	116.523	109.219	-0.0933913	0.127874	0.898248	0.999993	no
C24H12.1	WBGene00016071	chrII:441497-446928	q1	q2	OK	52.3131	61.5209	0.233904	-0.761033	0.446638	0.999993	no
C24H12.10	C24H12.10	chrII:426484-427019	q1	q2	OK	7.03092	7.3205	0.0582288	-0.0883288	0.929615	0.999993	no
C24H12.11	WBGene00016080	chrII:427602-429152	q1	q2	OK	21.4905	22.1222	0.0417923	-0.0954405	0.923965	0.999993	no
C24H12.12	WBGene00044639	chrII:433658-435406	q1	q2	OK	7.92925	12.6519	0.674102	-1.09123	0.275171	0.999993	no
C24H12.2	WBGene00016072	chrII:436866-438727	q1	q2	OK	8.93492	11.1523	0.319813	-0.509356	0.610503	0.999993	no
C24H12.5	WBGene00016074	chrII:406140-410928	q1	q2	OK	27.889	25.3825	-0.135861	0.34226	0.732155	0.999993	no
C24H12.6	WBGene00016075	chrII:417348-418882	q1	q2	OK	0.718262	0.977044	0.443913	-0.585241	0.558386	0.999993	no
C24H12.7	WBGene00016076	chrII:420055-421141	q1	q2	OK	26.3312	28.5923	0.118851	-0.212535	0.83169	0.999993	no
C24H12.8	WBGene00016077	chrII:422318-423142	q1	q2	OK	10.5538	9.55605	-0.143273	0.24668	0.805156	0.999993	no
C25A1.1	WBGene00007705	chrI:10162378-10165116	q1	q2	OK	58.5794	48.7832	-0.264009	0.736835	0.461223	0.999993	no
C25A1.12	WBGene00007711	chrI:10191298-10192884	q1	q2	OK	65.6886	67.1608	0.031976	-0.101486	0.919165	0.999993	no
C25A1.13	WBGene00007712	chrI:10193231-10193896	q1	q2	OK	40.9774	36.9141	-0.150655	0.33297	0.739157	0.999993	no
C25A1.15	WBGene00007713	chrI:10197310-10197586	q1	q2	OK	1.22455	0.36795	-1.73468	0.991696	0.321346	0.999993	no
C25A1.16	WBGene00077526	chrI:10178993-10179731	q1	q2	LOWDATA	85.532	67.6024	-0.339391	0	1	1	no
C25A1.4	WBGene00007706	chrI:10169628-10173205	q1	q2	OK	72.8012	65.5842	-0.150612	0.534675	0.592875	0.999993	no
C25A1.5	WBGene00007707	chrI:10177170-10178911	q1	q2	OK	87.7508	78.9645	-0.152209	0.496859	0.619289	0.999993	no
C25A1.6	WBGene00007708	chrI:10178993-10179731	q1	q2	OK	215.04	184.34	-0.22224	0.610874	0.541283	0.999993	no
C25A11.1	WBGene00016086	chrX:9119717-9121595	q1	q2	OK	1.38382	1.57686	0.188403	-0.254096	0.799421	0.999993	no
C25A11.2	WBGene00016087	chrX:9114311-9116820	q1	q2	OK	16.4526	14.1384	-0.218702	0.569883	0.568757	0.999993	no
C25A6.1	WBGene00016081	chrV:5408511-5410055	q1	q2	NOTEST	0.184839	0.321852	0.800128	-0.852786	0.393778	1	no
C25A8.1	WBGene00016082	chrIV:7011123-7011237	q1	q2	NOTEST	0	0	0	0	1	1	no
C25A8.2	WBGene00016083	chrIV:7009829-7010733	q1	q2	NOTEST	0	0.0318209	1.79769e+308	1.79769e+308	0.296723	1	no
C25A8.4	WBGene00016084	chrIV:7003613-7009251	q1	q2	NOTEST	0.0194044	0.0638874	1.71915	-1.46422	0.143134	1	no
C25A8.5	WBGene00016085	chrIV:6999587-7001482	q1	q2	OK	0.454184	0.495376	0.125249	-0.16779	0.866748	0.999993	no
C25B8.5	WBGene00016089	chrX:6631889-6634998	q1	q2	OK	2.5386	2.69209	0.0846969	-0.133259	0.893989	0.999993	no
C25B8.7	WBGene00016090	chrX:6628003-6631500	q1	q2	OK	0.288699	0.273993	-0.0754308	0.090218	0.928114	0.999993	no
C25B8.8	WBGene00044297	chrX:6610016-6615306	q1	q2	OK	1.99605	2.24491	0.169507	-0.261475	0.793726	0.999993	no
C25D7.1	WBGene00007714	chrV:15036283-15036811	q1	q2	NOTEST	0.0718955	0.161841	1.1706	-0.542703	0.587334	1	no
C25D7.10	WBGene00007720	chrV:15067447-15068543	q1	q2	OK	18.5006	15.6581	-0.240659	0.491159	0.623314	0.999993	no
C25D7.12	WBGene00007721	chrV:15032152-15033334	q1	q2	OK	0.369027	0.76648	1.05452	-1.34474	0.17871	0.999993	no
C25D7.15	WBGene00007722	chrV:15060288-15061513	q1	q2	OK	1.57134	1.18659	-0.405179	0.532954	0.594066	0.999993	no
C25D7.16	WBGene00050940	chrV:15056271-15059582	q1	q2	OK	3.94481	3.35976	-0.231599	0.0345972	0.972401	0.999993	no
C25D7.5	WBGene00007717	chrV:15053747-15056262	q1	q2	OK	0.848232	0.92352	0.122684	-0.159632	0.873171	0.999993	no
C25D7.9	WBGene00007719	chrV:15065117-15065300	q1	q2	OK	1.11629	0.456559	-1.28983	0.411442	0.680749	0.999993	no
C25E10.10	WBGene00016099	chrV:9055453-9056331	q1	q2	OK	0.441545	0.386302	-0.19283	0.176897	0.859589	0.999993	no
C25E10.11	WBGene00016100	chrV:9057626-9058310	q1	q2	OK	0.482461	0.702682	0.54246	-0.399146	0.689785	0.999993	no
C25E10.12	WBGene00016101	chrV:9060471-9062418	q1	q2	OK	8.37383	9.04658	0.111484	-0.213091	0.831256	0.999993	no
C25E10.13	WBGene00023431	chrV:9059727-9060459	q1	q2	OK	2.05856	1.30365	-0.659073	0.608999	0.542525	0.999993	no
C25E10.4	WBGene00016094	chrV:9033570-9035582	q1	q2	NOTEST	0.0429341	0.108996	1.34408	-1.11153	0.26634	1	no
C25E10.5	WBGene00016095	chrV:9030525-9032554	q1	q2	OK	0.521351	0.619257	0.248284	-0.326232	0.744249	0.999993	no
C25E10.7	WBGene00016096	chrV:9050103-9050957	q1	q2	NOTEST	0.0175343	0	-1.79769e+308	-1.79769e+308	0.350037	1	no
C25E10.8	WBGene00016097	chrV:9053302-9053973	q1	q2	OK	0.417541	0.398965	-0.0656552	0.0622106	0.950395	0.999993	no
C25F6.1	WBGene00016102	chrX:5486463-5488067	q1	q2	OK	41.8482	41.7843	-0.00220202	0.00577483	0.995392	0.999993	no
C25F6.6	WBGene00016105	chrX:5450229-5450791	q1	q2	OK	1.81815	1.94188	0.0949828	-0.114403	0.908918	0.999993	no
C25F6.7	WBGene00016106	chrX:5445036-5448036	q1	q2	OK	23.5174	25.5013	0.116843	-0.232748	0.815957	0.999993	no
C25F6.8	WBGene00044569	chrX:5448284-5449936	q1	q2	OK	0.346659	0.514314	0.569132	-0.490115	0.624052	0.999993	no
C25F9.10	WBGene00044291	chrV:19405696-19406365	q1	q2	OK	6.82275	7.51251	0.138942	-0.20834	0.834963	0.999993	no
C25F9.11	WBGene00045411	chrV:19432415-19433030	q1	q2	OK	1.15666	1.61259	0.479414	-0.590505	0.554852	0.999993	no
C25F9.12	WBGene00045412	chrV:19402451-19402920	q1	q2	OK	1.73535	2.59674	0.581476	-0.705678	0.480388	0.999993	no
C25F9.13	WBGene00045413	chrV:19397798-19398953	q1	q2	NOTEST	0	0	0	0	1	1	no
C25F9.14	WBGene00045461	chrV:19436544-19437001	q1	q2	OK	5.09365	6.06286	0.251299	-0.337376	0.735833	0.999993	no
C25F9.15	WBGene00050967	chrV:19418182-19418882	q1	q2	OK	0.320835	0.532576	0.731157	-0.5784	0.562994	0.999993	no
C25F9.2	WBGene00007723	chrV:19421441-19426745	q1	q2	NOTEST	0.240241	0.257817	0.101869	-0.146676	0.883388	1	no
C25F9.4	WBGene00007724	chrV:19411323-19413852	q1	q2	NOTEST	0.260689	0.315532	0.275457	-0.339203	0.734457	1	no
C25F9.5	WBGene00007725	chrV:19407709-19410811	q1	q2	OK	2.04879	2.81269	0.45718	-0.757102	0.448989	0.999993	no
C25F9.6	WBGene00007726	chrV:19403500-19405295	q1	q2	OK	2.90105	2.67706	-0.115929	0.161761	0.871494	0.999993	no
C25F9.8	WBGene00007727	chrV:19395025-19396580	q1	q2	NOTEST	0	0	0	0	1	1	no
C25F9.9	WBGene00007728	chrV:19416603-19417865	q1	q2	OK	0.372821	0.484166	0.377018	-0.382418	0.702151	0.999993	no
C25G4.11	C25G4.11	chrIV:12468646-12470216	q1	q2	OK	120.789	129.734	0.103066	-0.346829	0.72872	0.999993	no
C25G4.2	WBGene00007730	chrIV:12443212-12444012	q1	q2	OK	85.4573	104.399	0.288835	-0.82952	0.40681	0.999993	no
C25G4.3	WBGene00007731	chrIV:12444426-12445861	q1	q2	OK	44.1055	46.8077	0.0857892	-0.216619	0.828505	0.999993	no
C25G4.6	WBGene00007733	chrIV:12455093-12456152	q1	q2	OK	0.954818	3.02483	1.66356	-2.38489	0.0170843	0.999993	no
C25G4.7	WBGene00007734	chrIV:12456936-12458538	q1	q2	OK	0.473509	0.878154	0.891082	-1.14855	0.25074	0.999993	no
C25G4.8	WBGene00007735	chrIV:12459795-12463389	q1	q2	NOTEST	0.0913482	0.0342795	-1.41403	0.841408	0.400119	1	no
C25G6.1	WBGene00016107	chrX:1269728-1272556	q1	q2	OK	0.946974	0.435583	-1.12038	1.12064	0.262441	0.999993	no
C25G6.4	WBGene00016109	chrX:1247827-1249833	q1	q2	OK	0.735525	0.511789	-0.523225	0.587176	0.557085	0.999993	no
C25G6.5	WBGene00016110	chrX:1251019-1255610	q1	q2	OK	7.11531	7.89251	0.149558	-0.294808	0.76814	0.999993	no
C25H3.1	WBGene00016111	chrII:5699813-5701389	q1	q2	NOTEST	0.11281	0.0321458	-1.8112	1.09022	0.275614	1	no
C25H3.10	WBGene00016119	chrII:5696605-5698938	q1	q2	NOTEST	0.244789	0.245365	0.00339196	-0.00345243	0.997245	1	no
C25H3.11	WBGene00016120	chrII:5684460-5689012	q1	q2	OK	30.8826	34.3142	0.152013	-0.498296	0.618275	0.999993	no
C25H3.12	WBGene00016121	chrII:5659918-5660768	q1	q2	OK	40.5393	53.0818	0.388896	-0.90508	0.365423	0.999993	no
C25H3.14	WBGene00016123	chrII:5695364-5696337	q1	q2	OK	35.7035	33.1614	-0.106558	0.225436	0.82164	0.999993	no
C25H3.15	WBGene00044391	chrII:5665389-5666184	q1	q2	OK	3.12867	2.96172	-0.0791134	0.0975615	0.922281	0.999993	no
C25H3.16	WBGene00044392	chrII:5666272-5668912	q1	q2	OK	4.38907	5.26489	0.262488	-0.110979	0.911633	0.999993	no
C25H3.3	WBGene00016112	chrII:5694174-5694721	q1	q2	OK	62.0289	54.3529	-0.190584	0.423752	0.671747	0.999993	no
C25H3.4	WBGene00016113	chrII:5691702-5693905	q1	q2	OK	32.6716	31.4049	-0.0570479	0.163604	0.870043	0.999993	no
C25H3.6	WBGene00016115	chrII:5661148-5665225	q1	q2	OK	102.174	93.0718	-0.134618	0.229022	0.818852	0.999993	no
C25H3.7	WBGene00016116	chrII:5666272-5668912	q1	q2	OK	96.8365	100.333	0.0511729	-0.141273	0.887654	0.999993	no
C25H3.8	WBGene00016117	chrII:5669757-5678223	q1	q2	OK	27.1652	28.3753	0.0628778	-0.232403	0.816225	0.999993	no
C25H3.9	WBGene00016118	chrII:5690115-5691335	q1	q2	OK	191.04	177.728	-0.104206	0.355565	0.722166	0.999993	no
C26B2.2	WBGene00016125	chrIV:8021191-8021982	q1	q2	OK	0.34463	0.403156	0.22629	-0.234525	0.814577	0.999993	no
C26B2.5	C26B2.5	chrIV:8040285-8041503	q1	q2	OK	0.403368	0.515537	0.353981	-0.0908181	0.927637	0.999993	no
C26B2.7	WBGene00016129	chrIV:8016199-8016867	q1	q2	OK	50.7492	49.9313	-0.0234381	0.0537165	0.957161	0.999993	no
C26B2.8	WBGene00016130	chrIV:8014114-8015624	q1	q2	OK	3.31004	3.75121	0.180507	-0.293767	0.768936	0.999993	no
C26B9.1	WBGene00016131	chrX:5344554-5348684	q1	q2	OK	9.72382	8.11212	-0.261445	0.460692	0.64502	0.999993	no
C26B9.2	WBGene00016132	chrX:5340306-5341977	q1	q2	OK	1.79014	1.4428	-0.311194	0.435751	0.663017	0.999993	no
C26B9.3	WBGene00016133	chrX:5338240-5340149	q1	q2	OK	39.3364	43.5815	0.14785	-0.386536	0.6991	0.999993	no
C26B9.5	WBGene00016134	chrX:5329422-5332305	q1	q2	OK	6.38859	6.91252	0.113715	-0.220083	0.825806	0.999993	no
C26B9.6	WBGene00016135	chrX:5333044-5335399	q1	q2	OK	21.1992	22.0749	0.058399	-0.130349	0.89629	0.999993	no
C26B9.7	WBGene00016136	chrX:5342303-5342799	q1	q2	OK	11.4957	15.2828	0.410808	-0.601588	0.547448	0.999993	no
C26C6.10	WBGene00077553	chrI:7512913-7513722	q1	q2	OK	1.5493	2.48919	0.684054	-0.816817	0.414033	0.999993	no
C26C6.4	WBGene00007739	chrI:7532310-7535993	q1	q2	OK	0.745274	0.854319	0.197004	-0.179503	0.857543	0.999993	no
C26C6.6	WBGene00007740	chrI:7505967-7506642	q1	q2	OK	0.711449	0.734659	0.0463147	-0.0438717	0.965007	0.999993	no
C26C6.8	WBGene00007742	chrI:7495432-7505576	q1	q2	OK	0.366772	0.639134	0.801233	-0.0527899	0.957899	0.999993	no
C26C6.9	WBGene00007743	chrI:7514120-7515104	q1	q2	OK	10.153	12.3211	0.279227	-0.495449	0.620284	0.999993	no
C26D10.4	WBGene00007745	chrII:8329707-8333416	q1	q2	OK	4.36531	5.82902	0.417169	-0.857457	0.391192	0.999993	no
C26D10.6	WBGene00007746	chrII:8346639-8354652	q1	q2	OK	3.9231	4.3968	0.16446	-0.212084	0.832041	0.999993	no
C26D10.7	WBGene00023420	chrII:8334043-8336453	q1	q2	OK	0.803844	0.948863	0.239283	-0.35463	0.722867	0.999993	no
C26E1.1	WBGene00007747	chrV:13297506-13298037	q1	q2	NOTEST	0.148515	0.13421	-0.146118	0.0738839	0.941103	1	no
C26E1.2	WBGene00007748	chrV:13305154-13307191	q1	q2	NOTEST	0.154994	0.282643	0.866768	-0.988837	0.322743	1	no
C26E1.3	WBGene00007749	chrV:13301638-13304734	q1	q2	OK	0.302685	0.376409	0.314482	-0.407477	0.683658	0.999993	no
C26E6.1	WBGene00016137	chrIII:4956852-4957501	q1	q2	OK	0.392273	0.321644	-0.286393	0.273535	0.784442	0.999993	no
C26E6.12	WBGene00016145	chrIII:4930563-4932153	q1	q2	OK	36.1486	36.1582	0.000383448	-0.0010547	0.999158	0.999993	no
C26E6.3	WBGene00016139	chrIII:4944475-4947269	q1	q2	OK	16.3855	15.8022	-0.0522896	0.133271	0.893979	0.999993	no
C26E6.6	WBGene00016142	chrIII:4935541-4937169	q1	q2	OK	68.4939	77.2866	0.174243	-0.568193	0.569904	0.999993	no
C26E6.7	WBGene00016143	chrIII:4932440-4934882	q1	q2	OK	33.9012	27.6801	-0.292488	0.863058	0.388106	0.999993	no
C26F1.1	WBGene00016146	chrV:7731614-8316095	q1	q2	OK	76.9175	68.7305	-0.162361	0.012954	0.989665	0.999993	no
C26F1.3	WBGene00016148	chrV:7731614-8316095	q1	q2	OK	94.479	86.2557	-0.131374	0.049021	0.960903	0.999993	no
C26F1.6	WBGene00016149	chrV:7731614-8316095	q1	q2	OK	0.671503	1.01951	0.60241	-0.0293256	0.976605	0.999993	no
C26G2.2	WBGene00007751	chrX:14665314-14671231	q1	q2	OK	1.40052	1.74755	0.31937	-0.519436	0.603457	0.999993	no
C26H9A.2	WBGene00007752	chrIV:12653465-12674749	q1	q2	OK	27.2167	31.6232	0.216489	-0.842768	0.399358	0.999993	no
C27A12.2	WBGene00016154	chrI:6041671-6046011	q1	q2	OK	62.7657	63.8547	0.0248162	-0.0850086	0.932255	0.999993	no
C27A12.4	WBGene00016155	chrI:6036598-6037483	q1	q2	OK	0.88218	1.16736	0.404106	-0.569142	0.56926	0.999993	no
C27A12.6	WBGene00016156	chrI:6053343-6055823	q1	q2	OK	76.2414	79.1306	0.0536615	-0.19134	0.848259	0.999993	no
C27A12.7	WBGene00016157	chrI:6055948-6058426	q1	q2	OK	107.471	118.415	0.139901	-0.453123	0.65046	0.999993	no
C27A12.9	WBGene00016159	chrI:6061781-6068034	q1	q2	OK	18.7429	17.982	-0.0597921	0.142085	0.887013	0.999993	no
C27A2.1	WBGene00016151	chrII:5062128-5067092	q1	q2	OK	81.0033	85.1144	0.0714228	-0.272678	0.785101	0.999993	no
C27A2.4	WBGene00016152	chrII:5056219-5060704	q1	q2	OK	1.45118	1.79662	0.308063	-0.5023	0.615456	0.999993	no
C27A2.5	WBGene00016153	chrII:5068726-5069615	q1	q2	OK	1.53181	2.03325	0.408552	-0.493141	0.621913	0.999993	no
C27A2.7	WBGene00044386	chrII:5069849-5071357	q1	q2	OK	0.583633	0.39414	-0.566351	0.550947	0.58167	0.999993	no
C27A2.8	WBGene00044387	chrII:5067142-5067968	q1	q2	OK	5.41465	5.64698	0.0606111	-0.0888987	0.929162	0.999993	no
C27A7.1	WBGene00007753	chrV:12131440-12137366	q1	q2	OK	6.6695	7.85991	0.236933	-0.422879	0.672383	0.999993	no
C27A7.2	WBGene00007754	chrV:12138231-12140259	q1	q2	OK	2.38027	3.254	0.451091	-0.71285	0.475939	0.999993	no
C27A7.3	WBGene00007755	chrV:12140856-12144219	q1	q2	OK	0.59783	0.69112	0.209202	-0.245856	0.805794	0.999993	no
C27A7.6	WBGene00007757	chrV:12125132-12127318	q1	q2	OK	6.88235	6.42893	-0.0983231	0.190612	0.84883	0.999993	no
C27A7.8	WBGene00007758	chrV:12153056-12154227	q1	q2	OK	1.24106	0.909165	-0.448964	0.306526	0.759204	0.999993	no
C27A7.9	WBGene00007759	chrV:12154243-12154635	q1	q2	NOTEST	0.127651	0	-1.79769e+308	-1.79769e+308	0.260419	1	no
C27B7.2	WBGene00007760	chrIV:8892844-8893725	q1	q2	OK	54.269	53.6013	-0.0178609	0.0451448	0.963992	0.999993	no
C27B7.5	WBGene00007762	chrIV:8901631-8903159	q1	q2	OK	52.3298	53.5015	0.0319457	-0.0975073	0.922324	0.999993	no
C27B7.6	WBGene00007763	chrIV:8903208-8906141	q1	q2	NOTEST	0.0834079	0.196657	1.23742	-1.14411	0.252577	1	no
C27B7.7	WBGene00007764	chrIV:8907035-8915370	q1	q2	OK	4.8771	5.58004	0.194252	-0.464932	0.64198	0.999993	no
C27B7.9	WBGene00007765	chrIV:8915456-8916097	q1	q2	OK	0.710786	0.685035	-0.0532372	0.0525138	0.958119	0.999993	no
C27C12.1	WBGene00007771	chrX:14849246-14853685	q1	q2	OK	16.5518	14.6165	-0.179386	0.380943	0.703245	0.999993	no
C27C12.3	WBGene00007773	chrX:14863608-14865775	q1	q2	OK	1.84472	1.22424	-0.591523	0.946465	0.343911	0.999993	no
C27C12.4	WBGene00007774	chrX:14854061-14856449	q1	q2	OK	33.2184	34.8476	0.0690765	-0.1943	0.845941	0.999993	no
C27C7.2	WBGene00007767	chrI:10954061-11481796	q1	q2	LOWDATA	0	0	0	0	1	1	no
C27C7.5	WBGene00007768	chrI:10954061-11481796	q1	q2	NOTEST	0	0	0	0	1	1	no
C27C7.7	WBGene00007769	chrI:10954061-11481796	q1	q2	OK	6.76987	6.15099	-0.138308	0.0226654	0.981917	0.999993	no
C27D6.1	WBGene00016160	chrII:5171899-5177982	q1	q2	OK	0.542207	0.503254	-0.107556	0.13938	0.88915	0.999993	no
C27D6.11	WBGene00044388	chrII:5159772-5161120	q1	q2	NOTEST	0.0153677	0.0465607	1.59921	-0.627211	0.530521	1	no
C27D6.12	WBGene00044389	chrII:5171899-5177982	q1	q2	OK	21.1293	23.7847	0.17079	-0.0526363	0.958022	0.999993	no
C27D6.3	WBGene00016161	chrII:5171899-5177982	q1	q2	NOTEST	0.0828349	0	-1.79769e+308	-1.79769e+308	0.401015	1	no
C27D6.4	WBGene00016162	chrII:5179028-5187561	q1	q2	OK	106.065	102.779	-0.0453957	0.115496	0.908052	0.999993	no
C27D8.1	WBGene00007777	chrIV:12717859-12719353	q1	q2	NOTEST	0.164881	0.222574	0.432865	-0.451031	0.651967	1	no
C27D8.2	WBGene00007778	chrIV:12712764-12714732	q1	q2	OK	2.91654	3.29481	0.175939	-0.302861	0.761996	0.999993	no
C27D8.3	WBGene00007779	chrIV:12704102-12712291	q1	q2	OK	6.74114	6.86456	0.0261747	-0.0577097	0.95398	0.999993	no
C27D8.4	WBGene00007780	chrIV:12704102-12712291	q1	q2	OK	33.023	30.2295	-0.127515	0.279202	0.78009	0.999993	no
C27D9.1	WBGene00016163	chrII:4753451-4756780	q1	q2	OK	4.76565	3.14661	-0.598877	1.11024	0.266897	0.999993	no
C27D9.2	WBGene00016164	chrII:4753451-4756780	q1	q2	NOTEST	0.0279366	0.0228521	-0.289832	0.0205273	0.983623	1	no
C27F2.1	WBGene00016165	chrIII:4987232-4991360	q1	q2	OK	4.04576	4.81662	0.251611	-0.48162	0.630076	0.999993	no
C27F2.10	WBGene00016171	chrIII:4984986-4986896	q1	q2	OK	74.1631	75.679	0.0291931	-0.0954624	0.923948	0.999993	no
C27F2.5	WBGene00016167	chrIII:4960386-4963055	q1	q2	OK	64.0313	61.8025	-0.0511124	0.161702	0.871541	0.999993	no
C27F2.6	WBGene00016168	chrIII:4979759-4980382	q1	q2	OK	0.354327	0.320173	-0.146229	0.119852	0.904601	0.999993	no
C27F2.7	WBGene00016169	chrIII:4980607-4984439	q1	q2	OK	7.35162	7.42439	0.0142109	-0.0274227	0.978123	0.999993	no
C27F2.8	WBGene00016170	chrIII:4991408-4998126	q1	q2	OK	52.5783	48.3264	-0.121656	0.468103	0.639711	0.999993	no
C27F2.9	WBGene00043156	chrIII:4960386-4963055	q1	q2	OK	16.0364	16.3004	0.0235606	-0.0257309	0.979472	0.999993	no
C27H2.2	C27H2.2	chrIV:13952564-13963975	q1	q2	OK	30.2903	30.5938	0.0143825	-0.0435955	0.965227	0.999993	no
C27H2.5	C27H2.5	chrIV:13938442-13944445	q1	q2	OK	3.09502	3.01021	-0.0400857	0.0532857	0.957504	0.999993	no
C27H5.2	WBGene00016172	chrII:7155589-7160897	q1	q2	OK	8.3362	10.3419	0.311042	-0.560775	0.574951	0.999993	no
C27H5.3	WBGene00016173	chrII:7152524-7155433	q1	q2	OK	86.973	81.8507	-0.0875735	0.312413	0.754726	0.999993	no
C27H5.4	WBGene00016174	chrII:7162489-7165796	q1	q2	OK	1.95409	2.6787	0.455035	-0.706902	0.479627	0.999993	no
C27H5.6	WBGene00016175	chrII:7185325-7187169	q1	q2	OK	0.338507	0.152527	-1.15012	1.12664	0.259894	0.999993	no
C27H6.3	WBGene00007785	chrV:9981260-9982740	q1	q2	OK	39.4331	36.3962	-0.115618	0.323585	0.746252	0.999993	no
C27H6.8	WBGene00007787	chrV:9986396-9987766	q1	q2	OK	115.27	119.76	0.0551241	-0.188542	0.850452	0.999993	no
C27H6.9	WBGene00077500	chrV:9982855-9983861	q1	q2	OK	24.2905	18.7033	-0.377095	0.82792	0.407716	0.999993	no
C28A5.1	WBGene00007788	chrIII:4429589-4434316	q1	q2	OK	18.5333	15.2204	-0.284119	0.856632	0.391648	0.999993	no
C28A5.2	WBGene00007789	chrIII:4434721-4439515	q1	q2	OK	17.5371	14.5569	-0.268701	0.804623	0.421037	0.999993	no
C28A5.5	C28A5.5	chrIII:4450905-4452117	q1	q2	OK	0.75579	0.458842	-0.719986	0.674675	0.499883	0.999993	no
C28A5.6	WBGene00007791	chrIII:4423750-4429471	q1	q2	OK	0.863377	1.11434	0.368126	-0.596997	0.550509	0.999993	no
C28C12.1	WBGene00016177	chrIV:8501468-8502925	q1	q2	OK	0.935778	2.5632	1.45371	-2.02986	0.0423704	0.999993	no
C28C12.11	WBGene00016181	chrIV:8474085-8475265	q1	q2	NOTEST	0.175859	0.253409	0.52705	-0.442683	0.657995	1	no
C28C12.12	WBGene00016182	chrIV:8494548-8496352	q1	q2	OK	55.5161	51.0875	-0.119936	0.354737	0.722787	0.999993	no
C28C12.2	WBGene00016178	chrIV:8499305-8500068	q1	q2	OK	25.9486	24.95	-0.0566186	0.123584	0.901644	0.999993	no
C28C12.3	WBGene00016179	chrIV:8490207-8490844	q1	q2	NOTEST	0	0.0242803	1.79769e+308	1.79769e+308	0.296723	1	no
C28C12.4	WBGene00016180	chrIV:8487483-8488321	q1	q2	OK	0.37272	0.382081	0.0357864	-0.0354002	0.971761	0.999993	no
C28D4.10	WBGene00007796	chrIV:9738490-9739201	q1	q2	OK	0.945505	1.13304	0.26104	-0.282952	0.777214	0.999993	no
C28D4.4	WBGene00007792	chrIV:9743745-9744984	q1	q2	NOTEST	0.0379523	0.0310449	-0.289832	0.142835	0.88642	1	no
C28D4.5	WBGene00007793	chrIV:9745535-9746788	q1	q2	NOTEST	0.028434	0.0114538	-1.31179	0.444256	0.656857	1	no
C28D4.7	WBGene00007794	chrIV:9741860-9743128	q1	q2	NOTEST	0.0178589	0.119992	2.74823	-1.30826	0.190786	1	no
C28D4.8	WBGene00007795	chrIV:9747208-9748403	q1	q2	NOTEST	0.0132848	0.0301213	1.18101	-0.418853	0.675323	1	no
C28F5.1	WBGene00016183	chrII:7506176-7506550	q1	q2	NOTEST	0	0	0	0	1	1	no
C28G1.2	WBGene00016187	chrX:8836590-8837608	q1	q2	OK	0.434347	0.526271	0.276957	-0.327509	0.743283	0.999993	no
C28G1.4	WBGene00016189	chrX:8849083-8853568	q1	q2	OK	26.2026	29.5012	0.171065	-0.558479	0.576517	0.999993	no
C28G1.5	WBGene00016190	chrX:8826578-8828479	q1	q2	OK	4.14151	4.22784	0.0297634	-0.043041	0.965669	0.999993	no
C28G1.6	WBGene00016191	chrX:8829879-8831141	q1	q2	OK	1.42142	1.5812	0.153691	-0.220311	0.825629	0.999993	no
C28H8.1	WBGene00016192	chrIII:5926040-5932908	q1	q2	OK	263.772	284.86	0.110963	-0.374048	0.708368	0.999993	no
C28H8.11	WBGene00016201	chrIII:5917582-5920041	q1	q2	OK	19.4582	21.5721	0.148794	-0.292969	0.769546	0.999993	no
C28H8.2	WBGene00016193	chrIII:5923141-5925709	q1	q2	OK	1.11582	1.34586	0.270418	-0.0632592	0.94956	0.999993	no
C28H8.3	WBGene00016194	chrIII:5908652-5914687	q1	q2	OK	67.7356	68.5636	0.0175285	-0.0690916	0.944917	0.999993	no
C28H8.4	WBGene00016195	chrIII:5907003-5908378	q1	q2	OK	31.9469	21.2208	-0.590196	1.37089	0.17041	0.999993	no
C28H8.5	WBGene00016196	chrIII:5884261-5885730	q1	q2	OK	0.488839	0.507853	0.0550537	-0.0453727	0.96381	0.999993	no
C28H8.7	WBGene00016198	chrIII:5885801-5886911	q1	q2	OK	0.299155	0.412271	0.462701	-0.511585	0.608942	0.999993	no
C28H8.8	WBGene00016199	chrIII:5887058-5888730	q1	q2	OK	0.84831	0.588463	-0.527639	0.701393	0.483058	0.999993	no
C28H8.9	WBGene00016200	chrIII:5903526-5906077	q1	q2	OK	79.5614	74.362	-0.097503	0.249337	0.8031	0.999993	no
C29A12.1	WBGene00007797	chrV:10812387-10813374	q1	q2	OK	34.0815	26.9844	-0.336864	0.781641	0.434426	0.999993	no
C29A12.6	WBGene00007800	chrV:10847172-10852482	q1	q2	OK	9.75518	10.4385	0.0976677	-0.220483	0.825495	0.999993	no
C29A12.7	C29A12.7	chrV:10825003-10846664	q1	q2	OK	0.607195	0.526748	-0.205047	0.0461515	0.96319	0.999993	no
C29E4.10	WBGene00016207	chrIII:7937791-7940866	q1	q2	OK	0.181455	0.437635	1.27012	-1.65525	0.0978747	0.999993	no
C29E4.12	WBGene00016209	chrIII:7940994-7941548	q1	q2	OK	124.975	125.24	0.00305609	-0.00831879	0.993363	0.999993	no
C29E4.13	WBGene00043051	chrIII:7926935-7928669	q1	q2	OK	10.9366	8.97966	-0.284426	0.497704	0.618693	0.999993	no
C29E4.14	WBGene00044634	chrIII:7917922-7924802	q1	q2	OK	1.26348	1.04425	-0.274937	0.0571105	0.954457	0.999993	no
C29E4.15	WBGene00045246	chrIII:7952591-7955751	q1	q2	OK	28.0478	28.1222	0.00382041	-0.00819807	0.993459	0.999993	no
C29F3.3	WBGene00007804	chrV:15346706-15347371	q1	q2	NOTEST	0.209467	0.146997	-0.510937	0.264704	0.791237	1	no
C29F3.7	WBGene00007807	chrV:15354815-15357555	q1	q2	OK	8.45791	6.34497	-0.414687	0.632952	0.526765	0.999993	no
C29F4.2	WBGene00007808	chrIV:11226566-11230227	q1	q2	OK	0.41737	0.670331	0.683548	-0.819059	0.412753	0.999993	no
C29F4.3	WBGene00007809	chrIV:11222025-11223914	q1	q2	NOTEST	0.176619	0.222215	0.331316	-0.349181	0.726954	1	no
C29F5.1	WBGene00016210	chrII:6303480-6306247	q1	q2	OK	39.3047	47.8443	0.283646	-0.779101	0.43592	0.999993	no
C29F5.3	WBGene00016212	chrII:6290620-6291625	q1	q2	NOTEST	0.140634	0.283956	1.01372	-0.933389	0.350619	1	no
C29F5.5	WBGene00016213	chrII:6297211-6298644	q1	q2	NOTEST	0	0	0	0	1	1	no
C29F5.8	WBGene00044589	chrII:6306397-6308042	q1	q2	NOTEST	0.00911806	0.069791	2.93624	-0.729651	0.465603	1	no
C29F7.1	WBGene00007810	chrX:13412559-13414474	q1	q2	OK	3.54566	6.24342	0.816281	-1.38086	0.167321	0.999993	no
C29F7.2	WBGene00007811	chrX:13416009-13418147	q1	q2	OK	77.4643	76.9028	-0.0104955	0.0341663	0.972745	0.999993	no
C29F7.3	WBGene00007812	chrX:13418794-13419836	q1	q2	OK	74.6789	73.3743	-0.025426	0.0712517	0.943197	0.999993	no
C29F7.6	WBGene00007813	chrX:13436385-13441815	q1	q2	OK	107.743	125.589	0.221116	-0.861264	0.389092	0.999993	no
C29F7.7	C29F7.7	chrX:13442100-13442353	q1	q2	NOTEST	0	0	0	0	1	1	no
C29F9.1	WBGene00016216	chrIII:132423-134369	q1	q2	OK	12.2916	12.4515	0.0186492	-0.0366101	0.970796	0.999993	no
C29F9.12	WBGene00016226	chrIII:120490-124640	q1	q2	OK	115.354	87.7725	-0.394231	0.492407	0.622432	0.999993	no
C29F9.2	WBGene00016217	chrIII:130945-131753	q1	q2	OK	9.7677	11.9442	0.290218	-0.457347	0.647421	0.999993	no
C29F9.3	WBGene00016218	chrIII:124776-126462	q1	q2	OK	2.31312	2.50009	0.112142	-0.132999	0.894194	0.999993	no
C29F9.4	WBGene00016219	chrIII:120490-124640	q1	q2	OK	3.83819	3.89746	0.0221074	-0.0286639	0.977133	0.999993	no
C29F9.5	WBGene00016220	chrIII:117705-118766	q1	q2	NOTEST	0.0410995	0	-1.79769e+308	-1.79769e+308	0.199884	1	no
C29F9.6	WBGene00016221	chrIII:115362-116618	q1	q2	OK	0.332753	0.396283	0.252081	-0.254033	0.79947	0.999993	no
C29F9.8	WBGene00016222	chrIII:95392-97725	q1	q2	NOTEST	0.273228	0.0983695	-1.47382	1.05935	0.289443	1	no
C29F9.9	WBGene00016223	chrIII:98396-98921	q1	q2	NOTEST	0	0	0	0	1	1	no
C29G2.1	WBGene00016229	chrV:2591173-2591756	q1	q2	OK	3.95849	4.13535	0.0630605	-0.0890489	0.929043	0.999993	no
C29G2.2	WBGene00016230	chrV:2590390-2590819	q1	q2	OK	4.09884	4.31415	0.073862	-0.0966619	0.922995	0.999993	no
C29G2.3	WBGene00016231	chrV:2580870-2585907	q1	q2	OK	3.99037	3.79475	-0.0725192	0.0677713	0.945968	0.999993	no
C29G2.6	WBGene00016234	chrV:2580870-2585907	q1	q2	OK	11.6895	17.4426	0.577404	-0.911212	0.362184	0.999993	no
C29H12.2	WBGene00016235	chrII:6123779-6125395	q1	q2	OK	103.621	83.3523	-0.31402	1.07914	0.280525	0.999993	no
C29H12.5	WBGene00016236	chrII:6110564-6113357	q1	q2	OK	8.47611	7.57723	-0.161733	0.356663	0.721344	0.999993	no
C29H12.6	WBGene00016237	chrII:6114394-6118235	q1	q2	OK	7.97813	6.63452	-0.266057	0.504136	0.614166	0.999993	no
C30A5.10	WBGene00016242	chrIII:8207387-8209775	q1	q2	OK	1.52112	2.23794	0.557043	-0.704596	0.481062	0.999993	no
C30A5.3	WBGene00016238	chrIII:8225024-8226301	q1	q2	OK	103.069	86.4978	-0.252879	0.805901	0.4203	0.999993	no
C30A5.4	WBGene00016239	chrIII:8222154-8223721	q1	q2	OK	0.924691	1.12815	0.286917	-0.413114	0.679523	0.999993	no
C30A5.6	C30A5.6	chrIII:8205265-8207292	q1	q2	OK	1.57404	1.76129	0.162164	-0.221587	0.824635	0.999993	no
C30B5.2	WBGene00016244	chrII:6197155-6198227	q1	q2	OK	133.433	121.533	-0.134778	0.370166	0.711259	0.999993	no
C30B5.4	WBGene00016245	chrII:6195824-6196906	q1	q2	OK	40.3934	39.0176	-0.0499934	0.128116	0.898057	0.999993	no
C30B5.5	WBGene00016246	chrII:6198699-6208157	q1	q2	OK	0.483081	0.822554	0.767844	-0.35155	0.725176	0.999993	no
C30B5.6	WBGene00016247	chrII:6219494-6221683	q1	q2	NOTEST	0.171603	0.19141	0.157593	-0.173427	0.862316	1	no
C30B5.7	WBGene00016248	chrII:6224965-6227064	q1	q2	OK	1.08894	1.34816	0.30806	-0.429967	0.66722	0.999993	no
C30C11.1	WBGene00016249	chrIII:8449682-8450436	q1	q2	OK	79.6475	81.8459	0.0392825	-0.106129	0.91548	0.999993	no
C30E1.2	WBGene00016251	chrX:16926890-16927950	q1	q2	OK	0.495169	0.43084	-0.200769	0.229031	0.818845	0.999993	no
C30E1.3	WBGene00016252	chrX:16925919-16926748	q1	q2	OK	0.447011	0.449652	0.00849956	-0.00953767	0.99239	0.999993	no
C30E1.4	WBGene00016253	chrX:16923862-16925727	q1	q2	NOTEST	0.208507	0.0332769	-2.6475	1.087	0.277038	1	no
C30E1.6	WBGene00016255	chrX:16915768-16916727	q1	q2	NOTEST	0.0389684	0.0493034	0.339384	-0.145699	0.884159	1	no
C30E1.7	C30E1.7	chrX:16914956-16915473	q1	q2	NOTEST	0.0286074	0	-1.79769e+308	-1.79769e+308	0.303748	1	no
C30E1.8	WBGene00016257	chrX:16916738-16919246	q1	q2	NOTEST	0.104421	0.105385	0.0132483	-0.0117869	0.990596	1	no
C30F12.1	WBGene00016260	chrI:6954441-6961138	q1	q2	OK	3.68337	3.99402	0.116815	-0.21406	0.8305	0.999993	no
C30F12.2	WBGene00016261	chrI:6967679-6970189	q1	q2	OK	18.3601	15.1053	-0.281523	0.691831	0.489043	0.999993	no
C30F12.3	WBGene00016262	chrI:6970387-6971797	q1	q2	OK	1.83185	2.4403	0.413761	-0.61384	0.539321	0.999993	no
C30F12.4	WBGene00016263	chrI:6972154-6973788	q1	q2	OK	18.2439	12.3293	-0.565322	1.21781	0.223295	0.999993	no
C30F12.5	WBGene00016264	chrI:6992226-6999570	q1	q2	OK	8.96763	8.95705	-0.00170158	0.0033953	0.997291	0.999993	no
C30F12.6	WBGene00016265	chrI:6989065-6992105	q1	q2	OK	3.69139	4.39319	0.251106	-0.441245	0.659036	0.999993	no
C30F12.7	WBGene00016266	chrI:6974556-6977063	q1	q2	OK	2.88651	3.57664	0.309279	-0.514205	0.607109	0.999993	no
C30F2.2	WBGene00007816	chrX:16076736-16085655	q1	q2	NOTEST	0.0775127	0.140714	0.860266	-0.542364	0.587568	1	no
C30F2.3	WBGene00007817	chrX:16076736-16085655	q1	q2	NOTEST	0.160063	0.0901974	-0.827478	0.592523	0.553501	1	no
C30F2.4	WBGene00007818	chrX:16074988-16075596	q1	q2	NOTEST	0.209322	0	-1.79769e+308	-1.79769e+308	0.303748	1	no
C30F2.5	WBGene00007819	chrX:16094603-16096365	q1	q2	OK	5.60811	6.15531	0.134316	-0.216241	0.8288	0.999993	no
C30F8.3	WBGene00016259	chrI:5096603-5100497	q1	q2	OK	2.25082	2.87728	0.354256	-0.52081	0.602499	0.999993	no
C30G12.1	WBGene00016273	chrII:7299529-7301449	q1	q2	OK	0.7502	1.4433	0.944021	-1.32093	0.186526	0.999993	no
C30G12.2	WBGene00016274	chrII:7290331-7291678	q1	q2	OK	0.496165	0.544198	0.13331	-0.142477	0.886703	0.999993	no
C30G12.3	WBGene00016275	chrII:7274690-7277182	q1	q2	NOTEST	0	0	0	0	1	1	no
C30G12.4	WBGene00016276	chrII:7261606-7263611	q1	q2	OK	4.77652	5.90316	0.305528	-0.49534	0.62036	0.999993	no
C30G12.6	WBGene00016277	chrII:7292151-7295974	q1	q2	OK	21.1433	21.8898	0.0500589	-0.130074	0.896508	0.999993	no
C30G4.2	WBGene00016268	chrX:17044041-17045230	q1	q2	OK	0.572561	0.487104	-0.2332	0.276032	0.782524	0.999993	no
C30G4.4	WBGene00016269	chrX:17059194-17069134	q1	q2	OK	0.451934	0.507136	0.166259	-0.111399	0.9113	0.999993	no
C30G4.5	C30G4.5	chrX:17071807-17072108	q1	q2	OK	0.239284	0.371281	0.633785	-0.25188	0.801134	0.999993	no
C30G4.6	WBGene00016271	chrX:17073735-17080324	q1	q2	OK	0.73575	0.60266	-0.287872	0.412947	0.679645	0.999993	no
C30G4.7	C30G4.7	chrX:17056867-17058462	q1	q2	OK	1.25469	0.745851	-0.75037	0.982325	0.32594	0.999993	no
C30G7.2	WBGene00044176	chrV:14937033-14938941	q1	q2	OK	0.769838	0.927902	0.269419	-0.291315	0.77081	0.999993	no
C30G7.3	WBGene00044177	chrV:14942119-14945651	q1	q2	NOTEST	0.0630233	0.0943155	0.58161	-0.405847	0.684855	1	no
C30G7.4	WBGene00044178	chrV:14946622-14947212	q1	q2	NOTEST	0	0	0	0	1	1	no
C30G7.5	WBGene00044179	chrV:14953097-14954716	q1	q2	NOTEST	0	0.0144198	1.79769e+308	1.79769e+308	0.285806	1	no
C30H6.10	WBGene00007827	chrIV:17368555-17370474	q1	q2	OK	1.97485	1.45113	-0.444568	0.493555	0.621621	0.999993	no
C30H6.12	WBGene00044238	chrIV:17385175-17386746	q1	q2	OK	0.671484	0.523165	-0.360085	0.332337	0.739635	0.999993	no
C30H6.5	WBGene00007823	chrIV:17371731-17375588	q1	q2	OK	0.746106	0.817356	0.131584	-0.168089	0.866514	0.999993	no
C30H6.7	WBGene00007824	chrIV:17380595-17382189	q1	q2	OK	82.2241	77.8095	-0.0796149	0.251619	0.801335	0.999993	no
C30H6.9	WBGene00007826	chrIV:17379316-17380133	q1	q2	OK	30.4853	26.0098	-0.229057	0.494811	0.620733	0.999993	no
C30H7.2	WBGene00016278	chrI:5416652-5420734	q1	q2	OK	54.0317	53.2914	-0.019902	0.0576541	0.954024	0.999993	no
C31B8.1	WBGene00016279	chrV:2931549-2932986	q1	q2	NOTEST	0	0	0	0	1	1	no
C31B8.12	WBGene00016285	chrV:2925190-2927013	q1	q2	NOTEST	0.084168	0.0500986	-0.748503	0.47076	0.637812	1	no
C31B8.16	WBGene00044602	chrV:2930050-2931168	q1	q2	NOTEST	0.0122813	0.0313287	1.35102	-0.372897	0.709225	1	no
C31B8.2	WBGene00016280	chrV:2916520-2917702	q1	q2	NOTEST	0.106095	0.0945685	-0.165919	0.10153	0.91913	1	no
C31B8.4	WBGene00016281	chrV:2896634-2898415	q1	q2	NOTEST	0.0772026	0.222255	1.5255	-1.3895	0.164681	1	no
C31B8.7	WBGene00016282	chrV:2900445-2903308	q1	q2	OK	3.56214	3.88708	0.125942	-0.215971	0.82901	0.999993	no
C31B8.8	WBGene00016283	chrV:2905768-2909681	q1	q2	NOTEST	0.0451718	0.0229348	-0.977882	0.589313	0.555652	1	no
C31B8.9	WBGene00016284	chrV:2911165-2912999	q1	q2	NOTEST	0.0375565	0.18736	2.31868	-1.20731	0.227311	1	no
C31C9.2	WBGene00007836	chrII:13636912-13638415	q1	q2	OK	325.19	319.614	-0.0249539	0.0976958	0.922174	0.999993	no
C31C9.6	WBGene00007840	chrII:13655813-13662011	q1	q2	NOTEST	0.209019	0.140792	-0.57007	0.741572	0.458347	1	no
C31C9.7	WBGene00007841	chrII:13669033-13669639	q1	q2	OK	1.15014	1.19179	0.0513231	-0.0612486	0.951161	0.999993	no
C31E10.1	WBGene00007842	chrX:13984421-13985623	q1	q2	NOTEST	0.114086	0.153609	0.429142	-0.376153	0.706803	1	no
C31E10.3	WBGene00007844	chrX:13986542-13988940	q1	q2	NOTEST	0.169853	0.192903	0.183589	-0.196692	0.844068	1	no
C31E10.4	WBGene00007845	chrX:13989426-13990093	q1	q2	NOTEST	0.153282	0	-1.79769e+308	-1.79769e+308	0.085728	1	no
C31E10.5	WBGene00007846	chrX:13991426-13995765	q1	q2	OK	33.2626	33.2637	4.73116e-05	-0.000146342	0.999883	0.999993	no
C31E10.6	WBGene00007847	chrX:13996237-13999220	q1	q2	OK	9.21984	10.3829	0.171392	-0.393253	0.694133	0.999993	no
C31E10.7	WBGene00007848	chrX:14001832-14011613	q1	q2	OK	255.798	287.464	0.168378	-0.559006	0.576158	0.999993	no
C31G12.1	WBGene00007850	chrV:18179933-18181261	q1	q2	OK	46.6818	46.0481	-0.0197169	0.0462654	0.963099	0.999993	no
C31G12.3	WBGene00007852	chrV:18185181-18185433	q1	q2	OK	0	0.488555	1.79769e+308	1.79769e+308	0.264219	0.999993	no
C31G12.4	WBGene00007853	chrV:18176745-18178682	q1	q2	OK	0.989568	0.983052	-0.00953019	0.0127458	0.989831	0.999993	no
C31H1.1	WBGene00016286	chrIV:5797042-5800146	q1	q2	NOTEST	0.0830799	0.0811319	-0.0342305	0.0339798	0.972893	1	no
C31H1.2	WBGene00016287	chrIV:5791284-5793445	q1	q2	OK	0.305695	0.636054	1.05706	-1.35784	0.174516	0.999993	no
C31H1.5	WBGene00016288	chrIV:5794981-5796751	q1	q2	NOTEST	0.00551502	0.0622683	3.49706	-0.885409	0.375936	1	no
C31H1.7	C31H1.7	chrIV:5808568-5810292	q1	q2	OK	1.82067	2.32182	0.350789	-0.356076	0.721783	0.999993	no
C31H1.8	WBGene00016291	chrIV:5811642-5814129	q1	q2	OK	23.7915	18.662	-0.350349	0.962171	0.335964	0.999993	no
C31H2.3	WBGene00016293	chrX:5151515-5154368	q1	q2	OK	0.419566	0.379833	-0.143531	0.139329	0.88919	0.999993	no
C31H2.4	WBGene00016294	chrX:5155132-5159630	q1	q2	OK	24.3352	25.7751	0.0829293	-0.200314	0.841235	0.999993	no
C31H5.1	WBGene00007854	chrI:9025848-9031225	q1	q2	NOTEST	0.221832	0.226272	0.02859	-0.0310002	0.975269	1	no
C31H5.4	WBGene00007855	chrI:9042262-9042592	q1	q2	OK	656.616	710.517	0.113819	-0.374694	0.707888	0.999993	no
C31H5.5	WBGene00007856	chrI:9048403-9049325	q1	q2	OK	19.3113	21.988	0.187268	-0.3424	0.73205	0.999993	no
C31H5.6	WBGene00007857	chrI:9043311-9046882	q1	q2	OK	1.72179	2.19773	0.352106	-0.362682	0.716842	0.999993	no
C31H5.7	WBGene00007858	chrI:9041366-9041964	q1	q2	OK	5.29249	6.14901	0.216407	-0.319155	0.749609	0.999993	no
C32A3.2	WBGene00007859	chrIII:3628341-3630543	q1	q2	OK	39.1864	40.6756	0.0538128	-0.144066	0.885448	0.999993	no
C32A3.3	WBGene00007860	chrIII:3636027-3643648	q1	q2	OK	13.1759	11.7009	-0.171277	0.380114	0.703861	0.999993	no
C32A9.1	WBGene00007861	chrX:10258672-10260075	q1	q2	NOTEST	0.210668	0.204053	-0.0460244	0.0438474	0.965026	1	no
C32B5.13	WBGene00016306	chrII:960534-964267	q1	q2	OK	3.32871	3.11113	-0.0975217	0.0880079	0.92987	0.999993	no
C32B5.15	WBGene00016308	chrII:970651-972957	q1	q2	OK	19.3686	15.3281	-0.337543	0.71301	0.47584	0.999993	no
C32B5.6	WBGene00016299	chrII:968412-970526	q1	q2	OK	3.32167	4.79296	0.529005	-0.783333	0.433431	0.999993	no
C32B5.7	WBGene00016300	chrII:960534-964267	q1	q2	OK	4.19452	3.8697	-0.116282	0.155384	0.876518	0.999993	no
C32C4.1	WBGene00007862	chrV:10642009-10645094	q1	q2	OK	2.5936	2.76043	0.0899343	-0.153173	0.878262	0.999993	no
C32C4.3	WBGene00007863	chrV:10645135-10646907	q1	q2	OK	5.91799	7.84124	0.405976	-0.733116	0.463488	0.999993	no
C32D5.1	WBGene00016310	chrII:6343025-6345893	q1	q2	OK	2.55706	2.98388	0.222704	-0.112034	0.910796	0.999993	no
C32D5.10	WBGene00016317	chrII:6349180-6351955	q1	q2	OK	43.4857	42.7499	-0.0246202	0.0804948	0.935844	0.999993	no
C32D5.11	WBGene00016318	chrII:6352509-6355879	q1	q2	OK	60.7552	54.1911	-0.164952	0.582011	0.560559	0.999993	no
C32D5.12	WBGene00016319	chrII:6356405-6358973	q1	q2	OK	41.3383	53.2445	0.365153	-1.01625	0.309511	0.999993	no
C32D5.14	WBGene00044755	chrII:6335455-6336302	q1	q2	NOTEST	0.0833018	0.14169	0.766316	-0.27217	0.785491	1	no
C32D5.3	WBGene00016311	chrII:6318055-6321127	q1	q2	OK	36.8411	37.8504	0.0389918	-0.129145	0.897243	0.999993	no
C32D5.4	WBGene00016312	chrII:6321329-6323047	q1	q2	OK	0.282759	0.245993	-0.200954	0.231699	0.816772	0.999993	no
C32D5.6	WBGene00016314	chrII:6331881-6333934	q1	q2	OK	1.62719	2.36204	0.537646	-0.818523	0.413058	0.999993	no
C32D5.7	WBGene00016315	chrII:6336312-6339525	q1	q2	OK	4.21693	4.56972	0.11591	-0.209572	0.834002	0.999993	no
C32E12.1	WBGene00016327	chrI:5230565-5241917	q1	q2	OK	0.494341	0.584217	0.240998	-0.108831	0.913336	0.999993	no
C32E12.4	WBGene00016330	chrI:5230565-5241917	q1	q2	OK	4.76305	5.24618	0.139382	-0.327873	0.743008	0.999993	no
C32E8.1	WBGene00016320	chrI:3794558-3798056	q1	q2	OK	0.663254	1.16683	0.814966	-0.243432	0.807671	0.999993	no
C32E8.11	WBGene00016326	chrI:3807475-3816799	q1	q2	OK	47.0908	47.1383	0.00145608	-0.00568374	0.995465	0.999993	no
C32E8.3	WBGene00016321	chrI:3786596-3787478	q1	q2	OK	96.5624	104.106	0.108525	-0.313223	0.754111	0.999993	no
C32E8.4	WBGene00016322	chrI:3783837-3784438	q1	q2	OK	0.457597	0.407855	-0.166022	0.170294	0.864779	0.999993	no
C32E8.5	WBGene00016323	chrI:3782120-3783263	q1	q2	OK	115.576	137.031	0.245661	-0.83377	0.40441	0.999993	no
C32E8.6	WBGene00016324	chrI:3774708-3777471	q1	q2	OK	1.08287	1.39066	0.360917	-0.368889	0.712211	0.999993	no
C32E8.9	WBGene00016325	chrI:3794558-3798056	q1	q2	OK	13.6777	14.4378	0.0780189	-0.156677	0.875499	0.999993	no
C32F10.4	WBGene00016332	chrI:5807711-5815640	q1	q2	OK	15.63	19.8338	0.343643	-0.27812	0.780921	0.999993	no
C32F10.8	WBGene00016333	chrI:5822843-5826158	q1	q2	OK	36.71	33.1641	-0.14655	0.405217	0.685318	0.999993	no
C32H11.1	WBGene00007864	chrIV:12912765-12914932	q1	q2	NOTEST	0.0495441	0.0222185	-1.15696	0.64022	0.522029	1	no
C32H11.11	WBGene00007874	chrIV:12938203-12939047	q1	q2	NOTEST	0.180469	0.169005	-0.0946839	0.0687718	0.945171	1	no
C32H11.3	WBGene00007866	chrIV:12918586-12920196	q1	q2	NOTEST	0.0791113	0.085429	0.110842	-0.0815918	0.934971	1	no
C32H11.4	WBGene00007867	chrIV:12921282-12923264	q1	q2	OK	4.04842	3.0811	-0.393911	0.616564	0.537523	0.999993	no
C32H11.5	WBGene00007868	chrIV:12923500-12924354	q1	q2	OK	2.62732	3.44108	0.389272	-0.517583	0.604749	0.999993	no
C32H11.6	WBGene00007869	chrIV:12925904-12926712	q1	q2	OK	0.226373	0.35791	0.660894	-0.609079	0.542472	0.999993	no
C32H11.7	WBGene00007870	chrIV:12930682-12931490	q1	q2	OK	3.65413	3.88132	0.0870208	-0.0672424	0.946389	0.999993	no
C32H11.8	WBGene00007871	chrIV:12933903-12934747	q1	q2	NOTEST	0.127043	0.138765	0.127336	-0.0808008	0.9356	1	no
C32H11.9	WBGene00007872	chrIV:12935026-12936247	q1	q2	NOTEST	0	2.21186e-05	1.79769e+308	1.79769e+308	0.499776	1	no
C33A11.1	WBGene00007877	chrX:15355168-15363794	q1	q2	OK	2.70091	2.53447	-0.0917663	0.170169	0.864877	0.999993	no
C33A11.2	WBGene00007878	chrX:15365924-15377616	q1	q2	OK	5.726	4.05216	-0.498836	0.720308	0.471335	0.999993	no
C33A12.1	WBGene00007880	chrIV:9523759-9524878	q1	q2	OK	272.235	305.598	0.166783	-0.563116	0.573356	0.999993	no
C33A12.12	WBGene00007887	chrIV:9482052-9485066	q1	q2	OK	33.0162	37.013	0.164858	-0.503488	0.614621	0.999993	no
C33A12.19	WBGene00007890	chrIV:9516979-9518910	q1	q2	OK	0.833155	1.22962	0.561556	-0.433017	0.665003	0.999993	no
C33A12.3	WBGene00007882	chrIV:9510730-9512994	q1	q2	OK	30.293	25.4958	-0.248721	0.614212	0.539075	0.999993	no
C33A12.4	WBGene00007883	chrIV:9510037-9510577	q1	q2	OK	31.3161	40.0074	0.353363	-0.675551	0.499326	0.999993	no
C33A12.7	WBGene00007886	chrIV:9506915-9508760	q1	q2	OK	22.663	26.1843	0.208363	-0.467081	0.640442	0.999993	no
C33B4.2	WBGene00007891	chrII:11370250-11372009	q1	q2	OK	1.20304	1.45461	0.273952	-0.383837	0.701099	0.999993	no
C33B4.4	WBGene00007892	chrII:11375587-11376207	q1	q2	OK	3.96715	2.02614	-0.969371	1.30701	0.191208	0.999993	no
C33B4.5	WBGene00007893	chrII:11383262-11384399	q1	q2	OK	0.587307	0.653003	0.152975	-0.173766	0.862049	0.999993	no
C33C12.1	WBGene00016334	chrII:2197850-2198680	q1	q2	OK	0.640029	0.270714	-1.24137	1.03255	0.301813	0.999993	no
C33C12.10	WBGene00016342	chrII:2192368-2194119	q1	q2	OK	16.4482	13.0887	-0.329609	0.670866	0.502306	0.999993	no
C33C12.4	WBGene00016336	chrII:2165494-2166498	q1	q2	OK	1.57965	3.39276	1.10286	-1.54755	0.12173	0.999993	no
C33C12.7	WBGene00016339	chrII:2174617-2175294	q1	q2	OK	0.159997	0.443562	1.47109	-0.828587	0.407338	0.999993	no
C33C12.9	WBGene00016341	chrII:2187152-2189462	q1	q2	OK	5.68792	4.18008	-0.444369	0.727364	0.467003	0.999993	no
C33D12.2	WBGene00016343	chrX:3041967-3045782	q1	q2	OK	1.17385	1.29751	0.144489	-0.207482	0.835633	0.999993	no
C33D3.3	WBGene00007894	chrX:10485239-10486598	q1	q2	OK	0.582561	1.05839	0.861383	-1.09989	0.271381	0.999993	no
C33D3.4	WBGene00007895	chrX:10487828-10489701	q1	q2	NOTEST	0.0223339	0.0472941	1.08243	-0.494119	0.621222	1	no
C33D3.5	WBGene00007896	chrX:10491282-10497202	q1	q2	NOTEST	0.0180854	0.0488414	1.43328	-0.794713	0.426781	1	no
C33D9.10	WBGene00044239	chrIV:8787460-8787874	q1	q2	OK	4.25256	6.54892	0.622924	-0.807273	0.419509	0.999993	no
C33D9.3	WBGene00007898	chrIV:8790732-8793281	q1	q2	NOTEST	0.225198	0.242287	0.105524	-0.0702266	0.944013	1	no
C33D9.5	WBGene00007899	chrIV:8778373-8780859	q1	q2	OK	45.1821	57.6361	0.351222	-1.11782	0.263642	0.999993	no
C33D9.6	WBGene00007900	chrIV:8775419-8778132	q1	q2	OK	71.7742	73.6916	0.0380358	-0.13057	0.896115	0.999993	no
C33D9.8	WBGene00007901	chrIV:8783363-8786637	q1	q2	OK	48.8067	61.8466	0.341617	-1.1117	0.266267	0.999993	no
C33D9.9	WBGene00007902	chrIV:8773938-8775304	q1	q2	OK	56.3598	69.3185	0.298575	-0.858906	0.390392	0.999993	no
C33E10.1	WBGene00016345	chrX:17305272-17306233	q1	q2	OK	52.7046	47.5013	-0.149961	0.405669	0.684986	0.999993	no
C33E10.10	WBGene00016350	chrX:17301299-17301849	q1	q2	OK	1.82885	2.14629	0.230908	-0.292244	0.7701	0.999993	no
C33E10.5	WBGene00016347	chrX:17272859-17279458	q1	q2	NOTEST	0.0902811	0.0721882	-0.322662	0.306451	0.759261	1	no
C33E10.6	WBGene00016348	chrX:17266620-17269886	q1	q2	NOTEST	0.0186163	0.0344312	0.887146	-0.662732	0.507502	1	no
C33E10.8	WBGene00016349	chrX:17293044-17294464	q1	q2	OK	0.331368	0.234476	-0.49899	0.518893	0.603835	0.999993	no
C33F10.1	WBGene00016351	chrII:4835023-4835710	q1	q2	NOTEST	0.0210416	0.0746561	1.82702	-0.597448	0.550208	1	no
C33F10.11	WBGene00016357	chrII:4834159-4834809	q1	q2	NOTEST	0	0.0465019	1.79769e+308	1.79769e+308	0.225131	1	no
C33F10.12	WBGene00016358	chrII:4836298-4837729	q1	q2	NOTEST	0.0742384	0.113896	0.61748	-0.512894	0.608025	1	no
C33F10.14	WBGene00050941	chrII:4797369-4798111	q1	q2	OK	67.6026	68.6464	0.0221063	-0.0594993	0.952554	0.999993	no
C33F10.4	WBGene00016353	chrII:4795755-4797209	q1	q2	OK	22.2452	20.3917	-0.125511	0.292351	0.770018	0.999993	no
C33F10.8	WBGene00016356	chrII:4823375-4825191	q1	q2	OK	0.439098	0.384201	-0.192679	0.245804	0.805834	0.999993	no
C33G3.5	WBGene00007905	chrX:14076246-14078605	q1	q2	NOTEST	0.0512681	0.167563	1.70857	-1.4258	0.153926	1	no
C33G3.6	WBGene00007906	chrX:14080320-14084256	q1	q2	OK	7.11458	6.63724	-0.100194	0.218611	0.826953	0.999993	no
C33G8.13	WBGene00016369	chrV:7015023-7015954	q1	q2	NOTEST	0	0	0	0	1	1	no
C33G8.2	WBGene00016360	chrV:7009964-7012226	q1	q2	NOTEST	0	0.0108037	1.79769e+308	1.79769e+308	0.285806	1	no
C33G8.3	WBGene00016361	chrV:7007593-7008206	q1	q2	NOTEST	0.032421	0	-1.79769e+308	-1.79769e+308	0.303748	1	no
C33G8.4	WBGene00016362	chrV:7006262-7006797	q1	q2	OK	0.53825	0.677681	0.332331	-0.292238	0.770105	0.999993	no
C33H5.1	WBGene00016370	chrIV:7809148-7810669	q1	q2	OK	0.326932	0.312125	-0.0668662	0.0755164	0.939804	0.999993	no
C33H5.13	WBGene00016379	chrIV:7791696-7792213	q1	q2	OK	11.1271	10.2566	-0.117517	0.183646	0.854291	0.999993	no
C33H5.16	WBGene00016382	chrIV:7801903-7803129	q1	q2	NOTEST	0.137639	0.187014	0.442257	-0.399856	0.689263	1	no
C33H5.17	WBGene00016383	chrIV:7811208-7815721	q1	q2	OK	25.3292	29.6586	0.227648	-0.428654	0.668175	0.999993	no
C33H5.18	WBGene00016384	chrIV:7811208-7815721	q1	q2	OK	47.5531	47.3814	-0.00521813	0.0148094	0.988184	0.999993	no
C33H5.2	WBGene00016371	chrIV:7805052-7807936	q1	q2	OK	0.345227	0.361588	0.0668046	-0.0859634	0.931496	0.999993	no
C33H5.6	WBGene00016373	chrIV:7776012-7777205	q1	q2	OK	59.3328	57.2624	-0.0512417	0.133325	0.893937	0.999993	no
C33H5.7	WBGene00016374	chrIV:7774435-7775938	q1	q2	OK	78.7279	72.611	-0.116686	0.371291	0.710421	0.999993	no
C33H5.8	WBGene00016375	chrIV:7778008-7778951	q1	q2	OK	41.6645	39.3562	-0.0822285	0.210808	0.833037	0.999993	no
C34B2.10	WBGene00016395	chrI:10682459-10683139	q1	q2	OK	200.287	228.607	0.190806	-0.610716	0.541388	0.999993	no
C34B2.11	WBGene00016396	chrI:10691333-10696772	q1	q2	OK	7.84406	10.3665	0.40225	-0.707019	0.479555	0.999993	no
C34B2.3	WBGene00016388	chrI:10672762-10674847	q1	q2	NOTEST	0.0133076	0.114614	3.10646	-1.34648	0.178149	1	no
C34B2.4	WBGene00016389	chrI:10671533-10672578	q1	q2	OK	0.338518	0.355739	0.0715849	-0.0530902	0.95766	0.999993	no
C34B2.5	WBGene00016390	chrI:10675174-10676800	q1	q2	OK	61.1332	64.6576	0.0808631	-0.213941	0.830593	0.999993	no
C34B2.8	WBGene00016393	chrI:10685811-10687047	q1	q2	OK	325.567	363.56	0.159239	-0.593219	0.553035	0.999993	no
C34B2.9	WBGene00016394	chrI:10699550-10703789	q1	q2	OK	3.55913	3.54046	-0.00758719	0.0117066	0.99066	0.999993	no
C34B4.2	WBGene00007907	chrV:13083147-13092497	q1	q2	OK	4.49253	2.65387	-0.759434	1.11805	0.263545	0.999993	no
C34B4.3	WBGene00007908	chrV:13066694-13071137	q1	q2	OK	1.74463	1.81118	0.0540054	-0.0794822	0.936649	0.999993	no
C34B4.4	WBGene00007909	chrV:13083147-13092497	q1	q2	NOTEST	0.0746827	0.156098	1.06361	-0.191937	0.847791	1	no
C34B4.5	WBGene00007910	chrV:13096025-13097442	q1	q2	NOTEST	0.12136	0.229144	0.916954	-0.882451	0.377533	1	no
C34B4.7	WBGene00077698	chrV:13092650-13094431	q1	q2	NOTEST	0.0675462	0.0921413	0.447974	-0.323413	0.746382	1	no
C34B7.1	WBGene00007911	chrI:8330544-8332712	q1	q2	OK	2.9569	2.84768	-0.0542962	0.0911042	0.92741	0.999993	no
C34B7.2	WBGene00007912	chrI:8336974-8346016	q1	q2	OK	38.322	40.6645	0.0855978	-0.285504	0.775258	0.999993	no
C34C12.1	WBGene00007920	chrIII:3454332-3455838	q1	q2	OK	0.866432	0.893883	0.0449994	-0.0657615	0.947568	0.999993	no
C34C12.2	WBGene00007921	chrIII:3456464-3460068	q1	q2	OK	31.8409	29.6953	-0.100647	0.309021	0.757306	0.999993	no
C34C12.4	WBGene00007923	chrIII:3467653-3469736	q1	q2	OK	23.6609	21.9227	-0.110081	0.22159	0.824633	0.999993	no
C34C12.5	WBGene00007924	chrIII:3471990-3473701	q1	q2	OK	84.1415	74.5235	-0.175122	0.537362	0.591017	0.999993	no
C34C12.6	WBGene00007925	chrIII:3482577-3484830	q1	q2	OK	21.6352	21.7634	0.00852687	-0.0209654	0.983273	0.999993	no
C34C12.7	WBGene00007926	chrIII:3484847-3486029	q1	q2	OK	2.67604	2.92304	0.127373	-0.176939	0.859557	0.999993	no
C34C12.8	WBGene00007927	chrIII:3460393-3461578	q1	q2	OK	102.643	112.98	0.138424	-0.437322	0.661878	0.999993	no
C34C12.9	WBGene00007928	chrIII:3474242-3475437	q1	q2	OK	0.419493	0.600183	0.516757	-0.501209	0.616224	0.999993	no
C34C6.2	WBGene00007915	chrII:8679612-8683816	q1	q2	OK	33.6366	31.5719	-0.0913888	0.288431	0.773017	0.999993	no
C34C6.3	WBGene00007916	chrII:8691898-8693981	q1	q2	OK	8.57105	10.0171	0.224917	-0.459087	0.646172	0.999993	no
C34C6.4	WBGene00007917	chrII:8696545-8698878	q1	q2	OK	19.8646	19.9013	0.00265876	-0.00703742	0.994385	0.999993	no
C34C6.7	WBGene00007919	chrII:8707016-8708804	q1	q2	OK	2.21084	3.11438	0.494352	-0.748686	0.454046	0.999993	no
C34D1.1	WBGene00007929	chrV:13222641-13225927	q1	q2	NOTEST	0.0566979	0.0713228	0.331067	-0.199338	0.841999	1	no
C34D1.2	WBGene00007930	chrV:13236156-13236590	q1	q2	NOTEST	0	0	0	0	1	1	no
C34D1.4	WBGene00007931	chrV:13257088-13259278	q1	q2	OK	0.823744	0.753242	-0.129082	0.15965	0.873157	0.999993	no
C34D10.1	WBGene00016406	chrX:8029450-8031406	q1	q2	OK	12.5182	8.91065	-0.490429	0.919696	0.357732	0.999993	no
C34D10.2	WBGene00016407	chrX:8017971-8026800	q1	q2	OK	0.636015	0.915853	0.526055	-0.807521	0.419366	0.999993	no
C34D4.1	WBGene00016397	chrIV:7156887-7160097	q1	q2	OK	5.5331	6.42963	0.216647	-0.416649	0.676935	0.999993	no
C34D4.10	WBGene00016402	chrIV:7119992-7121401	q1	q2	OK	0.997255	1.06569	0.0957503	-0.135046	0.892576	0.999993	no
C34D4.13	WBGene00016404	chrIV:7133573-7134062	q1	q2	OK	127.918	129.887	0.022042	-0.0546788	0.956394	0.999993	no
C34D4.14	WBGene00016405	chrIV:7134334-7144552	q1	q2	OK	123.648	138.526	0.163911	-0.674468	0.500014	0.999993	no
C34D4.2	WBGene00016398	chrIV:7154711-7156005	q1	q2	NOTEST	0.101685	0.145035	0.512302	-0.448433	0.653841	1	no
C34D4.3	WBGene00016399	chrIV:7153649-7154171	q1	q2	NOTEST	0.0631587	0.0453175	-0.478914	0.148158	0.882218	1	no
C34D4.4	WBGene00016400	chrIV:7149324-7152478	q1	q2	OK	75.031	65.9488	-0.186139	0.46117	0.644677	0.999993	no
C34E10.10	WBGene00016411	chrIII:5226778-5227650	q1	q2	OK	44.7154	39.4035	-0.18245	0.454393	0.649546	0.999993	no
C34E10.11	WBGene00016412	chrIII:5234578-5236325	q1	q2	OK	60.6179	57.7629	-0.0696006	0.206208	0.836629	0.999993	no
C34E10.8	WBGene00016409	chrIII:5249049-5254152	q1	q2	OK	20.5117	16.7048	-0.296186	0.888803	0.374109	0.999993	no
C34E10.9	WBGene00016410	chrIII:5260654-5263797	q1	q2	OK	1.24333	1.94291	0.644012	-0.0952142	0.924145	0.999993	no
C34E11.2	WBGene00007935	chrX:11805294-11811397	q1	q2	OK	1.55296	1.78965	0.204661	-0.338215	0.735201	0.999993	no
C34E11.4	WBGene00007937	chrX:11804180-11805203	q1	q2	OK	2.01884	2.34811	0.217977	-0.283608	0.776711	0.999993	no
C34E7.3	WBGene00007933	chrX:12930265-12931955	q1	q2	OK	0.561783	0.761743	0.43929	-0.537349	0.591026	0.999993	no
C34E7.4	WBGene00007934	chrX:12932168-12934907	q1	q2	OK	70.3347	66.4864	-0.0811772	0.249219	0.803192	0.999993	no
C34F11.1	WBGene00016413	chrII:5212951-5213913	q1	q2	OK	0.309123	0.508585	0.71831	-0.814531	0.415341	0.999993	no
C34F11.2	WBGene00016414	chrII:5212258-5212777	q1	q2	NOTEST	0.130015	0.199776	0.619714	-0.357392	0.720798	1	no
C34F11.3	WBGene00016415	chrII:5203302-5210953	q1	q2	OK	20.1548	20.8625	0.0497895	-0.135971	0.891844	0.999993	no
C34F11.5	WBGene00016416	chrII:5195893-5199221	q1	q2	NOTEST	0.044481	0.097042	1.12542	-1.14676	0.251481	1	no
C34F11.8	WBGene00016417	chrII:5203302-5210953	q1	q2	NOTEST	0.0268925	0.127168	2.24146	-0.159484	0.873288	1	no
C34F6.1	WBGene00007938	chrX:11192446-11196776	q1	q2	OK	0.818744	0.761511	-0.104547	0.166336	0.867892	0.999993	no
C34F6.10	WBGene00007944	chrX:11229203-11237300	q1	q2	OK	10.6513	9.96756	-0.095721	0.278336	0.780754	0.999993	no
C34F6.11	WBGene00007945	chrX:11201457-11203925	q1	q2	OK	3.03338	3.66984	0.274789	-0.414597	0.678437	0.999993	no
C34F6.5	WBGene00007939	chrX:11208303-11208807	q1	q2	OK	22.6284	27.0043	0.255056	-0.430904	0.666538	0.999993	no
C34F6.6	C34F6.6	chrX:11207422-11208059	q1	q2	OK	26.4757	28.3779	0.100101	-0.184649	0.853504	0.999993	no
C34F6.7	WBGene00007941	chrX:11210050-11215405	q1	q2	OK	3.82971	3.56835	-0.101977	0.19267	0.847217	0.999993	no
C34F6.8	WBGene00007942	chrX:11215630-11222582	q1	q2	OK	68.8157	80.2782	0.22227	-0.670907	0.50228	0.999993	no
C34F6.9	WBGene00007943	chrX:11215630-11222582	q1	q2	OK	13.3472	11.9169	-0.163529	0.323116	0.746607	0.999993	no
C34G6.1	WBGene00016418	chrI:5906713-5917784	q1	q2	OK	28.3253	27.6794	-0.0332801	0.11799	0.906076	0.999993	no
C34G6.3	WBGene00016420	chrI:5896654-5897386	q1	q2	OK	0.325258	0.184168	-0.820565	0.582987	0.559902	0.999993	no
C34G6.5	WBGene00016421	chrI:5872176-5874285	q1	q2	OK	31.7748	28.4585	-0.159023	0.426219	0.669949	0.999993	no
C34H4.1	WBGene00016424	chrIV:1555578-1557554	q1	q2	OK	0.564452	0.686131	0.281633	-0.372696	0.709375	0.999993	no
C34H4.2	WBGene00016425	chrIV:1553788-1555563	q1	q2	OK	0.552555	0.526274	-0.0703023	0.0957928	0.923685	0.999993	no
C34H4.5	WBGene00016427	chrIV:1547039-1550240	q1	q2	OK	8.74602	7.34631	-0.251607	0.276409	0.782234	0.999993	no
C35A11.1	WBGene00016428	chrV:5405341-5408327	q1	q2	OK	1.9136	2.41598	0.336317	-0.484179	0.628259	0.999993	no
C35A11.2	WBGene00016429	chrV:5386093-5389140	q1	q2	OK	4.01615	5.38518	0.423183	-0.694247	0.487527	0.999993	no
C35A11.3	WBGene00016430	chrV:5372401-5377484	q1	q2	NOTEST	0	0	0	0	1	1	no
C35A11.4	WBGene00016431	chrV:5389467-5393132	q1	q2	OK	0.49467	0.570873	0.206703	-0.244701	0.806688	0.999993	no
C35A5.10	WBGene00044016	chrV:10504212-10505266	q1	q2	OK	3.74709	4.35835	0.218009	-0.314727	0.752969	0.999993	no
C35A5.11	WBGene00044024	chrV:10502192-10503004	q1	q2	OK	129.737	176.309	0.442521	-1.19243	0.233094	0.999993	no
C35A5.3	WBGene00007947	chrV:10499359-10501374	q1	q2	OK	1.03529	1.41251	0.448224	-0.599903	0.548571	0.999993	no
C35A5.4	WBGene00007948	chrV:10497061-10499301	q1	q2	NOTEST	0.0353798	0.0213611	-0.727941	0.348543	0.727433	1	no
C35A5.5	WBGene00007949	chrV:10505826-10507806	q1	q2	OK	3.25951	5.15992	0.662693	-1.16941	0.242237	0.999993	no
C35A5.6	WBGene00007950	chrV:10509032-10510428	q1	q2	OK	6.7284	6.15173	-0.129272	0.143353	0.886011	0.999993	no
C35A5.7	WBGene00007951	chrV:10510660-10514347	q1	q2	OK	1.51348	1.69526	0.163641	-0.250201	0.802432	0.999993	no
C35A5.8	WBGene00007952	chrV:10521967-10525884	q1	q2	OK	123.214	131.145	0.09	-0.356856	0.7212	0.999993	no
C35A5.9	WBGene00007953	chrV:10526285-10528372	q1	q2	OK	1.98413	2.86476	0.529908	-0.801377	0.422914	0.999993	no
C35B1.2	WBGene00016432	chrIV:4086204-4102888	q1	q2	OK	37.8483	42.4026	0.163925	-0.497364	0.618932	0.999993	no
C35B1.3	WBGene00016433	chrIV:4081128-4081341	q1	q2	OK	1.68473	0.368086	-2.19441	0.881433	0.378084	0.999993	no
C35B1.4	WBGene00016434	chrIV:4079797-4080197	q1	q2	OK	0.500952	0.451307	-0.150564	0.125168	0.90039	0.999993	no
C35B1.5	WBGene00016435	chrIV:4083586-4084202	q1	q2	OK	67.3947	70.9789	0.0747565	-0.183145	0.854684	0.999993	no
C35B1.7	WBGene00016436	chrIV:4109057-4110464	q1	q2	OK	0.157082	0.372134	1.24431	-0.813976	0.415659	0.999993	no
C35B1.8	WBGene00016437	chrIV:4077663-4078182	q1	q2	OK	1.04311	2.0989	1.00874	-1.03548	0.300445	0.999993	no
C35B8.3	WBGene00016438	chrX:9213893-9216797	q1	q2	OK	9.15754	8.76271	-0.0635825	0.131716	0.895209	0.999993	no
C35B8.4	WBGene00044743	chrX:9211177-9212087	q1	q2	OK	9.25373	12.9442	0.484199	-0.653999	0.513112	0.999993	no
C35C5.10	WBGene00007959	chrX:11554728-11559792	q1	q2	OK	3.35058	3.15578	-0.086414	0.108826	0.913341	0.999993	no
C35C5.11	WBGene00044121	chrX:11542071-11544995	q1	q2	NOTEST	0.0446082	0.033709	-0.404175	0.294161	0.768635	1	no
C35C5.2	WBGene00007954	chrX:11537975-11541351	q1	q2	NOTEST	0.00762126	0.0237444	1.63948	-0.716374	0.473761	1	no
C35C5.3	WBGene00007955	chrX:11545049-11547497	q1	q2	OK	149.657	148.821	-0.00808035	0.0230827	0.981584	0.999993	no
C35C5.6	WBGene00007956	chrX:11563921-11569624	q1	q2	OK	22.5849	22.3324	-0.016219	0.0529648	0.95776	0.999993	no
C35C5.8	WBGene00007957	chrX:11533987-11536491	q1	q2	OK	0.786031	0.761121	-0.04646	0.0350709	0.972023	0.999993	no
C35C5.9	WBGene00007958	chrX:11536501-11537056	q1	q2	OK	1.29824	1.0655	-0.285033	0.273624	0.784374	0.999993	no
C35D10.1	WBGene00016439	chrIII:4879708-4881461	q1	q2	OK	88.9072	80.142	-0.149742	0.454083	0.649769	0.999993	no
C35D10.10	WBGene00016446	chrIII:4859302-4861758	q1	q2	OK	106.384	113.831	0.0976101	-0.264861	0.791117	0.999993	no
C35D10.11	WBGene00016447	chrIII:4868297-4868733	q1	q2	OK	0.218128	0.370851	0.765667	-0.552289	0.58075	0.999993	no
C35D10.12	WBGene00016448	chrIII:4872530-4874715	q1	q2	OK	4.76754	4.50379	-0.0821068	0.139189	0.889301	0.999993	no
C35D10.13	WBGene00016449	chrIII:4877680-4878274	q1	q2	OK	250.987	222.844	-0.171582	0.508743	0.610932	0.999993	no
C35D10.17	WBGene00016452	chrIII:4867025-4867433	q1	q2	OK	89.3987	92.337	0.046654	-0.102982	0.917977	0.999993	no
C35D10.2	WBGene00016440	chrIII:4870741-4872013	q1	q2	OK	0.67661	0.890101	0.395643	-0.544723	0.585944	0.999993	no
C35D10.3	WBGene00016441	chrIII:4869010-4870060	q1	q2	OK	0.203623	0.341051	0.744091	-0.696025	0.486413	0.999993	no
C35D10.5	WBGene00016442	chrIII:4862521-4863239	q1	q2	OK	37.9971	35.7904	-0.0863181	0.187687	0.851122	0.999993	no
C35D10.6	WBGene00016443	chrIII:4859302-4861758	q1	q2	OK	92.0379	87.3912	-0.07474	0.17153	0.863807	0.999993	no
C35D10.7	WBGene00016444	chrIII:4856156-4859197	q1	q2	OK	40.1819	39.4268	-0.0273707	0.0809984	0.935443	0.999993	no
C35D10.8	WBGene00016445	chrIII:4855290-4856036	q1	q2	OK	8.18293	6.05557	-0.434355	0.679148	0.497044	0.999993	no
C35D6.3	WBGene00007960	chrIV:16347135-16347398	q1	q2	OK	29.8192	65.3034	1.13091	-1.68204	0.0925606	0.999993	no
C35D6.4	WBGene00007961	chrIV:16350957-16351569	q1	q2	OK	39.8402	38.8821	-0.0351191	0.0787466	0.937234	0.999993	no
C35E7.1	WBGene00016453	chrI:10846766-10850093	q1	q2	OK	325.713	370.896	0.187414	-0.755138	0.450166	0.999993	no
C35E7.10	WBGene00016462	chrI:10810690-10812846	q1	q2	OK	2.51791	3.05515	0.279015	-0.395361	0.692576	0.999993	no
C35E7.11	WBGene00016463	chrI:10844760-10845911	q1	q2	OK	17.0651	24.3719	0.514171	-1.01814	0.308611	0.999993	no
C35E7.2	WBGene00016454	chrI:10841102-10844636	q1	q2	OK	3.88165	3.39081	-0.19504	0.324098	0.745864	0.999993	no
C35E7.3	WBGene00016455	chrI:10836974-10838866	q1	q2	OK	53.176	63.1565	0.248155	-0.775575	0.438	0.999993	no
C35E7.4	WBGene00016456	chrI:10831889-10834801	q1	q2	OK	12.0107	11.7998	-0.0255651	0.0619524	0.950601	0.999993	no
C35E7.5	WBGene00016457	chrI:10823346-10828443	q1	q2	OK	609.524	680.922	0.159807	-0.532231	0.594566	0.999993	no
C35E7.6	WBGene00016458	chrI:10817348-10819098	q1	q2	OK	190.178	209.391	0.138846	-0.518709	0.603964	0.999993	no
C35E7.7	WBGene00016459	chrI:10813803-10814876	q1	q2	OK	0.929381	0.773193	-0.265442	0.273978	0.784102	0.999993	no
C35E7.8	WBGene00016460	chrI:10808595-10810373	q1	q2	OK	15.4731	16.647	0.105508	-0.226783	0.820593	0.999993	no
C35E7.9	WBGene00016461	chrI:10806910-10808213	q1	q2	NOTEST	0.103912	0.0746932	-0.47631	0.375487	0.707299	1	no
C36A4.10	WBGene00007970	chrIII:3829861-3830217	q1	q2	OK	104.785	124.871	0.253001	-0.321885	0.74754	0.999993	no
C36A4.11	WBGene00044167	chrIII:3840576-3841067	q1	q2	OK	1.38013	2.32516	0.752521	-0.962835	0.33563	0.999993	no
C36A4.4	WBGene00007965	chrIII:3841243-3843598	q1	q2	OK	42.3015	32.234	-0.392125	1.16645	0.243431	0.999993	no
C36A4.5	WBGene00007966	chrIII:3844256-3848244	q1	q2	OK	3.81781	2.79833	-0.448182	0.905733	0.365077	0.999993	no
C36A4.9	WBGene00007969	chrIII:3864017-3866812	q1	q2	OK	53.2653	39.4512	-0.433127	1.36179	0.173263	0.999993	no
C36B1.11	WBGene00007978	chrI:8755906-8757564	q1	q2	OK	44.7842	24.2638	-0.884183	2.33041	0.0197847	0.999993	no
C36B1.13	WBGene00044120	chrI:8730923-8731617	q1	q2	OK	0.3626	0.761902	1.07123	-1.06531	0.286734	0.999993	no
C36B1.14	WBGene00044614	chrI:8730152-8730915	q1	q2	OK	226.029	251.627	0.154779	-0.47167	0.637162	0.999993	no
C36B1.6	WBGene00007973	chrI:8732239-8733428	q1	q2	OK	0.35344	0.662449	0.906344	-0.57472	0.565481	0.999993	no
C36B1.8	WBGene00007975	chrI:8737065-8742530	q1	q2	OK	29.5933	26.5927	-0.154236	0.445575	0.655904	0.999993	no
C36B1.9	WBGene00007976	chrI:8743842-8746919	q1	q2	OK	15.848	23.9484	0.595623	-1.56977	0.116468	0.999993	no
C36B7.1	WBGene00016464	chrX:7112845-7114820	q1	q2	OK	0.98739	1.20827	0.291254	-0.429617	0.667474	0.999993	no
C36B7.2	WBGene00016465	chrX:7104815-7108393	q1	q2	OK	0.849222	0.656005	-0.372436	0.535842	0.592068	0.999993	no
C36B7.3	WBGene00016466	chrX:7101733-7102073	q1	q2	OK	2.6926	3.2802	0.284787	-0.340958	0.733135	0.999993	no
C36B7.4	WBGene00016467	chrX:7085629-7088050	q1	q2	NOTEST	0.224514	0.10441	-1.10454	0.552618	0.580525	1	no
C36B7.5	WBGene00016468	chrX:7089184-7096294	q1	q2	OK	0.795985	0.884633	0.152337	-0.230462	0.817733	0.999993	no
C36B7.6	WBGene00016469	chrX:7097419-7100297	q1	q2	OK	69.8919	65.2385	-0.0994016	0.348963	0.727117	0.999993	no
C36B7.8	WBGene00044576	chrX:7126607-7127360	q1	q2	OK	2.92651	2.12117	-0.464321	0.505491	0.613214	0.999993	no
C36C5.12	WBGene00016481	chrV:3158446-3159418	q1	q2	NOTEST	0.0159979	0.0229576	0.521086	-0.13735	0.890754	1	no
C36C5.14	WBGene00016483	chrV:3164715-3165513	q1	q2	NOTEST	0	0.0520826	1.79769e+308	1.79769e+308	0.211857	1	no
C36C5.15	WBGene00016484	chrV:3167965-3168748	q1	q2	NOTEST	0	0.0228521	1.79769e+308	1.79769e+308	0.296723	1	no
C36C5.4	WBGene00016473	chrV:3166738-3167266	q1	q2	NOTEST	0.041297	0.07171	0.796138	-0.273244	0.784666	1	no
C36C5.5	WBGene00016474	chrV:3157092-3157806	q1	q2	NOTEST	0	0	0	0	1	1	no
C36C9.1	WBGene00016485	chrX:1682950-1686378	q1	q2	OK	16.3724	0.604008	-4.76055	10.1307	0	0	yes
C36C9.4	WBGene00016487	chrX:1692132-1696974	q1	q2	OK	0.343765	0.511073	0.572106	-0.81039	0.417716	0.999993	no
C36C9.5	WBGene00016488	chrX:1699782-1703933	q1	q2	NOTEST	0.178143	0.18087	0.0219167	-0.0243214	0.980596	1	no
C36C9.6	WBGene00044560	chrX:1690033-1691507	q1	q2	OK	0.619783	0.050089	-3.6292	1.2933	0.195909	0.999993	no
C36E6.1	WBGene00016489	chrX:17434371-17438007	q1	q2	OK	27.8194	26.1064	-0.0916888	0.257987	0.796417	0.999993	no
C36E6.2	WBGene00016490	chrX:17452317-17456520	q1	q2	OK	57.1019	58.1721	0.0267888	-0.0588689	0.953057	0.999993	no
C36E6.8	WBGene00044683	chrX:17438656-17439595	q1	q2	OK	0.82645	0.530062	-0.640765	0.551122	0.58155	0.999993	no
C36E8.1	WBGene00007980	chrIII:3999277-4004123	q1	q2	OK	107.391	99.6931	-0.107306	0.407496	0.683643	0.999993	no
C36E8.4	WBGene00007983	chrIII:4012315-4015742	q1	q2	OK	20.2803	25.4402	0.32703	-0.864418	0.387359	0.999993	no
C36E8.6	WBGene00044230	chrIII:3988038-3988555	q1	q2	NOTEST	0.0921903	0	-1.79769e+308	-1.79769e+308	0.303748	1	no
C36F7.2	WBGene00007985	chrI:9544739-9558088	q1	q2	OK	20.7636	21.1478	0.0264489	-0.0604297	0.951813	0.999993	no
C36F7.5	WBGene00007986	chrI:9574794-9576016	q1	q2	OK	0.253702	0.488965	0.946598	-1.15889	0.246502	0.999993	no
C36H8.1	WBGene00007987	chrIV:12743070-12744715	q1	q2	NOTEST	0.00779334	0.0402989	2.37043	-0.808926	0.418558	1	no
C37A2.6	WBGene00016492	chrI:6788083-6788987	q1	q2	OK	3.03976	2.77165	-0.133217	0.200752	0.840893	0.999993	no
C37A2.7	WBGene00016493	chrI:6789060-6789741	q1	q2	OK	382.369	320.387	-0.255147	0.833002	0.404843	0.999993	no
C37A2.8	WBGene00016494	chrI:6798248-6799629	q1	q2	OK	25.7904	23.207	-0.152273	0.351487	0.725223	0.999993	no
C37A5.1	WBGene00007988	chrI:14158497-14161706	q1	q2	OK	1.72778	1.91352	0.147313	-0.235299	0.813976	0.999993	no
C37A5.11	WBGene00077520	chrI:14171851-14172774	q1	q2	OK	11.1799	15.7213	0.491812	-0.613997	0.539217	0.999993	no
C37A5.7	WBGene00007991	chrI:14163434-14168285	q1	q2	OK	9.99702	12.625	0.336715	-0.743526	0.457164	0.999993	no
C37C3.1	WBGene00016495	chrV:7731614-8316095	q1	q2	OK	31.5356	32.9804	0.0646275	-0.0258088	0.97941	0.999993	no
C37C3.10	WBGene00016502	chrV:7731614-8316095	q1	q2	NOTEST	0	0	0	0	1	1	no
C37C3.11	WBGene00016503	chrV:7731614-8316095	q1	q2	OK	1.13493	1.46644	0.369706	-0.0127607	0.989819	0.999993	no
C37C3.12	WBGene00016504	chrV:7731614-8316095	q1	q2	OK	1.71179	2.65032	0.630664	-0.0345028	0.972476	0.999993	no
C37C3.2	WBGene00016496	chrV:7731614-8316095	q1	q2	OK	171.785	193.264	0.169971	-0.14593	0.883976	0.999993	no
C37C3.7	WBGene00016499	chrV:7731614-8316095	q1	q2	OK	5.30428	6.27662	0.242829	-0.0345996	0.972399	0.999993	no
C37C3.9	WBGene00016501	chrV:7731614-8316095	q1	q2	OK	81.2339	69.9499	-0.215759	0.112703	0.910266	0.999993	no
C37E2.1	WBGene00007993	chrX:14170793-14173994	q1	q2	OK	45.6358	40.1018	-0.186497	0.584499	0.558884	0.999993	no
C37E2.2	WBGene00007994	chrX:14175980-14178402	q1	q2	OK	17.8646	20.1211	0.171603	-0.316818	0.751382	0.999993	no
C37E2.3	WBGene00007995	chrX:14178918-14181636	q1	q2	OK	0.295081	0.342786	0.216196	-0.21915	0.826534	0.999993	no
C37H5.13	WBGene00016511	chrV:4855310-4862951	q1	q2	OK	48.5718	61.3336	0.336559	-0.385537	0.69984	0.999993	no
C37H5.14	WBGene00045308	chrV:4827345-4836007	q1	q2	OK	1.75583	1.97327	0.168436	-0.0602215	0.951979	0.999993	no
C37H5.2	WBGene00016506	chrV:4847725-4849622	q1	q2	OK	1.31388	5.32728	2.01956	-3.14307	0.00167185	0.883513	no
C37H5.3	WBGene00016507	chrV:4844670-4846939	q1	q2	OK	10.5635	28.6475	1.43932	-2.53909	0.0111141	0.999993	no
C37H5.5	WBGene00016508	chrV:4827345-4836007	q1	q2	OK	76.0383	79.0155	0.0554107	-0.201486	0.840319	0.999993	no
C37H5.6	WBGene00016509	chrV:4818751-4823330	q1	q2	OK	142.132	163.698	0.203804	-0.639785	0.522312	0.999993	no
C38C10.2	WBGene00008000	chrIII:9385578-9390025	q1	q2	OK	207.606	212.591	0.0342338	-0.132634	0.894483	0.999993	no
C38C10.3	WBGene00008001	chrIII:9384087-9385513	q1	q2	NOTEST	0.0324738	0.0654677	1.01151	-0.502649	0.615211	1	no
C38C10.6	WBGene00008002	chrIII:9394061-9406557	q1	q2	OK	21.5623	27.7278	0.36282	-0.0661333	0.947272	0.999993	no
C38C3.10	WBGene00045390	chrV:1494794-1495446	q1	q2	NOTEST	0.188738	0.174178	-0.115821	0.0848197	0.932405	1	no
C38C3.3	WBGene00016512	chrV:1496172-1497942	q1	q2	NOTEST	0.157672	0.116049	-0.442194	0.343242	0.731416	1	no
C38C3.4	WBGene00016513	chrV:1482043-1483053	q1	q2	OK	2.74073	3.93391	0.521402	-0.512411	0.608364	0.999993	no
C38C3.6	WBGene00016514	chrV:1485034-1485658	q1	q2	NOTEST	0.187688	0.230748	0.297977	-0.172335	0.863174	1	no
C38C3.7	WBGene00016515	chrV:1501419-1504299	q1	q2	NOTEST	0.00660778	0.0362479	2.45566	-0.987409	0.323442	1	no
C38C3.8	WBGene00016516	chrV:1504697-1505310	q1	q2	NOTEST	0.0113033	0	-1.79769e+308	-1.79769e+308	0.350037	1	no
C38C5.1	WBGene00016518	chrX:5558985-5561295	q1	q2	OK	1.34257	4.0546	1.59457	-1.10258	0.270208	0.999993	no
C38C6.3	WBGene00007996	chrII:14633108-14634579	q1	q2	OK	9.46198	12.3916	0.389144	-0.733222	0.463423	0.999993	no
C38C6.5	WBGene00007998	chrII:14630477-14632561	q1	q2	NOTEST	0.0122736	0.0590584	2.26658	-1.04631	0.295416	1	no
C38D4.1	WBGene00008003	chrIII:4783161-4785227	q1	q2	OK	1.20818	3.49737	1.53344	-1.2057	0.227933	0.999993	no
C38D4.4	WBGene00008005	chrIII:4793050-4795363	q1	q2	OK	36.7259	32.3464	-0.18319	0.542632	0.587383	0.999993	no
C38D4.7	WBGene00008007	chrIII:4809994-4811126	q1	q2	OK	0.932383	1.33809	0.521177	-0.745493	0.455974	0.999993	no
C38D9.2	WBGene00008010	chrV:17566412-17571577	q1	q2	OK	0.90535	4.10157	2.17963	-3.32822	0.000874025	0.587861	no
C38D9.5	WBGene00008013	chrV:17586825-17591949	q1	q2	NOTEST	0.167944	0.232491	0.469195	-0.658972	0.509914	1	no
C38D9.8	WBGene00008016	chrV:17551479-17552790	q1	q2	OK	26.08	33.445	0.358847	-0.873842	0.382205	0.999993	no
C38H2.2	WBGene00008019	chrIII:10381678-10385215	q1	q2	OK	22.2952	24.029	0.108041	-0.289313	0.772342	0.999993	no
C38H2.3	WBGene00008020	chrIII:10385532-10386478	q1	q2	OK	1.26386	1.2753	0.0129978	-0.0136336	0.989122	0.999993	no
C39B10.1	WBGene00008021	chrX:10460485-10463520	q1	q2	OK	2.14395	2.10736	-0.0248368	0.0418349	0.96663	0.999993	no
C39B10.3	WBGene00008023	chrX:10443250-10444614	q1	q2	OK	1.73375	1.95102	0.170332	-0.236829	0.812789	0.999993	no
C39B10.4	WBGene00008024	chrX:10444944-10445936	q1	q2	NOTEST	0.022239	0.143951	2.69441	-0.934806	0.349888	1	no
C39B10.5	WBGene00008025	chrX:10447290-10447662	q1	q2	OK	0.903055	0.94489	0.0653322	-0.0560285	0.955319	0.999993	no
C39B5.10	WBGene00016528	chrIII:2238956-2240162	q1	q2	OK	0.5764	0.7306	0.342011	-0.398059	0.690587	0.999993	no
C39B5.2	WBGene00016520	chrIII:2234871-2236971	q1	q2	OK	189.793	204.718	0.109212	-0.405352	0.685219	0.999993	no
C39B5.5	WBGene00016523	chrIII:2208259-2217085	q1	q2	NOTEST	0.124745	0.0998833	-0.320665	0.301041	0.763383	1	no
C39D10.1	WBGene00016529	chrX:7906915-7907071	q1	q2	OK	0	0.927939	1.79769e+308	1.79769e+308	0.285806	0.999993	no
C39D10.11	WBGene00043983	chrX:7903274-7905418	q1	q2	OK	3.64575	3.85361	0.0799941	-0.136562	0.891377	0.999993	no
C39D10.2	WBGene00016530	chrX:7888665-7889595	q1	q2	OK	0.627224	0.555438	-0.175355	0.195441	0.845047	0.999993	no
C39D10.3	WBGene00016531	chrX:7884239-7887430	q1	q2	OK	10.6599	10.5888	-0.0096493	0.0134223	0.989291	0.999993	no
C39D10.5	WBGene00016532	chrX:7890361-7892348	q1	q2	OK	2.40461	2.33227	-0.0440666	0.0667837	0.946754	0.999993	no
C39D10.6	WBGene00016533	chrX:7896243-7897700	q1	q2	OK	3.76467	5.34189	0.504827	-0.743637	0.457096	0.999993	no
C39D10.7	WBGene00016534	chrX:7907911-7914076	q1	q2	NOTEST	0.110863	0.176737	0.672819	-0.89979	0.368232	1	no
C39D10.8	WBGene00016535	chrX:7879722-7880869	q1	q2	OK	1.76676	1.75403	-0.0104302	0.0103304	0.991758	0.999993	no
C39D10.9	WBGene00016536	chrX:7901582-7901942	q1	q2	NOTEST	0.0990207	0.193304	0.965068	-0.395217	0.692683	1	no
C39E6.2	WBGene00016537	chrX:4754647-4755130	q1	q2	NOTEST	0.209281	0.172507	-0.278781	0.175684	0.860542	1	no
C39E9.10	WBGene00008033	chrIV:13086980-13089581	q1	q2	OK	10.1675	11.9526	0.233365	-0.515017	0.606541	0.999993	no
C39E9.11	WBGene00008034	chrIV:13091163-13093820	q1	q2	OK	100.138	99.064	-0.0155513	0.0538447	0.957059	0.999993	no
C39E9.12	WBGene00008035	chrIV:13093982-13095467	q1	q2	OK	101.359	97.4373	-0.0569345	0.196793	0.843989	0.999993	no
C39E9.7	WBGene00008031	chrIV:13072674-13076716	q1	q2	NOTEST	0.111691	0.107369	-0.0569377	0.0527841	0.957904	1	no
C39E9.8	WBGene00008032	chrIV:13079455-13082755	q1	q2	OK	3.64054	4.24419	0.221334	-0.278427	0.780685	0.999993	no
C39F7.1	WBGene00016538	chrV:1260109-1262588	q1	q2	OK	0.999708	0.97701	-0.0331334	0.0453364	0.963839	0.999993	no
C39F7.2	WBGene00016539	chrV:1223908-1235446	q1	q2	OK	44.0777	46.1025	0.0647938	-0.192231	0.847561	0.999993	no
C39F7.5	WBGene00016540	chrV:1264773-1270105	q1	q2	OK	12.2331	14.4436	0.23964	-0.599836	0.548615	0.999993	no
C39H7.1	WBGene00016541	chrIV:5631894-5633359	q1	q2	NOTEST	0.0541375	0.068392	0.337198	-0.219918	0.825935	1	no
C39H7.4	WBGene00016542	chrIV:5612019-5614597	q1	q2	OK	11.9822	13.5936	0.182037	-0.381501	0.702831	0.999993	no
C40A11.10	WBGene00016553	chrII:2136558-2137305	q1	q2	OK	115.281	333.297	1.53165	-3.89948	9.64014e-05	0.0839089	no
C40A11.2	WBGene00016545	chrII:2146967-2148780	q1	q2	OK	86.3777	108.039	0.322822	-0.910679	0.362465	0.999993	no
C40A11.3	WBGene00016546	chrII:2141134-2143046	q1	q2	OK	45.7504	65.4489	0.516584	-1.30844	0.190725	0.999993	no
C40A11.4	WBGene00016547	chrII:2137329-2138956	q1	q2	OK	65.1511	81.0597	0.315195	-0.891194	0.372825	0.999993	no
C40A11.5	WBGene00016548	chrII:2133670-2135709	q1	q2	NOTEST	0.146463	0.216872	0.566312	-0.523359	0.600724	1	no
C40A11.6	WBGene00016549	chrII:2144362-2145587	q1	q2	OK	41.6765	38.2219	-0.124835	0.302744	0.762085	0.999993	no
C40A11.7	WBGene00016550	chrII:2148810-2150315	q1	q2	OK	18.3243	21.942	0.259937	-0.514985	0.606564	0.999993	no
C40A11.8	WBGene00016551	chrII:2150556-2151295	q1	q2	OK	0.50047	0.665799	0.411803	-0.503996	0.614264	0.999993	no
C40C9.3	WBGene00008036	chrX:13647547-13648264	q1	q2	NOTEST	0.0177495	0.0890599	2.327	-0.739748	0.459453	1	no
C40C9.4	WBGene00008037	chrX:13651177-13651667	q1	q2	NOTEST	0.112272	0	-1.79769e+308	-1.79769e+308	0.350037	1	no
C40D2.4	WBGene00016557	chrII:1999747-2000825	q1	q2	NOTEST	0.0943289	0.140916	0.579065	-0.351565	0.725164	1	no
C40H1.2	WBGene00008038	chrIII:9317960-9319188	q1	q2	NOTEST	0.0517378	0.0352068	-0.555365	0.198002	0.843044	1	no
C40H1.3	WBGene00008039	chrIII:9327223-9329283	q1	q2	NOTEST	0.210568	0.231958	0.139573	-0.156243	0.875842	1	no
C40H1.6	WBGene00008041	chrIII:9331430-9332168	q1	q2	OK	177.657	217.289	0.290519	-0.899138	0.368579	0.999993	no
C40H1.7	WBGene00008042	chrIII:9324964-9327052	q1	q2	OK	0.316421	0.415484	0.392949	-0.477018	0.633349	0.999993	no
C40H1.8	WBGene00008043	chrIII:9314633-9317078	q1	q2	NOTEST	0.24627	0.234327	-0.0717228	0.0738405	0.941137	1	no
C40H1.9	WBGene00008044	chrIII:9319956-9321580	q1	q2	OK	1.63059	1.88335	0.207913	-0.30772	0.758296	0.999993	no
C40H5.2	WBGene00008045	chrX:11753495-11756475	q1	q2	OK	1.76762	1.86175	0.0748523	-0.104929	0.916432	0.999993	no
C40H5.3	C40H5.3	chrX:11759194-11761000	q1	q2	OK	0.974057	1.19168	0.290917	-0.359326	0.719351	0.999993	no
C40H5.7	WBGene00008049	chrX:11746273-11746866	q1	q2	OK	0.806359	0.88198	0.129324	-0.102964	0.917991	0.999993	no
C41A3.1	WBGene00016558	chrX:5406595-5441886	q1	q2	OK	1.92386	2.32856	0.275434	-0.78313	0.433551	0.999993	no
C41A3.2	WBGene00016559	chrX:5406595-5441886	q1	q2	OK	0.981019	1.24196	0.340269	-0.128907	0.897431	0.999993	no
C41C4.1	WBGene00008050	chrII:8105561-8106891	q1	q2	OK	1.7113	2.93715	0.779324	-1.19258	0.233033	0.999993	no
C41C4.12	C41C4.12	chrII:8112213-8124788	q1	q2	OK	5.39444	7.60723	0.495897	-0.151263	0.879768	0.999993	no
C41C4.3	WBGene00008051	chrII:8108933-8112111	q1	q2	NOTEST	0.111486	0.141386	0.342776	-0.358102	0.720267	1	no
C41C4.9	WBGene00008054	chrII:8107599-8108884	q1	q2	NOTEST	0	0	0	0	1	1	no
C41D11.1	WBGene00016561	chrI:4457383-4458672	q1	q2	OK	20.408	14.8244	-0.461159	1.00984	0.31257	0.999993	no
C41D11.3	WBGene00016562	chrI:4428466-4431917	q1	q2	OK	46.6286	40.3571	-0.208394	0.549976	0.582336	0.999993	no
C41D11.4	C41D11.4	chrI:4441646-4444106	q1	q2	OK	50.1142	41.9233	-0.257467	0.703907	0.481491	0.999993	no
C41D11.5	WBGene00016564	chrI:4449939-4450926	q1	q2	OK	128.595	127.031	-0.0176612	0.0554814	0.955755	0.999993	no
C41D11.6	WBGene00016565	chrI:4460146-4462705	q1	q2	OK	2.76525	2.52035	-0.133781	0.252299	0.80081	0.999993	no
C41D11.7	WBGene00016566	chrI:4451199-4456806	q1	q2	OK	39.8336	30.2215	-0.398407	1.23076	0.218411	0.999993	no
C41D11.9	WBGene00016567	chrI:4448728-4449775	q1	q2	OK	76.3394	79.5342	0.0591485	-0.154062	0.877561	0.999993	no
C41D7.1	C41D7.1	chrII:356608-357458	q1	q2	OK	2.58023	0.72742	-1.82664	1.19035	0.23391	0.999993	no
C41G11.1	WBGene00016568	chrX:5714243-5720233	q1	q2	OK	1.44719	2.48011	0.777144	-0.634035	0.526058	0.999993	no
C41G6.12	WBGene00008058	chrV:15207070-15207764	q1	q2	NOTEST	0.0678984	0.119598	0.81675	-0.418626	0.67549	1	no
C41G6.16	WBGene00008060	chrV:15209567-15210760	q1	q2	NOTEST	0.0227955	0.0219918	-0.0517839	0.020721	0.983468	1	no
C41G6.6	WBGene00008057	chrV:15221664-15223097	q1	q2	NOTEST	0	0.01678	1.79769e+308	1.79769e+308	0.264219	1	no
C41G7.3	WBGene00008061	chrI:9517073-9518726	q1	q2	OK	14.2002	9.82633	-0.531189	1.15592	0.247716	0.999993	no
C41G7.6	WBGene00008063	chrI:9522569-9532823	q1	q2	NOTEST	0.179577	0.262256	0.546368	-0.141505	0.887471	1	no
C41G7.7	WBGene00008064	chrI:9533571-9536263	q1	q2	OK	1.12422	1.18717	0.0786066	-0.0957921	0.923686	0.999993	no
C41G7.8	WBGene00077525	chrI:9522569-9532823	q1	q2	OK	0.744524	0.912472	0.293462	-0.0985171	0.921522	0.999993	no
C41G7.9	WBGene00077771	chrI:9514992-9515851	q1	q2	OK	182.822	178.904	-0.0312493	0.103513	0.917556	0.999993	no
C41H7.1	WBGene00016571	chrII:3016070-3017474	q1	q2	OK	2.78293	3.58861	0.366823	-0.565617	0.571654	0.999993	no
C41H7.2	WBGene00016572	chrII:3014837-3015964	q1	q2	OK	1.68993	1.43726	-0.233644	0.294547	0.76834	0.999993	no
C41H7.3	WBGene00016573	chrII:3005848-3007500	q1	q2	OK	102.442	115.735	0.176023	-0.59975	0.548673	0.999993	no
C41H7.4	WBGene00016574	chrII:3003984-3005527	q1	q2	OK	60.1278	79.2074	0.397604	-1.20045	0.229964	0.999993	no
C41H7.5	WBGene00016575	chrII:3002520-3003803	q1	q2	OK	37.1745	45.3382	0.286414	-0.795984	0.426041	0.999993	no
C41H7.6	WBGene00016576	chrII:3000827-3002414	q1	q2	OK	165.241	210.961	0.352409	-1.30712	0.19117	0.999993	no
C41H7.9	WBGene00044370	chrII:3005848-3007500	q1	q2	OK	540.462	574.667	0.0885318	-0.163708	0.869961	0.999993	no
[truncated: 17,858 more rows]
