# Supplementary material for: Recruitment of mRNAs to P granules by condensation with intrinsically-disordered proteins
Source: eLife. 2020 Jan 24;9:e52896. doi: 10.7554/eLife.52896 (PMC7007223; doi:10.7554/eLife.52896)
Supplement: Supplementary file 4. [file elife-52896-supp4.xlsx]

## Sheet: Sheet1
Supplemet_table S4. Differential translation analysis.
This result was generated using Riborex R package. Samples were triplicates of N2 and meg3meg3 whole embryos. meg-3 and meg-4 were removed from the plot.

## Sheet: riborex_res_deseq2_N2vsmeg3meg4
	baseMean	log2FoldChange	lfcSE	stat	pvalue	padj
C53D6.6	263.948	1.70784	0.431439	3.95848	1.21e-07	0.00144728
F55C9.3	259.527	-1.70312	0.443797	-3.83762	2.89e-07	0.00172907
C35A5.4	9.93994	-7.41129	2.02406	-3.6616	9.83e-07	0.00327112
vit-6	13.8007	-6.97771	1.92207	-3.63031	1.21e-06	0.00327112
pqn-67	17.8265	-5.94063	1.65689	-3.58542	1.64e-06	0.00327112
unc-13	43.4039	-4.60947	1.28112	-3.59799	1.51e-06	0.00327112
gei-12	760.073	4.32657	1.24321	3.48017	3.28e-06	0.00560159
Y17G9B.8	120.951	-4.58281	1.35361	-3.38562	6.01e-06	0.00898025
C08F11.7	3.93873	-6.80446	2.04783	-3.32276	8.91e-06	0.00968516
dct-10	9.79651	-6.77444	2.02685	-3.34235	7.89e-06	0.00968516
sas-6	2418.19	0.944741	0.284081	3.3256	8.76e-06	0.00968516
tat-6	29.4982	-4.57912	1.40235	-3.26531	1.27e-05	0.0126511
C36C9.1	187.036	4.19955	1.29355	3.24654	1.42e-05	0.0130948
fer-1	11.1918	-5.32965	1.67932	-3.17369	2.21e-05	0.0181572
his-7	5470.09	-1.06409	0.336996	-3.15757	2.43e-05	0.0181572
W03C9.6	36.6121	1.71868	0.544038	3.15912	2.41e-05	0.0181572
T16H12.2	14.2606	2.96943	0.944839	3.14279	2.65e-05	0.0186512
T24C4.5	19.117	-3.97419	1.28243	-3.09896	3.43e-05	0.022783
F57F5.1	9.33404	-6.37584	2.07315	-3.07544	3.93e-05	0.0247455
C26B2.8	16.3399	-4.0858	1.33799	-3.05368	4.46e-05	0.0262561
spsb-2	149.719	-2.88078	0.945197	-3.04781	4.61e-05	0.0262561
clec-43	53.1196	-5.31751	1.7811	-2.98552	6.57e-05	0.0357252
clc-3	20.403	-4.34308	1.47774	-2.939	8.53e-05	0.0410942
nos-2	401.099	-2.16534	0.734625	-2.94754	8.13e-05	0.0410942
his-67	20128.7	-0.899542	0.30621	-2.93767	8.59e-05	0.0410942
nas-38	3.05449	-6.12005	2.11613	-2.8921	0.000110501	0.0489272
nhr-27	29.4514	-2.56063	0.883946	-2.89682	0.000107676	0.0489272
F43C11.8	7.67212	-6.80527	2.37747	-2.8624	0.000129925	0.0517751
F54C1.6	6.69946	-4.63847	1.61797	-2.86685	0.000126826	0.0517751
oac-55	12.5901	-4.59649	1.60237	-2.86855	0.000125654	0.0517751
math-45	12.9084	-4.87743	1.71234	-2.84839	0.000140168	0.0523659
Y82E9BR.4	13.914	-3.74587	1.31368	-2.85143	0.000137885	0.0523659
mec-17	4.67509	4.90787	1.72853	2.83934	0.000147189	0.0533224
F14D7.3	7.58159	-7.13177	2.52557	-2.82383	0.000159989	0.0562551
K02G10.5	16.9455	2.73307	0.973547	2.80733	0.000174747	0.0596887
his-8	1010.85	-0.989353	0.353431	-2.79928	0.000182401	0.0605724
Y50D4C.2	12.2565	-3.84703	1.37924	-2.78924	0.000192397	0.062165
F59F5.7	23.0897	-2.56144	0.920547	-2.78252	0.000199376	0.0627246
F59H6.2	6.79618	-4.4856	1.62448	-2.76126	0.000223038	0.0683698
F54D5.2	98.942	-2.45167	0.891052	-2.75144	0.000234835	0.0701862
C06B8.2	7.3955	4.33917	1.5811	2.74441	0.000243639	0.0710414
mrp-3	37.424	-2.85532	1.04514	-2.73201	0.000259924	0.0739855
F13H6.5	6.76959	-4.20157	1.54463	-2.72012	0.00027649	0.0768706
glb-24	10.6871	-5.06969	1.88583	-2.6883	0.000325819	0.0870679
ptd-2	7.90725	-4.69476	1.74711	-2.68716	0.000327733	0.0870679
F23A7.4	526.165	-3.60571	1.34613	-2.67857	0.000342482	0.0881714
hum-9	52.5745	-3.24157	1.21335	-2.67158	0.00035494	0.0881714
dig-1	266.926	-1.92295	0.719909	-2.67111	0.000355805	0.0881714
F08C6.5	7.91286	3.728	1.39727	2.66805	0.000361389	0.0881714
C15A11.7	4.75202	-5.82482	2.21446	-2.63035	0.000437462	0.0986766
Y116A8B.1	205.345	-2.03157	0.771165	-2.63442	0.000428589	0.0986766
F59A3.12	125.115	-1.77082	0.673121	-2.63076	0.000436565	0.0986766
pmk-2	267.073	-1.39829	0.530724	-2.63468	0.000428023	0.0986766
Y32F6A.4	10.5999	-5.43196	2.08394	-2.60657	0.000492882	0.109119
sul-2	14.3915	3.08707	1.19011	2.59394	0.00052491	0.114096
srap-1	8.64148	-5.20078	2.01963	-2.57512	0.000576276	0.117362
R05H5.4	37.6103	-3.96053	1.53741	-2.5761	0.000573478	0.117362
B0244.10	14.1941	-3.52809	1.37061	-2.57409	0.000579204	0.117362
cdh-1	215.21	-1.90343	0.738477	-2.57751	0.0005695	0.117362
K09D9.12	6.00973	-5.66389	2.2047	-2.569	0.000593941	0.117702
Y105C5B.15	6.16542	-4.30688	1.67795	-2.56675	0.00060057	0.117702
gopc-1	41.3841	-4.84343	1.89012	-2.56249	0.000613291	0.118256
W05H12.1	18.6395	-2.36004	0.925034	-2.55131	0.00064794	0.122954
C54D10.10	7.92927	-3.94299	1.55234	-2.54003	0.000684681	0.127896
B0507.10	13.0104	-3.34901	1.33798	-2.50304	0.000819313	0.149211
Y51H7C.10	44.6805	-1.37858	0.551625	-2.49912	0.000834938	0.149211
C24H12.8	22.6251	2.22483	0.89036	2.4988	0.000836232	0.149211
ddo-3	7.47206	-5.04872	2.02693	-2.49082	0.000868921	0.152764
R08F11.7	5.33269	-5.51843	2.23284	-2.47148	0.000953159	0.156096
lipl-6	12.6287	-4.90322	1.97919	-2.47739	0.000926666	0.156096
C27B7.7	3.02475	-4.59679	1.85652	-2.47603	0.000932691	0.156096
pqn-36	12.1583	-4.29313	1.73122	-2.47983	0.000915892	0.156096
clec-12	94.839	-2.92724	1.18363	-2.47311	0.000945809	0.156096
K07H8.12	3.96179	4.82859	1.95673	2.46768	0.000970608	0.156806
gcy-12	56.8789	-2.88734	1.17266	-2.46221	0.000996161	0.158788
glb-14	8.57959	-2.86085	1.16525	-2.45513	0.00103021	0.161953
T19C3.3	3.4048	4.92545	2.00833	2.45251	0.00104311	0.161953
F29G9.7	13.6478	-4.17827	1.70616	-2.44894	0.0010609	0.162603
asp-5	5.24493	-4.43951	1.81689	-2.44346	0.00108869	0.163696
C35A11.2	24.7159	-2.51343	1.02918	-2.44216	0.00109541	0.163696
clec-63	14.1072	-4.35777	1.78769	-2.43766	0.00111893	0.164541
C16A11.10	23.937	-2.20446	0.905014	-2.43583	0.0011286	0.164541
ZK816.4	5.24476	4.15765	1.70931	2.43235	0.00114721	0.16524
C50C3.2	5.44574	-4.42885	1.83861	-2.4088	0.00128098	0.176024
F57G12.2	17.9782	2.05726	0.852768	2.41245	0.00125935	0.176024
R05G6.5	7.23521	2.86438	1.1878	2.41149	0.00126502	0.176024
Y65B4BL.7	17.2552	3.74843	1.55473	2.41099	0.00126799	0.176024
trp-2	49.7407	-2.50347	1.0425	-2.40141	0.00132585	0.178514
T27A1.2	78.1253	1.61293	0.671798	2.40091	0.00132897	0.178514
F14D2.2	5.47959	3.69337	1.54283	2.39389	0.00137299	0.182379
lact-3	47.9981	-3.17262	1.3316	-2.38256	0.0014469	0.190084
Y77E11A.3	5.34513	-4.4187	1.86035	-2.37519	0.00149694	0.194119
fbxa-182	7.05493	-3.70207	1.56142	-2.37097	0.00152633	0.194119
xbx-6	523.066	1.06411	0.44837	2.37328	0.00151022	0.194119
his-6	7212.42	-0.754456	0.3193	-2.36285	0.00158437	0.197304
fbxb-61	207.583	0.874426	0.369987	2.3634	0.00158036	0.197304
R12E2.8	17.9207	-2.27266	0.963475	-2.35882	0.0016139	0.19891
mlt-9	25.7628	-2.07082	0.879075	-2.35568	0.00163723	0.199725
her-1	39.0794	-3.33368	1.42041	-2.34699	0.00170355	0.20366
F23F1.4	50.1811	1.40135	0.59653	2.34917	0.00168666	0.20366
B0034.5	3.61898	-4.49915	1.92029	-2.34295	0.00173518	0.204341
Y69H2.3	7.77442	-4.34205	1.85406	-2.34191	0.00174344	0.204341
rps-22	1679.89	-0.658246	0.282415	-2.33078	0.00183385	0.212852
ssq-4	5.13289	-3.94528	1.70096	-2.31944	0.00193036	0.221899
R11G1.1	28.794	-3.90388	1.68686	-2.31429	0.0019757	0.222803
W05B2.7	17.9353	-3.36628	1.45625	-2.3116	0.00199978	0.222803
T28D6.5	20.8619	-3.36284	1.45825	-2.30608	0.00205005	0.222803
T01D3.3	86.4349	-2.37205	1.02802	-2.30739	0.00203801	0.222803
cutl-10	26.422	-1.83193	0.791458	-2.31462	0.00197277	0.222803
his-61	23395.6	-0.669612	0.290257	-2.30696	0.00204195	0.222803
sek-4	26.4304	1.53247	0.665507	2.30271	0.00208133	0.224165
sma-10	10.5261	2.66506	1.16142	2.29466	0.00215778	0.230324
plc-1	76.6524	-3.73566	1.63244	-2.28839	0.00221908	0.23477
C08B6.4	3.68394	4.46457	1.95372	2.28516	0.0022512	0.23608
C35D10.3	5.21369	-5.26829	2.31093	-2.27973	0.00230636	0.237694
F59C6.14	2.58214	4.92262	2.15778	2.28134	0.0022899	0.237694
F14F9.3	2.4533	-5.82455	2.56001	-2.2752	0.00235321	0.24045
T16G12.1	10.1743	-2.84609	1.25493	-2.26793	0.00243041	0.244164
his-18	10707.8	-1.17852	0.519531	-2.26843	0.00242498	0.244164
clc-2	25.1844	-2.01479	0.889447	-2.26522	0.00245972	0.245049
hum-10	150.525	-4.51451	2.00181	-2.25522	0.00257079	0.249868
Y7A5A.1	27.2237	-1.7002	0.753503	-2.2564	0.00255742	0.249868
Y47H9B.2	58.416	-1.44717	0.64164	-2.25543	0.00256839	0.249868
dlc-2	4.4596	-3.7313	1.6577	-2.25088	0.0026203	0.252396
dhc-4	9.25192	-3.07243	1.36597	-2.24927	0.00263902	0.252396
E04F6.9	4.99033	-3.67452	1.63777	-2.24362	0.00270532	0.254662
C45G9.11	4.95158	3.22406	1.43619	2.24488	0.0026904	0.254662
sre-23	4.50498	-4.47355	1.99846	-2.23849	0.00276677	0.258412
twk-5	3.85663	-3.78388	1.70326	-2.22155	0.00297915	0.271876
dpf-7	908.733	0.470258	0.211515	2.22329	0.00295675	0.271876
glb-3	2.91098	4.43405	1.9958	2.22169	0.00297732	0.271876
BE10.4	9.84843	-3.27291	1.4754	-2.21833	0.00302127	0.273631
R11E3.1	20.2797	-2.91324	1.31488	-2.21559	0.00305733	0.274815
acy-3	40.345	-2.70776	1.22314	-2.21377	0.00308161	0.27493
F22G12.1	2.67728	-6.66344	3.01996	-2.20646	0.00318074	0.276204
C46A5.4	5.59113	-4.20704	1.91341	-2.19871	0.00328904	0.276204
clec-66	11.0473	-4.10812	1.86325	-2.20481	0.00320355	0.276204
gpa-9	13.908	-3.54387	1.60668	-2.20571	0.00319111	0.276204
Y55F3C.10	6.22817	-3.34088	1.51329	-2.20769	0.00316388	0.276204
VH15N14R.1	111.419	-3.23076	1.47008	-2.19767	0.00330382	0.276204
C35B8.4	10.1171	-2.83291	1.28823	-2.19907	0.00328397	0.276204
C26B9.1	187.459	0.738104	0.33566	2.19896	0.00328551	0.276204
npr-5	25.6774	1.80439	0.819096	2.2029	0.0032301	0.276204
cut-1	3.16077	-4.31374	1.96791	-2.19204	0.00338494	0.279083
hil-1	12.9598	-2.38408	1.08718	-2.1929	0.00337242	0.279083
cutl-8	36.3396	-1.49364	0.683773	-2.18442	0.00349767	0.282532
his-1	28070.5	-0.730158	0.334121	-2.18531	0.00348427	0.282532
R07G3.8	59.9292	1.29425	0.59183	2.18686	0.00346112	0.282532
Y51F10.2	1260.54	-1.13657	0.52469	-2.16618	0.0037813	0.302204
C26B9.3	93.7678	-0.933542	0.431092	-2.16553	0.00379177	0.302204
R07E4.1	23.5614	1.70933	0.790814	2.16148	0.0038577	0.304641
clec-90	28.1562	2.14021	0.990597	2.16053	0.00387332	0.304641
R09F10.8	372.21	-1.43991	0.668172	-2.155	0.00396534	0.309841
F14B6.2	25.4154	-2.5718	1.19652	-2.14939	0.00406059	0.314999
F59B2.3	1120.88	0.502127	0.233761	2.14803	0.00408405	0.314999
F53G2.1	225.324	0.88803	0.414515	2.14234	0.00418353	0.320603
C29F3.7	3.49595	-4.20412	1.9655	-2.13895	0.0042437	0.321098
Y105E8A.25	669.77	0.726239	0.339401	2.13977	0.00422911	0.321098
F17C8.7	5.61255	-5.09078	2.38403	-2.13537	0.00430823	0.32393
Y37E3.30	328.534	-1.58012	0.741339	-2.13145	0.0043799	0.32726
cutl-22	5.53687	-5.4848	2.58033	-2.12562	0.0044883	0.330656
Y47H9C.9	22.2507	-3.1311	1.47579	-2.12165	0.00456364	0.330656
F26G1.2	12.502	-2.03938	0.959573	-2.1253	0.00449426	0.330656
F55A11.7	67.7961	-1.63951	0.772528	-2.12226	0.00455186	0.330656
ZC247.1	98.0565	-1.51668	0.714181	-2.12367	0.00452519	0.330656
ztf-15	216.58	-1.54401	0.73012	-2.11474	0.00469742	0.337041
C30E1.9	18.0873	2.32447	1.09979	2.11356	0.00472049	0.337041
F31F6.2	9.56105	3.29389	1.55905	2.11276	0.00473633	0.337041
C16A3.5	1416.11	-0.656294	0.310927	-2.11077	0.00477582	0.33784
C08A9.3	3.02384	-4.82165	2.28746	-2.10786	0.00483399	0.337955
W04A8.9	49.9403	-2.01758	0.956612	-2.10909	0.00480938	0.337955
pde-5	3.99658	-3.62074	1.72162	-2.1031	0.0049307	0.34181
his-59	35779.3	-0.904395	0.430185	-2.10234	0.00494631	0.34181
M02B7.2	115.712	-0.813604	0.387461	-2.09984	0.00499799	0.343396
Y82E9BL.6	33.9483	1.93076	0.921421	2.09541	0.00509048	0.347753
clc-1	4.63327	-4.91232	2.36224	-2.07952	0.00543588	0.348917
Y52E8A.4	4.54669	-4.57245	2.20743	-2.0714	0.00562039	0.348917
M02F4.1	9.08468	-4.57019	2.19066	-2.08621	0.00528788	0.348917
fip-4	3.38833	-4.14197	2.00084	-2.07012	0.00564997	0.348917
T07H6.4	3.82985	-4.09331	1.96325	-2.08497	0.00531514	0.348917
C44H9.6	4.17098	-3.76213	1.82022	-2.06686	0.00572588	0.348917
T20G5.12	5.2597	-3.38495	1.63349	-2.07221	0.00560158	0.348917
M151.3	130.34	-2.86404	1.37013	-2.09035	0.00519826	0.348917
nlf-1	16.0912	-2.76572	1.3389	-2.06566	0.00575402	0.348917
catp-5	30.0603	-1.8787	0.907911	-2.06925	0.00566997	0.348917
F55C9.5	154.43	-1.6469	0.789739	-2.08537	0.00530629	0.348917
pgk-1	3699.1	-1.25728	0.60548	-2.0765	0.00550371	0.348917
rps-12	2341.16	-1.18483	0.573875	-2.06461	0.0057788	0.348917
C10B5.3	40.0848	-1.00839	0.488354	-2.06487	0.00577262	0.348917
C09G4.4	238.111	0.772308	0.371968	2.07627	0.00550888	0.348917
W09G3.7	84.493	1.07047	0.518343	2.06518	0.00576532	0.348917
F54D5.15	36.4108	1.27295	0.611957	2.08013	0.00542224	0.348917
T09F5.20	20.9888	1.893	0.913981	2.07116	0.00562591	0.348917
fbxb-39	11.0363	2.1392	1.03066	2.07555	0.00552527	0.348917
D1037.5	15.5042	2.70936	1.3086	2.07043	0.00564267	0.348917
dgn-2	6.65951	3.17976	1.5233	2.08742	0.00526164	0.348917
frpr-17	2.83774	3.91789	1.88743	2.07578	0.00552009	0.348917
F32H5.3	2.12585	4.12383	1.99427	2.06784	0.00570299	0.348917
Y108G3AL.3	124.872	-1.68668	0.818135	-2.06162	0.00585001	0.351442
his-3	14754.9	-0.736823	0.358146	-2.05733	0.00595341	0.355098
dct-11	9.2129	2.42601	1.1796	2.05663	0.00597028	0.355098
T05E11.2	4.33334	3.39089	1.65045	2.05453	0.00602183	0.356391
cdr-4	5.68208	3.0922	1.50816	2.05032	0.00612585	0.360761
Y6B3B.5	91.702	-1.04399	0.511077	-2.04273	0.00631769	0.370235
F49B2.3	183.431	-0.788633	0.387116	-2.0372	0.00646084	0.374948
ZK228.3	317.967	0.602288	0.295568	2.03773	0.00644695	0.374948
F49E12.12	1.87126	-5.41777	2.66267	-2.03471	0.0065262	0.376912
Y59C2A.1	5.45049	-3.62535	1.78389	-2.03227	0.00659094	0.377008
his-60	58761.1	-0.628783	0.309308	-2.03287	0.00657499	0.377008
Y59A8B.21	38.6875	-2.87827	1.4172	-2.03096	0.0066258	0.377197
C39B10.7	5.12197	2.93959	1.45003	2.02726	0.00672543	0.381055
K09F6.6	4.30552	-3.91639	1.93631	-2.0226	0.00685282	0.38498
Y53F4B.19	4.53471	-3.37723	1.66993	-2.02237	0.00685912	0.38498
C28G1.2	3.80694	-4.46178	2.21633	-2.01314	0.00711823	0.38613
pho-14	2.92359	-4.22639	2.09973	-2.01283	0.00712715	0.38613
C04G2.2	3.16357	-4.22043	2.09548	-2.01406	0.00709201	0.38613
acy-2	2.93076	-3.76081	1.87042	-2.01068	0.00718866	0.38613
cyp-13A1	7.98573	-2.76871	1.37471	-2.01403	0.00709292	0.38613
fbxb-14	17.244	-2.61769	1.29835	-2.01617	0.00703234	0.38613
him-4	32.2341	-2.56996	1.27846	-2.0102	0.00720259	0.38613
ptr-22	18.3843	-2.19914	1.0926	-2.01276	0.00712915	0.38613
R09F10.1	25.7317	1.82382	0.90396	2.01759	0.00699219	0.38613
R06B10.2	22.5439	2.02078	1.00491	2.01091	0.00718217	0.38613
tag-80	61.8279	-1.90332	0.948004	-2.00771	0.00727448	0.388243
T01C3.9	234.437	-0.946097	0.471687	-2.00578	0.00733108	0.389525
ZK930.2	9.22938	-3.30525	1.6509	-2.00209	0.0074398	0.391819
clk-2	180.754	-1.06606	0.532253	-2.00292	0.0074152	0.391819
C05D12.1	6.53918	-3.15413	1.57868	-1.99795	0.00756348	0.392834
F14D2.15	23.0791	-1.83627	0.919635	-1.99674	0.00760007	0.392834
abt-2	118.423	-1.54783	0.775478	-1.99597	0.00762337	0.392834
rpl-27	3617.47	-0.525175	0.26263	-1.99967	0.00751181	0.392834
F20C5.7	83.5108	3.2697	1.63699	1.99739	0.00758035	0.392834
F55H12.3	34.9408	-2.81107	1.41118	-1.99199	0.00774487	0.397382
F11D5.7	1.11852	-5.61083	2.83897	-1.97636	0.0082396	0.397573
C49G7.1	2.00593	-4.88419	2.46879	-1.97838	0.00817412	0.397573
T15B12.2	1.84831	-4.79277	2.43258	-1.97024	0.00844073	0.397573
mir-8191	4.17689	-4.31647	2.18089	-1.97923	0.00814672	0.397573
lev-1	5.60082	-3.96869	2.00325	-1.98112	0.00808596	0.397573
nhr-202	7.53484	-3.23474	1.63902	-1.97358	0.00833022	0.397573
F56C9.7	10.6177	-2.88604	1.46608	-1.96855	0.00849719	0.397573
F35B12.3	8.39371	-2.86223	1.44267	-1.98398	0.00799504	0.397573
F40H6.6	13.4429	-2.817	1.42559	-1.97602	0.0082505	0.397573
T02G6.2	12.3644	-2.62335	1.3225	-1.98363	0.00800616	0.397573
rgs-3	11.6725	-2.46802	1.24981	-1.97472	0.00829302	0.397573
C24G6.2	25.9101	-1.69534	0.859275	-1.97298	0.00834995	0.397573
hpo-15	56.4906	-1.60184	0.813166	-1.96988	0.00845273	0.397573
Y38H6C.16	149.623	-1.3953	0.70664	-1.97455	0.00829855	0.397573
bmy-1	372.383	-1.1306	0.570987	-1.98008	0.00811946	0.397573
fkb-3	429.603	-0.828122	0.419706	-1.9731	0.00834606	0.397573
rpl-13	4254.59	-0.528448	0.268279	-1.96977	0.00845642	0.397573
fog-3	9.27792	2.32804	1.18122	1.97088	0.00841959	0.397573
F13B6.1	12.2705	2.38897	1.21387	1.96806	0.00851348	0.397573
C29F9.2	7.16691	2.6631	1.34152	1.98513	0.00795867	0.397573
F48F7.3	8.29888	2.71022	1.36339	1.98785	0.00787322	0.397573
T04C4.3	4.78847	3.1856	1.60704	1.98228	0.0080491	0.397573
F28H7.4	4.55433	3.24247	1.6382	1.97929	0.00814479	0.397573
F36H5.10	23.093	-2.67092	1.35837	-1.96627	0.00857363	0.398824
F53B2.5	6.08454	-3.40892	1.73645	-1.96316	0.00867911	0.401408
cpg-7	10.1222	2.70967	1.38062	1.96265	0.00869632	0.401408
Y65B4A.7	2.90911	-3.42428	1.7492	-1.95763	0.00886922	0.404901
nape-1	14.9917	1.72378	0.880043	1.95875	0.00883047	0.404901
hpa-1	2.01642	5.09052	2.60052	1.9575	0.00887362	0.404901
Y43F8B.24	3.22118	-5.50632	2.8186	-1.95357	0.00901138	0.405004
F23F12.13	4.59884	-3.84434	1.96583	-1.95558	0.0089408	0.405004
mltn-9	18.7559	-1.80717	0.92429	-1.9552	0.00895389	0.405004
hlh-25	10.5817	2.14551	1.09782	1.95433	0.00898454	0.405004
arrd-28	19.859	-3.08172	1.58065	-1.94966	0.0091501	0.406652
F35D11.3	49.1069	-1.55872	0.799341	-1.95001	0.00913744	0.406652
orai-1	273.093	-0.799494	0.410053	-1.94973	0.00914735	0.406652
C09F12.2	19.9468	-2.98591	1.53613	-1.94379	0.00936181	0.411472
gly-10	253.97	-0.959615	0.493451	-1.9447	0.0093285	0.411472
mat-3	2354.23	0.468138	0.240748	1.94451	0.0093355	0.411472
flp-20	2.59819	-5.66583	2.93025	-1.93356	0.00974122	0.412373
R10E8.6	3.28846	-4.93823	2.55665	-1.93152	0.00981857	0.412373
Y54G2A.13	4.78518	-4.5586	2.35678	-1.93425	0.00971549	0.412373
dmsr-8	4.5142	-3.58957	1.85781	-1.93215	0.00979464	0.412373
F55H12.7	3.13902	-3.43805	1.78441	-1.92671	0.0100032	0.412373
B0511.2	6.72336	-2.90062	1.49534	-1.93977	0.00950945	0.412373
cyp-35C1	8.25949	-2.62325	1.35212	-1.9401	0.00949723	0.412373
F54H5.5	10.404	-2.39337	1.2349	-1.93811	0.00957078	0.412373
C32F10.4	31.6565	-1.46276	0.754963	-1.93752	0.0095927	0.412373
coh-3	111	-1.33885	0.693965	-1.92927	0.00990458	0.412373
apc-10	115.496	-1.10558	0.572657	-1.93062	0.00985311	0.412373
T22D1.3	898.238	0.487517	0.251776	1.93631	0.00963804	0.412373
csn-3	2382.61	0.530396	0.274398	1.93295	0.00976454	0.412373
Y105C5B.8	18.8296	1.55079	0.804734	1.92709	0.00998848	0.412373
ZK1098.6	11.5671	2.69578	1.39846	1.92767	0.00996608	0.412373
gcy-13	6.69712	2.96484	1.53627	1.9299	0.00988055	0.412373
R13H4.7	4.14176	3.35599	1.73572	1.93349	0.009744	0.412373
ZC395.5	3.50614	3.55728	1.83244	1.94128	0.00945359	0.412373
ubl-1	2142.62	-0.718293	0.373853	-1.92133	0.0102133	0.419587
sec-24.1	3435.9	0.504362	0.263007	1.91768	0.0103579	0.424071
aff-1	17.2324	-2.30863	1.20572	-1.91473	0.010476	0.424623
W10C8.5	46.3118	-0.993649	0.518962	-1.91468	0.0104779	0.424623
gly-2	13.7575	1.89528	0.989123	1.91612	0.0104201	0.424623
oig-3	19.8033	1.48023	0.775179	1.90953	0.0106873	0.431646
cah-5	20.8209	-2.17645	1.14157	-1.90654	0.0108107	0.43242
skr-17	302.194	-0.804763	0.422129	-1.90644	0.010815	0.43242
C06A6.7	2.77181	3.48993	1.8295	1.90758	0.0107676	0.43242
Y54G2A.37	4.35208	-5.24278	2.76698	-1.89476	0.0113086	0.43801
eat-2	3.64622	-4.39091	2.31774	-1.89447	0.0113212	0.43801
ZK1086.2	14.2358	-3.41043	1.79732	-1.89751	0.0111909	0.43801
acbp-4	7.57196	-3.34627	1.76595	-1.89489	0.0113033	0.43801
T19D7.7	5.45208	-3.0728	1.62052	-1.89618	0.0112479	0.43801
F11D11.21	9.8357	-2.7932	1.47389	-1.89512	0.0112935	0.43801
Y48G1A.2	87.5341	-1.57088	0.827257	-1.89891	0.0111313	0.43801
mua-3	366.245	-1.32911	0.700609	-1.89708	0.0112091	0.43801
rpl-19	4912.06	-0.434297	0.229175	-1.89504	0.0112967	0.43801
C08F8.15	330.98	1.43564	0.755672	1.89982	0.0110925	0.43801
F02E11.3	11.7254	-1.91395	1.01194	-1.89137	0.0114558	0.441787
T23F6.5	4.33379	-3.51387	1.85925	-1.88994	0.0115183	0.44225
M04B2.2	106.94	-0.92222	0.4881	-1.88941	0.0115418	0.44225
Y69H2.10	3.89398	-3.71588	1.97151	-1.88479	0.0117462	0.443887
grl-16	8.7175	-2.5499	1.3509	-1.88756	0.0116231	0.443887
mks-5	50.0288	-1.20824	0.6407	-1.88582	0.0117004	0.443887
C41H7.5	229.028	-0.820017	0.435195	-1.88425	0.0117701	0.443887
C25B8.8	5.75638	2.71978	1.44313	1.88464	0.0117531	0.443887
C50C3.5	9.64308	-3.23768	1.71951	-1.88291	0.0118304	0.444755
ubc-22	5.30816	2.44907	1.30223	1.88068	0.0119306	0.447117
T23G11.11	3.75484	3.09457	1.65	1.8755	0.012167	0.454553
F23A7.8	1240.69	-3.27962	1.75005	-1.87402	0.0122356	0.455329
C08B6.10	7.17854	-2.8235	1.50715	-1.8734	0.012264	0.455329
C27D8.2	18.369	-5.52438	2.96056	-1.86599	0.0126119	0.456309
T04G9.6	4.35703	-4.18746	2.24701	-1.86357	0.0127272	0.456309
T08G3.7	2.81282	-4.10766	2.19637	-1.87021	0.0124128	0.456309
Y43F8A.3	6.61389	-3.78001	2.03261	-1.85969	0.0129143	0.456309
T25G12.1	6.64535	-3.68372	1.98161	-1.85895	0.0129501	0.456309
col-84	14.1996	-3.2534	1.75212	-1.85683	0.0130536	0.456309
arrd-16	4.70309	-3.15423	1.69865	-1.85691	0.0130499	0.456309
F48C1.15	9.59261	-2.78498	1.49794	-1.8592	0.012938	0.456309
F16G10.6	25.3041	-1.74726	0.937718	-1.86331	0.0127398	0.456309
T27F6.8	22.5778	-1.35257	0.72515	-1.86522	0.0126483	0.456309
cyn-6	1419.26	-1.05829	0.56877	-1.86067	0.012867	0.456309
rpl-28	1565.37	-0.813523	0.434675	-1.87157	0.0123494	0.456309
fbxb-40	290.684	0.965289	0.519688	1.85744	0.013024	0.456309
fbxb-76	15.9799	1.70341	0.917375	1.85683	0.0130538	0.456309
nhr-183	9.69546	2.27973	1.22218	1.8653	0.0126448	0.456309
poml-3	6.88662	2.44177	1.30804	1.86673	0.0125767	0.456309
lys-1	7.6098	2.53521	1.35863	1.86601	0.012611	0.456309
C54C8.4	7.7861	2.75475	1.4833	1.85718	0.0130365	0.456309
ech-7	5.46544	2.81432	1.51234	1.86091	0.0128552	0.456309
F58G6.3	2.13616	4.22025	2.2647	1.86349	0.0127312	0.456309
H25P06.5	1.79918	-5.19435	2.81309	-1.84649	0.0135688	0.460674
C27D8.1	1.60641	-4.34785	2.35376	-1.84719	0.0135335	0.460674
B0207.2	2.83459	-4.00632	2.16601	-1.84963	0.0134108	0.460674
F13H6.4	8.33642	-2.76853	1.49525	-1.85155	0.0133146	0.460674
F12A10.8	40.1837	-2.33335	1.26454	-1.84521	0.0136338	0.460674
crb-1	447.291	-0.885818	0.479892	-1.84587	0.0136004	0.460674
rps-13	2576.38	-0.637279	0.345101	-1.84665	0.0135609	0.460674
his-68	6488.48	-0.596385	0.323034	-1.8462	0.0135837	0.460674
fkh-7	1402.74	0.49124	0.26606	1.84635	0.0135761	0.460674
dgk-1	225.645	0.950799	0.515089	1.84589	0.0135992	0.460674
fbxa-181	34.2527	1.45386	0.787969	1.84507	0.013641	0.460674
F31E3.2	13.4878	2.17726	1.17692	1.84997	0.0133937	0.460674
fbxc-16	15.2547	1.5227	0.825905	1.84368	0.0137122	0.461774
fshr-1	5.78987	-3.6203	1.96844	-1.83917	0.0139443	0.466465
scl-27	7.52761	-3.19362	1.7365	-1.83912	0.0139472	0.466465
ZC412.3	7.16727	-2.77143	1.50727	-1.8387	0.0139686	0.466465
H08M01.1	2.62683	-4.55278	2.49776	-1.82275	0.0148205	0.466651
snf-10	2.82473	-4.07963	2.23777	-1.82308	0.0148022	0.466651
F40F8.5	3.93773	-4.0529	2.2198	-1.82579	0.0146543	0.466651
C04G2.9	3.17064	-3.89804	2.13668	-1.82434	0.0147332	0.466651
C49C8.5	4.3621	-3.86574	2.11173	-1.83061	0.0143954	0.466651
K08D9.4	3.33435	-3.33924	1.82996	-1.82476	0.0147106	0.466651
Y95B8A.4	3.78226	-3.32045	1.82185	-1.82257	0.01483	0.466651
T23B12.8	3.61509	-3.31667	1.80991	-1.83251	0.0142941	0.466651
nhr-262	2.7741	-3.29021	1.80161	-1.82626	0.0146289	0.466651
cyp-13A3	5.55087	-2.849	1.56267	-1.82316	0.0147979	0.466651
Y67A10A.9	23.6224	-2.58113	1.41194	-1.82807	0.0145315	0.466651
H35N09.2	35.8185	-2.01508	1.09661	-1.83755	0.0140287	0.466651
Y41C4A.8	35.0771	-1.35744	0.742397	-1.82846	0.0145103	0.466651
wrt-5	62.3903	-1.1579	0.633579	-1.82755	0.0145592	0.466651
F26F4.9	97.3886	-1.04538	0.573137	-1.82395	0.0147544	0.466651
gcp-2.1	92.0241	-0.918542	0.503084	-1.82582	0.0146527	0.466651
acly-2	273.747	0.783111	0.42713	1.83342	0.0142456	0.466651
fbxb-66	1343.22	0.813934	0.446598	1.82252	0.0148329	0.466651
T25C12.3	15.4963	1.89125	1.03553	1.82637	0.0146233	0.466651
C56G2.9	7.24861	2.39368	1.30429	1.83524	0.0141497	0.466651
spe-46	10.1414	2.59126	1.41297	1.83391	0.0142201	0.466651
D2085.7	2.3324	3.88247	2.12047	1.83094	0.0143773	0.466651
ethe-1	151.105	0.639138	0.351486	1.81839	0.0150609	0.47258
Y116A8C.43	7.46112	2.77442	1.52637	1.81766	0.0151013	0.472608
ZK1193.2	7.03055	-3.19725	1.7597	-1.81693	0.0151421	0.472647
C23G10.5	14.7229	-2.96275	1.63567	-1.81133	0.0154576	0.476777
npr-34	5.78745	-2.82406	1.5598	-1.81052	0.0155036	0.476777
Y77E11A.7	4497.77	0.363051	0.200475	1.81096	0.0154789	0.476777
C29E4.15	75.779	0.970339	0.535598	1.81169	0.015437	0.476777
gadr-2	714.466	1.03389	0.571099	1.81035	0.0155137	0.476777
Y46H3C.5	166.929	3.58513	1.97862	1.81193	0.0154235	0.476777
cutl-27	3.20347	-3.02177	1.67004	-1.8094	0.0155679	0.477216
Y7A5A.10	2.83442	-3.97646	2.20743	-1.8014	0.0160316	0.485208
egrh-2	17.2121	-2.23351	1.23956	-1.80186	0.0160046	0.485208
fbxb-51	339.664	0.611119	0.338984	1.8028	0.0159495	0.485208
T04B2.5	41.7276	1.3754	0.763132	1.80231	0.0159782	0.485208
dur-1	3.00873	3.34739	1.85553	1.80401	0.0158791	0.485208
his-2	8554.04	-0.633841	0.352213	-1.7996	0.0161377	0.487186
rps-26	2480.51	-0.524951	0.291823	-1.79887	0.0161807	0.487255
F02E9.3	3.20502	-3.2955	1.83397	-1.79692	0.0162963	0.489503
vit-2	4.01388	-3.26425	1.81862	-1.7949	0.0164168	0.491887
Y71G12B.30	7.9056	-2.40202	1.33943	-1.79332	0.016512	0.492627
ncx-2	103.003	-2.33408	1.30168	-1.79312	0.0165239	0.492627
cbp-2	31.0542	-4.29173	2.40685	-1.78313	0.0171358	0.493634
unc-105	12.8808	-3.56283	1.99735	-1.78378	0.0170955	0.493634
mec-4	4.32404	-3.53068	1.97685	-1.78601	0.0169575	0.493634
F20B6.5	4.93137	-3.39882	1.90126	-1.78766	0.0168559	0.493634
B0280.17	28.1174	-2.69273	1.50747	-1.78626	0.0169424	0.493634
Y71F9AL.4	19.0001	-2.51866	1.41216	-1.78356	0.0171096	0.493634
C09D4.1	14.9073	-2.15188	1.20241	-1.78964	0.016735	0.493634
klp-20	624.477	-1.04456	0.584699	-1.78649	0.0169279	0.493634
C35E7.10	48.747	-0.913755	0.512441	-1.78314	0.0171352	0.493634
Y80D4G.1	79.9982	-0.912061	0.511013	-1.78481	0.0170318	0.493634
Y25C1A.13	1210.16	-0.633191	0.353727	-1.79006	0.0167096	0.493634
W10D9.3	78.9398	1.03362	0.577313	1.7904	0.0166889	0.493634
F56A11.4	7.67588	2.1036	1.17797	1.78578	0.016972	0.493634
hlh-34	5.95996	2.38	1.32977	1.78979	0.0167261	0.493634
gly-12	50.4078	1.62722	0.913185	1.78191	0.017212	0.494637
bro-1	69.6586	-1.01236	0.568812	-1.77979	0.0173453	0.4949
W05H9.3	165.936	3.16003	1.77512	1.78018	0.0173206	0.4949
ver-2	4.04938	3.34886	1.88109	1.78028	0.0173145	0.4949
M151.2	2.4775	-3.99435	2.25253	-1.77327	0.0177595	0.496094
pfk-1.2	1.67764	-3.90467	2.19804	-1.77644	0.0175572	0.496094
ser-5	13.5207	-2.85579	1.60897	-1.77492	0.0176538	0.496094
acy-1	38.7302	-1.78294	1.0027	-1.77814	0.0174488	0.496094
F44G3.2	23.7969	-1.6847	0.949601	-1.77411	0.0177055	0.496094
W09B6.4	277.385	0.486569	0.273849	1.77678	0.0175354	0.496094
ztf-20	56.1637	1.1587	0.652769	1.77505	0.0176456	0.496094
Y62F5A.9	55.3009	1.27867	0.720752	1.77408	0.0177078	0.496094
gnrr-1	3.26282	3.60539	2.0336	1.77291	0.0177826	0.496094
fbxa-203	2.70733	3.63617	2.05131	1.77261	0.0178021	0.496094
F28C6.10	7.61607	1.97156	1.11357	1.77049	0.0179387	0.498738
C23H3.9	33.6475	-1.47389	0.832845	-1.7697	0.0179898	0.498999
fbxa-94	3.71615	-3.64117	2.0602	-1.76738	0.0181412	0.500748
T25B2.2	2.8864	-3.21297	1.81851	-1.76681	0.0181786	0.500748
tyr-1	142.821	-3.08084	1.74361	-1.76693	0.0181706	0.500748
T13G4.4	164.08	0.601849	0.341135	1.76426	0.0183467	0.504218
Y4C6B.3	2.84401	-4.48051	2.5505	-1.75672	0.0188508	0.504883
best-10	5.10986	-3.996	2.26906	-1.76108	0.0185578	0.504883
cbs-2	10.722	-2.14837	1.22322	-1.75632	0.0188777	0.504883
C39F7.5	362.501	-2.07295	1.17974	-1.75713	0.0188232	0.504883
T20F10.2	221.415	-0.907235	0.51539	-1.76029	0.0186106	0.504883
ddp-1	512.31	-0.592208	0.336078	-1.76211	0.0184889	0.504883
ipgm-1	181.688	0.657864	0.373589	1.76093	0.0185677	0.504883
T05A7.11	133.85	0.772922	0.439813	1.75739	0.0188057	0.504883
fbxb-92	318.426	1.31187	0.744382	1.76236	0.0184722	0.504883
cex-1	16.9708	1.80052	1.02368	1.75888	0.0187051	0.504883
Y77E11A.8	11.8739	2.01633	1.14709	1.75777	0.01878	0.504883
cyp-31A3	36.5656	2.35845	1.34026	1.7597	0.01865	0.504883
F07C6.3	2.55517	-4.18157	2.38316	-1.75464	0.0189923	0.506814
C36C9.5	5.21341	-4.02591	2.30192	-1.74893	0.0193841	0.507889
Y43F8B.28	7.18191	-3.93949	2.25387	-1.74788	0.0194574	0.507889
F35C11.5	95.6879	-2.66483	1.52151	-1.75144	0.0192111	0.507889
nlg-1	48.4216	-1.52134	0.867742	-1.75322	0.0190891	0.507889
dpy-31	56.9292	-0.985427	0.563593	-1.74847	0.0194162	0.507889
K07F5.16	122.771	-0.746589	0.426275	-1.75143	0.0192118	0.507889
W04A8.1	773.72	0.503414	0.287998	1.74798	0.0194506	0.507889
fbxa-135	45.7309	1.10949	0.633484	1.75141	0.0192131	0.507889
D1054.5	14.1907	1.56586	0.895635	1.74832	0.0194264	0.507889
mks-2	3.39357	3.31134	1.89203	1.75015	0.0192998	0.507889
F49D11.6	6.36071	3.02672	1.73251	1.74701	0.0195179	0.50836
Y39A3CL.4	148.34	0.570215	0.326617	1.74582	0.019601	0.509413
F55A12.6	3.53879	-4.30948	2.47096	-1.74405	0.0197255	0.510074
F21H7.5	2.70697	-3.63011	2.08192	-1.74364	0.0197544	0.510074
pgl-3	103.079	1.58729	0.910112	1.74406	0.0197244	0.510074
nekl-2	26.5107	1.15208	0.661214	1.74238	0.0198434	0.510431
C37E2.2	17.2237	1.48031	0.84966	1.74223	0.0198537	0.510431
F41G4.8	5.09427	-3.49975	2.01746	-1.73473	0.0203911	0.511159
C05C9.1	3.92816	-3.42261	1.97325	-1.73451	0.0204074	0.511159
E02H4.2	4.35221	-3.3466	1.92922	-1.73469	0.0203939	0.511159
F35E12.2	7.04507	-2.95505	1.70491	-1.73326	0.0204978	0.511159
spe-41	5.5943	-2.80486	1.61301	-1.7389	0.0200912	0.511159
mgl-2	8.03804	-2.76043	1.59197	-1.73397	0.0204464	0.511159
acr-5	13.9833	-2.28216	1.31222	-1.73917	0.0200717	0.511159
C04F12.5	56.9683	-1.27067	0.731474	-1.73714	0.0202173	0.511159
sago-1	962.037	0.521275	0.299666	1.73952	0.0200464	0.511159
gadr-3	436.17	0.913613	0.526623	1.73485	0.0203822	0.511159
Y47H10A.2	89.0189	1.32241	0.759906	1.74023	0.0199956	0.511159
K02E10.6	19.5432	1.51959	0.875501	1.73568	0.0203225	0.511159
Y43F8B.1	14.4664	1.58127	0.911745	1.73433	0.02042	0.511159
Y54G11A.14	16.7837	1.68581	0.972667	1.73318	0.0205034	0.511159
C34F6.1	4.455	2.62219	1.51317	1.73291	0.0205233	0.511159
R05D11.9	2170.72	0.499211	0.288293	1.73161	0.0206184	0.511395
Y37D8A.19	14.5677	2.67287	1.54323	1.732	0.0205901	0.511395
ttr-7	3.69855	-3.43007	1.98961	-1.72399	0.0211824	0.516842
F13D12.10	8.5165	-2.67141	1.54613	-1.7278	0.0208985	0.516842
btb-19	43.5434	-2.15218	1.24777	-1.72481	0.021121	0.516842
Y32F6A.5	15.1212	-1.98107	1.14694	-1.72726	0.0209385	0.516842
C48B4.9	54.1847	-1.33121	0.772422	-1.72342	0.0212252	0.516842
spe-6	30.4354	-1.32178	0.766959	-1.7234	0.0212271	0.516842
F45H10.2	1310.87	-0.542799	0.314434	-1.72627	0.0210121	0.516842
F52C12.1	295.775	0.478354	0.277263	1.72527	0.0210866	0.516842
F26F4.8	226.347	0.877373	0.508612	1.72504	0.0211044	0.516842
gtl-2	3.48685	3.63757	2.11174	1.72255	0.0212908	0.51734
ugt-60	40.4663	1.42874	0.830053	1.72126	0.0213879	0.518647
slo-1	60.9848	1.48551	0.864174	1.71899	0.0215599	0.521758
Y105C5A.1268	34.972	-1.02288	0.596216	-1.71562	0.0218181	0.526939
F54H12.7	4.15375	2.83492	1.65422	1.71375	0.0219616	0.528271
F52C9.5	6.14442	3.08007	1.79722	1.71379	0.0219587	0.528271
hst-3.2	96.6245	-1.21752	0.711313	-1.71165	0.0221247	0.531127
perm-1	19.9269	2.03566	1.19058	1.70981	0.0222686	0.533509
F54B11.7	3.26737	-3.85661	2.25927	-1.70702	0.0224877	0.535072
F40F11.4	8.64217	-2.77717	1.62654	-1.70741	0.0224573	0.535072
erv-46	257.134	-0.768259	0.449852	-1.70781	0.0224258	0.535072
twk-32	15.7981	2.7933	1.63667	1.7067	0.0225129	0.535072
ZK596.3	5.40692	-3.09821	1.82036	-1.70197	0.022889	0.540819
M04F3.3	56.876	-1.07649	0.632374	-1.70229	0.0228633	0.540819
Y18H1A.9	19.9099	1.60303	0.941873	1.70196	0.0228904	0.540819
lat-2	8.06349	-2.6531	1.56105	-1.69956	0.0230829	0.544293
B0334.5	202.983	0.816766	0.48078	1.69883	0.023142	0.54461
fbxa-118	1.31043	-5.18003	3.05327	-1.69655	0.0233272	0.545329
grd-7	15.7251	-2.07804	1.22459	-1.69692	0.0232971	0.545329
spe-44	25.0589	-1.51938	0.896042	-1.69565	0.0234006	0.545329
plc-2	68.8151	-1.40959	0.831072	-1.69611	0.0233635	0.545329
fbxa-149	96.0622	-0.821368	0.48438	-1.69571	0.0233958	0.545329
Y53F4B.14	167.535	-0.565043	0.333534	-1.69411	0.0235271	0.546606
eftu-2	8937.87	0.360947	0.21309	1.69387	0.0235468	0.546606
nhr-241	35.5248	-4.24306	2.50704	-1.69246	0.0236626	0.548229
C40H1.3	2.19795	-3.7257	2.20377	-1.6906	0.0238166	0.548607
C14A11.6	2.87738	-3.16368	1.87035	-1.69149	0.0237425	0.548607
C27H5.2	47.5609	1.12783	0.666925	1.69108	0.0237766	0.548607
fbxa-43	1.99119	-4.02423	2.38211	-1.68935	0.0239203	0.549609
T15B7.15	17.8935	-1.90162	1.12608	-1.6887	0.0239743	0.549609
cmd-1	2521.67	-0.564115	0.334108	-1.68842	0.023998	0.549609
F32B4.8	9.68005	1.92348	1.14052	1.68649	0.0241594	0.552248
ZK180.6	9.53409	-3.68598	2.18899	-1.68387	0.0243801	0.552503
col-118	6.23072	-3.13599	1.86119	-1.68494	0.0242904	0.552503
sams-5	707.707	-0.747975	0.444266	-1.68362	0.0244016	0.552503
ZK1053.4	6371.04	0.37465	0.222444	1.68424	0.0243489	0.552503
R09A1.2	10.3534	1.92523	1.14351	1.68362	0.0244016	0.552503
Y113G7B.15	3.56158	-3.43708	2.04705	-1.67904	0.0247921	0.558438
K06G5.3	27.5099	-3.28644	1.95812	-1.67836	0.0248506	0.558438
his-5	7629.46	-0.541916	0.322871	-1.67843	0.024845	0.558438
C52A10.3	92.4873	0.852865	0.507697	1.67987	0.0247213	0.558438
C08F8.2	295.077	-0.656321	0.391644	-1.67581	0.025071	0.562334
F40F9.5	112.069	1.01987	0.608853	1.67506	0.025136	0.562735
ego-1	220.242	1.27702	0.762648	1.67445	0.0251891	0.56287
W09G3.1	241.067	0.621667	0.371411	1.6738	0.0252462	0.563093
kin-6	2.23841	-4.17243	2.49859	-1.66991	0.0255873	0.565507
nhr-108	12.4967	-1.92232	1.15066	-1.67063	0.025524	0.565507
Y38H6C.14	52.0084	-1.04898	0.62818	-1.66987	0.0255909	0.565507
B0546.4	168.979	-0.673597	0.40312	-1.67096	0.025495	0.565507
sel-11	289.751	0.703446	0.4208	1.67169	0.0254307	0.565507
ZK637.12	4.95198	-3.09045	1.85562	-1.66546	0.0259832	0.567877
F01D5.10	6.12785	-2.27791	1.36647	-1.667	0.0258456	0.567877
clec-264	21.371	-2.02063	1.21311	-1.66567	0.0259643	0.567877
rnh-1.2	121.267	-1.30304	0.781881	-1.66655	0.0258856	0.567877
stn-1	198.428	0.881125	0.528319	1.66779	0.0257751	0.567877
F37A4.3	15.0765	1.78394	1.0705	1.66645	0.0258947	0.567877
F38H4.3	22.9104	1.19647	0.718749	1.66465	0.0260553	0.568415
his-32	21876.5	-0.561508	0.337662	-1.66293	0.0262099	0.570747
F42H10.5	69.601	0.903818	0.54382	1.66198	0.0262957	0.571573
aagr-2	124.787	-0.982206	0.591354	-1.66094	0.0263895	0.572572
F31A3.3	1.94042	-3.5782	2.16201	-1.65503	0.0269301	0.574909
F40E10.5	5.5204	-3.46822	2.09313	-1.65696	0.0267532	0.574909
ugt-34	16.7206	-2.67136	1.61233	-1.65683	0.0267645	0.574909
puf-3	179.71	-1.42678	0.860951	-1.65721	0.02673	0.574909
dct-18	381.138	-0.861515	0.520449	-1.65533	0.0269027	0.574909
nprl-3	343.117	0.537778	0.324166	1.65896	0.0265703	0.574909
rcn-1	196.842	0.810104	0.48926	1.65577	0.0268618	0.574909
ZC84.1	17.1247	1.74239	1.05093	1.65795	0.0266618	0.574909
F49E10.4	6.24288	2.43226	1.46895	1.65578	0.0268612	0.574909
T28F3.8	4.4327	-3.88942	2.3513	-1.65415	0.0270114	0.574967
F15A4.2	456.53	0.591611	0.357805	1.65344	0.0270771	0.574967
Y38F1A.8	10.9986	1.77198	1.07152	1.65371	0.0270525	0.574967
W05H9.1	412.037	-0.800744	0.484934	-1.65124	0.0272817	0.577262
C54C6.6	424.605	0.741577	0.449027	1.65152	0.027256	0.577262
ugt-37	23.774	-2.34731	1.42332	-1.64918	0.0274751	0.578532
C06G8.3	24.6401	-2.10492	1.2763	-1.64924	0.0274693	0.578532
mup-4	169.672	-1.03607	0.62828	-1.64905	0.0274869	0.578532
Y51F10.11	146.027	-1.10445	0.670185	-1.64798	0.027588	0.579639
nep-9	4.53302	-3.44198	2.0905	-1.64649	0.0277283	0.581113
fbxa-32	2.82444	-3.3868	2.05746	-1.6461	0.0277649	0.581113
R166.3	460.295	-0.471659	0.286602	-1.64569	0.027804	0.581113
jmjd-1.1	8.43163	-6.63357	4.03355	-1.6446	0.0279078	0.581724
sdz-15	349.647	0.678696	0.412742	1.64436	0.0279305	0.581724
Y22D7AR.2	2.56947	-4.51309	2.75158	-1.64018	0.0283307	0.582862
pgp-5	5.65812	-3.55308	2.16629	-1.64017	0.0283323	0.582862
F19H6.6	2.39754	-3.54796	2.16164	-1.64133	0.0282205	0.582862
M01G12.9	15.6674	-1.59702	0.973883	-1.63984	0.0283634	0.582862
npa-1	103.669	-1.21298	0.739746	-1.63972	0.0283752	0.582862
rpl-38	4578.54	-0.62705	0.38209	-1.6411	0.028242	0.582862
fbxb-43	545.154	0.698995	0.425453	1.64294	0.0280658	0.582862
ZK1290.14	22.6754	1.31971	0.803644	1.64216	0.0281403	0.582862
gpa-11	5.16243	-2.30158	1.40436	-1.63888	0.0284567	0.583532
H34I24.1	2.88063	-3.58814	2.19168	-1.63716	0.0286233	0.583988
lad-2	31.4699	-2.26106	1.38185	-1.63626	0.0287114	0.583988
rnh-1.3	51.2691	-1.06613	0.651617	-1.63614	0.0287231	0.583988
ncl-1	2280.11	0.423977	0.258856	1.63789	0.0285526	0.583988
nhr-131	70.6281	0.914812	0.5591	1.63622	0.0287146	0.583988
asp-13	2.81463	-2.95362	1.80644	-1.63505	0.0288291	0.584155
Y17D7B.4	12.8237	-2.30123	1.40702	-1.63553	0.0287819	0.584155
sra-23	1.35819	-4.3719	2.68361	-1.62911	0.0294153	0.589741
B0361.4	4.05668	-3.70718	2.27765	-1.62764	0.0295623	0.589741
slc-17.6	9.5215	-2.58757	1.58814	-1.62931	0.0293953	0.589741
C17H12.8	11.6133	-2.09488	1.28585	-1.62918	0.0294086	0.589741
glr-4	22.7192	-1.64136	1.00865	-1.62728	0.029598	0.589741
C38D9.8	284.899	0.563665	0.345623	1.63087	0.029241	0.589741
W10C8.4	27.9393	1.32749	0.815315	1.62819	0.0295068	0.589741
fbxc-43	10.0894	1.97257	1.2108	1.62915	0.0294117	0.589741
B0250.7	13.6608	2.28634	1.40472	1.6276	0.0295656	0.589741
chil-11	3.30134	2.94211	1.80697	1.6282	0.0295059	0.589741
ZK1240.9	5.42238	2.47217	1.52005	1.62637	0.0296892	0.590573
Y39A1A.21	109.892	0.525813	0.3235	1.62539	0.0297878	0.59155
col-138	2.57371	-4.79173	2.95171	-1.62337	0.0299914	0.593622
R06B10.1	9.30789	2.00014	1.23187	1.62365	0.0299629	0.593622
pqn-25	2.97239	-4.22345	2.6038	-1.62204	0.030127	0.59392
cyp-37A1	22.319	-1.8493	1.14133	-1.62029	0.0303046	0.59392
rla-1	2831.78	-0.660694	0.407678	-1.62063	0.0302704	0.59392
Y54G2A.17	1008.56	0.376334	0.23226	1.62031	0.0303023	0.59392
C50D2.10	13.731	1.56211	0.963417	1.62143	0.030189	0.59392
ZK250.2	9.7204	1.8538	1.14377	1.62079	0.030254	0.59392
T27F6.1	4.78821	-2.91638	1.80263	-1.61784	0.0305557	0.59698
fbxb-65	185.08	0.635611	0.393123	1.61683	0.0306604	0.59698
Y17G9B.2	152.459	0.728719	0.45069	1.6169	0.0306529	0.59698
gcy-36	11.229	1.88919	1.16798	1.61748	0.0305928	0.59698
cpt-2	1720.08	-0.513681	0.317949	-1.61561	0.0307862	0.597179
rps-15	3569.08	-0.510144	0.31566	-1.61612	0.0307332	0.597179
F26A3.4	10.9462	1.91049	1.18276	1.61528	0.0308205	0.597179
T08E11.1	2.05296	-4.0886	2.53861	-1.61057	0.0313119	0.598147
Y71H2AM.12	3.23723	-2.83424	1.76016	-1.61022	0.0313489	0.598147
C41D11.6	26.0462	-1.83367	1.13888	-1.61006	0.0313653	0.598147
cri-2	33.0618	-1.05857	0.657496	-1.61001	0.0313708	0.598147
Y18H1A.4	421.431	-0.433964	0.268851	-1.61414	0.0309383	0.598147
emb-27	2682.79	0.447642	0.277442	1.61346	0.0310096	0.598147
C06E1.9	401.961	0.535686	0.332398	1.61158	0.0312058	0.598147
K07A1.17	101.131	0.941654	0.584045	1.6123	0.0311307	0.598147
T08D2.1	14.6457	1.81369	1.12423	1.61327	0.0310291	0.598147
gem-1	9.96852	1.94266	1.20449	1.61285	0.0310733	0.598147
eat-5	5.91215	-2.71726	1.68967	-1.60816	0.0315658	0.599039
Y47G6A.3	10.2813	-2.29875	1.42956	-1.60802	0.031581	0.599039
madd-4	15.5447	-1.74432	1.0856	-1.60677	0.0317131	0.599039
F09E10.6	45.2025	-1.08438	0.674816	-1.60693	0.0316962	0.599039
sgk-1	192.714	0.487569	0.303492	1.60653	0.0317385	0.599039
fbxc-31	175.169	0.704641	0.438687	1.60625	0.0317683	0.599039
fbxb-118	124.527	0.755113	0.470008	1.6066	0.0317316	0.599039
Y40B1A.3	1054.16	0.514815	0.320604	1.60576	0.03182	0.599067
tsp-7	11.111	1.84293	1.14912	1.60377	0.0320329	0.602128
fbxc-19	191.863	0.608408	0.379855	1.60169	0.0322568	0.605385
C14C6.5	3.12269	-3.9101	2.44302	-1.60052	0.0323826	0.606792
B0034.7	8.33528	1.9769	1.23616	1.59922	0.0325233	0.608477
acr-24	6.15875	-4.38004	2.74368	-1.59641	0.0328298	0.608697
D2045.5	3.53768	-3.2297	2.02617	-1.59399	0.0330952	0.608697
nlp-14	4.16323	-3.10811	1.94935	-1.59444	0.033046	0.608697
C30F8.3	3.43456	-2.83794	1.77957	-1.59473	0.033014	0.608697
C41A3.2	4.58573	-2.80422	1.75919	-1.59404	0.0330903	0.608697
Y51A2A.16	35.1518	-1.80228	1.13062	-1.59406	0.0330874	0.608697
scd-1	2578.11	0.496223	0.311259	1.59424	0.0330674	0.608697
mdt-22	605.372	0.551917	0.345614	1.59692	0.0327742	0.608697
klf-3	43.825	0.964099	0.604201	1.59566	0.0329119	0.608697
C30G4.4	14.3229	1.39738	0.874492	1.59793	0.0326635	0.608697
Y15E3A.3	7.69599	2.50672	1.57179	1.59481	0.033005	0.608697
arrd-15	20.8146	1.66333	1.04387	1.59342	0.0331582	0.608919
Y54G2A.52	12.2319	1.65955	1.04208	1.59253	0.0332561	0.60978
C13A10.2	3.57838	-2.83404	1.78063	-1.59159	0.0333607	0.609827
rad-54	104.58	-0.97717	0.613863	-1.59184	0.0333333	0.609827
egas-4	4.67633	-3.7538	2.36399	-1.5879	0.0337716	0.609979
W02F12.8	5.52587	-3.38873	2.13422	-1.58781	0.0337824	0.609979
ZK858.8	1.51967	-3.34064	2.10468	-1.58725	0.0338452	0.609979
F42G4.2	10.8742	-2.08053	1.30957	-1.58871	0.0336809	0.609979
trp-4	13.5515	-1.81981	1.14527	-1.58898	0.0336513	0.609979
col-111	45.8968	-1.51697	0.956622	-1.58576	0.0340131	0.609979
lron-7	161.425	-0.664635	0.41876	-1.58715	0.033856	0.609979
F47A4.5	263.851	0.619627	0.390554	1.58653	0.0339257	0.609979
B0507.3	140.661	0.788458	0.497266	1.58559	0.0340323	0.609979
T16G1.2	9.88878	1.56834	0.988413	1.58672	0.0339045	0.609979
pud-4	8.64585	1.74478	1.09994	1.58625	0.0339576	0.609979
F32B4.5	10.7549	2.38618	1.50287	1.58775	0.0337891	0.609979
R10E11.5	3.84168	3.33646	2.10311	1.58644	0.0339362	0.609979
nhr-124	2.34644	-2.96221	1.87022	-1.58388	0.0342249	0.610298
H06I04.3	2156.5	-0.623379	0.393731	-1.58326	0.0342953	0.610298
ran-2	2226.18	0.48386	0.305627	1.58317	0.0343053	0.610298
C35D10.5	216.074	0.764021	0.482504	1.58345	0.0342742	0.610298
F31F6.3	9.51395	1.97098	1.24478	1.5834	0.0342798	0.610298
C17E4.1	33.2846	1.96959	1.24448	1.58266	0.0343635	0.610424
fzr-1	3569.04	0.373574	0.236276	1.58109	0.0345423	0.611782
ced-6	463.504	0.386347	0.244339	1.58119	0.0345315	0.611782
H06I04.6	43.7706	1.31941	0.835188	1.57977	0.0346937	0.613555
chs-1	60.3852	-2.4529	1.55457	-1.57787	0.0349129	0.613653
F49F1.8	21.7488	-1.95828	1.24278	-1.57572	0.0351612	0.613653
Y75B8A.28	11.2119	-1.69821	1.07756	-1.57598	0.0351309	0.613653
D1054.3	1897.54	-0.520422	0.330272	-1.57574	0.0351586	0.613653
C01F1.6	444.021	0.495094	0.314001	1.57673	0.0350439	0.613653
nhx-8	45.0612	1.09764	0.696156	1.57672	0.0350455	0.613653
dao-4	3.96621	2.59036	1.64071	1.5788	0.034805	0.613653
F53B3.6	3.71243	2.65716	1.68448	1.57744	0.0349624	0.613653
gpa-10	2.1609	4.4198	2.80223	1.57724	0.0349846	0.613653
oac-23	2.92061	-3.49665	2.22055	-1.57468	0.0352822	0.613973
axl-1	32.6048	-1.0979	0.697057	-1.57506	0.0352378	0.613973
Y23H5B.3	1.80309	-4.04412	2.56915	-1.57411	0.0353483	0.614228
clec-75	5.76655	-3.2837	2.08989	-1.57123	0.0356846	0.616488
fipr-22	3.20164	-2.93565	1.86833	-1.57126	0.0356813	0.616488
Y57G7A.11	5.73873	-2.78229	1.76935	-1.5725	0.0355365	0.616488
ZK616.5	79.6382	-1.18879	0.756392	-1.57166	0.0356341	0.616488
gly-8	77.0177	-0.820758	0.522583	-1.57058	0.0357618	0.616929
T01G9.2	2346.7	0.43035	0.274235	1.56927	0.0359155	0.618689
ttr-1	2.07832	-3.77902	2.4137	-1.56566	0.0363451	0.62429
W03F9.2	263.643	-0.74914	0.478392	-1.56596	0.0363094	0.62429
ncbp-1	3708.53	0.507426	0.324277	1.56479	0.0364485	0.625167
T12B3.2	4.60444	-2.9755	1.90537	-1.56164	0.036827	0.630123
R09F10.3	875.856	0.381246	0.244152	1.56151	0.0368428	0.630123
T10G3.8	6.08195	-2.97278	1.9058	-1.55986	0.0370423	0.630542
C27D6.12	3.21602	-2.77533	1.78842	-1.55183	0.0380269	0.630542
F25D1.3	4.56138	-2.5848	1.66464	-1.55277	0.0379107	0.630542
Y105E8A.1	5.7145	-2.12814	1.37278	-1.55024	0.0382246	0.630542
F09E5.16	14.7838	-1.95286	1.25678	-1.55386	0.0377757	0.630542
F13D2.1	39.4649	-1.68792	1.08967	-1.54901	0.0383777	0.630542
R07D5.2	62.6436	-1.60475	1.0339	-1.55214	0.0379887	0.630542
shw-1	77.6123	-1.31882	0.847099	-1.55687	0.0374065	0.630542
bath-34	22.2282	-1.29825	0.837608	-1.54994	0.0382615	0.630542
K11D12.12	90.4325	-1.03677	0.669886	-1.54768	0.0385441	0.630542
eat-20	148.111	-0.969089	0.623394	-1.55454	0.0376926	0.630542
unc-22	219.354	-0.914729	0.587635	-1.55663	0.0374362	0.630542
F43H9.3	79.1692	-0.738537	0.473321	-1.56033	0.0369852	0.630542
rpl-32	3341.43	-0.577044	0.371854	-1.5518	0.0380308	0.630542
Y39A3CL.3	464.576	-0.393696	0.254381	-1.54766	0.0385467	0.630542
rpl-15	3682.17	-0.360834	0.232695	-1.55067	0.038171	0.630542
alx-1	2802.51	0.389421	0.251191	1.5503	0.0382172	0.630542
vps-18	910.409	0.424012	0.273091	1.55264	0.0379265	0.630542
F56G4.6	395.445	0.495688	0.318796	1.55488	0.037651	0.630542
BE10.3	738.725	0.521936	0.33542	1.55607	0.0375047	0.630542
fbxb-108	436.926	0.536074	0.34387	1.55894	0.0371537	0.630542
F53C3.11	249.375	0.55835	0.360762	1.54769	0.038543	0.630542
fbxb-60	165.663	0.657238	0.424334	1.54887	0.0383957	0.630542
F21D9.1	94.4929	0.735176	0.474694	1.54874	0.0384123	0.630542
T13C2.3	68.0125	1.04142	0.669108	1.55642	0.0374611	0.630542
R01B10.4	53.8813	1.05771	0.678728	1.55837	0.0372234	0.630542
T02G5.14	318.128	1.23434	0.791197	1.56009	0.0370143	0.630542
arrd-7	19.5204	1.2602	0.809612	1.55655	0.0374454	0.630542
D1014.2	10.2677	1.48143	0.955773	1.54998	0.0382566	0.630542
fig-1	11.0994	1.56332	1.00364	1.55765	0.0373113	0.630542
Y51A2D.18	6.97848	1.93854	1.25261	1.5476	0.0385551	0.630542
T21D12.12	2.01843	3.42033	2.2037	1.55208	0.037996	0.630542
C18H2.1	35.3358	-2.83566	1.83359	-1.54651	0.0386919	0.631054
F48E8.4	502.791	-0.904343	0.584688	-1.54671	0.0386667	0.631054
F35B3.4	3.40118	-2.95358	1.91168	-1.54502	0.0388795	0.631684
irk-2	3.93413	-2.70497	1.75086	-1.54494	0.0388891	0.631684
trt-1	306.862	0.759315	0.491455	1.54503	0.0388779	0.631684
F40H6.2	1.99096	-3.44957	2.23441	-1.54384	0.0390295	0.632862
F38B6.6	57.1609	-1.29205	0.8373	-1.54312	0.0391205	0.632862
F41C3.11	22.382	1.85057	1.19903	1.54339	0.0390861	0.632862
F15G9.5	5.48853	-2.98649	1.93846	-1.54065	0.0394351	0.633329
CD4.19	8.16793	-2.74384	1.77916	-1.54222	0.0392354	0.633329
ugt-9	17.5245	-1.77259	1.15081	-1.5403	0.0394801	0.633329
C33B4.4	29.9609	-1.18499	0.769679	-1.53959	0.039571	0.633329
F37D6.3	41.6607	-0.962962	0.624525	-1.54191	0.0392743	0.633329
Y51H1A.3	1515.43	-0.39317	0.255125	-1.54109	0.039379	0.633329
rnf-121	245.766	0.830379	0.539357	1.53957	0.0395731	0.633329
ZC13.2	7.92696	1.74938	1.13476	1.54163	0.0393096	0.633329
Y9C9A.13	170.436	0.797011	0.518863	1.53607	0.0400245	0.639218
T28D6.7	14.6825	1.87702	1.22211	1.53589	0.0400481	0.639218
sqv-2	59.3852	-0.987505	0.643413	-1.53479	0.0401906	0.640242
cyp-13A2	7.03743	2.08737	1.36023	1.53457	0.0402193	0.640242
H42K12.3	156.723	-0.664802	0.433477	-1.53365	0.0403391	0.641295
K01C8.2	10.348	-2.15078	1.40347	-1.53247	0.0404933	0.642054
C35D6.3	19.7399	-2.09381	1.36631	-1.53246	0.0404943	0.642054
nhr-90	23.3607	1.18754	0.775134	1.53204	0.0405496	0.64208
F02D8.5	4.22271	-3.61848	2.36796	-1.5281	0.0410684	0.64463
R09H10.2	4.39516	-3.48944	2.28463	-1.52736	0.041167	0.64463
W08E12.8	4.71796	-2.47165	1.6171	-1.52845	0.0410226	0.64463
W08A12.2	4.87066	-2.46316	1.61291	-1.52715	0.0411939	0.64463
clec-140	12.642	-2.38506	1.56091	-1.52799	0.0410827	0.64463
cyn-17	16.1108	-2.18716	1.4322	-1.52714	0.0411959	0.64463
Y46G5A.8	385.516	0.55294	0.362055	1.52723	0.0411841	0.64463
B0238.1	44.2983	0.776064	0.507563	1.529	0.0409491	0.64463
F35C11.4	7.35649	2.31023	1.51224	1.52769	0.0411222	0.64463
M162.5	4.78761	-2.84103	1.86137	-1.52631	0.0413059	0.645016
F53B6.4	7.00429	-2.53608	1.66176	-1.52614	0.0413285	0.645016
B0554.4	2.03393	-4.98583	3.26898	-1.5252	0.0414542	0.645293
sdz-33	748.258	0.707704	0.463964	1.52534	0.0414349	0.645293
Y75B8A.16	87.5827	-1.38578	0.909339	-1.52394	0.0416224	0.647069
Y102A11A.3	6.86549	-2.94726	1.93499	-1.52314	0.0417293	0.647887
F38B2.2	2.2593	-4.64048	3.04842	-1.52225	0.0418484	0.648895
C46H11.3	1.64618	-4.52651	2.98674	-1.51554	0.0427603	0.64971
srb-18	2.64517	-4.33227	2.86226	-1.51359	0.0430282	0.64971
col-20	4.38295	-3.73753	2.45958	-1.51958	0.0422094	0.64971
Y43F8B.14	2.05912	-3.7275	2.46127	-1.51446	0.0429076	0.64971
F35D2.6	2.16142	-3.45672	2.28294	-1.51416	0.0429497	0.64971
H01G02.1	43.862	-3.29297	2.18323	-1.5083	0.0437612	0.64971
T24D1.3	33.7643	-3.29044	2.18514	-1.50583	0.0441082	0.64971
col-143	2.59074	-3.12301	2.06537	-1.51208	0.0432363	0.64971
tyr-2	6.61034	-2.79395	1.84332	-1.51572	0.0427357	0.64971
F13G3.12	15.397	-2.79222	1.84622	-1.5124	0.0431919	0.64971
C29G2.1	6.71163	-2.6377	1.73443	-1.52079	0.0420461	0.64971
cpg-2	436.396	-2.30015	1.52399	-1.5093	0.0436219	0.64971
W08F4.11	11.9894	-2.26465	1.50268	-1.50708	0.0439326	0.64971
nhr-178	5.55509	-2.16567	1.43102	-1.51338	0.0430568	0.64971
K05C4.8	9.24006	-1.85154	1.22037	-1.5172	0.0425335	0.64971
Y45F10C.6	14.4454	-1.56884	1.03284	-1.51896	0.0422938	0.64971
F40H3.1	37.6092	-1.08537	0.720997	-1.50537	0.0441719	0.64971
C53B4.4	259.598	-1.0684	0.709845	-1.50511	0.0442084	0.64971
Y65B4BL.3	44.026	-1.01991	0.677662	-1.50505	0.044218	0.64971
tmc-2	64.9655	-0.954174	0.632302	-1.50905	0.0436569	0.64971
lam-3	1779	-0.940095	0.620058	-1.51614	0.0426779	0.64971
nhr-55	41.4753	-0.914886	0.60588	-1.51001	0.0435227	0.64971
unc-64	338.997	-0.744948	0.494541	-1.50634	0.0440355	0.64971
T06D8.9	450.285	-0.728218	0.481242	-1.51321	0.0430805	0.64971
rps-23	4982.43	-0.551954	0.366624	-1.50551	0.0441531	0.64971
T27A3.7	291.368	-0.498962	0.33045	-1.50995	0.0435315	0.64971
F57C9.1	284.786	-0.461283	0.306181	-1.50657	0.0440038	0.64971
rpl-23	5163.33	-0.459644	0.30443	-1.50985	0.0435451	0.64971
vhl-1	187.142	-0.423067	0.28092	-1.50601	0.0440829	0.64971
Y94H6A.8	833.399	-0.385679	0.255659	-1.50857	0.0437241	0.64971
F56B3.4	1040.17	0.36393	0.241506	1.50692	0.0439547	0.64971
wee-1.3	1353.69	0.377669	0.248697	1.51859	0.042344	0.64971
csn-1	3688.13	0.392405	0.259541	1.51192	0.0432586	0.64971
ric-7	163.543	0.81724	0.537775	1.51967	0.0421974	0.64971
pmr-1	353.607	0.885354	0.586688	1.50907	0.0436535	0.64971
Y57G11C.1144	29.1971	1.30516	0.866188	1.50678	0.0439737	0.64971
Y47G6A.32	11.6762	1.35337	0.890255	1.52021	0.0421243	0.64971
K02D10.8	7.15674	1.73096	1.14511	1.51161	0.0433013	0.64971
col-176	5.63113	2.14678	1.42297	1.50866	0.0437114	0.64971
C12D12.1	4.20724	2.18987	1.44315	1.51742	0.0425029	0.64971
T16H12.9	5.10894	2.38964	1.58607	1.50664	0.0439938	0.64971
R160.3	4.82648	2.41527	1.59001	1.51902	0.0422848	0.64971
mgl-3	3.76409	2.7246	1.81048	1.5049	0.0442379	0.64971
sprr-3	2.33304	-4.12862	2.75482	-1.49869	0.0451215	0.650422
scrm-5	32.9006	-3.26811	2.17558	-1.50218	0.0446237	0.650422
sup-18	4.09777	-2.97218	1.98502	-1.49731	0.0453201	0.650422
T19C3.2	5.01505	-2.22341	1.47986	-1.50244	0.0445858	0.650422
T19D12.1	7.60536	-2.19959	1.46866	-1.49768	0.0452665	0.650422
fbxa-184	8.5146	-2.12626	1.41528	-1.50236	0.044598	0.650422
F40H3.3	10.6044	-1.6246	1.08405	-1.49864	0.0451286	0.650422
C14A4.7	15.5514	-1.51686	1.01171	-1.4993	0.045034	0.650422
CD4.18	141.582	-1.35839	0.906495	-1.4985	0.0451478	0.650422
Y52B11A.8	589.184	-0.792159	0.52869	-1.49834	0.0451712	0.650422
ZK742.2	243.94	-0.764098	0.509844	-1.49869	0.0451211	0.650422
Y48C3A.18	106.008	-0.677326	0.450521	-1.50343	0.0444464	0.650422
his-17	1533.68	-0.631833	0.421214	-1.50003	0.0449298	0.650422
rps-21	1751.61	-0.627453	0.418293	-1.50003	0.0449289	0.650422
C04G6.4	333.118	0.434983	0.29013	1.49927	0.0450383	0.650422
Y52B11A.12	87.81	0.624271	0.416127	1.50019	0.0449062	0.650422
T02H6.5	85.5031	0.864941	0.576006	1.50162	0.0447032	0.650422
C42D8.1	28.6249	0.989812	0.660871	1.49774	0.0452578	0.650422
cpg-9	5.43872	1.99565	1.33228	1.49792	0.0452315	0.650422
Y94H6A.12	117.145	0.720627	0.481407	1.49692	0.045376	0.650443
paf-2	154.587	0.603387	0.403381	1.49582	0.0455339	0.651925
npr-1	3.16113	-3.21437	2.15053	-1.49468	0.0456985	0.652136
odr-3	3.30568	-2.69752	1.80778	-1.49217	0.0460645	0.652136
Y69H2.17	4.67689	-2.41983	1.62191	-1.49196	0.0460941	0.652136
F08F1.3	14.0337	-1.41767	0.94929	-1.4934	0.0458853	0.652136
F56C9.3	237.445	-0.814104	0.545383	-1.49272	0.0459839	0.652136
rps-10	3159.64	-0.501733	0.335825	-1.49403	0.0457934	0.652136
fib-1	9733.84	-0.401863	0.269185	-1.49289	0.045959	0.652136
C48D1.1	722.851	0.741061	0.496625	1.4922	0.0460603	0.652136
tmem-135	57.8296	0.914159	0.611413	1.49516	0.0456299	0.652136
sptl-2	51.8111	0.915732	0.613458	1.49274	0.0459814	0.652136
Y11D7A.9	8.5465	1.94567	1.30453	1.49147	0.0461661	0.652383
set-9	995.152	0.81687	0.548147	1.49024	0.0463466	0.65416
R13G10.4	17.1848	-2.2443	1.50671	-1.48954	0.0464494	0.654838
ZK1321.1	2.00956	-3.92287	2.63789	-1.48712	0.0468055	0.656191
F01G10.6	2.47193	-3.25839	2.19284	-1.48592	0.0469829	0.656191
ace-2	37.8394	-1.98374	1.33491	-1.48605	0.0469634	0.656191
F35A5.1	17.0241	-1.71839	1.15663	-1.48569	0.0470177	0.656191
C46A5.6	94.0082	-1.3116	0.882909	-1.48554	0.0470394	0.656191
Y18H1A.2	322.845	-0.528948	0.355525	-1.48779	0.0467062	0.656191
K12H6.7	542.396	0.52895	0.355556	1.48767	0.0467243	0.656191
fbxb-72	197.318	0.657144	0.442161	1.48621	0.04694	0.656191
unc-103	23.7664	1.38391	0.93112	1.48628	0.0469294	0.656191
C29F7.1	15.4815	-2.22641	1.4998	-1.48448	0.047198	0.656747
aagr-1	7.21651	-2.0728	1.39667	-1.48411	0.0472528	0.656747
rrf-2	111.096	-1.23057	0.828785	-1.48479	0.0471507	0.656747
F59A2.6	682.939	-1.02078	0.688292	-1.48306	0.0474088	0.656747
glb-11	12.6566	1.39032	0.937308	1.48331	0.0473713	0.656747
gad-2	7.0648	1.78064	1.20033	1.48346	0.0473494	0.656747
fkb-5	641.625	-0.686134	0.462801	-1.48257	0.0474829	0.657012
aptf-1	12.3908	1.57546	1.06368	1.48114	0.0476973	0.65875
Y38F1A.1	3.35219	2.71547	1.83354	1.48099	0.0477187	0.65875
K10B4.1	3.93964	-2.60416	1.76093	-1.47886	0.0480406	0.659386
F13A7.11	35.8377	-2.553	1.72605	-1.47911	0.0480031	0.659386
Y87G2A.11	171.257	0.560573	0.378947	1.47929	0.0479752	0.659386
insc-1	85.0725	0.594107	0.401468	1.47984	0.0478929	0.659386
W03D8.2	16.6282	1.29652	0.876461	1.47927	0.0479788	0.659386
ZK1320.5	2.69247	-3.70219	2.50634	-1.47713	0.0483022	0.660526
tag-141	3.27643	-3.35228	2.27577	-1.47303	0.0489285	0.660526
F55G11.8	18.1541	-3.32028	2.25195	-1.4744	0.0487177	0.660526
T05A8.8	1.96386	-3.25402	2.20827	-1.47356	0.048847	0.660526
dpy-6	4.07351	-2.74362	1.8572	-1.47729	0.0482784	0.660526
col-14	3.13258	-2.66855	1.80892	-1.47521	0.0485942	0.660526
C07F11.2	5.92188	-2.65157	1.80189	-1.47154	0.0491563	0.660526
M88.3	8.75695	-2.34272	1.59291	-1.47072	0.0492839	0.660526
bre-2	10.0959	-2.26931	1.54365	-1.47009	0.0493803	0.660526
asp-2	8.85288	-2.18058	1.48458	-1.46881	0.0495789	0.660526
F25E5.5	30.2973	-1.25463	0.853447	-1.47007	0.0493836	0.660526
Y106G6H.1	27.1385	-1.24562	0.844161	-1.47557	0.0485389	0.660526
ptr-10	46.5944	-1.19128	0.807765	-1.47479	0.0486593	0.660526
Y69A2AR.31	19.4717	-1.19125	0.809212	-1.47211	0.0490693	0.660526
F53F10.8	35.5455	-0.992841	0.674572	-1.47181	0.0491157	0.660526
btbd-10	1194.16	-0.886987	0.601984	-1.47344	0.0488653	0.660526
C06B8.7	1776.85	-0.8245	0.557897	-1.47787	0.0481899	0.660526
Y57A10A.29	235.296	-0.548512	0.372268	-1.47343	0.0488663	0.660526
F02E9.10	1881.34	0.380812	0.25872	1.47191	0.0491007	0.660526
wve-1	1760.76	0.452562	0.308134	1.46872	0.0495934	0.660526
fbxb-106	289.234	0.465117	0.31532	1.47507	0.0486166	0.660526
pah-1	199.072	0.545907	0.371725	1.46858	0.0496154	0.660526
fbxb-81	373.331	0.696275	0.473433	1.47069	0.0492875	0.660526
T14B1.1	93.8084	0.720559	0.490298	1.46963	0.0494515	0.660526
gstk-2	24.7213	0.88751	0.601693	1.47502	0.0486233	0.660526
Y116A8C.3	25.5978	0.948001	0.645424	1.4688	0.0495803	0.660526
F53C3.3	16.5217	1.46743	0.997464	1.47116	0.0492151	0.660526
F15A8.6	15.6244	-1.20708	0.82256	-1.46747	0.0497874	0.660608
F44A6.3	36.9686	1.2414	0.845848	1.46764	0.0497615	0.660608
ZK154.1	27.2778	1.33653	0.910516	1.46788	0.049724	0.660608
F40D4.12	4.14481	-2.19031	1.49368	-1.46639	0.049956	0.662078
ncr-1	26.9724	-1.47241	1.00458	-1.4657	0.0500643	0.662078
Y116A8C.44	6.86531	2.06429	1.40816	1.46595	0.0500252	0.662078
K05F1.6	42.06	-1.10509	0.754236	-1.46518	0.0501447	0.662408
M153.2	90.2665	0.947243	0.646894	1.46429	0.050284	0.663484
C03A3.1	60.7411	1.01251	0.691627	1.46396	0.0503371	0.663484
sdz-5	722.185	0.710317	0.485439	1.46325	0.0504485	0.66422
R05D8.7	3.56531	2.82688	1.93434	1.46142	0.0507372	0.667286
C15C6.2	3.16068	-2.66119	1.82296	-1.45982	0.0509907	0.669829
Y71H2B.4	13.5947	-1.67331	1.14756	-1.45814	0.0512574	0.669829
F11E6.3	16.5494	-1.63458	1.12088	-1.4583	0.051233	0.669829
C34B2.11	14.2022	-1.55348	1.06552	-1.45796	0.051287	0.669829
nkb-1	472.064	-0.620676	0.425633	-1.45824	0.0512418	0.669829
ipla-1	521.601	0.587336	0.40291	1.45773	0.0513227	0.669829
F38E11.9	131.4	0.974527	0.668468	1.45785	0.0513043	0.669829
C34C6.9	2.67344	-3.60575	2.47531	-1.45668	0.0514907	0.671288
wrt-9	3.48287	-3.03059	2.08737	-1.45187	0.0522666	0.672305
srxa-6	6.58915	-2.89744	1.99274	-1.454	0.0519228	0.672305
C49H3.16	6.54257	-2.87357	1.97836	-1.4525	0.0521638	0.672305
T22F7.5	5.91272	-2.76003	1.90173	-1.45133	0.0523544	0.672305
D1054.9	8.87196	-2.23556	1.53753	-1.45399	0.0519241	0.672305
egg-5	60.3202	-2.21292	1.52549	-1.45063	0.0524685	0.672305
twk-45	12.1195	-2.01815	1.38981	-1.45211	0.052228	0.672305
LLC1.2	15.8372	-1.73027	1.19045	-1.45347	0.0520084	0.672305
hum-8	25.2287	-1.19431	0.821843	-1.45321	0.0520492	0.672305
rps-24	4110.27	-0.596562	0.411183	-1.45084	0.0524334	0.672305
K02B7.3	466.626	-0.59098	0.406581	-1.45353	0.0519974	0.672305
R01B10.6	137.347	0.589012	0.405036	1.45422	0.0518866	0.672305
F52E1.9	118.989	0.787974	0.541707	1.45461	0.0518232	0.672305
T28C6.8	63.5719	0.907327	0.624749	1.45231	0.0521959	0.672305
C18B10.6	20.9947	1.0147	0.699449	1.45072	0.0524538	0.672305
T05F1.5	2.56542	3.82199	2.62837	1.45413	0.0519014	0.672305
F20D12.12	28.59	-1.53834	1.06093	-1.45	0.0525713	0.672901
ZK1240.1	4.65532	-3.67363	2.54733	-1.44215	0.0538635	0.673393
F28F5.6	2.58702	-3.28622	2.28533	-1.43796	0.0545628	0.673393
C44H4.8	2.13702	-3.28437	2.28619	-1.43662	0.0547901	0.673393
F26G1.5	4.6015	-3.08191	2.1567	-1.42899	0.0560887	0.673393
fip-5	7.86727	-2.88719	1.99556	-1.44681	0.053093	0.673393
C09G12.17	3.27522	-2.88598	2.00103	-1.44225	0.0538464	0.673393
C50F2.7	4.76768	-2.77363	1.91781	-1.44625	0.0531854	0.673393
Y23H5A.8	2.63907	-2.69366	1.86488	-1.44442	0.0534868	0.673393
csp-1	4.72971	-2.44216	1.69748	-1.4387	0.0544395	0.673393
C25G6.3	3.66339	-2.44109	1.70215	-1.43412	0.0552121	0.673393
nhr-211	5.63612	-2.4114	1.67367	-1.44078	0.0540909	0.673393
T17H7.7	9.07454	-2.2489	1.57415	-1.42864	0.0561492	0.673393
F26A3.5	5.28115	-2.05186	1.41917	-1.44582	0.053256	0.673393
C05E7.1	9.02836	-2.00559	1.39115	-1.44168	0.0539404	0.673393
myo-5	16.6991	-1.99778	1.39397	-1.43316	0.0553751	0.673393
E04F6.6	8.1481	-1.99675	1.38813	-1.43844	0.0544825	0.673393
prg-2	34.3341	-1.9636	1.37366	-1.42947	0.0560066	0.673393
F10E9.2	6.30425	-1.94784	1.35817	-1.43416	0.055205	0.673393
C13F10.1	9.16009	-1.88285	1.31742	-1.42919	0.0560548	0.673393
sgca-1	18.0498	-1.87796	1.29802	-1.44679	0.0530958	0.673393
let-23	24.1091	-1.87503	1.31016	-1.43114	0.0557201	0.673393
Y55D5A.3	19.4659	-1.73114	1.21078	-1.42977	0.0559557	0.673393
rft-1	7.58708	-1.6947	1.17823	-1.43835	0.0544986	0.673393
C37C3.7	12.4598	-1.66291	1.15664	-1.43771	0.0546056	0.673393
cut-6	18.068	-1.44663	1.01264	-1.42857	0.0561617	0.673393
F19B2.6	14.8178	-1.41709	0.990474	-1.43072	0.0557919	0.673393
E_BE45912.2	19.0836	-1.2124	0.837136	-1.44828	0.0528522	0.673393
lact-2	24.2244	-1.16496	0.81131	-1.4359	0.0549105	0.673393
Y17G7B.8	30.994	-1.0321	0.715819	-1.44185	0.0539137	0.673393
Y73B6BL.23	116.768	-1.03098	0.716386	-1.43913	0.0543664	0.673393
F48E3.9	84.7199	-0.874517	0.607344	-1.4399	0.0542375	0.673393
nipi-3	1017.16	-0.872422	0.603418	-1.4458	0.0532586	0.673393
C15F1.5	47.9294	-0.823926	0.570964	-1.44304	0.0537149	0.673393
rsbp-1	80.053	-0.77069	0.534615	-1.44158	0.0539579	0.673393
lsl-1	170.726	-0.770578	0.539426	-1.42851	0.0561709	0.673393
nhr-114	151.158	-0.625846	0.43584	-1.43595	0.0549016	0.673393
C27F2.9	213.604	-0.602869	0.417496	-1.44401	0.0535543	0.673393
C01G10.10	235.761	-0.556549	0.384907	-1.44593	0.0532374	0.673393
tct-1	8636.83	-0.522351	0.363234	-1.43805	0.0545477	0.673393
rpl-10	4786.7	-0.436942	0.305306	-1.43116	0.0557164	0.673393
rps-1	3978.02	-0.395801	0.277121	-1.42826	0.0562147	0.673393
rpl-7	5424.32	-0.388989	0.268897	-1.44661	0.0531258	0.673393
pmk-1	1145.31	0.340045	0.237918	1.42925	0.0560435	0.673393
kars-1	2149.95	0.347291	0.240717	1.44274	0.0537654	0.673393
xpo-3	766.751	0.361295	0.250589	1.44179	0.0539237	0.673393
Y110A7A.9	1732.81	0.398294	0.275354	1.44648	0.0531466	0.673393
klf-2	70.9663	0.544945	0.377972	1.44176	0.053928	0.673393
htp-3	562.715	0.556411	0.387658	1.43531	0.05501	0.673393
frh-1	160.337	0.577597	0.402545	1.43486	0.0550862	0.673393
fbxb-50	285.049	0.63906	0.44442	1.43797	0.0545626	0.673393
fbxb-3	722.004	0.659589	0.460805	1.43138	0.0556783	0.673393
fbxb-90	498.006	0.805716	0.557156	1.44612	0.0532058	0.673393
fbxb-91	1017.28	0.817417	0.56482	1.44722	0.0530261	0.673393
C09E7.8	202.234	0.822109	0.572315	1.43646	0.0548156	0.673393
C31H5.5	37.0265	0.834627	0.582844	1.43199	0.055575	0.673393
F40G9.14	28.0021	1.21402	0.840677	1.4441	0.0535396	0.673393
H40L08.2	25.0513	1.3306	0.926121	1.43675	0.0547681	0.673393
mboa-1	14.1149	1.36523	0.950882	1.43575	0.0549364	0.673393
tag-83	13.37	1.42174	0.991724	1.43361	0.0552994	0.673393
C13C4.6	11.4884	1.53845	1.07296	1.43384	0.055259	0.673393
lin-18	22.591	1.67571	1.16956	1.43278	0.0554408	0.673393
F54E7.6	8.91304	1.89745	1.32762	1.42921	0.0560511	0.673393
cpx-1	4.89366	1.97418	1.37147	1.43946	0.0543111	0.673393
D2096.11	6.7897	2.3891	1.66433	1.43547	0.0549829	0.673393
taf-2	1027.54	0.4518	0.316525	1.42738	0.0563671	0.673868
Y65B4A.2	10.6998	1.42389	0.99739	1.42761	0.0563261	0.673868
nlp-47	4.11436	-2.46965	1.73226	-1.42568	0.0566613	0.675713
D1046.3	139.569	0.565005	0.396417	1.42528	0.0567307	0.675713
fbxb-24	647.023	0.7587	0.532138	1.42576	0.056647	0.675713
C07H4.1	4.23264	2.52362	1.77074	1.42518	0.0567475	0.675713
pqn-54	3.50917	-3.11329	2.18686	-1.42364	0.0570162	0.675889
aqp-9	6.00393	-2.61276	1.83568	-1.42332	0.0570708	0.675889
ZK337.2	14.6408	-1.47034	1.03291	-1.42349	0.0570415	0.675889
F18A12.7	16.7256	-1.28386	0.901779	-1.4237	0.0570051	0.675889
fbxb-88	605.033	0.632956	0.444829	1.42292	0.0571413	0.675889
T09A5.7	203.253	0.639909	0.449467	1.42371	0.0570039	0.675889
C28G1.6	5.87218	1.71762	1.20719	1.42282	0.057158	0.675889
his-38	7299.46	-0.446265	0.313857	-1.42187	0.0573245	0.675994
cec-5	14507.8	-0.399507	0.280951	-1.42198	0.0573053	0.675994
C25A1.16	767.241	0.60717	0.427042	1.4218	0.0573365	0.675994
col-69	6.22897	-2.77874	1.95651	-1.42025	0.0576092	0.677285
Y55B1AR.3	5.26036	-2.4584	1.73144	-1.41985	0.0576791	0.677285
fbxa-210	692.285	0.466554	0.328432	1.42055	0.0575564	0.677285
add-2	503.302	0.563829	0.397075	1.41996	0.057661	0.677285
dkf-2	118.164	0.893702	0.629559	1.41957	0.0577293	0.677285
tsp-17	53.7845	0.826152	0.582132	1.41918	0.0577972	0.677417
C43H6.3	239.046	-0.51166	0.36086	-1.41789	0.058025	0.679421
Y71A12B.10	14.7265	-1.79602	1.26817	-1.41622	0.0583211	0.681163
R11E3.2	33.9199	-1.78198	1.25838	-1.41609	0.0583447	0.681163
B0035.3	169.99	0.788127	0.556427	1.41641	0.0582888	0.681163
nhr-17	327.566	-0.389352	0.275063	-1.4155	0.0584494	0.68172
lab-1	148.069	-0.744298	0.526166	-1.41457	0.0586157	0.682878
rps-5	3909.35	-0.406433	0.287373	-1.4143	0.058663	0.682878
F37B12.1	3.72238	-2.98982	2.11529	-1.41343	0.0588186	0.682904
T12B3.3	21.6094	-2.21259	1.56495	-1.41384	0.0587466	0.682904
sfxn-1.5	231.589	-0.486042	0.343898	-1.41333	0.0588366	0.682904
fbxa-206	179.28	0.793097	0.561435	1.41262	0.0589637	0.683053
cutl-6	9.39376	1.62818	1.15239	1.41287	0.0589197	0.683053
snn-1	23.5891	-1.13634	0.804897	-1.41178	0.0591149	0.683591
oac-51	56.1141	-1.12914	0.800011	-1.41141	0.0591816	0.683591
T05H10.8	18.8856	1.19924	0.849535	1.41165	0.0591391	0.683591
K02A2.5	2.47833	-2.61483	1.85533	-1.40936	0.0595519	0.683903
B0207.5	9.26721	-2.12024	1.50391	-1.40982	0.0594679	0.683903
col-38	16.5463	-1.74338	1.23661	-1.40981	0.0594701	0.683903
rpl-9	2225.47	-0.396763	0.281498	-1.40947	0.0595313	0.683903
bath-15	206.983	0.656851	0.465813	1.41012	0.0594144	0.683903
F35E2.8	139.244	0.705412	0.500206	1.41024	0.059392	0.683903
lron-9	43.4667	-0.942898	0.669486	-1.40839	0.0597267	0.684084
ile-1	481.476	-0.628194	0.446059	-1.40832	0.0597393	0.684084
fbxb-52	197.07	0.466042	0.330803	1.40882	0.0596493	0.684084
trp-1	2.16513	-3.47286	2.46768	-1.40734	0.0599181	0.684329
T04B8.1	2.8625	-3.24464	2.30592	-1.40709	0.0599623	0.684329
trx-2	232.57	-0.571735	0.406367	-1.40694	0.0599897	0.684329
rpl-6	4384.22	-0.445335	0.316327	-1.40783	0.0598281	0.684329
drn-1	6.38815	-2.10804	1.49941	-1.40592	0.0601762	0.684498
cogc-3	759.46	0.599788	0.426535	1.40619	0.0601275	0.684498
fbxb-82	280.232	0.686683	0.488372	1.40607	0.0601493	0.684498
B0513.4	4.02925	-2.58022	1.83936	-1.40278	0.0607503	0.684584
sssh-1	5.3234	-2.31812	1.65373	-1.40176	0.0609389	0.684584
clec-123	6.69463	-2.31299	1.64743	-1.404	0.0605268	0.684584
R07E3.2	7.13439	-2.22097	1.58751	-1.39903	0.0614436	0.684584
slc-17.5	19.5862	-2.16975	1.54805	-1.4016	0.0609688	0.684584
Y108G3AL.10	10.377	-2.14421	1.52969	-1.40173	0.0609444	0.684584
trpa-2	7.89852	-2.08366	1.48863	-1.39971	0.0613166	0.684584
lips-12	14.0034	-1.69215	1.20502	-1.40425	0.0604809	0.684584
R06C1.6	100.809	-1.17701	0.83879	-1.40322	0.0606703	0.684584
tofu-3	32.4565	-1.07955	0.768674	-1.40443	0.0604473	0.684584
acp-6	60.7006	-0.928436	0.661282	-1.40399	0.0605279	0.684584
aars-1	33.8749	-0.924032	0.659723	-1.40064	0.0611461	0.684584
T19E7.6	54.0019	-0.883235	0.630352	-1.40118	0.0610461	0.684584
his-62	23085.2	-0.611041	0.436674	-1.39931	0.0613918	0.684584
ZK688.7	606.167	-0.583261	0.416727	-1.39962	0.0613332	0.684584
ppfr-2	2199.66	0.37112	0.264433	1.40345	0.0606269	0.684584
T14G8.2	103.291	0.553349	0.394957	1.40104	0.0610719	0.684584
rnf-1	200.297	0.589216	0.42095	1.39973	0.0613133	0.684584
nhr-246	90.2609	0.641157	0.456376	1.40489	0.0603644	0.684584
fbxb-83	360.181	0.837256	0.59648	1.40366	0.0605891	0.684584
C07B5.8	29.2344	0.89746	0.640866	1.40039	0.0611921	0.684584
oac-9	2.34565	3.50928	2.50513	1.40084	0.0611087	0.684584
col-116	2.31668	-3.55846	2.55146	-1.39468	0.0622549	0.685611
F23B12.1	1.90287	-3.40496	2.43823	-1.39649	0.0619165	0.685611
B0280.7	2.24028	-3.01357	2.15899	-1.39582	0.0620406	0.685611
fbxa-190	3.53648	-2.8817	2.07598	-1.38811	0.0634965	0.685611
ZK6.11	4.88387	-2.86783	2.06865	-1.38633	0.0638379	0.685611
sdf-9	2.64757	-2.80586	2.00713	-1.39794	0.0616456	0.685611
F26G1.10	2.01298	-2.7817	2.0046	-1.38766	0.0635829	0.685611
T16G1.5	9.33141	-2.47727	1.78683	-1.38641	0.0638224	0.685611
K11H3.4	8.45984	-2.46261	1.76501	-1.39524	0.0621507	0.685611
gst-32	3.73252	-2.44991	1.75581	-1.39531	0.0621359	0.685611
irg-3	4.68863	-2.27662	1.63711	-1.39063	0.0630181	0.685611
K02E2.11	16.7369	-2.22777	1.60646	-1.38676	0.0637548	0.685611
glt-4	5.69392	-2.20728	1.57953	-1.39743	0.0617412	0.685611
T08B1.1	7.65377	-2.18287	1.56245	-1.39708	0.0618068	0.685611
C34C6.3	8.53457	-2.09986	1.51114	-1.38958	0.0632167	0.685611
F45D11.5	81.7354	-2.0745	1.4847	-1.39725	0.0617734	0.685611
F07F6.7	12.137	-2.06207	1.48548	-1.38814	0.0634906	0.685611
npr-21	12.376	-2.0285	1.46388	-1.3857	0.0639581	0.685611
math-34	40.733	-2.00508	1.44569	-1.38693	0.0637223	0.685611
unc-122	12.0817	-1.95701	1.41033	-1.38763	0.0635892	0.685611
F43E2.6	20.1933	-1.83416	1.32166	-1.38777	0.0635623	0.685611
ugt-39	10.925	-1.80907	1.30118	-1.39033	0.0630743	0.685611
let-756	13.1548	-1.80483	1.29906	-1.38934	0.0632637	0.685611
F46H5.5	6.67146	-1.7809	1.27785	-1.39367	0.0624447	0.685611
F53C3.6	13.7803	-1.76848	1.27672	-1.38517	0.0640592	0.685611
F59G1.4	12.0297	-1.66612	1.20044	-1.38793	0.063532	0.685611
Y66D12A.21	201.244	-0.816051	0.58796	-1.38794	0.0635304	0.685611
his-40	3996.43	-0.446092	0.321771	-1.38637	0.0638305	0.685611
phf-5	934.84	-0.368776	0.265478	-1.3891	0.0633084	0.685611
F20D1.9	324.154	-0.349679	0.251356	-1.39117	0.0629159	0.685611
sdz-9	997.562	0.400637	0.288722	1.38762	0.06359	0.685611
nra-3	2664.23	0.415622	0.298042	1.39451	0.0622867	0.685611
B0035.6	1658.52	0.500638	0.361093	1.38645	0.0638144	0.685611
Y69A2AR.16	2313.11	0.501244	0.361276	1.38742	0.0636282	0.685611
Y51H1A.2	2254.58	0.533493	0.384055	1.3891	0.0633078	0.685611
fbxb-8	177.758	0.549331	0.394087	1.39394	0.0623947	0.685611
F39B2.5	247.658	0.585966	0.422711	1.38621	0.0638603	0.685611
fbxb-25	84.1583	0.651749	0.467946	1.39278	0.0626112	0.685611
arrd-13	71.1819	0.735195	0.52688	1.39537	0.0621248	0.685611
B0024.13	36.7404	1.05838	0.75825	1.39582	0.0620411	0.685611
nlp-11	18.8685	1.28035	0.924198	1.38536	0.0640225	0.685611
F46F3.3	16.823	1.37473	0.992458	1.38518	0.0640579	0.685611
nhr-117	8.41896	1.53814	1.10643	1.39018	0.0631043	0.685611
egl-21	5.32872	2.28977	1.65225	1.38585	0.0639298	0.685611
Y54E2A.8	35.617	-1.39406	1.00684	-1.38458	0.0641725	0.68621
H32C10.1	3.72499	-2.39728	1.73268	-1.38357	0.0643676	0.686611
ubc-8	41.9205	0.721784	0.521711	1.38349	0.0643823	0.686611
ptr-21	130.331	0.883231	0.638364	1.38358	0.0643649	0.686611
W10C6.2	2.18007	-3.00312	2.1724	-1.3824	0.0645936	0.686772
cutl-26	16.9918	-1.93349	1.40124	-1.37984	0.0650897	0.686772
hlh-13	10.4074	-1.30194	0.943043	-1.38058	0.0649471	0.686772
ttr-41	28.9063	-1.24384	0.901995	-1.37899	0.0652566	0.686772
brp-1	28.9738	-1.23341	0.893625	-1.38023	0.0650139	0.686772
arl-13	22.0593	-1.21878	0.882288	-1.38138	0.0647908	0.686772
rsp-3	20343.5	-0.356245	0.257986	-1.38087	0.0648909	0.686772
spr-5	1879.23	0.341071	0.247337	1.37897	0.0652591	0.686772
F09G2.2	928.904	0.402997	0.291967	1.38028	0.0650046	0.686772
fbxb-38	282.93	0.612005	0.443734	1.37922	0.0652118	0.686772
fbxb-5	96.8337	0.719887	0.521387	1.38071	0.0649204	0.686772
cec-9	91.7983	0.769209	0.556276	1.38278	0.0645197	0.686772
C33H5.13	14.6357	1.32356	0.959337	1.37966	0.0651254	0.686772
F39B2.9	10.4487	1.77166	1.28235	1.38157	0.0647534	0.686772
mec-2	4.10146	2.2502	1.62769	1.38245	0.0645846	0.686772
F54D10.9	4.41436	-2.82992	2.05363	-1.37801	0.0654474	0.687295
F20C5.4	4.32783	-2.38739	1.73233	-1.37814	0.0654215	0.687295
F22E5.17	127.782	-1.08945	0.790973	-1.37736	0.0655747	0.687295
fbxb-111	205.574	0.543535	0.394653	1.37725	0.0655963	0.687295
poml-2	17.0831	1.28656	0.933789	1.37778	0.0654916	0.687295
Y37F4.8	1.76875	-3.07853	2.23716	-1.37609	0.0658236	0.687524
F09B9.4	4.48672	-2.31366	1.68139	-1.37604	0.065833	0.687524
Y116F11A.1	141.346	-1.08948	0.791806	-1.37595	0.0658516	0.687524
rps-20	2720.92	-0.520091	0.378025	-1.37581	0.0658781	0.687524
F41E7.7	1.51313	3.79067	2.75551	1.37567	0.0659057	0.687524
R12B2.8	2.42618	-2.69748	1.96129	-1.37536	0.065966	0.687553
F20D6.10	27.6659	-0.965661	0.702288	-1.37502	0.0660336	0.687658
H05L14.2	73.9209	0.99372	0.72303	1.37438	0.0661595	0.68837
chs-2	33.3378	-1.46547	1.06709	-1.37334	0.0663649	0.689906
F55C9.14	111.353	0.633282	0.461428	1.37244	0.0665439	0.690566
gst-14	4.33654	2.82989	2.06158	1.37268	0.0664961	0.690566
fut-1	5.38295	-2.20074	1.60482	-1.37133	0.0667636	0.690779
T18D3.7	30.7805	-1.03225	0.752531	-1.37171	0.0666883	0.690779
K07C5.13	14.4543	1.17963	0.860312	1.37117	0.0667955	0.690779
F14F9.4	45.7598	1.99314	1.45304	1.37171	0.0666884	0.690779
nhr-83	3.78783	-2.88495	2.10608	-1.36982	0.0670639	0.692058
mtx-2	644.908	-0.437869	0.319754	-1.36939	0.0671493	0.692058
B0454.5	2.92247	2.57686	1.88074	1.37013	0.0670028	0.692058
F38B7.2	3.60859	2.78228	2.03177	1.36939	0.0671507	0.692058
srx-78	1.91776	-3.64803	2.67209	-1.36523	0.0679842	0.69424
Y57G11C.42	2.62772	-3.01269	2.20332	-1.36734	0.0675599	0.69424
C02B8.1	9.02927	-2.17303	1.59064	-1.36614	0.0678023	0.69424
C40A11.10	252.47	-0.707962	0.51836	-1.36577	0.0678759	0.69424
cyn-5	6955.15	-0.584706	0.428208	-1.36547	0.0679362	0.69424
rps-11	3721.54	-0.449433	0.32917	-1.36535	0.0679607	0.69424
rps-8	4321.6	-0.432857	0.316654	-1.36697	0.0676344	0.69424
wdr-5.3	229.125	0.622045	0.455164	1.36664	0.0677012	0.69424
C30G12.6	187.575	0.750395	0.549679	1.36515	0.0680012	0.69424
F25H2.7	39.6054	1.16169	0.849593	1.36735	0.0675583	0.69424
F49E2.2	15.0381	1.21086	0.885622	1.36724	0.0675801	0.69424
Y53G8AR.7	3.4737	-2.35695	1.72846	-1.36362	0.0683106	0.694772
W03C9.2	346.39	0.617586	0.45281	1.3639	0.0682541	0.694772
C28A5.1	193.908	0.632601	0.46368	1.3643	0.0681718	0.694772
ceh-22	61.8459	0.689458	0.506017	1.36252	0.0685336	0.694772
F57G9.3	120.394	0.819167	0.601117	1.36274	0.0684884	0.694772
mai-1	29.828	1.01795	0.747198	1.36235	0.0685676	0.694772
Y76B12C.8	26.9534	1.03217	0.757204	1.36313	0.0684101	0.694772
sdz-23	11.8314	1.57266	1.15367	1.36318	0.0683999	0.694772
C04E6.7	4.23263	2.06633	1.51679	1.36231	0.0685764	0.694772
F10D11.2	650.989	0.388438	0.285222	1.36188	0.0686631	0.695061
F11D5.1	493.303	0.318411	0.233996	1.36075	0.0688931	0.696347
eat-6	760.872	0.844652	0.620754	1.36069	0.0689066	0.696347
gop-2	1092.82	0.303528	0.22316	1.36013	0.0690193	0.696896
ifo-1	185.759	0.623097	0.458213	1.35984	0.069079	0.696911
Y47H9C.8	868.015	0.272263	0.200298	1.35929	0.0691918	0.69746
W02B12.1	12.0403	-1.29004	0.949983	-1.35796	0.0694648	0.699003
ccb-1	103.552	-0.542181	0.399342	-1.35769	0.0695203	0.699003
bed-1	1032.65	0.392015	0.288686	1.35793	0.0694705	0.699003
C52E2.3	8.98058	-1.72429	1.27066	-1.357	0.0696612	0.699831
F28B1.5	1.7506	-4.11266	3.03177	-1.35652	0.0697599	0.700234
M01E11.3	32.5195	-1.09107	0.804621	-1.35601	0.0698662	0.700714
F54H12.5	220.865	0.616777	0.454992	1.35558	0.069955	0.701016
K12C11.7	11.4323	-1.97128	1.45458	-1.35522	0.0700284	0.701163
rol-1	1.62978	-4.47136	3.30275	-1.35383	0.0703171	0.70128
let-607	1323.53	0.370432	0.273598	1.35393	0.0702957	0.70128
pde-12	423.254	0.448238	0.331055	1.35397	0.0702879	0.70128
C24H12.1	162.976	0.727363	0.536878	1.3548	0.0701155	0.70128
C49A9.9	3.06198	2.73377	2.0194	1.35375	0.0703333	0.70128
F15A8.4	5.58997	-3.33799	2.46792	-1.35255	0.0705824	0.702627
Y23H5B.1	76.2149	-0.931067	0.688388	-1.35253	0.070586	0.702627
lips-9	2.47165	-2.70516	2.0017	-1.35143	0.0708151	0.703126
spe-47	4.29288	-2.31355	1.71236	-1.35109	0.0708866	0.703126
ZK455.5	3.65705	-2.22916	1.64935	-1.35154	0.0707933	0.703126
ubc-19	748.547	0.367417	0.271838	1.35161	0.0707789	0.703126
C39D10.2	4.50724	1.93407	1.43171	1.35088	0.0709302	0.703126
Y6B3B.7	13.3507	-1.30141	0.963874	-1.35018	0.0710762	0.703407
T19B10.2	993.148	-0.528633	0.391447	-1.35046	0.0710182	0.703407
best-19	77.7955	0.673915	0.499727	1.34857	0.071415	0.706176
M04C9.4	6.27928	-2.31386	1.71847	-1.34646	0.0718582	0.70694
Y53C12A.10	332.856	-0.692858	0.514572	-1.34647	0.0718555	0.70694
rpl-2	1275.16	-0.384764	0.285499	-1.34769	0.0715996	0.70694
W06B4.2	409.133	0.404096	0.299909	1.3474	0.0716613	0.70694
Y38H6A.5	8.23743	1.42615	1.05859	1.34721	0.0716999	0.70694
R10H1.1	4.95483	2.12558	1.57923	1.34595	0.0719653	0.70694
ZK550.2	3.11198	2.6733	1.9856	1.34635	0.0718827	0.70694
T22B2.6	2.01643	2.98108	2.21451	1.34616	0.0719229	0.70694
T01G5.7	33.132	-1.56173	1.16108	-1.34506	0.0721543	0.708214
B0432.6	253.131	0.585907	0.435778	1.34451	0.0722711	0.708779
F53B2.8	8.28088	2.0886	1.55579	1.34247	0.0727051	0.712451
del-2	29.4589	1.0364	0.772201	1.34214	0.0727755	0.712556
ndx-2	59.5404	-0.730686	0.544558	-1.3418	0.0728483	0.712685
best-20	9.11307	-2.57165	1.91719	-1.34136	0.0729418	0.713017
glr-1	15.1209	-2.1462	1.60063	-1.34084	0.0730522	0.713243
T26E3.8	378.839	0.747887	0.557836	1.34069	0.0730843	0.713243
F08F3.8	3.87327	-2.44609	1.8257	-1.33981	0.0732738	0.713559
dao-6	3.18478	-2.40995	1.79924	-1.33943	0.0733554	0.713559
C28A5.6	33.6701	-0.703811	0.525444	-1.33946	0.0733483	0.713559
syg-1	112.26	-0.672002	0.501556	-1.33984	0.0732679	0.713559
ZK1240.3	45.8034	-0.95419	0.712793	-1.33866	0.07352	0.713998
bed-3	74.7993	0.672142	0.50209	1.33869	0.0735144	0.713998
fbxb-26	873.514	0.452644	0.338313	1.33794	0.0736745	0.714917
lev-8	13.3838	1.53215	1.14642	1.33646	0.073994	0.717435
sma-6	40.1174	-1.29276	0.969438	-1.33351	0.0746349	0.720253
K01F9.2	15.6066	-1.03342	0.774481	-1.33434	0.0744541	0.720253
ric-3	33.8684	-0.994448	0.745403	-1.33411	0.0745048	0.720253
F36D4.5	1141.05	0.405176	0.30375	1.33391	0.0745475	0.720253
F56A8.9	85.1008	0.571283	0.428066	1.33457	0.0744049	0.720253
ttr-16	81.364	0.94724	0.710363	1.33346	0.0746461	0.720253
F52H2.4	4.48818	-2.34275	1.75743	-1.33305	0.0747352	0.720532
C04G6.5	3.2364	-2.45396	1.84222	-1.33206	0.0749503	0.722023
C37A2.7	2580.43	-0.355129	0.266708	-1.33153	0.0750675	0.72257
K07C11.10	40.2279	-0.896911	0.674331	-1.33008	0.0753858	0.72476
Y5F2A.4	677.346	-0.321412	0.241675	-1.32994	0.0754163	0.72476
K03H1.13	226.61	0.67007	0.504382	1.3285	0.075733	0.727219
R102.11	6.14293	-2.70605	2.03899	-1.32715	0.0760292	0.728869
asp-10	3.90043	-2.38685	1.79871	-1.32698	0.0760689	0.728869
bag-1	1117.3	-0.45517	0.343035	-1.32689	0.0760877	0.728869
R05F9.6	344.294	0.49489	0.373173	1.32617	0.0762477	0.729817
W07G1.5	9.95346	-1.3945	1.05247	-1.32497	0.0765126	0.730598
ZK688.11	209.663	0.643159	0.485363	1.32511	0.0764827	0.730598
Y57A10A.14	88.5713	0.699483	0.52783	1.32521	0.0764611	0.730598
arrd-11	2.79393	-2.7044	2.04162	-1.32463	0.0765888	0.730742
F23F12.8	20.9294	1.07345	0.810796	1.32395	0.076741	0.73161
fbxb-33	301.739	0.52411	0.396057	1.32332	0.0768806	0.73199
ccz-1	260.625	0.543039	0.410392	1.32322	0.0769033	0.73199
taf-6.2	1239.95	0.309765	0.234217	1.32256	0.0770506	0.732808
asfl-1	272.656	-0.732484	0.553976	-1.32223	0.0771236	0.732919
W03D8.3	4.1947	-2.63142	1.99159	-1.32126	0.0773408	0.733486
F54F7.6	106.43	-1.2052	0.912014	-1.32147	0.0772941	0.733486
cnc-10	286.537	-0.588066	0.445195	-1.32092	0.0774179	0.733486
pfd-1	1335.47	-0.411371	0.311439	-1.32087	0.0774286	0.733486
K09F6.3	1.76364	-3.27771	2.48532	-1.31883	0.077888	0.73687
sre-37	3.88379	-3.13768	2.37943	-1.31867	0.077924	0.73687
ZK354.2	6.63888	-1.88355	1.42887	-1.31821	0.0780273	0.73687
alg-1	3323.14	0.335454	0.254481	1.31819	0.0780324	0.73687
nmr-2	2.29426	-2.52542	1.91664	-1.31763	0.0781589	0.737482
tomm-7	210.888	-0.594129	0.451028	-1.31728	0.0782385	0.737651
adt-1	24.9153	-1.3295	1.01055	-1.31563	0.0786125	0.740593
Y45F3A.1	32.0305	-1.05922	0.805314	-1.31529	0.0786901	0.74074
F07G6.8	4.57412	2.24844	1.71097	1.31413	0.0789526	0.742043
med-2	3.1031	2.67097	2.03236	1.31422	0.0789335	0.742043
clec-263	2.11133	2.79397	2.12686	1.31366	0.0790608	0.742476
sqst-1	5172.22	0.387735	0.295328	1.3129	0.0792349	0.743232
F45D3.1	192.518	1.19039	0.906785	1.31276	0.0792657	0.743232
rab-3	20.804	1.14802	0.874832	1.31228	0.0793756	0.74368
Y45G12C.1	5.82727	-2.01162	1.53495	-1.31054	0.0797738	0.744706
rps-7	5163.51	-0.389364	0.296884	-1.3115	0.0795544	0.744706
vps-53	932.895	0.373817	0.285259	1.31045	0.0797966	0.744706
F53H4.3	6.47332	1.65983	1.2666	1.31046	0.0797935	0.744706
C50H2.13	3.61399	2.10252	1.60438	1.31049	0.0797871	0.744706
T05D4.5	2.86636	-2.59864	1.98382	-1.30991	0.0799188	0.745265
Y51H7BR.8	3.45461	-2.71643	2.0759	-1.30856	0.080232	0.745694
cdk-4	1203.3	0.337848	0.258051	1.30923	0.0800763	0.745694
unc-30	131.435	0.588419	0.449583	1.30881	0.0801732	0.745694
ced-11	663.868	0.654639	0.500053	1.30914	0.080097	0.745694
tax-2	3.129	2.30091	1.75862	1.30836	0.0802767	0.745694
F23H12.5	16.4164	-1.38069	1.05559	-1.30798	0.0803654	0.745938
F33D4.6	23.3805	-1.49549	1.14393	-1.30733	0.0805163	0.746093
sqv-6	192.811	-1.12626	0.861306	-1.30762	0.0804474	0.746093
pinn-4	305.847	-0.430888	0.329652	-1.3071	0.0805693	0.746093
C17B7.10	1.96782	-3.58949	2.7555	-1.30266	0.0816025	0.746529
T27A10.5	2.27064	-3.28591	2.52231	-1.30274	0.0815849	0.746529
F10D11.6	3.72971	-2.52836	1.93898	-1.30396	0.0812983	0.746529
C53C11.1	9.9176	-2.01693	1.5452	-1.30529	0.0809896	0.746529
T25G12.6	4.99995	-1.91993	1.47326	-1.30318	0.0814805	0.746529
F23C8.13	18.1134	-1.1253	0.863313	-1.30347	0.0814144	0.746529
Y41C4A.12	21.2424	-0.894602	0.686778	-1.30261	0.0816155	0.746529
pgrn-1	200.653	-0.510031	0.391334	-1.30332	0.0814496	0.746529
F47B10.9	433.767	0.377386	0.289495	1.3036	0.0813829	0.746529
Y55F3AM.13	1060.61	0.466904	0.35826	1.30326	0.0814635	0.746529
fbxb-1	237.933	0.558165	0.427466	1.30575	0.0808811	0.746529
Y57A10C.1	141.338	0.763015	0.585497	1.30319	0.0814789	0.746529
T16G12.8	495.86	0.835343	0.639956	1.30531	0.080984	0.746529
C18C4.7	36.7627	0.910272	0.697975	1.30416	0.081252	0.746529
C43D7.8	66.1743	0.921041	0.707059	1.30264	0.0816084	0.746529
paqr-3	3.29595	2.41797	1.85513	1.30339	0.0814314	0.746529
Y11D7A.3	80.4045	0.765592	0.588559	1.30079	0.0820419	0.749855
R05D3.8	382.983	0.40221	0.309487	1.2996	0.0823217	0.751838
ZK287.7	186.457	-0.540573	0.416211	-1.2988	0.0825116	0.752997
nlp-31	609.162	-0.623869	0.480548	-1.29825	0.0826418	0.753036
K04F10.2	41.2827	0.730422	0.56262	1.29825	0.0826407	0.753036
T27E9.6	61.2173	-1.50155	1.15814	-1.29652	0.0830511	0.753892
F36H12.2	45.4755	-0.91802	0.707786	-1.29703	0.0829295	0.753892
F39G3.2	73.4132	0.8485	0.654066	1.29727	0.0828733	0.753892
mca-2	60.6569	1.15197	0.888323	1.29679	0.0829874	0.753892
ZK673.11	4.84766	1.84782	1.42518	1.29655	0.0830438	0.753892
mrps-24	370.751	-0.440335	0.339835	-1.29573	0.0832388	0.755022
R10D12.10	1.79487	-3.974	3.07279	-1.29329	0.0838216	0.75643
C07A12.2	1.69678	-3.75684	2.90455	-1.29343	0.0837871	0.75643
cpr-1	2.46221	-3.60944	2.78995	-1.29373	0.083716	0.75643
F31F7.2	2.8835	-2.94577	2.27785	-1.29322	0.0838369	0.75643
twk-39	15.0582	-1.86033	1.43749	-1.29415	0.0836151	0.75643
pdi-2	9296.41	-0.679868	0.525439	-1.29391	0.0836736	0.75643
ccch-2	517.082	0.416293	0.321586	1.2945	0.0835321	0.75643
K01A12.3	2.54932	-2.92341	2.26179	-1.29252	0.0840058	0.75684
T05E7.3	577.222	0.514702	0.39822	1.29251	0.084009	0.75684
W09C5.1	1428.49	-0.496991	0.384674	-1.29198	0.0841352	0.757407
C46H11.10	19.8042	-1.12444	0.870843	-1.29121	0.0843206	0.758505
B0391.14	47.5953	0.851138	0.659348	1.29088	0.0843995	0.758643
zip-9	172.877	0.889006	0.688969	1.29034	0.0845287	0.759235
Y6D1A.1	1376.73	-0.392206	0.304108	-1.28969	0.0846852	0.760069
mab-3	3.18172	-2.41331	1.87403	-1.28777	0.0851512	0.760096
C35B1.8	4.8879	-1.88597	1.46504	-1.28732	0.0852598	0.760096
T26F2.3	7.80457	-1.72224	1.33767	-1.28749	0.0852181	0.760096
ZC123.1	17.5216	-1.69589	1.31766	-1.28705	0.0853241	0.760096
F52G3.5	25.5657	-1.20365	0.934509	-1.28801	0.085093	0.760096
ogt-1	5050.52	0.338236	0.262459	1.28872	0.0849205	0.760096
pqn-41	4362.47	0.384932	0.298834	1.28811	0.0850674	0.760096
D1043.1	1173.2	0.429687	0.3338	1.28726	0.0852744	0.760096
C36B1.9	476.668	0.569525	0.441978	1.28858	0.084954	0.760096
scav-1	29.6292	1.03701	0.804306	1.28932	0.0847753	0.760096
sor-3	937.61	0.325867	0.253316	1.28641	0.0854815	0.760179
ZK899.6	258.603	0.542341	0.421652	1.28623	0.0855241	0.760179
lgc-44	3.88382	2.10255	1.63435	1.28647	0.0854652	0.760179
tag-250	414.057	0.432568	0.336428	1.28577	0.0856369	0.760616
W07E6.5	8.38773	-1.98496	1.54635	-1.28364	0.0861556	0.761264
rgs-10	40.9407	-1.07603	0.83774	-1.28444	0.0859604	0.761264
ptl-1	61.4651	-0.771725	0.600866	-1.28435	0.0859816	0.761264
polk-1	379.022	-0.504679	0.392985	-1.28422	0.0860145	0.761264
fbxb-31	217.237	0.581412	0.452897	1.28376	0.0861266	0.761264
C54G4.7	119.237	0.690401	0.537587	1.28426	0.0860046	0.761264
R11G10.3	7.47624	2.55294	1.98861	1.28378	0.0861207	0.761264
C05B5.11	3.52244	-2.18558	1.70321	-1.28321	0.0862608	0.76163
fic-1	262.586	-0.718205	0.559881	-1.28278	0.0863667	0.762003
C09G5.7	80.6398	-0.786494	0.613821	-1.28131	0.086728	0.762725
sodh-1	61.7969	-0.655521	0.511874	-1.28063	0.0868952	0.762725
Y71H2AM.4	1043.5	-0.383152	0.29905	-1.28123	0.086747	0.762725
fbxb-75	1320.05	0.596651	0.465797	1.28092	0.0868224	0.762725
Y41D4A.3	441.695	0.651327	0.508579	1.28068	0.0868829	0.762725
mboa-2	98.9426	0.784112	0.612232	1.28074	0.0868673	0.762725
ftn-1	14.8037	1.29613	1.01173	1.2811	0.0867804	0.762725
C01F6.16	5.18448	2.0466	1.59909	1.27985	0.087087	0.763849
F16B4.4	4.01941	-2.11654	1.65583	-1.27823	0.0874876	0.763886
F19H8.2	8.01837	-1.84186	1.44063	-1.27851	0.087418	0.763886
hhat-1	58.1955	-0.805161	0.630004	-1.27803	0.0875385	0.763886
C05D10.4	156.372	-0.586297	0.458586	-1.27849	0.0874242	0.763886
lsm-5	1015.48	-0.44192	0.345481	-1.27914	0.0872615	0.763886
fbxb-16	78.4092	0.597355	0.467111	1.27883	0.0873396	0.763886
T11F8.1	74.5408	0.875769	0.684559	1.27932	0.0872187	0.763886
cec-8	4260.11	-0.44694	0.349839	-1.27756	0.0876538	0.764333
col-85	3.68099	-3.29134	2.58217	-1.27464	0.0883808	0.764998
F54C9.7	4.41175	-2.50314	1.96379	-1.27464	0.0883802	0.764998
F46F2.5	7.09521	-1.5237	1.19583	-1.27417	0.0884979	0.764998
C30G12.1	8.757	-1.25002	0.979641	-1.276	0.0880418	0.764998
T21F4.1	68.7787	-0.569067	0.446577	-1.27429	0.0884695	0.764998
T24D1.2	923.706	-0.555205	0.435486	-1.27491	0.0883137	0.764998
sec-24.2	1710.6	0.359635	0.282072	1.27498	0.0882969	0.764998
seld-1	191.285	0.513042	0.402488	1.27468	0.0883715	0.764998
tsr-1	911.526	0.535492	0.419445	1.27667	0.0878758	0.764998
F53A3.7	75.5874	0.603513	0.473642	1.2742	0.0884913	0.764998
H03G16.5	67.4087	0.726529	0.569188	1.27643	0.0879341	0.764998
tre-3	11.7164	1.365	1.0694	1.27642	0.0879377	0.764998
cpz-1	388.861	-0.672406	0.528411	-1.27251	0.0889149	0.768047
srh-69	2.05731	-3.92694	3.08811	-1.27163	0.0891351	0.768392
K02D10.1	631.676	-0.349369	0.2748	-1.27136	0.0892041	0.768392
cox-15	259.513	0.491048	0.386249	1.27132	0.0892119	0.768392
bath-1	110.757	0.581025	0.456965	1.27149	0.0891708	0.768392
T25D3.3	7.00612	-2.0107	1.58257	-1.27053	0.0894126	0.76846
Y57A10A.10	129.06	-0.66144	0.520557	-1.27064	0.0893846	0.76846
C06E2.1	7.86541	1.31922	1.03825	1.27062	0.0893897	0.76846
ZC328.2	5.31896	-2.37967	1.87426	-1.26966	0.0896328	0.768589
nhr-148	17.7978	-1.03876	0.819073	-1.26821	0.0899976	0.768589
K05F1.5	413.88	-0.716851	0.564523	-1.26984	0.0895873	0.768589
mspn-1	265.058	-0.650771	0.51266	-1.2694	0.089697	0.768589
R02D5.8	87.6271	-0.611493	0.482056	-1.26851	0.0899224	0.768589
mrpl-10	498.838	-0.438126	0.345084	-1.26962	0.0896414	0.768589
sdz-16	390.812	0.402006	0.316994	1.26818	0.0900062	0.768589
F34D6.1	439.865	0.412329	0.324944	1.26892	0.0898176	0.768589
cdka-1	14.3446	1.82903	1.44163	1.26873	0.0898679	0.768589
fbxb-84	893.362	0.467583	0.368929	1.26741	0.0902025	0.769716
inx-17	53.6725	0.862511	0.680715	1.26707	0.090289	0.769904
Y57A10A.5	85.8275	-0.906659	0.715726	-1.26677	0.0903647	0.77
F09E5.14	9.52433	-1.4577	1.15143	-1.26599	0.0905635	0.770706
F49E8.6	35.1384	-0.841412	0.664656	-1.26594	0.0905765	0.770706
utx-1	2841.63	0.481512	0.380455	1.26562	0.0906563	0.770836
Y79H2A.4	9.83488	-1.73713	1.37352	-1.26473	0.0908839	0.771674
rsp-5	2729.09	-0.443369	0.350552	-1.26478	0.0908724	0.771674
F20B10.3	2.14235	-2.89953	2.29644	-1.26262	0.0914244	0.773608
W03H9.1	4.09388	-2.61572	2.07173	-1.26258	0.0914352	0.773608
F28H1.4	3.17613	-2.32194	1.8385	-1.26295	0.0913384	0.773608
acs-1	157.879	0.558456	0.442127	1.26311	0.091298	0.773608
F41G3.18	2.4516	2.91986	2.31088	1.26353	0.0911916	0.773608
C28A5.2	251.097	0.597822	0.474033	1.26114	0.0918051	0.776188
cdk-9	922.829	0.284732	0.225984	1.25997	0.0921075	0.778194
F53H2.3	758.679	0.620989	0.493259	1.25895	0.0923698	0.779859
ZK822.2	810.13	-0.544836	0.433131	-1.2579	0.0926419	0.7803
sao-1	973.483	-0.464274	0.368937	-1.25841	0.0925096	0.7803
cgh-1	3427.06	0.384762	0.305836	1.25807	0.0925983	0.7803
T19D2.2	15.1121	1.05929	0.842217	1.25774	0.0926831	0.7803
ZK177.8	327	-0.748591	0.596032	-1.25596	0.0931472	0.783655
Y69A2AR.19	33.9359	-2.5014	1.9928	-1.25522	0.09334	0.784345
crls-1	580.943	0.336126	0.2678	1.25514	0.0933604	0.784345
sri-54	2.92551	-3.27426	2.61016	-1.25443	0.0935455	0.784797
atln-1	3100.96	0.285329	0.227437	1.25454	0.0935174	0.784797
col-33	1.93044	-3.19883	2.55396	-1.2525	0.0940515	0.785148
Y53F4B.23	2.176	-3.07944	2.46006	-1.25177	0.0942422	0.785148
tag-140	1.9886	-2.87759	2.2972	-1.25265	0.0940122	0.785148
daf-10	43.7861	-0.891624	0.711364	-1.2534	0.0938149	0.785148
kcc-2	77.761	-0.817772	0.653397	-1.25157	0.0942955	0.785148
pha-2	58.2269	-0.692781	0.553553	-1.25152	0.0943097	0.785148
ras-2	170.354	-0.545381	0.435277	-1.25295	0.093933	0.785148
R07B7.10	338.792	0.449869	0.359158	1.25256	0.0940344	0.785148
math-24	21.8941	1.17632	0.938655	1.2532	0.093868	0.785148
fbxc-35	9.36385	1.69015	1.34886	1.25302	0.0939152	0.785148
C18H2.5	3.54687	2.26487	1.80944	1.2517	0.0942629	0.785148
T28F12.1	6.3193	-1.96338	1.57023	-1.25037	0.0946114	0.785432
sfxn-1.2	7.33447	-1.66316	1.32999	-1.25051	0.0945751	0.785432
tbc-16	14.207	-1.12475	0.899144	-1.25091	0.09447	0.785432
glod-4	696.634	-0.351698	0.281252	-1.25047	0.0945851	0.785432
lin-10	2607.65	0.400121	0.320077	1.25008	0.094689	0.785432
K05F6.4	804.636	0.451454	0.361195	1.24989	0.0947381	0.785432
Y47G6A.25	107.546	-0.850014	0.680208	-1.24964	0.0948048	0.785441
T08B6.4	1.96061	-3.06596	2.45733	-1.24768	0.095324	0.78545
T16G12.10	1.72025	-2.90417	2.33718	-1.2426	0.0966797	0.78545
Y54E2A.7	4.78433	-2.66308	2.1433	-1.24251	0.0967028	0.78545
acr-8	4.19666	-2.63781	2.11297	-1.24839	0.0951345	0.78545
R10E9.2	1210.96	-2.19191	1.76203	-1.24397	0.0963123	0.78545
C17F4.2	5.14643	-2.14985	1.72307	-1.24769	0.0953211	0.78545
T20F7.5	4.16385	-2.04657	1.6462	-1.24321	0.0965171	0.78545
T19A6.4	7.43144	-2.0152	1.61852	-1.24509	0.0960131	0.78545
ver-1	22.6134	-1.88048	1.51045	-1.24498	0.0960421	0.78545
nhx-1	18.7097	-1.2389	0.99593	-1.24397	0.0963133	0.78545
cbd-1	1744.35	-1.07012	0.858882	-1.24594	0.0957854	0.78545
F20C5.3	208.586	-0.957932	0.770361	-1.24349	0.0964422	0.78545
C37H5.2	25.056	-0.945207	0.75731	-1.24811	0.0952092	0.78545
F32D1.3	85.4975	-0.827044	0.665704	-1.24236	0.096744	0.78545
F31D4.9	820.608	-0.459583	0.367956	-1.24902	0.0949697	0.78545
rps-16	4585.14	-0.430388	0.346423	-1.24238	0.0967395	0.78545
asg-2	629.768	-0.39177	0.314201	-1.24688	0.0955369	0.78545
fbxc-28	1928.5	0.346516	0.278876	1.24254	0.0966944	0.78545
tag-325	2063.1	0.414924	0.333184	1.24533	0.095949	0.78545
W07E11.1	6635.78	0.454578	0.364357	1.24762	0.0953402	0.78545
prx-3	293.935	0.489373	0.392769	1.24595	0.0957827	0.78545
Y56A3A.6	262.666	0.528984	0.425831	1.24224	0.0967768	0.78545
K08B12.1	56.8632	0.688942	0.552614	1.2467	0.0955853	0.78545
T23G5.3	39.4253	0.762284	0.61034	1.24895	0.0949874	0.78545
T28C12.4	134.559	0.854442	0.685674	1.24614	0.0957344	0.78545
fog-1	53.0296	0.890146	0.71451	1.24581	0.0958203	0.78545
T12D8.5	13.9253	1.29569	1.04223	1.24318	0.096523	0.78545
F53B1.6	17.2078	1.35931	1.09036	1.24666	0.0955934	0.78545
twk-46	13.0522	1.52454	1.22176	1.24782	0.0952867	0.78545
C39D10.7	5.56316	2.01898	1.6243	1.24299	0.0965754	0.78545
egg-2	57.7741	-1.76007	1.41738	-1.24177	0.0969014	0.785647
F52C6.3	10.4753	-1.67522	1.34952	-1.24135	0.0970165	0.785647
lon-1	10.5024	-1.47601	1.18921	-1.24117	0.0970641	0.785647
pfn-2	281.368	-0.518979	0.41811	-1.24125	0.0970422	0.785647
bli-3	68.8769	-1.22081	0.983944	-1.24073	0.0971819	0.786069
Y50D7A.3	715.842	-0.492914	0.397598	-1.23973	0.0974521	0.787189
ctbp-1	167.745	-0.384185	0.309877	-1.2398	0.0974347	0.787189
Y77E11A.14	18.2577	-0.939945	0.758632	-1.239	0.0976497	0.787665
rpl-7A	1361.41	-0.361706	0.291985	-1.23878	0.0977087	0.787665
metr-1	1262.46	0.428643	0.346017	1.23879	0.0977062	0.787665
F38A1.15	3.56128	-2.32721	1.8794	-1.23828	0.0978461	0.788012
R144.3	398.196	-0.385703	0.311519	-1.23814	0.0978836	0.788012
R12B2.3	16.5928	-1.80684	1.46139	-1.23638	0.0983606	0.789932
mig-17	10.6849	-1.55361	1.25667	-1.23629	0.0983864	0.789932
oig-2	10.0621	-1.37562	1.11245	-1.23657	0.0983088	0.789932
C08A9.8	13.4295	1.68125	1.35934	1.23681	0.0982431	0.789932
C27A7.5	299.729	0.408816	0.330909	1.23543	0.098619	0.790738
dsc-1	4.97531	1.50997	1.22221	1.23544	0.0986158	0.790738
Y55B1BR.1	4.34964	-2.57556	2.08527	-1.23512	0.0987037	0.790778
C41G7.3	97.6719	0.925185	0.749181	1.23493	0.0987563	0.790778
F10D2.12	10.4674	-1.6769	1.35899	-1.23393	0.0990296	0.791905
ddo-2	22.0833	-0.956695	0.775213	-1.23411	0.0989814	0.791905
ZC239.4	1.78372	-4.67223	3.79496	-1.23117	0.0997874	0.792225
btb-5	1.16945	-3.48789	2.83116	-1.23197	0.0995673	0.792225
clec-86	3.7952	-2.53973	2.0619	-1.23174	0.0996293	0.792225
glb-6	4.17482	-2.3358	1.89562	-1.23221	0.0995015	0.792225
clec-85	14.1455	-1.3182	1.06996	-1.232	0.0995577	0.792225
F59C6.11	14.4379	-1.15384	0.935783	-1.23302	0.099278	0.792225
F25B5.3	203.164	-0.602739	0.48987	-1.23041	0.0999973	0.792225
rps-25	3359.57	-0.520636	0.423043	-1.23069	0.0999182	0.792225
R12E2.13	486.988	-0.511716	0.41583	-1.23059	0.0999467	0.792225
Y56A3A.33	591.962	0.463365	0.376318	1.23131	0.0997473	0.792225
T12A2.1	89.9429	0.480815	0.390731	1.23055	0.0999568	0.792225
oxi-1	497.282	0.570908	0.463974	1.23047	0.0999783	0.792225
cdr-7	31.4704	0.797397	0.647569	1.23137	0.0997317	0.792225
C35A5.5	3.8484	2.10001	1.70647	1.23062	0.0999393	0.792225
npp-13	4235.28	0.428076	0.348019	1.23004	0.100099	0.792509
ent-4	2.36632	-3.04864	2.48388	-1.22737	0.100836	0.794129
pho-7	3.43403	-2.62345	2.13786	-1.22714	0.100902	0.794129
Y75B8A.33	2.82407	-2.31894	1.88761	-1.22851	0.100522	0.794129
gcy-34	11.6958	-1.40392	1.1431	-1.22817	0.100616	0.794129
rol-3	46.7991	-1.06317	0.865366	-1.22858	0.100502	0.794129
K08F4.3	99.6975	-0.7578	0.617252	-1.2277	0.100746	0.794129
F54F2.7	159.062	-0.377811	0.307671	-1.22797	0.100671	0.794129
crn-4	284.429	0.427833	0.348585	1.22734	0.100845	0.794129
C27F2.1	29.9655	1.151	0.937554	1.22766	0.100757	0.794129
rps-6	2524.88	-0.413455	0.337024	-1.22678	0.101	0.794382
C34F11.5	2.46143	-2.84969	2.32462	-1.22587	0.101253	0.795097
ZC155.4	224.042	-1.11256	0.90819	-1.22503	0.101488	0.795097
Y54G2A.23	1001.74	-0.471411	0.384471	-1.22613	0.101182	0.795097
fbxb-53	247.681	0.563719	0.46017	1.22502	0.10149	0.795097
pha-1	529.959	0.658547	0.537578	1.22503	0.101489	0.795097
T28D6.4	79.2537	1.0713	0.874361	1.22524	0.101431	0.795097
frm-5.1	267.244	0.522611	0.426727	1.2247	0.101581	0.795289
Y59E9AL.36	555.576	-0.608955	0.497513	-1.224	0.101777	0.795867
C24D10.4	495.149	0.364953	0.298175	1.22396	0.101788	0.795867
ZK813.6	6.20914	-1.81498	1.48376	-1.22324	0.10199	0.796921
taf-11.3	362.145	-0.460083	0.376414	-1.22228	0.102259	0.796939
H18N23.2	308.316	-0.428699	0.35071	-1.22238	0.102231	0.796939
acs-19	579.833	0.68718	0.562035	1.22266	0.10215	0.796939
F46G11.1	3.23306	1.94508	1.59046	1.22297	0.102066	0.796939
T13C5.3	6.93635	-1.55504	1.27302	-1.22153	0.102468	0.797058
F55G7.1	9.41915	-1.35175	1.10654	-1.2216	0.102449	0.797058
Y37H9A.3	984.169	0.333677	0.273167	1.22151	0.102474	0.797058
fbxa-64	74.4845	0.650576	0.533007	1.22058	0.102737	0.798584
C45G9.13	2.98968	-3.00027	2.463	-1.21814	0.103426	0.799596
B0034.1	1.58758	-2.63609	2.16347	-1.21845	0.103337	0.799596
svh-1	5.87878	-2.01485	1.65373	-1.21837	0.103361	0.799596
fbxa-19	6.47955	-1.83291	1.50328	-1.21927	0.103105	0.799596
cng-1	7.25147	-1.48397	1.21827	-1.21809	0.103439	0.799596
atgp-2	80.7225	-0.75401	0.618757	-1.21859	0.103298	0.799596
Y47G6A.9	471.795	-0.382034	0.313661	-1.21799	0.103469	0.799596
tiar-2	1596.67	-0.292698	0.240169	-1.21872	0.103263	0.799596
apb-1	3144.69	0.367015	0.301268	1.21823	0.103399	0.799596
ugt-20	27.7984	-1.28681	1.05779	-1.21651	0.103889	0.800578
Y55F3BR.7	34.3308	-0.958721	0.78777	-1.21701	0.103747	0.800578
R10E12.2	309.269	-0.574958	0.472634	-1.2165	0.103891	0.800578
cic-1	433.589	0.323456	0.265827	1.21679	0.103807	0.800578
lin-35	5398.23	0.341528	0.28078	1.21636	0.103931	0.800578
B0286.3	80.8847	-0.638866	0.525363	-1.21605	0.104019	0.800742
R151.4	6.7451	-1.74843	1.43811	-1.21578	0.104095	0.800751
Y18D10A.11	342.116	-0.645666	0.531162	-1.21557	0.104155	0.800751
Y48C3A.3	13.2457	-1.22565	1.00946	-1.21417	0.104555	0.803315
trpp-1	238.733	0.601692	0.49574	1.21373	0.104682	0.803772
srsx-7	1.60087	-4.03768	3.33082	-1.21222	0.105114	0.806569
fbxb-44	380.01	0.645538	0.532659	1.21192	0.105201	0.806717
col-120	4.4789	-2.09498	1.72968	-1.21119	0.105408	0.807306
Y10G11A.1	437.08	0.445135	0.367522	1.21118	0.105412	0.807306
dhs-14	2.06156	-4.00132	3.30677	-1.21004	0.10574	0.807745
F26H9.5	3710.04	0.325254	0.268663	1.21064	0.105568	0.807745
amx-3	54.7244	0.64104	0.529765	1.21004	0.105739	0.807745
F47B8.10	11.9677	1.26125	1.04213	1.21026	0.105675	0.807745
F10E9.1	1.72261	-3.09422	2.55891	-1.20919	0.105985	0.808166
K02E10.5	2.28497	-2.84628	2.35371	-1.20927	0.105961	0.808166
Y48G1C.5	7.14307	-2.1404	1.77017	-1.20915	0.105998	0.808166
ZK154.4	127.484	-0.642185	0.531267	-1.20878	0.106103	0.808454
T10C6.7	16.0748	1.12964	0.935128	1.208	0.106329	0.809286
lurp-1	7.76308	1.45921	1.20802	1.20794	0.106348	0.809286
Y17G9B.4	15.9482	-1.19977	0.993609	-1.20748	0.106479	0.80977
C37C3.11	1.4994	-4.21528	3.49346	-1.20662	0.10673	0.810162
mcd-1	4520.85	0.331268	0.274642	1.20618	0.106857	0.810162
npp-22	728.32	0.471937	0.391188	1.20642	0.106788	0.810162
fbxb-22	370.885	0.630866	0.523046	1.20614	0.10687	0.810162
irg-1	2.76332	2.33907	1.9384	1.2067	0.106705	0.810162
eif-3.I	1773.26	-0.249738	0.207107	-1.20584	0.106956	0.810305
R05H5.5	198.431	0.535218	0.44402	1.20539	0.107086	0.810734
F13H8.9	55.3104	0.637593	0.529044	1.20518	0.107148	0.810734
fcd-2	1761.27	0.480805	0.399093	1.20474	0.107275	0.811181
Y24D9B.1	3.53351	2.05113	1.70314	1.20432	0.107398	0.811598
F37H8.3	13.7402	1.04447	0.867539	1.20395	0.107507	0.811906
pqn-48	7.6924	-1.76133	1.4642	-1.20293	0.107805	0.812588
K08E3.5	1378.01	0.381196	0.31686	1.20304	0.107772	0.812588
ZK1010.8	20.6991	1.09167	0.907673	1.20271	0.107869	0.812588
Y54G2A.41	5.03025	1.71797	1.42823	1.20286	0.107825	0.812588
gpx-3	2.41016	-2.75676	2.29346	-1.20201	0.108074	0.81362
nhr-58	50.8216	0.725397	0.603636	1.20171	0.108162	0.81377
Y39B6A.13	250.368	0.432909	0.360378	1.20126	0.108294	0.814248
T22B2.5	2.02642	-2.77206	2.30823	-1.20095	0.108387	0.814437
acr-3	2.59765	-4.01334	3.34781	-1.1988	0.109021	0.814942
eff-1	12.47	-1.47053	1.22681	-1.19867	0.109059	0.814942
him-5	60.544	-1.08516	0.905492	-1.19842	0.109132	0.814942
frpr-7	34.5596	-0.819911	0.683883	-1.1989	0.108989	0.814942
fut-3	228.735	-0.617523	0.515287	-1.19841	0.109136	0.814942
his-48	5063.68	-0.453991	0.378669	-1.19891	0.108986	0.814942
odr-8	1190.23	0.24802	0.206775	1.19947	0.108822	0.814942
tag-342	1006.51	0.315547	0.263123	1.19924	0.108891	0.814942
mrpl-51	456.08	0.390914	0.325679	1.20031	0.108576	0.814942
fbxa-59	13.6318	1.11343	0.928294	1.19943	0.108833	0.814942
sgn-1	29.7705	0.788308	0.658063	1.19792	0.10928	0.815504
lin-25	848.326	0.560099	0.467854	1.19717	0.109503	0.816662
tyr-4	12.3594	-1.29475	1.08175	-1.19691	0.10958	0.816727
Y43F8B.3	45.9877	-0.993856	0.831129	-1.19579	0.109912	0.818177
H08J11.2	591.073	0.425755	0.356012	1.1959	0.109878	0.818177
ears-2	199.15	-0.684267	0.572451	-1.19533	0.110049	0.818693
Y47G7B.2	11.3733	-1.64582	1.37811	-1.19426	0.110368	0.820467
prp-21	3924.59	0.420289	0.351981	1.19407	0.110425	0.820467
F22H10.4	22.2377	-1.71533	1.43804	-1.19283	0.110794	0.822186
lgc-21	14.5715	-1.56936	1.31552	-1.19296	0.110754	0.822186
hum-7	110.367	0.854632	0.716873	1.19217	0.110993	0.823151
C17C3.15	8.34107	-1.97908	1.66143	-1.19119	0.111286	0.824304
phy-2	466.805	-0.605579	0.508336	-1.1913	0.111254	0.824304
dmd-8	30.0009	-1.99002	1.67189	-1.19028	0.11156	0.824428
C32B5.7	10.9521	-1.8469	1.552	-1.19002	0.111638	0.824428
Y44A6C.1	431.63	0.333251	0.28014	1.18959	0.111768	0.824428
C29H12.6	57.7154	0.512982	0.431227	1.18959	0.111768	0.824428
cnd-1	319.487	0.586346	0.492642	1.19021	0.111581	0.824428
smd-1	540.958	0.781275	0.65604	1.19089	0.111374	0.824428
Y67D8B.2	9.11263	1.36845	1.15042	1.18953	0.111786	0.824428
F23B2.10	5.09561	-2.11569	1.77952	-1.18892	0.11197	0.825278
D2045.2	4030.7	0.389974	0.328102	1.18857	0.112073	0.825529
gst-9	1.33831	-4.25831	3.58426	-1.18806	0.112229	0.825751
sydn-1	210.229	-0.507233	0.427075	-1.18769	0.112339	0.825751
H20J04.9	56.3574	0.516295	0.43459	1.18801	0.112245	0.825751
tbx-31	36.8867	1.04377	0.878923	1.18756	0.112379	0.825751
lov-1	3.65781	-2.22661	1.87694	-1.1863	0.112762	0.826022
rps-17	2712.37	-0.443339	0.373701	-1.18635	0.112746	0.826022
R10E4.11	711.079	-0.41841	0.352613	-1.1866	0.112671	0.826022
cdc-7	292.506	0.339253	0.285932	1.18648	0.112706	0.826022
C04G6.6	3.08265	2.68988	2.26675	1.18667	0.112649	0.826022
dhhc-7	174.427	-0.74464	0.628119	-1.18551	0.113002	0.826262
mutd-1	583.071	0.367776	0.310209	1.18557	0.112981	0.826262
fbxa-83	304.198	0.49806	0.420078	1.18564	0.112963	0.826262
lpr-2	23.0041	-2.42027	2.04355	-1.18434	0.113355	0.826442
skpo-3	5.0103	-2.33955	1.974	-1.18518	0.113101	0.826442
ZK1236.9	7.778	-1.27225	1.07469	-1.18384	0.11351	0.826442
eva-1	96.8745	-0.530516	0.448113	-1.18389	0.113494	0.826442
pes-10	2169	0.294022	0.248154	1.18483	0.113206	0.826442
hda-10	458.031	0.414062	0.34967	1.18415	0.113415	0.826442
C36B7.1	12.8726	1.13275	0.956319	1.18449	0.11331	0.826442
exc-4	1820.24	0.306855	0.259271	1.18353	0.113603	0.826574
lntl-1	115.119	0.742868	0.627781	1.18332	0.113667	0.826574
C49G9.1	3.37726	-2.79875	2.36946	-1.18118	0.114323	0.828325
fbxa-38	6.24067	-2.3776	2.01204	-1.18168	0.114168	0.828325
enu-3.1	21.2576	-1.22524	1.0369	-1.18163	0.114184	0.828325
rnh-1.0	310.227	-0.442266	0.374342	-1.18145	0.11424	0.828325
vps-45	359.463	0.367821	0.311349	1.18138	0.114262	0.828325
hlh-2	2193.65	0.371194	0.314107	1.18174	0.11415	0.828325
W09G12.7	1.50444	-3.48405	2.98297	-1.16798	0.118426	0.828808
F47B7.7	2.04479	-2.68971	2.28743	-1.17586	0.115962	0.828808
Y39A1A.18	5.82113	-1.95566	1.66975	-1.17123	0.117407	0.828808
Y57A10A.24	5.24981	-1.89273	1.61258	-1.17373	0.116626	0.828808
C26G2.2	7.48685	-1.84004	1.57251	-1.17013	0.117751	0.828808
unc-7	7.04937	-1.77681	1.50589	-1.1799	0.114714	0.828808
R04B3.1	10.0243	-1.55748	1.33069	-1.17043	0.117657	0.828808
F01G10.10	9.38956	-1.38555	1.18179	-1.17242	0.117035	0.828808
F54C8.1	23.667	-1.3218	1.13199	-1.16768	0.118521	0.828808
C33C12.4	9.73373	-1.23422	1.04743	-1.17833	0.115198	0.828808
cutl-18	15.6839	-1.21708	1.04039	-1.16983	0.117844	0.828808
W09C5.12	32.8231	-1.16372	0.992234	-1.17282	0.116907	0.828808
F41B5.1	18.3696	-0.870505	0.744797	-1.16878	0.118174	0.828808
itx-1	48.4717	-0.8141	0.693412	-1.17405	0.116525	0.828808
F18E9.1	32.9327	-0.780778	0.662493	-1.17855	0.115133	0.828808
W10G11.19	35.0711	-0.774617	0.663432	-1.16759	0.118549	0.828808
T04F8.2	254.896	-0.770992	0.653407	-1.17996	0.114698	0.828808
aex-6	27.9464	-0.770059	0.658456	-1.16949	0.11795	0.828808
Y54G2A.11	42.3898	-0.685993	0.584084	-1.17448	0.116392	0.828808
Y57A10A.7	40.1444	-0.683828	0.584165	-1.17061	0.1176	0.828808
C05D11.13	175.91	-0.662401	0.564705	-1.173	0.116851	0.828808
E01G4.5	1499.87	-0.647821	0.549727	-1.17844	0.115164	0.828808
esyt-2	143.903	-0.639665	0.544951	-1.1738	0.116602	0.828808
eef-1B.1	3838.99	-0.62726	0.536491	-1.16919	0.118045	0.828808
aman-1	67.1588	-0.61746	0.525904	-1.17409	0.116512	0.828808
C16A3.6	1238.52	-0.560798	0.476783	-1.17621	0.115853	0.828808
dpy-17	4037.96	-0.493712	0.421705	-1.17075	0.117555	0.828808
dnj-7	615.991	-0.437765	0.374046	-1.17035	0.117681	0.828808
C34B2.8	1893.68	-0.426056	0.361628	-1.17816	0.115251	0.828808
C05A9.2	372.265	-0.405746	0.347431	-1.16785	0.118469	0.828808
rpl-16	3474.32	-0.395468	0.336503	-1.17523	0.116158	0.828808
Y38C1AA.14	177.036	-0.391384	0.331748	-1.17976	0.114758	0.828808
set-12	372.308	-0.379174	0.322428	-1.17599	0.115921	0.828808
rps-19	4051.48	-0.343388	0.293712	-1.16913	0.118065	0.828808
B0491.7	376.858	-0.295984	0.252109	-1.17403	0.116531	0.828808
lin-61	2161.59	0.271784	0.230394	1.17965	0.114793	0.828808
C23H3.3	527.77	0.283302	0.240409	1.17842	0.115172	0.828808
Y57G11C.3	1338.95	0.294203	0.25026	1.17559	0.116046	0.828808
zer-1	1798.71	0.314771	0.269331	1.16871	0.118195	0.828808
amx-1	1821.61	0.339968	0.29042	1.17061	0.1176	0.828808
Y6B3B.9	274.82	0.351325	0.300649	1.16856	0.118245	0.828808
chc-1	7726.36	0.357946	0.305471	1.17178	0.117232	0.828808
ced-4	1378.44	0.372139	0.317453	1.17227	0.117081	0.828808
sas-5	287.17	0.380491	0.325844	1.16771	0.118511	0.828808
nhr-21	124.896	0.408376	0.348513	1.17177	0.117238	0.828808
Y38C9A.1	1158.24	0.534837	0.455167	1.17503	0.116219	0.828808
cyld-1	554.996	0.563882	0.479309	1.17645	0.11578	0.828808
fos-1	99.1587	0.598002	0.507665	1.17795	0.115317	0.828808
scrt-1	77.5352	0.622889	0.529296	1.17683	0.115664	0.828808
C02D5.2	60.7816	0.710468	0.605988	1.17241	0.117036	0.828808
T28C6.10	147.019	1.05207	0.892448	1.17886	0.115034	0.828808
T01D1.4	32.6864	1.33569	1.14227	1.16932	0.118004	0.828808
unc-25	7.55975	1.36397	1.16531	1.17047	0.117642	0.828808
Y39E4B.11	5.61167	1.69115	1.44227	1.17256	0.116991	0.828808
K11H3.2	4.37547	1.77385	1.51924	1.16759	0.11855	0.828808
sto-2	4.58963	2.057	1.75126	1.17458	0.116359	0.828808
ntr-1	3.23777	2.09294	1.7805	1.17548	0.116081	0.828808
Y13C8A.2	9.68624	2.24018	1.90098	1.17844	0.115166	0.828808
Y57G11C.20	3.22332	2.56854	2.19344	1.17101	0.117474	0.828808
F13A2.3	2.17814	3.15678	2.6749	1.18015	0.11464	0.828808
R04B5.6	30.981	-1.19969	1.02865	-1.16627	0.118967	0.831237
F43E2.11	3.24241	-2.62149	2.2482	-1.16604	0.119039	0.83126
gipc-2	2.00152	-3.06295	2.64447	-1.15825	0.121526	0.83149
C02B8.3	2.79308	-2.73977	2.3552	-1.16328	0.119914	0.83149
T26H5.8	2.85281	-2.25698	1.94843	-1.15836	0.12149	0.83149
F16H11.1	5.94185	-2.15677	1.86503	-1.15643	0.122112	0.83149
ace-1	6.28067	-1.97704	1.70718	-1.15807	0.121581	0.83149
F08A8.5	4.68085	-1.80083	1.55755	-1.15619	0.122189	0.83149
Y55F3AM.11	7.13973	-1.70191	1.46781	-1.15949	0.121125	0.83149
T05A7.6	9.42126	-1.66157	1.43615	-1.15696	0.12194	0.83149
F54D5.17	15.0326	-1.65166	1.42759	-1.15696	0.121942	0.83149
gcy-9	8.31761	-1.48897	1.28168	-1.16173	0.120409	0.83149
unc-63	30.6547	-1.48817	1.27686	-1.16549	0.119213	0.83149
F36H2.3	10.5738	-1.26482	1.08916	-1.16127	0.120556	0.83149
acs-9	59.2529	-1.16442	1.0046	-1.15909	0.121255	0.83149
T27C4.1	9.47452	-1.16025	0.996257	-1.16461	0.119492	0.83149
ptr-5	35.2487	-0.875893	0.755598	-1.15921	0.121218	0.83149
W04B5.2	72.1056	-0.7437	0.642811	-1.15695	0.121944	0.83149
pde-4	42.1068	-0.658778	0.569247	-1.15728	0.121837	0.83149
T10B5.8	236.043	-0.626	0.541138	-1.15682	0.121985	0.83149
hpo-32	83.7637	-0.6236	0.5385	-1.15803	0.121595	0.83149
tomm-20	712.894	-0.40329	0.346885	-1.1626	0.120131	0.83149
T06A10.3	627.8	-0.358189	0.3092	-1.15844	0.121464	0.83149
D2023.4	242.614	-0.346008	0.297315	-1.16378	0.119757	0.83149
rsp-1	8612.61	-0.309268	0.266957	-1.15849	0.121447	0.83149
swsn-6	5462.36	0.266377	0.229011	1.16316	0.119953	0.83149
Y4C6B.1	1811.68	0.272005	0.235235	1.15631	0.122149	0.83149
eya-1	1828.32	0.282597	0.244182	1.15732	0.121823	0.83149
F36D3.1	1395.77	0.297794	0.257575	1.15615	0.122202	0.83149
F48C1.6	196.618	0.318677	0.274288	1.16184	0.120376	0.83149
C45G7.4	633.437	0.338837	0.291959	1.16056	0.120782	0.83149
drh-3	1634.67	0.46051	0.39663	1.16106	0.120625	0.83149
T08H10.1	58.0879	0.603587	0.519961	1.16083	0.120696	0.83149
ZK370.4	508.797	0.663588	0.57126	1.16162	0.120444	0.83149
ZK355.2	65.2945	0.691474	0.5973	1.15767	0.121713	0.83149
F44E2.9	241.646	0.744082	0.638422	1.1655	0.11921	0.83149
F01G4.4	375.974	0.811675	0.697512	1.16367	0.119791	0.83149
F23C8.14	28.089	0.888547	0.763878	1.16321	0.119939	0.83149
T27A8.2	42.7179	1.06053	0.912967	1.16163	0.120442	0.83149
B0334.6	10.7033	1.07326	0.926628	1.15824	0.121529	0.83149
F30A10.15	13.7368	1.17041	1.00921	1.15973	0.121049	0.83149
K08C7.7	12.306	1.37304	1.1872	1.15654	0.122075	0.83149
osm-10	7.90339	1.38624	1.1951	1.15993	0.120984	0.83149
K03A1.4	4.66165	1.5376	1.32862	1.15729	0.121834	0.83149
W06A7.4	6.27885	1.61817	1.39645	1.15878	0.121355	0.83149
Y42H9AR.2	4.66665	1.84238	1.59132	1.15777	0.121678	0.83149
col-172	4.66033	1.86296	1.60723	1.15911	0.121247	0.83149
rpl-26	1986.86	-0.342094	0.295992	-1.15575	0.12233	0.831887
T24B8.2	1731.42	-0.282093	0.244161	-1.15536	0.122459	0.832287
lin-44	10.2969	-1.53477	1.32871	-1.15508	0.122548	0.832327
C25G4.2	350.356	-0.387055	0.335139	-1.15491	0.122604	0.832327
ceh-88	105.487	-0.700113	0.606682	-1.154	0.122896	0.832422
calu-1	4096.82	-0.527455	0.456815	-1.15463	0.122692	0.832422
Y56A3A.28	573.485	-0.301566	0.261237	-1.15438	0.122775	0.832422
sre-49	3.74618	2.80013	2.42633	1.15406	0.122879	0.832422
slc-17.8	3.32542	-2.19838	1.9061	-1.15334	0.123113	0.832995
R144.6	173.492	0.543744	0.471462	1.15332	0.12312	0.832995
daao-1	7.54034	-1.67335	1.45163	-1.15274	0.123306	0.833782
C40A11.8	2.84058	-2.68755	2.333	-1.15197	0.123557	0.834537
F09E5.8	508.875	-0.39006	0.338571	-1.15208	0.123523	0.834537
T17A3.12	27.2568	1.40198	1.21737	1.15165	0.123663	0.834779
Y37E3.8	3993.53	-0.355385	0.308721	-1.15115	0.123824	0.834922
Y71H2AM.15	264.479	0.378745	0.328958	1.15135	0.123761	0.834922
Y57A10A.23	1560.96	-0.430285	0.374107	-1.15016	0.124147	0.83663
R04B3.3	4.85602	-1.79984	1.56592	-1.14938	0.124403	0.83788
R151.1	12.6751	-1.07012	0.931352	-1.14899	0.124532	0.837938
dsl-7	8.23003	1.51102	1.31515	1.14893	0.124552	0.837938
tag-297	58.0216	-0.638295	0.555681	-1.14867	0.124637	0.838038
T01B4.3	69.3042	-0.700267	0.610264	-1.14748	0.125027	0.838388
rpl-35	3110.31	-0.422342	0.36784	-1.14817	0.124801	0.838388
fbxc-18	1204.47	0.29207	0.254491	1.14767	0.124967	0.838388
inx-11	61.6758	0.679564	0.592241	1.14744	0.125039	0.838388
C09B8.3	5.26584	1.85461	1.61619	1.14752	0.125014	0.838388
C06A5.8	81.4429	1.40885	1.2281	1.14718	0.125128	0.838512
C01G6.2	17.0478	-1.15766	1.01007	-1.14612	0.125475	0.840366
C16C10.9	6.72788	-1.46767	1.28184	-1.14497	0.125856	0.840435
lin-28	1486.88	-0.425866	0.371742	-1.1456	0.125648	0.840435
eat-17	770.419	0.357454	0.312028	1.14558	0.125653	0.840435
lin-65	4059.05	0.486071	0.424415	1.14527	0.125755	0.840435
grl-11	6.56783	1.66179	1.45156	1.14483	0.125902	0.840435
cri-1	2.86535	2.07736	1.81458	1.14481	0.125907	0.840435
nhr-284	6.23182	-1.3384	1.17017	-1.14376	0.126254	0.840477
cdh-9	36.3824	-1.1987	1.04896	-1.14275	0.12659	0.840477
cpr-6	177.678	-0.521086	0.456193	-1.14225	0.126757	0.840477
rps-14	3263.91	-0.390386	0.341144	-1.14434	0.126063	0.840477
F26A1.14	235.526	-0.371222	0.324954	-1.14238	0.126713	0.840477
cey-1	5583.31	-0.288036	0.251913	-1.14339	0.126378	0.840477
atg-7	2881.43	0.318333	0.278396	1.14345	0.126357	0.840477
vha-13	2729.76	0.32649	0.285602	1.14316	0.126454	0.840477
T10F2.2	226.443	0.406651	0.355887	1.14264	0.126628	0.840477
smu-1	1214.38	0.411119	0.359815	1.14258	0.126647	0.840477
C18A3.9	61.5552	0.730948	0.639266	1.14342	0.126369	0.840477
fbxa-220	2.36653	2.34264	2.04692	1.14447	0.126021	0.840477
F28C6.5	15.8946	-1.10159	0.964817	-1.14176	0.126919	0.841085
galt-1	7.38912	-1.55488	1.36321	-1.14061	0.127304	0.842122
T22H9.1	771.4	-0.497623	0.436513	-1.14	0.127508	0.842122
ddr-2	329.024	-0.458008	0.40145	-1.14088	0.127212	0.842122
fbxc-52	1493.04	0.323929	0.284174	1.1399	0.127541	0.842122
F53F10.2	467.716	0.783687	0.687406	1.14006	0.127485	0.842122
ctns-1	78.9499	1.03451	0.906838	1.14079	0.127245	0.842122
bath-47	3.08353	2.03629	1.78651	1.13981	0.127569	0.842122
cdc-25.4	1.95682	-2.44465	2.14566	-1.13934	0.127726	0.842546
C56C10.7	974.408	0.253251	0.222305	1.1392	0.127774	0.842546
Y48D7A.1	6.00807	-1.69775	1.49113	-1.13857	0.127985	0.843475
M01G12.14	2.0092	-3.54361	3.11441	-1.13781	0.128239	0.843662
ZK185.5	12.5299	-1.23929	1.08922	-1.13777	0.128252	0.843662
nstp-1	51.7049	0.789187	0.693573	1.13786	0.128224	0.843662
pqn-8	3.05414	2.13427	1.87605	1.13764	0.128296	0.843662
ceh-23	6.87441	-2.32385	2.0446	-1.13658	0.128653	0.844959
T20H12.1	2.45549	-2.1361	1.87992	-1.13627	0.128756	0.844959
ugt-7	11.3483	1.19743	1.05387	1.13621	0.128776	0.844959
F59E11.5	2.44986	2.47797	2.18017	1.13659	0.128648	0.844959
F02C12.1	15.1764	-1.14129	1.00505	-1.13556	0.128997	0.845482
rnf-113	883.725	-0.412347	0.363057	-1.13576	0.128928	0.845482
T10B11.8	365.739	0.387779	0.341737	1.13473	0.129276	0.845919
F16G10.8	47.1771	1.2281	1.08227	1.13474	0.129271	0.845919
F48E3.2	7.60807	1.78875	1.57598	1.135	0.129184	0.845919
Y58A7A.2	59.5407	0.683005	0.602099	1.13437	0.129396	0.846244
exoc-8	654.188	0.479842	0.423144	1.13399	0.129525	0.846623
strd-1	163.74	0.387135	0.341504	1.13362	0.129652	0.846723
pqn-13	23.4484	0.849256	0.749215	1.13353	0.129682	0.846723
rrc-1	119.155	-0.50794	0.44823	-1.13321	0.129789	0.846961
F46C3.6	2.28431	-2.83722	2.50539	-1.13245	0.130049	0.847074
B0238.15	12.8568	-1.45861	1.28821	-1.13228	0.130106	0.847074
Y48A5A.1	330.46	0.281775	0.248892	1.13212	0.130161	0.847074
henn-1	610.345	0.417204	0.368476	1.13224	0.130118	0.847074
nhr-152	118.825	0.643525	0.568406	1.13216	0.130147	0.847074
T28A8.2	1.50727	-3.04064	2.72079	-1.11756	0.135173	0.847767
C45B11.9	2.22208	-2.81419	2.49102	-1.12973	0.130972	0.847767
lgc-4	2.05806	-2.77346	2.46913	-1.12325	0.133195	0.847767
pqn-37	4.1611	-2.73306	2.44486	-1.11788	0.135063	0.847767
col-50	3.77576	-2.6397	2.3349	-1.13054	0.130695	0.847767
F38B7.10	5.05337	-2.39613	2.13233	-1.12372	0.133036	0.847767
Y49E10.10	2.91719	-2.23345	1.98282	-1.1264	0.132111	0.847767
T12A7.6	4.91517	-2.2268	1.98092	-1.12412	0.132895	0.847767
F54H12.8	3.29713	-1.87673	1.67462	-1.12069	0.134083	0.847767
Y55B1BR.6	4.714	-1.7559	1.56583	-1.12139	0.133842	0.847767
C16B8.3	6.09978	-1.73306	1.53887	-1.12619	0.132184	0.847767
pqn-10	19.9439	-1.7241	1.53576	-1.12264	0.133408	0.847767
dml-1	15.1189	-1.65074	1.46863	-1.124	0.132939	0.847767
Y17D7C.6	9.46519	-1.54197	1.37711	-1.11971	0.134424	0.847767
ztf-14	8.81274	-1.51223	1.34467	-1.1246	0.132729	0.847767
col-97	7.54174	-1.48614	1.32912	-1.11814	0.134972	0.847767
ceh-90	6.19059	-1.45255	1.2965	-1.12036	0.134197	0.847767
C49C3.10	14.0216	-1.29076	1.14343	-1.12885	0.131273	0.847767
H31G24.3	19.4284	-1.14074	1.02044	-1.11788	0.13506	0.847767
T23F2.2	63.2639	-1.06897	0.945206	-1.13094	0.130562	0.847767
K07E8.6	17.7655	-1.06102	0.945439	-1.12225	0.133542	0.847767
nhr-6	12.1283	-1.04409	0.924175	-1.12975	0.130964	0.847767
nhr-107	20.9352	-0.927535	0.826179	-1.12268	0.133393	0.847767
nhr-18	26.7756	-0.908933	0.813677	-1.11707	0.135345	0.847767
EEED8.14	86.7329	-0.882186	0.785603	-1.12294	0.133303	0.847767
C46C11.2	26.7543	-0.845888	0.751801	-1.12515	0.132541	0.847767
nrf-6	49.0449	-0.842037	0.746958	-1.12729	0.131807	0.847767
K08C7.4	34.1409	-0.805711	0.712758	-1.13041	0.13074	0.847767
Y97E10AL.2	400.339	-0.779514	0.693103	-1.12467	0.132706	0.847767
hpo-16	187.154	-0.66167	0.588892	-1.12358	0.133081	0.847767
rig-6	104.353	-0.644259	0.57684	-1.11688	0.135412	0.847767
ddr-1	81.4393	-0.578337	0.517401	-1.11777	0.135099	0.847767
Y54F10AL.1	291.569	-0.555198	0.496398	-1.11845	0.134861	0.847767
Y105E8B.6	198.66	-0.504949	0.44948	-1.12341	0.133143	0.847767
B0205.12	117.972	-0.47781	0.426824	-1.11945	0.134513	0.847767
W02D7.6	360.011	-0.408685	0.365523	-1.11808	0.13499	0.847767
elc-1	2392.87	-0.40209	0.357895	-1.12349	0.133115	0.847767
ubh-2	401.431	-0.397522	0.354499	-1.12136	0.13385	0.847767
Y53F4B.3	1076.83	-0.380099	0.339479	-1.11965	0.134443	0.847767
rpl-22	2262.38	-0.359298	0.321147	-1.1188	0.134742	0.847767
unc-76	829.311	0.25953	0.231639	1.1204	0.134182	0.847767
unc-61	2976.26	0.287845	0.257446	1.11808	0.134992	0.847767
hpo-31	528.973	0.320628	0.286432	1.11939	0.134536	0.847767
F22E5.20	250.554	0.324967	0.289022	1.12437	0.132811	0.847767
ung-1	1563.21	0.336614	0.300576	1.1199	0.134359	0.847767
R04F11.5	353.086	0.343273	0.304758	1.12638	0.132119	0.847767
npp-4	5123.51	0.355511	0.314884	1.12902	0.131213	0.847767
T23H2.3	1589.14	0.371973	0.329707	1.12819	0.131497	0.847767
prx-12	496.316	0.433266	0.38753	1.11802	0.135013	0.847767
sur-2	1634.02	0.441928	0.394804	1.11936	0.134545	0.847767
cct-1	3820.49	0.447175	0.399361	1.11973	0.134418	0.847767
cct-2	2643.82	0.448952	0.401469	1.11827	0.134924	0.847767
bath-10	974.043	0.45323	0.40529	1.11829	0.134919	0.847767
F19F10.11	500.157	0.45687	0.408653	1.11799	0.135023	0.847767
F40F8.3	82.7198	0.480699	0.42757	1.12426	0.132849	0.847767
pash-1	765.398	0.499867	0.446916	1.11848	0.134851	0.847767
M01H9.4	111.369	0.529447	0.471729	1.12235	0.133506	0.847767
C46C11.4	115.994	0.539581	0.483156	1.11679	0.135444	0.847767
nhr-66	388.225	0.540293	0.479512	1.12676	0.131989	0.847767
mpz-1	73.9372	0.57918	0.514216	1.12633	0.132134	0.847767
C32B5.15	236.268	0.583016	0.519829	1.12156	0.133783	0.847767
dyf-1	44.2913	0.603607	0.538571	1.12076	0.13406	0.847767
Y110A7A.7	111.917	0.74724	0.663396	1.12639	0.132117	0.847767
stdh-1	100.966	0.776811	0.689307	1.12695	0.131924	0.847767
fbxb-70	76.9595	0.789995	0.703107	1.12358	0.133084	0.847767
F53H4.4	18.5848	0.830644	0.739108	1.12385	0.132991	0.847767
cyp-25A3	52.9829	0.904523	0.80963	1.11721	0.135297	0.847767
W10C4.1	8.3911	1.33614	1.19138	1.12151	0.1338	0.847767
str-7	7.40382	1.51348	1.3381	1.13107	0.130517	0.847767
srz-60	7.8697	1.60136	1.4229	1.12542	0.132448	0.847767
T07F10.1	9.36145	1.60604	1.43708	1.11757	0.13517	0.847767
tat-2	9.07613	1.62155	1.44998	1.11833	0.134906	0.847767
rpa-4	5.67262	1.98958	1.76476	1.12739	0.131771	0.847767
srd-32	6.55632	-1.81112	1.62232	-1.11638	0.135587	0.848217
lpr-1	27.6277	-0.986559	0.883959	-1.11607	0.135695	0.848448
set-33	3.01452	-2.52301	2.26402	-1.11439	0.136283	0.849018
CD4.1	2.51291	-2.24078	2.01055	-1.11451	0.136241	0.849018
cyp-35A2	5.71113	-2.04766	1.83619	-1.11517	0.136012	0.849018
Y60A3A.9	494.021	-0.693553	0.622229	-1.11463	0.136202	0.849018
rps-18	4296.01	-0.352238	0.316007	-1.11465	0.136192	0.849018
fdps-1	430.819	0.322729	0.289305	1.11553	0.135883	0.849018
fbxc-20	122.593	0.384614	0.344851	1.11531	0.135963	0.849018
nos-1	102.661	-0.955992	0.858681	-1.11333	0.136659	0.849479
R03H10.6	22.4989	-0.710803	0.638537	-1.11317	0.136712	0.849479
F58G1.2	175.262	-0.493102	0.442869	-1.11343	0.136624	0.849479
F58H1.5	345.793	-0.37495	0.336731	-1.1135	0.136598	0.849479
cnt-1	328.202	0.503156	0.451768	1.11375	0.13651	0.849479
C17B7.5	1.74814	-2.846	2.56639	-1.10895	0.138208	0.851856
oac-53	1.6575	-2.71558	2.44869	-1.10899	0.138193	0.851856
C56G7.2	2.35214	-2.41425	2.1762	-1.10939	0.138053	0.851856
T20B6.3	3.1155	-2.17107	1.95522	-1.1104	0.137695	0.851856
cdh-10	13.6558	-1.24816	1.12602	-1.10847	0.138378	0.851856
nhr-7	18.797	-0.922921	0.831647	-1.10975	0.137923	0.851856
ndg-4	55.5488	-0.916831	0.82467	-1.11176	0.137213	0.851856
C37A2.6	31.1523	-0.668827	0.602448	-1.11018	0.137771	0.851856
gly-5	180.487	-0.595797	0.5363	-1.11094	0.137502	0.851856
F49H12.5	341.291	-0.464065	0.418635	-1.10852	0.13836	0.851856
Y105E8A.20	284.056	-0.459009	0.413144	-1.11101	0.137475	0.851856
scm-1	1127.73	0.388251	0.349803	1.10991	0.137866	0.851856
ztf-30	128.537	0.470124	0.4231	1.11114	0.137431	0.851856
duo-3	754.273	0.521894	0.470623	1.10894	0.13821	0.851856
T09B9.1	160.873	0.657443	0.593025	1.10863	0.138322	0.851856
Y53F4B.12	12.6428	1.05145	0.947502	1.1097	0.13794	0.851856
C05E4.15	14.0044	1.07825	0.969983	1.11162	0.137261	0.851856
F44A6.5	12.5407	1.13241	1.02037	1.1098	0.137905	0.851856
bus-12	27.5825	0.968222	0.874033	1.10776	0.13863	0.85297
F40G9.18	232.277	0.55078	0.497505	1.10708	0.138872	0.85402
mppb-1	258.381	-0.35918	0.324675	-1.10628	0.139161	0.855357
copd-1	2221.37	0.226892	0.205212	1.10565	0.139386	0.855419
set-3	833.306	0.265934	0.240511	1.10571	0.139365	0.855419
ZK673.4	198.951	0.526064	0.475775	1.1057	0.139367	0.855419
mam-1	13.7856	1.15285	1.04294	1.10539	0.139478	0.855546
fbxb-45	501.252	0.632668	0.572844	1.10443	0.13982	0.856385
Y71G12B.17	18.762	0.998255	0.903632	1.10471	0.13972	0.856385
F46G11.4	6.41393	1.43513	1.29946	1.10441	0.13983	0.856385
parn-1	119.75	-1.02993	0.933181	-1.10368	0.140091	0.8571
Y47G6A.18	1161.51	0.280924	0.254776	1.10263	0.140468	0.8571
cpsf-1	2534.1	0.346636	0.314184	1.10329	0.140231	0.8571
H24K24.2	184.915	0.390208	0.353738	1.1031	0.140299	0.8571
hpk-1	2028.61	0.409967	0.371732	1.10286	0.140386	0.8571
F53C11.5	968.951	0.431962	0.391807	1.10249	0.14052	0.8571
ZK1098.3	531.464	0.44403	0.402334	1.10364	0.140107	0.8571
elo-2	50.6451	0.626101	0.567633	1.103	0.140334	0.8571
ZC116.3	54.2341	-0.921241	0.835924	-1.10206	0.140672	0.857335
K07H8.10	5876.74	-0.600404	0.544841	-1.10198	0.140702	0.857335
Y2H9A.6	2.39306	-2.89287	2.62744	-1.10102	0.141048	0.857769
Y57G11C.5	5.41519	-2.0087	1.83412	-1.09519	0.143166	0.857769
K10C9.7	13.5355	-1.94983	1.7817	-1.09436	0.143468	0.857769
lact-8	11.6978	-1.67353	1.52817	-1.09512	0.143192	0.857769
csp-2	6.77617	-1.60501	1.4683	-1.09311	0.143927	0.857769
ztf-2	6.40215	-1.40654	1.28489	-1.09468	0.143352	0.857769
Y48A6B.7	14.621	-1.06864	0.971432	-1.10007	0.141394	0.857769
Y49E10.4	171.174	-0.976583	0.887348	-1.10056	0.141213	0.857769
lars-2	122.182	-0.924986	0.845197	-1.0944	0.143453	0.857769
C56G2.3	91.13	-0.604325	0.549652	-1.09947	0.14161	0.857769
T19A5.1	679.768	-0.586068	0.532478	-1.10064	0.141185	0.857769
C33G3.4	567.878	-0.578607	0.527755	-1.09635	0.142741	0.857769
R04B3.2	178.462	-0.564705	0.513919	-1.09882	0.141844	0.857769
K02A6.3	66.1521	-0.536094	0.490643	-1.09264	0.144101	0.857769
C54E4.5	55.2461	-0.535982	0.489498	-1.09496	0.143248	0.857769
F10G7.9	749.634	-0.522926	0.47832	-1.09326	0.143873	0.857769
nucb-1	284.35	-0.483998	0.442754	-1.09315	0.143911	0.857769
rpl-14	3652.56	-0.339699	0.311045	-1.09212	0.144289	0.857769
ztf-25	667.816	-0.321509	0.292539	-1.09903	0.141769	0.857769
madf-2	349.709	-0.294802	0.269359	-1.09446	0.143433	0.857769
ZK353.9	732.689	-0.281415	0.255568	-1.10114	0.141007	0.857769
mms-19	761.692	0.299495	0.272925	1.09735	0.142378	0.857769
attf-4	1311.06	0.302018	0.275185	1.09751	0.142321	0.857769
mcm-2	17359.9	0.303897	0.278129	1.09265	0.144097	0.857769
paqr-2	860.974	0.305813	0.278645	1.0975	0.142324	0.857769
B0361.6	598.155	0.31888	0.290305	1.09843	0.141985	0.857769
ZK632.10	1056.87	0.338997	0.310127	1.09309	0.143934	0.857769
mau-2	721.806	0.339867	0.309925	1.09661	0.142647	0.857769
efa-6	2095.78	0.371082	0.338184	1.09728	0.142404	0.857769
B0310.2	795.639	0.37137	0.340021	1.0922	0.144261	0.857769
E01B7.2	387.931	0.37658	0.343507	1.09628	0.142768	0.857769
F55C12.1	221.428	0.381323	0.348049	1.0956	0.143016	0.857769
F26F2.7	340.336	0.403449	0.367227	1.09863	0.141912	0.857769
sdz-4	981.17	0.410258	0.372895	1.1002	0.141346	0.857769
ZK686.1	361.443	0.415565	0.380229	1.09293	0.143991	0.857769
dct-13	608.533	0.447892	0.408963	1.09519	0.143166	0.857769
lim-8	409.017	0.45246	0.41124	1.10023	0.141333	0.857769
[truncated: 9,956 more rows]
