# Supplementary material for: Recruitment of mRNAs to P granules by condensation with intrinsically-disordered proteins
Source: eLife. 2020 Jan 24;9:e52896. doi: 10.7554/eLife.52896 (PMC7007223; doi:10.7554/eLife.52896)
Supplement: Supplementary file 5. [file elife-52896-supp5.xlsx]

## Sheet: Sheet1
Library name	Accession number	Strain ID	Genotype	Description	Used in analyses for Figure # in this study
Slee102	GSM4148065	JH3503	MEG-3 GFP	iCLIP	Figure 1,Figure 2-S1,S2
Slee110	GSM4148066	JH3503	MEG-3 GFP	iCLIP	Figure 1,Figure 2-S1,S2
Slee106	GSM4148067	JH3269	PGL-1 GFP	iCLIP	Figure 1
Slee109	GSM4148068	JH3269	PGL-1 GFP	iCLIP	Figure 1
Tu-0122-169	GSM4148069	JH1904	GFP	iCLIP	Figure 1,Figure 2-S1
Tu-0122-170	GSM4148070	JH1904	GFP	iCLIP	Figure 1,Figure 2-S1
Slee113	GSM4148083	N2	N2	mRNAseq for Slee111	Figure 2, Figure 2-S2
Slee125	GSM4148086	JH3475	meg3meg4	mRNAseq for Slee123	Figure 2, Figure 2-S2
Slee138	GSM4148084	N2	N2	mRNAseq for Slee132	Figure 2, Figure 2-S2
Slee139	GSM4148087	JH3475	meg3meg4	mRNAseq for Slee133	Figure 2, Figure 2-S2
Slee141	GSM4148088	JH3475	meg3meg4	mRNAseq for Slee135	Figure 2, Figure 2-S2
Slee142	GSM4148085	N2	N2	mRNAseq for Slee136	Figure 2, Figure 2-S2
Slee111	GSM4148077	N2	N2	Ribosome profiling	Figure 2, Figure 2-S2
Slee123	GSM4148080	JH3475	meg3meg4	Ribosome profiling	Figure 2, Figure 2-S2
Slee132	GSM4148078	N2	N2	Ribosome profiling	Figure 2, Figure 2-S2
Slee133	GSM4148081	JH3475	meg3meg4	Ribosome profiling	Figure 2, Figure 2-S2
Slee135	GSM4148082	JH3475	meg3meg4	Ribosome profiling	Figure 2, Figure 2-S2
Slee136	GSM4148079	N2	N2	Ribosome profiling	Figure 2, Figure 2-S2
Tu-emb-N2-1	GSM4148071	N2	N2	mRNAseq	Figure 3
Tu-emb-N2-2	GSM4148072	N2	N2	mRNAseq	Figure 3
Tu-emb-N2-3	GSM4148073	N2	N2	mRNAseq	Figure 3
Tu-emb-m34-1	GSM4148074	JH3475	meg-3meg-4	mRNAseq	Figure 3
Tu-emb-m34-2	GSM4148075	JH3475	meg-3meg-4	mRNAseq	Figure 3
Tu-emb-m34-3	GSM4148076	JH3475	meg-3meg-4	mRNAseq	Figure 3
