# Supplementary material for: Recruitment of mRNAs to P granules by condensation with intrinsically-disordered proteins
Source: eLife. 2020 Jan 24;9:e52896. doi: 10.7554/eLife.52896 (PMC7007223; doi:10.7554/eLife.52896)
Supplement: Supplementary file 6. [file elife-52896-supp6.csv]

mapped read counts for iCLIP experiments ( 2x MEG-3, 2x PGL-1 and 2x GFP iCLIP)
ID	Gene_name	Gene_ID	1st_MEG-3	2nd_MEG-3	1st_PGL-1	2nd_PGL-1	1st_GFP	2nd_GFP
WBGene00000001	aap-1	Y110A7A.10	2	14	99	5	12	0
WBGene00000002	aat-1	F27C8.1	0	1	0	0	0	0
WBGene00000003	aat-2	F07C3.7	0	1	0	2	0	0
WBGene00000004	aat-3	F52H2.2	0	4	0	7	0	0
WBGene00000005	aat-4	T13A10.10	0	0	0	0	0	0
WBGene00000006	aat-5	C55C2.5	0	0	0	0	0	0
WBGene00000007	aat-6	T11F9.4	0	0	0	0	0	0
WBGene00000008	aat-7	F54D12.3	0	0	0	0	0	0
WBGene00000009	aat-8	F28F9.4	0	0	0	0	0	0
WBGene00000010	aat-9	Y53H1C.1	56	8	0	7	0	0
WBGene00000012	abf-1	C50F2.9	0	0	0	0	0	0
WBGene00000013	abf-2	C50F2.10	0	0	0	0	0	0
WBGene00000014	abf-3	F54B8.5	0	0	0	0	0	0
WBGene00000015	abf-4	Y38H6C.22	0	0	0	0	0	0
WBGene00000016	abf-5	T22H6.5	0	0	0	0	0	0
WBGene00000017	abf-6	T22H6.7	0	0	0	0	0	0
WBGene00000018	abl-1	M79.1	0	2	0	7	1	0
WBGene00000019	abt-1	C24F3.5	0	0	0	0	0	0
WBGene00000020	abt-2	F12B6.1	0	1	0	4	0	0
WBGene00000021	abt-3	F55G11.9	0	0	0	0	0	0
WBGene00000022	abt-4	Y39D8C.1	0	0	0	0	0	0
WBGene00000023	abt-5	Y53C10A.9	0	0	0	0	0	0
WBGene00000024	abu-1	AC3.3	0	0	0	0	0	0
WBGene00000025	abu-2	F19G12.7	0	0	0	0	0	0
WBGene00000026	abu-3	F31A3.1	0	0	0	0	0	0
WBGene00000027	abu-4	Y5H2A.3	0	0	0	0	0	0
WBGene00000028	abu-5	Y105C5A.4	0	0	0	0	0	0
WBGene00000029	abu-6	C03A7.7	0	0	0	0	0	0
WBGene00000030	abu-7	C03A7.8	0	0	0	0	0	0
WBGene00000031	abu-8	C03A7.14	0	0	0	0	0	0
WBGene00000032	abu-9	R09F10.2	0	0	0	0	0	0
WBGene00000033	abu-10	F35A5.3	0	0	0	0	0	0
WBGene00000034	abu-11	T01D1.6	0	0	0	0	0	0
WBGene00000035	ace-1	W09B12.1	0	0	0	0	0	0
WBGene00000036	ace-2	Y44E3A.2	0	0	0	1	0	0
WBGene00000037	ace-3	Y48B6A.8	0	0	0	0	0	0
WBGene00000038	ace-4	Y48B6A.7	0	0	0	0	0	0
WBGene00000039	acn-1	C42D8.5	0	2	0	4	0	1
WBGene00000040	aco-1	ZK455.1	0	18	0	9	2	0
WBGene00000041	aco-2	F54H12.1	108	187	0	27	5	14
WBGene00000042	acr-2	K11G12.2	0	0	0	0	0	0
WBGene00000043	acr-3	K11G12.7	0	0	0	0	0	0
WBGene00000044	acr-5	K03F8.2	0	0	0	0	0	0
WBGene00000045	acr-6	ZK973.5	0	0	0	0	0	0
WBGene00000046	acr-7	T09A5.3	0	0	0	0	0	0
WBGene00000047	acr-8	ZC504.2	0	0	0	1	0	0
WBGene00000048	acr-9	C40C9.2	0	0	0	0	0	0
WBGene00000049	acr-10	R02E12.8	0	0	0	0	0	0
WBGene00000050	acr-11	D2092.3	0	0	0	0	0	0
WBGene00000051	acr-12	R01E6.4	0	0	0	2	0	0
WBGene00000053	acr-14	T05C12.2	0	0	0	2	0	0
WBGene00000054	acr-15	F25G6.4	0	0	0	0	0	0
WBGene00000055	acr-16	F25G6.3	0	1	0	0	0	0
WBGene00000056	acr-17	F53E10.2	0	0	0	0	0	0
WBGene00000057	acr-18	F28F8.1	0	0	0	0	0	0
WBGene00000058	acr-19	C31H5.3	0	0	0	0	0	0
WBGene00000059	acr-20	R06A4.10	0	0	0	0	0	0
WBGene00000060	acr-21	F27B3.2	0	0	0	0	0	0
WBGene00000061	lgc-11	F48E3.7	0	0	0	0	0	0
WBGene00000062	acr-23	F59B1.9	0	0	0	0	0	0
WBGene00000063	act-1	T04C12.6	9	5	0	12	6	1
WBGene00000064	act-2	T04C12.5	296	299	1	55	8	3
WBGene00000065	act-3	T04C12.4	109	42	1	21	9	2
WBGene00000066	act-4	M03F4.2	98	7	1	71	0	18
WBGene00000067	act-5	T25C8.2	0	1	0	4	1	0
WBGene00000068	acy-1	F17C8.1	0	1	0	0	0	0
WBGene00000069	acy-2	C10F3.3	0	0	0	0	0	0
WBGene00000070	acy-3	C44F1.5	0	1	0	0	0	0
WBGene00000071	acy-4	T01C2.1	0	1	0	0	0	0
WBGene00000072	add-1	F39C12.2	0	0	0	0	0	20
WBGene00000073	add-2	F57F5.4	2	1	0	3	0	0
WBGene00000074	adm-2	C04A11.4	1	3	0	2	9	0
WBGene00000075	adm-4	ZK154.7	0	0	0	2	0	0
WBGene00000079	adr-1	H15N14.1	0	11	0	5	0	0
WBGene00000080	adr-2	T20H4.4	0	22	0	1	1	0
WBGene00000081	ads-1	Y50D7A.7	0	0	0	2	0	0
WBGene00000082	adt-1	C02B4.1	0	2	0	0	0	0
WBGene00000083	adt-2	F08C6.1	0	0	0	1	0	0
WBGene00000084	aex-1	D2030.10	0	0	0	0	0	0
WBGene00000085	aex-2	T14B1.2	0	0	0	0	0	0
WBGene00000086	aex-3	C02H7.3	0	3	0	1	0	0
WBGene00000088	aex-5	F32A7.6	0	0	0	0	0	0
WBGene00000089	aex-6	Y87G2A.4	0	0	0	0	0	0
WBGene00000090	age-1	B0334.8	0	69	0	8	10	0
WBGene00000092	ags-3	F32A6.4	11	4	0	29	1	20
WBGene00000093	agt-1	Y62E10A.5	0	20	0	0	0	0
WBGene00000094	agt-2	F09E5.13	0	4	0	1	1	0
WBGene00000095	aha-1	C25A1.11	0	16	0	7	0	0
WBGene00000096	ahr-1	C41G7.5	0	0	0	1	0	0
WBGene00000097	aip-1	F58E10.4	2	1	0	0	4	0
WBGene00000098	air-1	K07C11.2	117	227	0	16	32	2
WBGene00000099	air-2	B0207.4	0	23	0	7	0	0
WBGene00000100	ajm-1	C25A11.4	85	1	0	25	9	3
WBGene00000101	aka-1	D1022.7	74	299	3	43	4	2
WBGene00000102	akt-1	C12D8.10	46	55	63	30	21	2
WBGene00000103	akt-2	F28H6.1	0	4	0	3	0	8
WBGene00000105	alg-1	F48F7.1	3	77	0	20	3	12
WBGene00000106	alg-2	T07D3.7	9	65	0	13	7	0
WBGene00000107	alh-1	F54D8.3	94	89	0	6	2	0
WBGene00000108	alh-2	K04F1.15	0	0	0	0	0	0
WBGene00000109	alh-3	F36H1.6	0	32	0	7	0	0
WBGene00000110	alh-4	T05H4.13	0	12	0	13	7	0
WBGene00000111	alh-5	T08B1.3	0	0	0	0	0	0
WBGene00000112	alh-6	F56D12.1	0	47	0	10	2	0
WBGene00000113	alh-7	F45H10.1	0	0	0	6	0	0
WBGene00000114	alh-8	F13D12.4	1	104	15	21	2	0
WBGene00000115	alh-9	F01F1.6	71	1	0	13	0	0
WBGene00000116	alh-10	C54D1.4	0	0	0	2	0	0
WBGene00000117	alh-11	F42G9.5	0	2	0	3	0	0
WBGene00000118	alh-12	Y69F12A.2	0	0	0	0	0	0
WBGene00000120	aly-1	C01F6.5	0	9	0	2	0	0
WBGene00000121	aly-2	F23B2.6	0	1	0	5	1	0
WBGene00000122	aly-3	M18.7	103	79	0	31	11	0
WBGene00000123	ama-1	F36A4.7	47	34	10	66	6	6
WBGene00000133	amt-1	C05E11.4	0	0	0	0	0	0
WBGene00000134	amt-2	F49E11.3	0	0	0	0	0	0
WBGene00000135	amt-3	M195.3	0	0	0	0	0	0
WBGene00000136	amt-4	C05E11.5	0	0	0	0	0	0
WBGene00000137	amx-1	R13G10.2	0	4	0	2	1	0
WBGene00000138	amx-2	B0019.1	0	0	0	2	0	0
WBGene00000139	amx-3	F25C8.2	0	0	0	3	0	0
WBGene00000140	anc-1	ZK973.6	37	5	0	49	0	0
WBGene00000142	aos-1	C08B6.9	6	26	0	10	3	0
WBGene00000143	apc-2	K06H7.6	0	57	0	6	0	0
WBGene00000144	apc-10	F15H10.3	0	18	0	5	0	0
WBGene00000145	apc-11	F35G12.9	0	0	0	3	0	0
WBGene00000146	ape-1	F46F3.4	115	59	38	18	2	0
WBGene00000147	aph-1	VF36H2L.1	0	10	0	16	10	0
WBGene00000148	aph-2	ZC434.6	0	21	0	11	1	2
WBGene00000149	apl-1	C42D8.8	0	9	0	36	0	28
WBGene00000150	apm-1	F55A12.7	0	0	0	3	0	0
WBGene00000151	apn-1	T05H10.2	0	18	0	1	2	0
WBGene00000155	app-1	W03G9.4	0	15	0	11	1	0
WBGene00000156	1-Apr	K04G2.8	2	75	0	26	0	0
WBGene00000157	aps-2	F02E8.3	0	2	0	9	0	0
WBGene00000158	apg-1	Y105E8A.9	21	67	3	14	12	1
WBGene00000159	aps-1	F29G9.3	0	9	0	4	0	0
WBGene00000160	apb-1	Y71H2B.10	119	38	0	46	5	0
WBGene00000161	apa-2	T20B5.1	0	17	0	18	5	3
WBGene00000162	apd-3	W09G10.4	0	21	0	19	5	0
WBGene00000163	apb-3	R11A5.1	0	47	0	12	1	7
WBGene00000164	apm-3	F53H8.1	0	0	0	0	1	0
WBGene00000165	aps-3	Y48G8AL.14	0	3	0	13	1	0
WBGene00000166	apt-9	W04G3.4	0	0	0	0	0	0
WBGene00000168	apx-1	K08D9.3	94	160	1	28	3	1
WBGene00000169	aqp-1	F32A5.5	0	0	0	0	0	0
WBGene00000170	aqp-2	C01G6.1	0	16	0	73	0	16
WBGene00000171	aqp-3	Y69E1A.7	0	0	0	0	0	0
WBGene00000172	aqp-4	F40F9.9	0	0	0	1	0	0
WBGene00000173	aqp-5	C35A5.1	0	0	0	0	0	2
WBGene00000174	aqp-6	C32C4.2	0	0	0	0	0	0
WBGene00000175	aqp-7	M02F4.8	0	0	0	0	0	0
WBGene00000176	aqp-8	K02G10.7	0	0	0	0	0	0
WBGene00000177	aqp-9	K07A1.16	0	0	0	0	0	0
WBGene00000178	aqp-10	ZK1321.3	0	4	0	2	5	3
WBGene00000179	aqp-11	ZK525.2	0	3	0	2	0	0
WBGene00000180	arc-1	ZK1320.6	0	0	0	0	1	0
WBGene00000181	ard-1	F01G4.2	0	33	3	1	0	0
WBGene00000182	arf-1.2	B0336.2	6	84	0	67	37	3
WBGene00000183	arf-3	F57H12.1	0	76	0	43	10	0
WBGene00000184	arf-6	Y116A8C.12	0	5	0	1	0	0
WBGene00000185	arg-1	F31A9.3	0	0	0	0	0	0
WBGene00000186	ark-1	C01C7.1	0	20	0	10	3	0
WBGene00000187	arl-1	F54C9.10	0	17	0	18	1	3
WBGene00000188	arl-3	F19H8.3	0	2	0	2	0	0
WBGene00000189	arl-5	ZK632.8	57	1	0	2	1	0
WBGene00000190	arf-1.1	F45E4.1	0	0	0	0	0	0
WBGene00000191	arl-7	F20D1.5	0	0	0	0	0	0
WBGene00000192	arl-8	Y57G11C.13	251	296	12	13	16	1
WBGene00000193	arl-6	C38D4.8	0	0	0	0	0	0
WBGene00000195	arr-1	F53H8.2	0	34	0	3	1	2
WBGene00000196	aars-1	W02B12.6	0	25	0	3	0	0
WBGene00000197	aars-2	F28H1.3	98	61	0	27	4	6
WBGene00000198	art-1	C15F1.6	57	13	0	15	9	0
WBGene00000199	arx-1	Y71F9AL.16	0	12	0	5	13	0
WBGene00000200	arx-2	K07C5.1	106	159	0	13	12	0
WBGene00000201	arx-3	Y79H2A.6	100	93	19	16	10	0
WBGene00000202	exos-4.2	Y6D11A.1	2	7	0	18	0	0
WBGene00000203	arx-5	Y37D8A.1	50	55	0	2	3	1
WBGene00000204	arx-6	C35D10.16	0	64	0	7	7	0
WBGene00000205	arx-7	M01B12.3	0	3	0	4	0	0
WBGene00000206	asb-1	F35G12.10	3	46	3	2	1	0
WBGene00000207	asb-2	F02E8.1	0	7	0	11	0	23
WBGene00000208	asc-1	Y53F4B.15	0	0	0	2	0	22
WBGene00000209	asg-1	K07A12.3	0	1	0	5	1	2
WBGene00000210	asg-2	C53B7.4	0	18	0	1	1	4
WBGene00000211	asm-1	B0252.2	0	0	0	2	0	0
WBGene00000212	asm-2	ZK455.4	0	0	0	0	0	0
WBGene00000213	asm-3	W03G1.7	0	0	0	0	0	0
WBGene00000214	asp-1	Y39B6A.20	0	0	0	6	0	0
WBGene00000215	asp-2	T18H9.2	0	0	0	0	0	0
WBGene00000216	asp-3	H22K11.1	0	0	0	0	0	0
WBGene00000217	asp-4	R12H7.2	0	1	0	6	0	0
WBGene00000218	asp-5	F21F8.3	0	0	0	0	0	0
WBGene00000219	asp-6	F21F8.7	0	0	0	2	0	3
WBGene00000220	atf-2	K08F8.2	0	3	0	2	0	0
WBGene00000221	atf-5	T04C10.4	0	0	0	2	0	0
WBGene00000222	atf-6	F45E6.2	0	5	0	3	0	0
WBGene00000223	atf-7	C07G2.2	118	447	0	55	26	1
WBGene00000224	atgp-1	F26D10.9	0	3	0	2	0	0
WBGene00000225	atgp-2	C38C6.2	12	28	0	9	4	0
WBGene00000226	atl-1	T06E4.3	1	9	0	23	2	0
WBGene00000227	atm-1	Y48G1BL.2	11	10	0	19	2	1
WBGene00000228	atn-1	W04D2.1	0	0	0	2	0	0
WBGene00000229	atp-2	C34E10.6	126	510	116	66	27	11
WBGene00000230	atp-3	F27C1.7	0	10	0	30	0	3
WBGene00000231	atx-2	D2045.1	229	186	1	108	7	2
WBGene00000232	avr-14	B0207.12	0	0	0	0	0	1
WBGene00000233	avr-15	R11G10.1	0	0	0	0	0	0
WBGene00000235	baf-1	B0464.7	1	24	45	11	2	0
WBGene00000236	bag-1	F57B10.11	0	15	0	1	0	0
WBGene00000237	bam-2	Y71F9AR.1	0	1	0	2	0	0
WBGene00000238	bar-1	C54D1.6	0	0	0	0	0	0
WBGene00000239	bas-1	C05D2.4	0	0	0	0	1	0
WBGene00000240	pah-1	K08F8.4	0	0	0	1	0	0
WBGene00000241	bbs-1	Y105E8A.5	0	0	0	0	0	0
WBGene00000242	bbs-2	F20D12.3	0	0	0	0	0	0
WBGene00000244	bbs-8	T25F10.5	0	0	0	1	0	3
WBGene00000245	bca-1	T13C5.5	0	5	0	2	0	0
WBGene00000246	bcc-1	M7.3	0	0	0	0	0	0
WBGene00000247	bec-1	T19E7.3	0	2	0	11	0	0
WBGene00000248	ben-1	C54C6.2	0	21	0	8	5	0
WBGene00000249	bir-1	T27F2.3	5	5	0	2	3	4
WBGene00000250	bir-2	C50B8.2	59	12	0	3	1	0
WBGene00000251	bli-1	C09G5.6	0	0	0	0	0	0
WBGene00000252	bli-2	F59E12.12	0	0	0	0	0	0
WBGene00000253	bli-3	F56C11.1	0	20	0	1	0	0
WBGene00000254	bli-4	K04F10.4	63	108	0	49	15	0
WBGene00000255	bli-5	F45G2.5	0	0	0	0	0	0
WBGene00000256	bli-6	Y73B6BL.34	0	0	0	0	0	0
WBGene00000257	bmk-1	F23B12.8	0	35	0	17	0	0
WBGene00000259	bpl-1	F13H8.10	8	24	0	3	0	0
WBGene00000262	bra-1	F54B11.6	0	6	0	1	0	0
WBGene00000263		F23H11.5	0	2	0	2	0	0
WBGene00000264	brc-1	C36A4.8	99	8	0	1	0	0
WBGene00000265	brd-1	K04C2.4	0	23	0	9	0	5
WBGene00000266	bre-1	C53B4.7	0	0	0	2	0	0
WBGene00000267	bre-2	Y39E4B.9	0	0	0	0	0	0
WBGene00000268	bre-3	B0464.4	68	106	0	12	9	0
WBGene00000269	bre-4	Y73E7A.7	153	3	0	1	0	0
WBGene00000270	bre-5	T12G3.8	0	2	0	0	1	0
WBGene00000271	brf-1	F45E12.2	5	62	0	6	6	0
WBGene00000272	bro-1	F56A3.5	0	0	0	0	0	0
WBGene00000273	brp-1	Y79H2A.1	0	2	0	0	0	0
WBGene00000274	btf-1	F15D4.1	1	72	0	17	2	0
WBGene00000275	bub-1	R06C7.8	213	11	0	5	1	0
WBGene00000276	byn-1	F57B9.5	0	34	0	11	1	0
WBGene00000277	cab-1	C23H4.1	0	0	0	4	0	0
WBGene00000279	cah-1	F54D8.4	0	0	0	0	0	0
WBGene00000280	cah-2	D1022.8	0	0	0	0	0	0
WBGene00000281	cah-3	K05G3.3	0	0	0	0	0	0
WBGene00000282	cah-4	R01E6.3	0	0	0	0	0	0
WBGene00000283	cah-5	R173.1	0	0	0	0	0	0
WBGene00000284	cah-6	T28F2.3	0	0	0	0	0	0
WBGene00000285	cal-1	C13C12.1	0	0	0	0	0	0
WBGene00000286	cal-2	C18E9.1	0	0	0	2	0	0
WBGene00000287	cal-3	M02B7.6	0	0	0	2	0	0
WBGene00000288	cal-4	T07G12.1	0	0	0	0	0	0
WBGene00000289	cam-1	C01G6.8	62	149	0	36	19	0
WBGene00000292	cap-1	D2024.6	102	19	9	37	13	0
WBGene00000293	cap-2	M106.5	0	7	0	10	4	0
WBGene00000294	cas-1	F41G4.2	0	8	0	2	1	18
WBGene00000295	cat-1	W01C8.6	0	0	0	0	0	0
WBGene00000296	cat-2	B0432.5	0	0	0	0	0	0
WBGene00000298	cat-4	F32G8.6	0	0	0	4	0	0
WBGene00000301	cav-1	T13F2.8	168	65	5	66	16	5
WBGene00000302	cav-2	C56A3.7	0	0	0	0	0	0
WBGene00000308		C04A11.t1	0	0	0	12	0	0
WBGene00000310		C05C9.t1	0	0	0	1	0	0
WBGene00000311		C05C9.t2	0	0	0	0	0	0
WBGene00000366	cbp-1	R10E11.1	7	82	0	53	48	7
WBGene00000367	cca-1	C54D2.5	0	0	0	2	0	0
WBGene00000368	ccb-1	T28F2.5	0	0	0	2	0	0
WBGene00000369	ccf-1	Y56A3A.20	104	109	18	28	27	6
WBGene00000370	ccg-1	Y73F8A.6	0	0	0	0	0	0
WBGene00000371	cco-1	F26E4.9	0	27	0	3	0	0
WBGene00000372	cyp-13A7	T10B9.10	0	0	0	0	0	0
WBGene00000373	cyp-14A5	F08F3.7	0	0	0	0	0	0
WBGene00000374	cyp-31A1	C01F6.3	0	0	0	2	0	0
WBGene00000375	cyp-44A1	ZK177.5	0	3	0	3	0	0
WBGene00000376	ccr-4	ZC518.3	81	187	0	85	50	10
WBGene00000377	cct-1	T05C12.7	215	228	0	111	2	0
WBGene00000378	cct-2	T21B10.7	179	97	0	38	6	13
WBGene00000379	cct-4	K01C8.10	244	145	0	11	0	0
WBGene00000380	cct-5	C07G2.3	198	186	0	31	2	0
WBGene00000381	cct-6	F01F1.8	312	141	1	24	3	0
WBGene00000382	cdc-6	C43E11.10	0	2	0	6	0	0
WBGene00000383	cdc-14	C17G10.4	69	218	17	45	10	1
WBGene00000386	cdc-25.1	K06A5.7	27	175	1	48	14	2
WBGene00000387	cdc-25.2	F16B4.8	169	77	16	37	20	1
WBGene00000388	cdc-25.3	ZK637.11	4	52	0	10	4	0
WBGene00000389	cdc-25.4	R05H5.2	0	0	0	0	0	0
WBGene00000390	cdc-42	R07G3.1	133	60	17	37	40	10
WBGene00000391	cdd-1	C47D2.2	0	0	0	0	0	0
WBGene00000392	cdd-2	F49E8.4	0	8	0	0	0	0
WBGene00000393	cdf-1	C15B12.7	0	1	0	2	1	0
WBGene00000395	cdh-3	ZK112.7	9	4	0	33	0	0
WBGene00000396	cdh-4	F25F2.2	46	55	0	95	4	0
WBGene00000397	cdh-5	F08B4.2	0	0	0	1	0	0
WBGene00000399	cdh-7	R05H10.6	0	0	0	0	0	0
WBGene00000401	cdh-9	F59C12.1	0	0	0	0	9	0
WBGene00000402	cdh-10	C45G7.5	0	0	0	0	0	0
WBGene00000403	casy-1	B0034.3	0	2	0	8	0	0
WBGene00000405	cdk-1	T05G5.3	0	69	0	28	2	0
WBGene00000406	cdk-4	F18H3.5	0	0	0	3	1	0
WBGene00000407	cdk-5	T27E9.3	0	80	0	6	1	0
WBGene00000408	cdk-7	Y39G10AL.3	0	8	0	32	0	0
WBGene00000409	cdk-8	F39H11.3	0	36	0	23	1	0
WBGene00000410	cdk-9	H25P06.2	2	13	28	9	0	0
WBGene00000411	cdl-1	R06F6.1	5	146	151	73	22	0
WBGene00000412	cdr-1	F35E8.11	0	0	0	0	0	0
WBGene00000413	cdt-1	Y54E10A.15	5	31	1	17	7	0
WBGene00000414	cec-1	ZK1236.2	0	6	0	9	0	3
WBGene00000415	ced-1	Y47H9C.4	3	11	0	28	1	0
WBGene00000416	ced-2	Y41D4B.13	119	71	0	32	4	0
WBGene00000417	ced-3	C48D1.2	89	132	0	21	19	2
WBGene00000418	ced-4	C35D10.9	75	83	0	12	5	1
WBGene00000419	ced-5	C02F4.1	56	172	0	36	3	0
WBGene00000420	ced-6	F56D2.7	145	89	2	7	9	0
WBGene00000421	ced-7	C48B4.4	0	34	0	20	2	5
WBGene00000422	ced-8	F08F1.5	0	13	0	4	0	0
WBGene00000423	ced-9	T07C4.8	0	3	0	5	2	0
WBGene00000424	ced-10	C09G12.8	5	31	12	14	21	1
WBGene00000425	ced-11	ZK512.3	0	2	0	23	49	0
WBGene00000426	ced-12	Y106G6E.5	0	3	0	21	0	0
WBGene00000427	ced-13	R09F10.9	0	0	0	0	0	0
WBGene00000428	ceh-1	F16H11.4	0	0	0	0	0	0
WBGene00000429	ceh-2	C27A12.5	0	0	0	0	0	0
WBGene00000430	ceh-5	C16C2.1	0	0	0	0	0	0
WBGene00000431	ceh-6	K02B12.1	0	0	0	0	0	0
WBGene00000432	ceh-7	C34C6.8	0	0	0	0	0	0
WBGene00000433	ceh-8	ZK265.4	0	0	0	0	0	0
WBGene00000434	ceh-9	Y65B4BR.9	0	0	0	0	0	0
WBGene00000435	ceh-10	W03A3.1	0	0	0	12	0	0
WBGene00000436	ceh-12	F33D11.4	0	0	0	0	0	0
WBGene00000437	ceh-13	R13A5.5	0	0	0	3	0	0
WBGene00000438	ceh-14	F46C8.5	0	0	0	0	0	0
WBGene00000439	ceh-16	C13G5.1	0	0	0	1	0	0
WBGene00000440	ceh-17	D1007.1	0	0	0	0	0	0
WBGene00000441	ceh-18	ZC64.3	0	0	0	0	0	0
WBGene00000442	ceh-19	F20D12.6	0	0	0	0	0	0
WBGene00000443	ceh-20	F31E3.1	0	0	0	11	1	2
WBGene00000444	ceh-21	T26C11.6	15	37	0	4	5	5
WBGene00000445	ceh-22	F29F11.5	45	0	0	0	0	0
WBGene00000446	ceh-23	ZK652.5	0	0	0	0	0	0
WBGene00000447	ceh-24	F55B12.1	0	0	0	0	0	0
WBGene00000448	pros-1	K12H4.1	0	0	0	2	0	0
WBGene00000449	ceh-27	F46F3.1	0	0	0	3	0	0
WBGene00000450	ceh-28	K03A11.3	0	0	0	0	0	0
WBGene00000451	ceh-30	C33D12.7	0	0	0	0	0	0
WBGene00000452	ceh-31	C33D12.1	0	0	0	0	0	0
WBGene00000453	ceh-32	W05E10.3	0	8	0	11	0	0
WBGene00000454	ceh-33	C10G8.7	0	0	0	0	0	0
WBGene00000455	ceh-34	C10G8.6	0	1	0	0	0	0
WBGene00000457	ceh-36	C37E2.4	0	0	0	0	0	0
WBGene00000458	ceh-37	C37E2.5	0	0	0	4	0	0
WBGene00000459	ceh-38	F22D3.1	11	87	13	35	18	3
WBGene00000460	ceh-39	T26C11.7	0	43	0	8	4	0
WBGene00000461	ceh-40	F17A2.5	0	6	0	3	0	0
WBGene00000462	ceh-41	T26C11.5	0	11	0	4	4	0
WBGene00000463	ceh-43	C28A5.4	0	3	0	13	0	0
WBGene00000464	ceh-44	Y54F10AM.4	49	8	0	20	3	0
WBGene00000465	cpg-1	C07G2.1	221	361	3	34	3	0
WBGene00000466	cel-1	C03D6.3	48	10	0	6	2	0
WBGene00000467	cep-1	F52B5.5	97	99	84	14	2	0
WBGene00000468	ces-1	F43G9.11	0	0	0	0	0	0
WBGene00000469	ces-2	ZK909.4	0	1	0	4	0	0
WBGene00000472	cey-1	F33A8.3	223	166	0	78	10	20
WBGene00000473	cey-2	F46F11.2	628	779	2	94	5	2
WBGene00000474	cey-3	M01E11.5	668	291	1	50	4	1
WBGene00000475	cey-4	Y39A1C.3	47	54	18	25	3	0
WBGene00000476	cfi-1	T23D8.8	0	0	0	1	0	0
WBGene00000477	cft-1	C18C4.2	0	0	0	0	0	0
WBGene00000478	cfz-2	F27E11.3	0	24	0	5	0	25
WBGene00000479	cgh-1	C07H6.5	2422	2568	85	293	67	7
WBGene00000480	cgp-1	Y38C9A.2	0	32	0	7	0	3
WBGene00000481	cha-1	ZC416.8	0	0	0	0	0	0
WBGene00000482	chd-3	T14G8.1	0	1	0	29	0	0
WBGene00000483	che-1	C55B7.12	0	0	0	0	0	0
WBGene00000484	che-2	F38G1.1	0	0	0	0	0	0
WBGene00000485	che-3	F18C12.1	0	0	0	3	0	27
WBGene00000487	che-6	C23H5.7	0	0	0	0	0	0
WBGene00000488	che-7	F26D11.10	0	0	0	0	0	0
WBGene00000490	che-11	C27A7.4	0	0	0	1	0	0
WBGene00000491	che-12	B0024.8	0	0	0	0	8	0
WBGene00000492	che-13	F59C6.7	0	0	0	0	0	0
WBGene00000493	che-14	F56H1.1	0	29	0	1	0	15
WBGene00000496	chs-1	T25G3.2	144	54	0	24	1	0
WBGene00000497	chs-2	F48A11.1	0	0	0	1	0	11
WBGene00000498	chk-1	Y39H10A.7	14	70	0	40	0	0
WBGene00000499	chk-2	Y60A3A.12	6	36	0	2	0	0
WBGene00000500	chn-1	T09B4.10	100	41	0	8	8	1
WBGene00000501	cho-1	C48D1.3	0	0	0	0	0	0
WBGene00000502	chp-1	Y110A7A.13	0	0	23	0	0	0
WBGene00000503	cht-1	C04F6.3	57	6	0	34	1	21
WBGene00000506	cic-1	H14E04.5	59	32	0	2	0	0
WBGene00000507	cit-1.1	F44B9.4	109	102	1	16	9	1
WBGene00000508	cit-1.2	F44B9.3	0	38	0	10	0	0
WBGene00000509	cka-1	C28D4.2	0	16	0	3	1	0
WBGene00000510	cka-2	C52B9.1	0	0	0	0	0	0
WBGene00000511	ckb-1	B0285.8	0	0	0	0	0	0
WBGene00000512	ckb-2	B0285.9	0	1	0	0	0	0
WBGene00000513	ckb-3	B0285.10	0	0	0	0	0	0
WBGene00000514	ckb-4	F22F7.5	0	6	0	1	0	0
WBGene00000515	ckc-1	T27A10.3	0	0	0	0	0	0
WBGene00000516	cki-1	T05A6.1	0	3	0	12	0	0
WBGene00000517	cki-2	T05A6.2	12	97	0	9	18	0
WBGene00000518	ckk-1	C05H8.1	0	0	0	0	0	0
WBGene00000519	cku-70	Y47D3A.4	0	4	0	2	1	0
WBGene00000520	cku-80	R07E5.8	18	10	0	3	1	0
WBGene00000521	cky-1	C15C8.2	0	0	0	0	0	0
WBGene00000522	clc-1	C09F12.1	0	0	0	1	0	0
WBGene00000523	clc-2	C01C10.1	0	0	0	7	0	0
WBGene00000524	clc-3	ZK563.4	0	0	0	0	0	0
WBGene00000525	clc-4	T05A10.2	0	0	0	0	0	0
WBGene00000526	clc-5	C01C10.4	0	0	0	4	0	4
WBGene00000527	cle-1	C36B1.1	0	0	0	0	0	0
WBGene00000528	clh-1	T27D12.2	0	0	0	1	0	0
WBGene00000529	clh-2	B0491.8	0	0	0	0	0	0
WBGene00000530	clh-3	E04F6.11	0	22	0	0	3	0
WBGene00000531	clh-4	T06F4.2	0	0	0	0	0	0
WBGene00000532	clh-5	C07H4.2	0	73	0	11	5	0
WBGene00000533	clh-6	R07B7.1	0	8	0	6	0	0
WBGene00000534	cpi-2	R01B10.1	0	1	0	5	2	0
WBGene00000535	cpi-1	K08B4.6	0	0	0	0	0	0
WBGene00000536	clk-1	ZC395.2	0	1	0	0	0	0
WBGene00000537	clk-2	C07H6.6	102	9	104	5	0	0
WBGene00000539	cln-3.1	F07B10.1	0	0	0	0	0	0
WBGene00000540	cln-3.2	C01G8.2	0	0	0	2	1	0
WBGene00000541	cln-3.3	ZC190.1	0	0	0	0	0	0
WBGene00000542	clp-1	C06G4.2	79	56	0	7	1	0
WBGene00000543	clp-2	T04A8.16	0	2	0	9	0	0
WBGene00000544	clp-3	Y47H10A.1	0	0	0	0	0	0
WBGene00000545	clp-4	Y39A3CL.5	0	0	0	0	0	0
WBGene00000546	clp-6	Y77E11A.10	0	0	0	0	0	0
WBGene00000547	clp-7	Y77E11A.11	12	14	0	5	4	0
WBGene00000548	clr-1	F56D1.4	77	357	0	39	14	3
WBGene00000549	cls-2	R107.6	6	76	0	37	0	1
WBGene00000550	clu-1	F55H2.6	54	164	93	45	9	0
WBGene00000551	clx-1	C50F7.2	0	0	0	0	0	0
WBGene00000552	cmd-1	T21H3.3	158	114	11	82	19	27
WBGene00000553	cmk-1	K07A9.2	0	0	0	0	0	0
WBGene00000554	cnb-1	F55C10.1	0	0	0	0	7	0
WBGene00000555	cnc-1	R09B5.2	0	0	0	0	0	0
WBGene00000556	cnc-2	R09B5.3	0	0	0	0	0	0
WBGene00000557	cnc-3	R09B5.8	0	0	0	0	0	0
WBGene00000558	cnc-4	R09B5.9	0	0	0	0	0	0
WBGene00000559	cnc-5	R09B5.10	0	0	0	0	0	0
WBGene00000560	cnc-6	Y46E12A.1	0	0	0	0	0	0
WBGene00000561	cnd-1	C34E10.7	0	0	0	1	0	0
WBGene00000562	cng-1	F14H8.6	0	0	0	0	0	0
WBGene00000563	cng-3	F38E11.12	0	0	0	0	0	0
WBGene00000564	cnk-1	R01H10.8	0	63	0	13	3	0
WBGene00000565	cnt-1	Y17G7B.15	19	51	0	15	2	0
WBGene00000566	cnt-2	Y39A1A.15	32	19	0	30	1	17
WBGene00000567	cnx-1	ZK632.6	245	100	0	36	0	0
WBGene00000583	cof-2	C48E7.5	0	0	0	1	0	0
WBGene00000584	cog-1	R03C1.3	0	0	0	0	0	0
WBGene00000585	cogc-2	C06G3.10	118	86	0	10	3	2
WBGene00000591	coh-1	K08A8.3	25	68	1	9	8	15
WBGene00000592	coh-3	F08H9.1	0	29	0	7	2	0
WBGene00000593	col-2	W01B6.7	0	0	0	0	0	0
WBGene00000594	col-3	T28C6.6	0	0	0	1	0	0
WBGene00000596	col-7	C15A11.5	0	0	0	0	0	0
WBGene00000597	col-8	F11H8.3	0	0	0	0	0	0
WBGene00000598	col-9	F54B11.1	0	0	0	0	0	0
WBGene00000599	col-10	B0222.8	0	0	0	1	0	0
WBGene00000601	col-12	F15H10.1	0	0	0	0	0	0
WBGene00000602	col-13	F15H10.2	0	0	0	0	0	0
WBGene00000603	col-14	C46A5.3	0	0	0	1	0	0
WBGene00000606	col-17	F11G11.10	0	0	0	0	0	0
WBGene00000608	col-19	ZK1193.1	0	0	0	0	0	0
WBGene00000609	col-20	F11G11.11	0	0	0	0	0	0
WBGene00000610	col-33	F36A4.6	0	0	0	0	0	0
WBGene00000611	col-34	F36A4.10	0	0	0	0	0	0
WBGene00000612	col-35	C15A11.1	0	0	0	0	0	0
WBGene00000613	col-36	C27H5.5	0	0	0	0	0	0
WBGene00000614	col-37	ZK863.2	0	0	0	0	0	0
WBGene00000615	col-38	F54C9.4	0	0	0	2	0	0
WBGene00000616	col-39	C09G5.4	0	0	0	0	0	0
WBGene00000617	col-40	T13B5.4	0	0	0	0	0	0
WBGene00000618	col-41	T10B10.1	0	0	0	0	0	0
WBGene00000620	col-43	ZC513.8	0	0	0	0	0	0
WBGene00000621	col-44	F54B11.2	0	0	0	0	0	0
WBGene00000622	col-45	F53G12.7	0	0	0	0	0	0
WBGene00000623	col-46	Y18H1A.13	0	0	0	0	0	0
WBGene00000624	col-47	Y18H1A.12	0	0	0	0	0	0
WBGene00000625	col-48	Y54E10BL.2	0	0	0	2	38	0
WBGene00000626	col-49	K09H9.3	0	0	0	0	0	0
WBGene00000627	col-50	T28F2.6	0	0	0	0	0	0
WBGene00000628	col-51	T28F2.8	0	0	0	0	0	0
WBGene00000629	col-52	D1007.2	0	0	0	0	0	0
WBGene00000630	col-53	M01A12.1	0	0	0	1	0	0
WBGene00000631	col-54	F33D11.3	0	0	0	0	0	0
WBGene00000632	col-55	T05E7.2	0	0	0	0	0	0
WBGene00000633	col-56	T08B2.2	0	0	0	0	0	0
WBGene00000634	col-58	F26B1.4	0	4	0	0	0	0
WBGene00000636	col-60	F22D6.10	0	0	0	4	0	0
WBGene00000637	col-61	C01H6.1	0	0	0	0	0	0
WBGene00000638	col-62	C15A11.6	0	0	0	0	0	0
WBGene00000639	col-63	ZK265.2	0	1	0	0	0	0
WBGene00000640	col-64	F52F12.2	0	0	0	0	0	0
WBGene00000641	col-65	K08C9.4	0	0	0	4	0	0
WBGene00000642	col-66	F15D3.3	0	0	0	0	0	0
WBGene00000644	col-68	C50D2.4	0	0	0	0	0	0
WBGene00000645	col-69	K01A2.7	0	0	0	0	0	0
WBGene00000646	col-70	H17B01.2	0	0	0	0	0	0
WBGene00000647	col-71	Y49F6B.10	0	0	0	0	0	0
WBGene00000648	col-72	W09G10.1	0	0	0	0	0	0
WBGene00000649	col-73	F11G11.12	0	0	0	0	0	0
WBGene00000650	col-74	ZK1248.2	0	0	0	0	6	30
WBGene00000651	col-75	K03H9.2	0	0	0	1	0	0
WBGene00000652	col-76	M110.1	0	0	0	1	0	0
WBGene00000653	col-77	M195.1	0	0	0	14	0	0
WBGene00000654	col-78	W07A12.5	0	0	0	0	0	0
WBGene00000655	col-79	C09G5.3	0	0	0	0	0	0
WBGene00000656	col-80	C09G5.5	0	0	0	0	0	0
WBGene00000657	col-81	F38A3.1	0	0	0	0	0	0
WBGene00000658	col-83	F33A8.9	0	0	0	0	0	0
WBGene00000659	col-84	K12D12.3	0	0	0	0	0	0
WBGene00000660	col-85	T21B4.2	0	0	0	0	0	0
WBGene00000661	col-86	Y81G3A.5	0	0	0	0	0	0
WBGene00000662	col-87	Y39G8C.4	0	0	0	0	0	0
WBGene00000663	col-88	W05G11.3	0	2	0	0	0	0
WBGene00000664	col-89	F17C8.2	0	0	0	0	0	0
WBGene00000665	col-90	C29E4.1	0	0	0	0	0	0
WBGene00000666	col-91	F09G8.6	0	0	0	0	0	0
WBGene00000667	col-92	W05B2.6	0	0	0	0	0	0
WBGene00000668	col-93	W05B2.5	0	0	0	0	0	0
WBGene00000669	col-94	W05B2.1	0	0	0	0	0	0
WBGene00000670	col-95	Y41C4A.16	0	0	0	0	0	0
WBGene00000671	col-96	Y41C4A.19	0	0	0	0	0	0
WBGene00000672	col-97	ZK1010.7	0	0	0	0	0	6
WBGene00000673	col-98	F14F7.1	0	0	0	0	0	0
WBGene00000674	col-99	F29C4.8	0	24	0	16	0	0
WBGene00000675	col-101	K02D7.3	0	0	0	0	0	0
WBGene00000676	col-102	C18H7.3	0	0	0	0	0	0
WBGene00000677	col-103	F56B3.1	0	0	0	0	0	0
WBGene00000678	col-104	F58F6.1	0	0	0	0	0	21
WBGene00000679	col-105	F58F6.2	0	0	0	0	0	0
WBGene00000680	col-106	Y77E11A.15	0	0	0	0	0	0
WBGene00000681	col-107	C34H4.4	0	0	0	1	0	0
WBGene00000682	col-108	Y41D4A.2	0	0	0	0	0	0
WBGene00000683	col-109	Y38C1BA.3	0	1	0	1	0	0
WBGene00000684	col-110	F19C7.7	0	0	0	0	0	0
WBGene00000685	col-111	F29B9.9	0	0	0	0	0	0
WBGene00000687	col-113	C34D4.15	0	0	0	0	0	0
WBGene00000688	col-114	D2024.8	0	0	0	0	0	0
WBGene00000689	col-115	Y42H9B.1	0	0	0	1	0	0
WBGene00000690	col-116	F17E9.1	0	0	0	0	0	0
WBGene00000691	col-117	T28C6.4	0	0	0	1	0	0
WBGene00000692	col-118	T11B7.3	0	0	0	1	0	0
WBGene00000693	col-119	C53B4.5	0	0	0	2	0	0
WBGene00000694	col-120	Y11D7A.11	0	0	0	0	0	0
WBGene00000695	col-121	F56D5.1	0	1	0	8	0	0
WBGene00000696	col-122	T05A1.2	0	0	0	0	0	0
WBGene00000697	col-123	W08D2.6	0	0	0	0	0	0
WBGene00000698	col-124	C24F3.6	0	0	0	0	0	0
WBGene00000699	col-125	C29F4.1	0	1	0	14	0	0
WBGene00000700	col-126	F54D1.2	0	0	0	0	0	0
WBGene00000701	col-127	F54D1.3	0	0	0	0	0	0
WBGene00000702	col-128	F12F6.9	0	0	0	0	0	0
WBGene00000703	col-129	M18.1	0	0	0	0	0	0
WBGene00000704	col-130	F08G5.4	0	0	0	0	0	0
WBGene00000705	col-131	C39E9.3	0	0	0	0	0	0
WBGene00000706	col-132	C39E9.9	0	0	0	0	0	0
WBGene00000707	col-133	F52B11.4	0	0	0	0	0	0
WBGene00000708	col-135	M199.5	0	0	0	0	0	0
WBGene00000709	col-136	Y51H4A.28	0	0	0	0	0	0
WBGene00000710	col-137	Y51H4A.9	0	0	0	0	0	0
WBGene00000711	col-138	C52D10.13	0	0	0	0	0	0
WBGene00000712	col-139	F41F3.4	0	0	0	0	0	0
WBGene00000713	col-140	F26F12.1	0	0	0	0	0	0
WBGene00000714	col-141	T15B7.5	0	0	0	0	0	0
WBGene00000715	col-142	T15B7.4	0	0	0	0	0	0
WBGene00000716	col-143	T15B7.3	0	0	0	0	0	0
WBGene00000717	col-144	B0222.6	0	0	0	0	0	9
WBGene00000718	col-145	B0222.7	0	0	0	0	0	0
WBGene00000719	col-146	T06E4.6	0	0	0	0	0	0
WBGene00000720	col-147	T06E4.4	0	0	0	0	0	0
WBGene00000721	col-148	C12D8.8	0	0	0	0	0	0
WBGene00000722	col-149	B0024.1	0	0	0	0	0	0
WBGene00000723	col-150	B0024.2	0	0	0	0	0	0
WBGene00000724	col-151	AC3.6	0	0	0	0	0	0
WBGene00000725	col-152	F32G8.5	0	0	0	0	0	0
WBGene00000726	col-153	F17C11.3	0	0	0	0	0	0
WBGene00000727	col-154	F55C10.2	0	0	0	0	0	0
WBGene00000728	col-155	F55C10.3	0	0	0	0	0	0
WBGene00000729	col-156	F57B7.3	0	0	0	0	0	0
WBGene00000730	col-157	T11F9.9	0	0	0	0	0	0
WBGene00000731	col-158	D2023.7	0	0	0	0	0	0
WBGene00000732	col-159	F57B1.3	0	0	0	0	0	0
WBGene00000733	col-160	F57B1.4	0	0	0	0	0	0
WBGene00000734	col-161	C50B6.4	0	0	0	0	0	0
WBGene00000735	col-162	Y2H9A.3	0	0	0	0	0	0
WBGene00000736	col-163	F46B3.17	0	0	0	0	0	0
WBGene00000737	col-164	T21D9.1	0	0	0	0	0	0
WBGene00000738	col-165	F14H12.1	0	0	0	2	0	1
WBGene00000739	col-166	T07H6.3	0	0	0	0	0	0
WBGene00000740	col-167	T10E10.2	0	0	0	0	0	0
WBGene00000741	col-168	T10E10.1	0	0	0	0	0	0
WBGene00000742	col-169	T10E10.5	0	0	0	0	0	0
WBGene00000743	col-170	T10E10.6	0	0	0	0	0	0
WBGene00000744	col-171	T10E10.7	0	0	0	0	0	0
WBGene00000745	col-172	F38B6.5	0	0	0	0	0	0
WBGene00000746	col-173	F41C6.5	0	0	0	0	0	0
WBGene00000747	col-174	F46C8.2	0	0	0	0	0	0
WBGene00000748	col-175	C35B8.1	0	0	0	0	0	0
WBGene00000749	col-176	ZC373.7	0	0	0	0	0	0
WBGene00000750	col-177	F59F3.2	0	0	0	0	0	0
WBGene00000751	col-178	C34F6.2	0	0	0	0	0	0
WBGene00000752	col-179	C34F6.3	0	0	0	0	0	0
WBGene00000753	col-180	C44C10.1	0	0	0	0	0	0
WBGene00000754	col-181	W03G11.1	0	0	0	0	0	0
WBGene00000755	col-182	R09A8.4	0	0	0	0	0	3
WBGene00000756	col-183	F02D10.1	0	0	0	0	0	0
WBGene00000757	col-184	F15A2.1	0	0	0	0	0	0
WBGene00000758	col-185	H06A10.2	0	0	0	0	0	0
WBGene00000759	col-186	E03G2.4	0	0	0	0	0	0
WBGene00000760	col-187	C30F2.1	0	0	0	0	0	0
WBGene00000761	coq-1	C24A11.9	0	36	0	3	2	0
WBGene00000762	coq-2	F57B9.4	0	53	0	3	0	0
WBGene00000763	coq-3	Y57G11C.11	0	9	0	3	8	0
WBGene00000764	coq-4	T03F1.2	0	0	0	1	0	0
WBGene00000765	coq-5	ZK652.9	0	2	0	1	1	0
WBGene00000766	coq-6	K07B1.2	6	12	0	1	0	0
WBGene00000767	coq-8	C35D10.4	79	46	1	4	4	1
WBGene00000768	cor-1	R01H10.3	0	0	0	2	0	0
WBGene00000770	cpb-1	C40H1.1	19	180	0	15	11	0
WBGene00000771	cpb-2	C30B5.3	0	0	0	0	0	0
WBGene00000772	cpb-3	B0414.5	142	174	10	12	12	0
WBGene00000773	cpf-1	F28C6.3	135	30	1	25	4	2
WBGene00000774	cpf-2	F56A8.6	0	3	0	3	0	4
WBGene00000775	cpin-1	F38E11.3	0	0	0	0	0	0
WBGene00000776	cpl-1	T03E6.7	0	2	0	2	0	0
WBGene00000777	cpn-1	F43G9.9	59	112	0	2	11	0
WBGene00000778	cpn-2	D1069.2	0	0	0	0	0	0
WBGene00000779	cpn-3	F28H1.2	60	0	0	1	0	0
WBGene00000780	cpn-4	F49D11.8	0	0	0	0	0	0
WBGene00000781	cpr-1	C52E4.1	0	0	0	0	0	0
WBGene00000782	cpr-2	F36D3.9	0	3	0	0	0	0
WBGene00000783	cpr-3	T10H4.12	0	0	0	0	0	0
WBGene00000784	cpr-4	F44C4.3	0	0	0	0	0	0
WBGene00000785	cpr-5	W07B8.5	0	0	0	0	0	0
WBGene00000786	cpr-6	C25B8.3	0	0	0	0	0	0
WBGene00000787	cps-6	C41D11.8	0	20	0	1	0	0
WBGene00000788	cpz-1	F32B5.8	0	0	0	0	0	0
WBGene00000789	cpz-2	M04G12.2	0	1	0	0	0	0
WBGene00000792	crb-1	F11C7.4	0	1	0	13	0	0
WBGene00000793	crh-1	Y41C4A.4	0	2	0	20	3	2
WBGene00000794	crn-1	Y47G6A.8	0	38	0	5	11	0
WBGene00000795	crn-2	CD4.2	0	0	0	0	0	0
WBGene00000796	crn-3	C14A4.4	145	24	0	5	1	0
WBGene00000797	crn-4	AH9.2	26	26	0	1	5	0
WBGene00000798	crn-5	C14A4.5	46	1	0	5	1	0
WBGene00000799	crn-6	K04H4.6	0	0	0	2	0	0
WBGene00000800	cars-1	Y23H5A.7	267	82	0	13	8	0
WBGene00000801	cars-2	Y23H5A.1	0	0	0	6	1	0
WBGene00000802	crt-1	Y38A10A.5	119	93	1	52	10	4
WBGene00000803	csb-1	F53H4.1	186	36	0	4	0	0
WBGene00000804	csc-1	Y48E1B.12	0	17	0	3	5	0
WBGene00000812	csk-1	Y48G1C.2	200	43	1	12	5	0
WBGene00000813	csn-1	Y59A8A.1	0	32	0	3	5	0
WBGene00000814	csn-2	B0025.2	0	3	0	2	2	0
WBGene00000815	csn-3	Y38C1AA.2	0	89	0	3	0	0
WBGene00000816	csn-4	Y55F3AM.15	0	9	0	8	1	0
WBGene00000817	csn-5	B0547.1	0	23	0	11	0	0
WBGene00000818	csn-6	Y67H2A.6	0	17	0	2	0	0
WBGene00000819	csp-1	Y48E1B.13	0	0	0	0	0	0
WBGene00000820	csp-2	Y73B6BL.7	0	0	0	0	0	0
WBGene00000821	csp-3	Y47H9C.6	0	0	0	0	0	0
WBGene00000822	csq-1	F40E10.3	0	0	0	1	0	0
WBGene00000829	ctb-1	MTCE.21	0	25	0	30	5	14
WBGene00000830	ctl-1	Y54G11A.6	0	0	0	0	0	0
WBGene00000831	ctl-2	Y54G11A.5	0	0	0	2	1	0
WBGene00000832	ctn-1	Y23H5A.5	2	32	1	1	0	4
WBGene00000833	cts-1	T20G5.2	25	173	0	38	5	5
WBGene00000834	cua-1	Y76A2A.2	0	32	0	18	5	0
WBGene00000835	cuc-1	ZK652.11	0	0	0	1	4	4
WBGene00000836	cul-1	D2045.6	0	40	0	19	8	0
WBGene00000837	cul-2	ZK520.4	0	74	0	22	3	0
WBGene00000838	cul-3	Y108G3AL.1	127	139	0	36	19	4
WBGene00000839	cul-4	F45E12.3	0	6	0	6	0	0
WBGene00000840	cul-5	ZK856.1	7	69	0	9	4	0
WBGene00000841	cul-6	K08E7.7	0	0	0	0	0	0
WBGene00000843	cup-2	F25D7.1	0	59	0	8	0	5
WBGene00000845	cup-4	C02C2.3	0	0	0	0	0	0
WBGene00000846	cup-5	R13A5.1	52	42	1	7	13	0
WBGene00000851	cut-1	C47G2.1	0	0	0	0	0	0
WBGene00000853	cut-6	M142.2	0	0	0	0	0	0
WBGene00000854	cux-7	C07H6.8	2	17	0	6	0	0
WBGene00000857	cwn-1	K10B4.6	0	2	0	4	0	0
WBGene00000858	cwn-2	W01B6.1	0	0	0	1	0	0
WBGene00000859	cwp-1	C37H5.10	0	0	0	0	0	0
WBGene00000860	cwp-2	C37H5.11	0	0	0	0	0	0
WBGene00000861	cwp-3	C37H5.4	0	0	0	0	0	0
WBGene00000862	cwp-4	K11D12.1	0	0	0	0	0	0
WBGene00000863	cya-1	ZK507.6	0	23	0	42	4	0
WBGene00000864	cya-2	F59H6.7	0	0	0	0	0	0
WBGene00000865	cyb-1	ZC168.4	153	184	3	40	30	3
WBGene00000866	cyb-2.1	Y43E12A.1	114	50	1	7	8	0
WBGene00000867	cyb-2.2	H31G24.4	43	124	22	18	20	1
WBGene00000868	cyb-3	T06E6.2	124	157	0	104	30	0
WBGene00000869	cyc-1	C54G4.8	85	111	37	37	9	21
WBGene00000870	cyd-1	Y38F1A.5	0	3	0	5	1	0
WBGene00000871	cye-1	C37A2.4	124	68	2	9	16	2
WBGene00000872	cyk-1	F11H8.4	0	52	0	3	1	3
WBGene00000874	cyk-3	ZK328.1	81	76	0	18	2	1
WBGene00000875	cyk-4	K08E3.6	34	14	0	21	3	0
WBGene00000876	cyl-1	C52E4.6	0	2	0	2	0	0
WBGene00000877	cyn-1	Y49A3A.5	0	1	0	1	0	0
WBGene00000878	cyn-2	ZK520.5	0	0	0	0	0	0
WBGene00000879	cyn-3	Y75B12B.5	243	57	0	7	5	0
WBGene00000880	cyn-4	F59E10.2	0	2	0	2	0	0
WBGene00000881	cyn-5	F31C3.1	0	4	0	35	3	0
WBGene00000882	cyn-6	F42G9.2	0	2	0	14	0	0
WBGene00000883	cyn-7	Y75B12B.2	133	235	1	39	2	0
WBGene00000884	cyn-8	D1009.2	0	17	0	20	6	0
WBGene00000885	cyn-9	T27D1.1	0	7	0	1	0	0
WBGene00000886	cyn-10	B0252.4	0	1	0	3	1	0
WBGene00000887	cyn-11	T01B7.4	0	2	0	3	4	0
WBGene00000888	cyn-12	C34D4.12	0	2	0	0	0	0
WBGene00000889	cyn-13	Y116A8C.34	0	1	0	8	0	0
WBGene00000890	sig-7	F39H2.2	0	0	0	0	0	0
WBGene00000891	cyn-15	Y87G2A.6	0	1	0	21	0	0
WBGene00000892	cyn-16	Y17G7B.9	0	6	0	1	1	0
WBGene00000893	cyn-17	ZC250.1	0	0	0	0	0	0
WBGene00000894	dab-1	M110.5	666	721	10	59	43	3
WBGene00000895	dac-1	B0412.1	0	0	0	0	0	0
WBGene00000896	dad-1	F57B10.10	0	25	0	8	5	0
WBGene00000897	daf-1	F29C4.1	171	7	0	44	8	0
WBGene00000898	daf-2	Y55D5A.5	85	62	0	38	3	11
WBGene00000899	daf-3	F25E2.5	8	18	0	5	1	0
WBGene00000900	daf-4	C05D2.1	0	27	0	6	8	0
WBGene00000901	daf-5	W01G7.1	48	15	0	7	2	20
WBGene00000902	daf-6	F31F6.5	0	0	0	4	0	0
WBGene00000903	daf-7	B0412.2	0	0	0	0	0	0
WBGene00000904	daf-8	R05D11.1	0	0	0	0	0	0
WBGene00000905	daf-9	T13C5.1	0	0	0	0	0	0
WBGene00000906	daf-10	F23B2.4	0	0	0	0	0	0
WBGene00000907	daf-11	B0240.3	0	0	0	0	0	0
WBGene00000908	daf-12	F11A1.3	6	0	0	0	0	0
WBGene00000910	daf-14	F01G10.8	0	3	0	0	1	0
WBGene00000911	daf-15	C10C5.6	18	170	0	23	6	0
WBGene00000912	daf-16	R13H8.1	105	87	6	27	6	6
WBGene00000913	daf-18	T07A9.6	81	229	7	39	67	1
WBGene00000914	daf-19	F33H1.1	0	29	0	3	0	4
WBGene00000915	daf-21	C47E8.5	398	347	1	53	27	11
WBGene00000917	daf-25	Y48G1A.3	0	4	0	0	1	0
WBGene00000920	daf-28	Y116F11B.1	0	0	0	0	0	0
WBGene00000923	daf-31	K07H8.3	0	34	0	15	1	0
WBGene00000923	daf-31		0	34	0	15	1	0
WBGene00000928	dao-2	M03A1.7	0	3	0	6	0	0
WBGene00000929	dao-3	K07E3.3	0	0	0	9	0	0
WBGene00000930	dao-4	ZC373.6	0	0	0	0	0	0
WBGene00000931	dao-5	C25A1.10	3	25	0	24	2	7
WBGene00000932	dao-6	T05G5.12	0	0	0	0	0	0
WBGene00000933	dap-3	C14A4.2	0	5	0	11	1	0
WBGene00000934	dat-1	T23G5.5	0	0	0	0	0	4
WBGene00000935	daz-1	F56D1.7	28	336	162	60	27	4
WBGene00000936	dbl-1	T25F10.2	0	0	0	0	0	0
WBGene00000937	dbr-1	C55B7.8	117	34	0	3	0	0
WBGene00000938	dcp-66	C26C6.5	12	15	62	13	2	3
WBGene00000939	dcr-1	K12H4.8	0	26	0	7	2	0
WBGene00000940	dcs-1	Y113G7A.9	0	7	0	0	0	0
WBGene00000941	ddp-1	Y39A3CR.4	0	1	0	3	0	0
WBGene00000942	deb-1	ZC477.9	0	0	0	9	0	37
WBGene00000950	deg-1	C47C12.6	0	0	0	0	0	0
WBGene00000951	deg-3	K03B8.9	0	0	0	0	0	0
WBGene00000952	del-1	E02H4.1	0	0	0	0	0	0
WBGene00000953	del-2	F58G6.6	0	0	0	0	0	0
WBGene00000955	des-2	T26H10.1	0	0	0	0	0	0
WBGene00000958	dgk-1	C09E10.2	0	0	0	7	0	0
WBGene00000959	dgk-2	F46H6.2	0	16	0	21	0	0
WBGene00000960	dgk-3	F54G8.2	0	0	0	0	0	0
WBGene00000961	dgn-1	T21B6.1	0	9	0	8	0	0
WBGene00000962	dhc-1	T21E12.4	8	92	0	43	3	0
WBGene00000963	dhp-1	R06C7.3	0	0	0	0	0	0
WBGene00000964	dhp-2	C47E12.8	0	0	0	0	0	0
WBGene00000965	dhs-1	C01G8.3	0	125	0	8	10	0
WBGene00000966	dhs-2	F55A12.4	0	0	0	0	0	0
WBGene00000967	dhs-3	T02E1.5	0	0	0	0	0	0
WBGene00000968	dhs-4	T05F1.10	0	0	0	0	0	0
WBGene00000969	dhs-5	F56D1.5	0	2	0	0	0	0
WBGene00000970	dhs-6	C17G10.8	42	21	0	7	3	0
WBGene00000971	dhs-7	E04F6.7	0	0	0	0	0	0
WBGene00000972	dhs-8	K10H10.3	0	3	0	1	0	0
WBGene00000973	dhs-9	Y32H12A.3	0	4	0	0	0	0
WBGene00000974	dhs-11	Y39A1A.11	0	0	0	0	0	0
WBGene00000975	dhs-12	K08F4.9	0	0	0	3	2	0
WBGene00000976	dhs-13	F36H9.3	5	49	0	23	0	0
WBGene00000977	dhs-14	R05D8.8	0	0	0	0	0	0
WBGene00000978	dhs-15	R05D8.10	0	0	0	0	0	0
WBGene00000979	dhs-16	C10F3.2	0	0	0	0	0	0
WBGene00000980	dhs-17	F29G9.6	0	4	0	0	0	0
WBGene00000981	dhs-18	C45B11.3	0	0	0	0	0	0
WBGene00000982	dhs-19	T11F9.11	0	1	0	0	0	0
WBGene00000983	dhs-20	F35B12.2	0	0	0	0	0	0
WBGene00000984	dhs-21	R11D1.11	0	0	0	0	0	0
WBGene00000985	dhs-22	C15H11.4	8	54	0	19	8	0
WBGene00000986	dhs-23	R08H2.1	0	0	0	0	0	0
WBGene00000987	dhs-24	Y60A3A.10	57	5	0	8	0	0
WBGene00000988	dhs-25	F09E10.3	0	0	0	0	1	1
WBGene00000989	dhs-26	ZK816.5	0	0	0	0	0	0
WBGene00000990	dhs-27	C04F6.5	0	2	0	4	0	0
WBGene00000991	dhs-28	M03A8.1	0	0	0	13	0	0
WBGene00000992	dhs-29	F27D9.6	0	0	0	8	0	0
WBGene00000993	dhs-30	T25G12.7	0	23	0	0	0	0
WBGene00000994	dic-1	F08B4.1	0	34	0	7	4	6
WBGene00000995	die-1	C18D1.1	7	55	1	21	0	0
WBGene00000996	dif-1	F49E8.5	0	6	0	6	1	0
WBGene00000998	dig-1	K07E12.1	0	2	3	8	0	2
WBGene00001000	dim-1	C18A11.7	0	1	0	1	2	0
WBGene00001001	dis-3	C04G2.6	103	7	0	6	1	3
WBGene00001002	div-1	R01H10.1	0	42	0	12	6	0
WBGene00001005	dlc-1	T26A5.9	368	285	0	65	13	1
WBGene00001006	dlg-1	C25F6.2	49	71	0	71	3	5
WBGene00001007	dli-1	C39E9.14	32	5	0	2	0	0
WBGene00001008	dlk-1	F33E2.2	0	2	0	5	0	0
WBGene00001016	dna-2	F43G6.1	0	19	0	8	1	0
WBGene00001017	dnc-1	ZK593.5	0	27	0	29	1	0
WBGene00001018	dnc-2	C28H8.12	1	3	0	2	4	0
WBGene00001019	dnj-1	B0035.14	75	30	0	13	3	2
WBGene00001020	dnj-2	B0035.2	0	10	0	2	6	1
WBGene00001021	dnj-3	C01G10.12	0	0	0	0	0	0
WBGene00001022	dnj-4	C01G8.4	0	0	0	1	1	0
WBGene00001023	dnj-5	C04A2.7	277	349	1	59	29	2
WBGene00001025	dnj-7	C55B6.2	37	45	3	7	1	0
WBGene00001026	dnj-8	C56C10.13	13	86	29	23	14	0
WBGene00001027	dnj-9	F11G11.7	61	35	0	11	14	0
WBGene00001028	dnj-10	F22B7.5	94	20	0	4	5	0
WBGene00001029	dnj-11	F38A5.13	55	94	1	29	9	0
WBGene00001030	dnj-12	F39B2.10	232	42	0	18	8	4
WBGene00001031	dnj-13	F54D5.8	0	69	0	10	6	13
WBGene00001032	dnj-14	K02G10.8	1	1	0	7	3	0
WBGene00001033	dnj-15	K08D10.2	0	17	0	6	0	0
WBGene00001034	dnj-16	R74.4	0	21	0	11	1	0
WBGene00001035	dnj-17	T03F6.2	0	12	0	1	0	0
WBGene00001036	dnj-18	T04A8.9	0	8	0	2	0	0
WBGene00001037	dnj-19	T05C3.5	0	31	0	5	1	0
WBGene00001038	dnj-20	T15H9.7	0	6	0	25	2	7
WBGene00001039	dnj-21	T19B4.4	0	0	0	3	1	0
WBGene00001040	dnj-22	T23B12.7	0	9	0	8	0	0
WBGene00001041	dnj-23	T24H10.3	34	45	1	3	0	0
WBGene00001042	dnj-24	W03A5.7	0	0	0	2	0	0
WBGene00001043	dnj-25	W07A8.3	0	12	0	5	0	0
WBGene00001044	dnj-26	Y39C12A.8	0	5	0	0	2	0
WBGene00001045	dnj-27	Y47H9C.5	0	20	0	8	1	0
WBGene00001046	dnj-28	Y54E10BL.4	0	81	0	4	2	0
WBGene00001047	dnj-29	Y63D3A.6	106	46	0	12	2	0
WBGene00001048	dnj-30	Y71F9B.16	0	6	0	6	0	0
WBGene00001049	dog-1	F33H2.1	0	59	46	5	0	0
WBGene00001050	dom-3	F54C1.2	0	1	0	2	0	0
WBGene00001051	cks-1	C09G4.3	34	102	0	34	30	0
WBGene00001052	dop-1	F15A8.5	0	0	0	0	0	0
WBGene00001053	dop-2	K09G1.4	0	0	0	2	0	0
WBGene00001054	dpf-1	T23F1.7	0	0	0	0	0	0
WBGene00001055	dpf-2	C27C12.7	0	0	0	0	0	0
WBGene00001056	dpf-3	K02F2.1	0	43	0	22	20	0
WBGene00001057	dpf-4	F01F1.5	0	6	0	3	1	0
WBGene00001058	dpf-5	R11E3.8	104	66	0	6	1	0
WBGene00001059	dpf-6	F44B9.1	0	0	0	0	0	0
WBGene00001060	dpf-7	R11E3.7	0	2	0	23	10	0
WBGene00001061	dpl-1	T23G7.1	6	73	0	15	7	0
WBGene00001062	dpr-1	R10D12.2	0	0	0	0	0	0
WBGene00001063	dpy-1	M01E10.2	0	1	0	3	0	0
WBGene00001064	dpy-2	T14B4.6	0	0	0	6	0	0
WBGene00001065	dpy-3	EGAP7.1	0	0	0	8	0	16
WBGene00001066	dpy-4	Y41E3.2	0	0	0	0	0	0
WBGene00001067	dpy-5	F27C1.8	0	0	0	0	0	0
WBGene00001068	dpy-6	F16F9.2	0	0	0	0	0	0
WBGene00001069	dpy-7	F46C8.6	0	0	0	1	0	9
WBGene00001070	dpy-8	C31H2.2	0	0	0	0	0	0
WBGene00001071	dpy-9	T21D12.2	0	0	0	0	0	0
WBGene00001072	dpy-10	T14B4.7	0	0	0	2	1	0
WBGene00001073	dpy-11	F46E10.9	3	11	0	28	1	12
WBGene00001074	dpy-13	F30B5.1	0	0	0	0	0	0
WBGene00001075	dpy-14	H27M09.4	0	0	0	31	2	12
WBGene00001076	dpy-17	F54D8.1	0	25	0	97	0	21
WBGene00001077	dpy-18	Y47D3B.10	0	0	0	5	0	0
WBGene00001078	dpy-19	F22B7.10	0	1	0	2	0	0
WBGene00001079	dpy-20	T22B3.1	0	0	0	0	0	0
WBGene00001080	dpy-21	Y59A8B.1	7	152	130	52	1	40
WBGene00001081	dpy-22	F47A4.2	0	4	0	29	0	0
WBGene00001082	dpy-23	R160.1	62	39	0	36	9	14
WBGene00001085	dpy-26	C25G4.5	62	5	0	7	0	1
WBGene00001086	dpy-27	R13G10.1	4	23	0	14	2	1
WBGene00001087	dpy-28	Y39A1B.3	0	65	0	36	8	2
WBGene00001088	dpy-30	ZK863.6	3	12	8	7	16	2
WBGene00001089	dre-1	K04A8.6	0	39	0	8	0	0
WBGene00001090	drh-1	F15B10.2	0	27	0	10	0	0
WBGene00001091	drh-2	C01B10.1	0	0	0	0	0	1
WBGene00001092	dro-1	F53A2.5	0	9	0	1	0	0
WBGene00001093	drp-1	T12E12.4	38	43	12	18	3	0
WBGene00001094	dars-1	B0464.1	192	80	1	19	4	0
WBGene00001095	dars-2	F10C2.6	0	3	0	4	0	0
WBGene00001096	dsc-1	C18B12.3	0	0	0	0	0	0
WBGene00001099	dsc-4	K02D7.4	0	0	0	0	0	18
WBGene00001101	dsh-1	C34F11.9	3	21	0	14	3	0
WBGene00001102	dsh-2	C27A2.6	90	65	0	19	22	3
WBGene00001103	dsl-1	W09G12.4	0	0	0	1	0	0
WBGene00001104	dsl-2	W09G12.1	0	1	0	1	0	0
WBGene00001105	dsl-3	Y41D4B.10	0	0	0	1	0	0
WBGene00001106	dsl-4	F16B12.2	0	0	0	0	0	0
WBGene00001107	dsl-5	F58B3.8	0	0	0	0	0	0
WBGene00001108	dsl-6	H02I12.4	0	0	0	0	0	0
WBGene00001109	dsl-7	F15B9.9	0	0	0	0	0	1
WBGene00001110	duo-1	F38B7.5	7	35	0	2	0	0
WBGene00001111	duo-2	F29C4.5	0	0	0	0	0	0
WBGene00001112	duo-3	Y106G6H.12	0	15	0	2	0	0
WBGene00001113	dur-1	F25H8.5	0	0	0	2	0	0
WBGene00001115	dyb-1	F47G6.1	0	0	0	2	0	4
WBGene00001116	dyc-1	C33G3.1	0	13	0	9	0	0
WBGene00001117	dyf-1	F54C1.5	0	4	0	0	0	0
WBGene00001118	dyf-2	ZK520.3	0	0	0	0	0	0
WBGene00001119	dyf-3	C04C3.5	0	0	0	0	0	0
WBGene00001121	dyf-5	M04C9.5	0	0	0	0	0	0
WBGene00001122	dyf-6	F46F6.4	0	0	0	0	0	0
WBGene00001123	dyf-7	C43C3.3	0	0	0	6	0	0
WBGene00001127	dyf-11	C02H7.1	0	0	0	0	0	0
WBGene00001129	dyf-13	C27H5.7	0	0	0	0	0	0
WBGene00001130	dyn-1	C02C6.1	0	122	0	11	15	2
WBGene00001131	dys-1	F15D3.1	0	0	0	32	0	4
WBGene00001132	alp-1	T11B7.4	0	0	0	1	0	0
WBGene00001133	eat-2	Y48B6A.4	4	0	0	0	0	0
WBGene00001134	eat-3	D2013.5	15	8	0	21	57	0
WBGene00001135	eat-4	ZK512.6	1	0	0	0	0	0
WBGene00001136	eat-5	F13G3.8	0	0	0	0	0	0
WBGene00001137	eat-6	B0365.3	882	778	104	108	29	2
WBGene00001145	eat-16	C16C2.2	0	0	0	4	1	5
WBGene00001147	eat-18	Y105E8A.7	0	0	0	0	0	0
WBGene00001148	eat-20	H30A04.1	4	56	0	21	1	0
WBGene00001149	bcat-1	K02A4.1	72	0	0	0	0	0
WBGene00001150	ech-1	C29F3.1	0	0	0	0	0	0
WBGene00001150	ech-1.1	C29F3.1	0	0	0	0	0	0
WBGene00001151	ech-2	F38H4.8	138	14	0	3	4	1
WBGene00001152	ech-3	F43H9.1	0	0	0	1	0	0
WBGene00001153	ech-4	R06F6.9	0	9	0	5	1	1
WBGene00001154	ech-5	F56B3.5	1	5	0	0	0	0
WBGene00001155	ech-6	T05G5.6	1	4	12	5	7	0
WBGene00001156	ech-7	Y105E8A.4	0	0	0	0	0	0
WBGene00001157	ech-8	F01G10.2	0	0	0	0	0	0
WBGene00001158	ech-9	F01G10.3	0	0	0	0	0	0
WBGene00001159	eff-1	C26D10.5	0	0	0	1	0	28
WBGene00001160	efk-1	F42A10.4	0	23	0	6	17	0
WBGene00001161	efl-1	Y102A5C.18	0	0	0	8	0	1
WBGene00001162	efl-2	Y48C3A.17	0	3	0	2	2	0
WBGene00001163	efn-2	C43F9.8	0	1	0	0	0	0
WBGene00001164	efn-3	F15A2.5	0	0	0	0	0	0
WBGene00001165	efn-4	F56A11.3	0	5	0	3	0	0
WBGene00001166	eftu-2	ZK328.2	33	1	1	26	0	0
WBGene00001167	eef-2	F25H5.4	13	158	1	128	4	4
WBGene00001168	eef-1A.1	F31E3.5	212	369	2	185	6	6
WBGene00001169	eef-1A.2	R03G5.1	60	31	0	94	0	3
WBGene00001170	egl-1	F23B12.9	0	0	0	1	0	0
WBGene00001171	egl-2	F16B3.1	0	1	0	1	0	0
WBGene00001172	egl-3	C51E3.7	8	0	0	0	0	29
WBGene00001173	egl-4	F55A8.2	79	90	0	62	15	0
WBGene00001174	egl-5	C08C3.1	0	1	0	0	0	0
WBGene00001175	egl-6	C46F4.1	110	29	0	0	1	0
WBGene00001177	egl-8	B0348.4	5	59	0	6	1	0
WBGene00001178	egl-9	F22E12.4	5	95	0	12	1	14
WBGene00001179	egl-10	F28C1.2	56	15	0	3	2	0
WBGene00001182	egl-13	T22B7.1	0	0	0	0	11	14
WBGene00001184	egl-15	F58A3.2	0	0	0	0	0	0
WBGene00001185	egl-17	F38G1.2	0	0	0	0	0	0
WBGene00001186	egl-18	F55A8.1	15	77	0	33	10	0
WBGene00001187	egl-19	C48A7.1	0	17	0	0	0	27
WBGene00001188	egl-20	W08D2.1	0	0	0	1	0	0
WBGene00001189	egl-21	F01D4.4	0	0	0	0	0	0
WBGene00001190	egl-23	Y37A1B.11	0	0	0	0	0	0
WBGene00001193	egl-26	C23H3.1	0	4	0	5	1	0
WBGene00001194	egl-27	C04A2.3	28	52	0	31	5	19
WBGene00001196	egl-30	M01D7.7	155	29	1	74	19	20
WBGene00001202	egl-36	R07A4.1	0	0	0	0	0	0
WBGene00001204	egl-38	C04G2.7	0	0	0	1	0	0
WBGene00001207	egl-43	R53.3	0	23	0	2	0	10
WBGene00001208	egl-44	F28B12.2	0	1	0	8	0	23
WBGene00001209	egl-45	C27D11.1	5	44	0	18	1	0
WBGene00001210	egl-46	K11G9.4	0	0	0	15	0	0
WBGene00001211	egl-47	C50H2.2	0	0	0	0	0	0
WBGene00001214	ego-1	F26A3.3	45	216	0	23	7	0
WBGene00001215	ego-2	Y53H1C.2	30	58	0	26	7	0
WBGene00001223	ehn-3	ZK616.10	0	0	0	0	0	0
WBGene00001224	ehs-1	ZK1248.3	30	0	0	2	1	0
WBGene00001225	eif-3.B	Y54E2A.11	9	61	0	17	1	0
WBGene00001226	eif-3.C	T23D8.4	69	24	18	25	6	0
WBGene00001227	eif-3.D	R08D7.3	2	36	0	7	0	0
WBGene00001228	eif-3.E	B0511.10	120	28	0	12	4	1
WBGene00001229	eif-3.F	D2013.7	0	99	0	15	7	3
WBGene00001230	eif-3.G	F22B5.2	1	20	120	3	0	0
WBGene00001231	eif-3.H	C41D11.2	0	23	9	5	7	1
WBGene00001232	eif-3.I	Y74C10AR.1	7	23	11	3	3	24
WBGene00001233	eif-3.K	T16G1.11	3	39	0	37	0	0
WBGene00001234	eif-6	C47B2.5	0	5	0	16	0	0
WBGene00001235	elb-1	Y41C4A.10	45	31	0	3	4	6
WBGene00001236	elc-1	Y82E9BR.15	72	5	0	6	1	0
WBGene00001237	elc-2	W03H1.2	0	0	0	0	0	0
WBGene00001239	elo-1	F56H11.4	59	105	0	16	1	0
WBGene00001240	elo-2	F11E6.5	0	3	0	0	0	7
WBGene00001241	elo-3	D2024.3	0	6	0	3	1	0
WBGene00001242	elo-4	C40H1.4	0	26	0	0	0	0
WBGene00001243	elo-5	F41H10.7	0	0	0	0	0	0
WBGene00001244	elo-6	F41H10.8	0	7	0	1	0	0
WBGene00001245	elo-7	F56H11.3	0	0	0	0	0	0
WBGene00001246	elo-8	Y47D3A.30	0	0	0	0	0	0
WBGene00001247	elo-9	Y53F4B.2	0	0	0	2	0	0
WBGene00001248	elp-1	F38A6.2	0	0	0	0	0	0
WBGene00001249	elt-1	W09C2.1	0	8	0	16	0	0
WBGene00001250	elt-2	C33D3.1	0	0	0	0	0	0
WBGene00001251	elt-3	K02B9.4	0	3	0	0	0	0
WBGene00001252	elt-4	C39B10.6	0	0	0	0	0	0
WBGene00001253	elt-6	F52C12.5	0	0	0	1	0	0
WBGene00001258	emb-4	Y80D3A.2	48	21	15	23	2	0
WBGene00001259	emb-5	T04A8.14	0	41	0	24	2	5
WBGene00001262	emb-8	K10D2.6	0	168	0	30	5	0
WBGene00001263	emb-9	K04H4.1	0	1	0	11	0	0
WBGene00001281	emb-27	F10B5.6	0	8	0	9	3	6
WBGene00001284	emb-30	F54C8.3	78	109	0	8	0	0
WBGene00001303	emo-1	F32D8.6	0	30	0	19	25	0
WBGene00001309	emr-1	M01D7.6	44	15	0	3	4	1
WBGene00001310	end-1	F58E10.2	0	0	0	1	0	0
WBGene00001311	end-3	F58E10.5	0	0	0	0	0	0
WBGene00001320	ent-1	ZK809.4	75	49	87	17	8	0
WBGene00001324	eor-1	R11E3.6	33	37	0	23	3	0
WBGene00001325	eor-2	C44H4.7	111	70	0	12	0	8
WBGene00001328	epi-1	K08C7.3	10	6	0	73	1	11
WBGene00001329	epn-1	T04C10.2	242	311	31	27	20	19
WBGene00001330	eps-8	Y57G11C.24	0	6	0	20	0	0
WBGene00001331	erd-2	F09B9.3	1	12	17	6	3	0
WBGene00001332	eri-1	T07A9.5	0	3	0	8	0	19
WBGene00001333	erm-1	C01G8.5	63	12	1	15	12	0
WBGene00001334	ero-1	Y105E8B.8	0	39	5	14	3	0
WBGene00001335	erp-1	F35A5.8	0	39	0	2	7	4
WBGene00001336	qars-1	Y41E3.4	97	39	0	23	4	0
WBGene00001337	ears-1	ZC434.5	1	2	0	7	1	0
WBGene00001338	ears-2	T07A9.2	0	3	0	2	0	20
WBGene00001340	etr-1	T01D1.2	0	89	0	19	19	8
WBGene00001345	fos-1	F29G9.4	1	0	0	2	0	0
WBGene00001352	evl-14	H38K22.1	6	2	0	12	4	2
WBGene00001358	evl-20	F22B5.1	0	0	0	0	0	0
WBGene00001365	exc-4	Y105E8A.22	1	58	7	52	7	0
WBGene00001366	exc-5	C33D9.1	0	0	0	0	1	27
WBGene00001368	exc-7	F35H8.5	0	41	0	3	0	1
WBGene00001371	exl-1	F26H11.5	0	12	0	4	0	0
WBGene00001372	exo-3	R09B3.1	0	1	0	3	1	0
WBGene00001373	exp-1	H35N03.1	0	0	0	0	0	0
WBGene00001374	exp-2	F12F3.1	0	0	0	0	0	0
WBGene00001377	eya-1	C49A1.4	0	1	0	5	10	0
WBGene00001385	far-1	F02A9.2	0	0	0	20	1	11
WBGene00001386	far-2	F02A9.3	0	0	0	0	0	0
WBGene00001387	far-3	F15B9.1	0	0	0	0	0	0
WBGene00001388	far-4	F15B9.2	0	0	0	0	0	0
WBGene00001389	far-5	F15B9.3	0	0	0	0	0	0
WBGene00001390	far-6	W02A2.2	0	0	0	0	0	0
WBGene00001391	far-7	K01A2.2	0	0	0	0	0	0
WBGene00001392	far-8	K02F3.3	0	0	0	0	0	0
WBGene00001393	fat-1	Y67H2A.8	1	22	17	11	1	0
WBGene00001394	fat-2	W02A2.1	0	0	0	0	0	0
WBGene00001395	fat-3	W08D2.4	0	0	0	3	0	0
WBGene00001396	fat-4	T13F2.1	0	39	0	3	3	0
WBGene00001397	fat-5	W06D12.3	0	0	0	0	0	0
WBGene00001398	fat-6	VZK822L.1	0	0	0	0	0	0
WBGene00001399	fat-7	F10D2.9	0	0	0	0	0	0
WBGene00001400	fax-1	F56E3.4	0	0	0	0	0	0
WBGene00001401	fbf-1	H12I13.4	4	24	0	3	8	0
WBGene00001402	fbf-2	F21H12.5	0	8	0	1	2	0
WBGene00001403	fbl-1	F56H11.1	0	0	0	0	0	1
WBGene00001404	fbp-1	K07A3.1	38	83	0	9	4	0
WBGene00001405	fce-1	C04F12.10	93	4	12	4	2	0
WBGene00001406	fce-2	F48F5.5	0	42	0	8	4	0
WBGene00001410	feh-1	Y54F10AM.2	0	0	0	0	0	0
WBGene00001411	fem-1	F35D6.1	22	14	0	2	0	0
WBGene00001412	fem-2	T19C3.8	65	42	0	13	7	0
WBGene00001413	fem-3	C01F6.4	9	46	0	4	22	0
WBGene00001414	fer-1	F43G9.6	0	0	0	0	0	0
WBGene00001423	fib-1	T01C3.7	4	43	0	34	37	0
WBGene00001424	fis-1	F41G3.4	0	0	0	0	0	0
WBGene00001425	fis-2	F13B9.8	51	17	0	3	1	0
WBGene00001426	fkb-1	F36H1.1	0	6	0	16	0	0
WBGene00001427	fkb-2	Y18D10A.19	1	34	9	49	30	6
WBGene00001428	fkb-3	C05C8.3	0	5	0	2	0	11
WBGene00001429	fkb-4	ZC455.10	0	0	0	0	0	0
WBGene00001430	fkb-5	C50F2.6	24	3	0	4	2	1
WBGene00001431	fkb-6	F31D4.3	0	18	0	20	11	7
WBGene00001432	fkb-7	B0511.1	0	0	0	0	0	0
WBGene00001433	fkb-8	Y18D10A.25	0	0	0	0	0	0
WBGene00001434	fkh-2	T14G12.4	0	0	0	5	0	0
WBGene00001435	fkh-3	C29F7.4	0	19	0	0	0	0
WBGene00001436	fkh-4	C29F7.5	0	9	0	16	0	0
WBGene00001437	fkh-5	F26A1.2	0	1	0	0	0	0
WBGene00001438	fkh-6	B0286.5	0	0	0	0	0	0
WBGene00001439	fkh-7	F26D12.1	3	6	0	20	0	3
WBGene00001440	fkh-8	F40H3.4	0	0	0	0	0	0
WBGene00001441	fkh-9	K03C7.2	0	4	0	27	0	0
WBGene00001442	fkh-10	C25A1.2	0	0	0	0	0	0
WBGene00001443	fli-1	B0523.5	7	24	9	22	5	5
WBGene00001444	flp-1	F23B2.5	0	0	0	0	0	0
WBGene00001445	flp-2	W07E11.3	0	0	0	0	0	0
WBGene00001446	flp-3	W07E11.2	0	0	0	0	0	0
WBGene00001447	flp-4	C18D1.3	0	0	0	0	0	0
WBGene00001448	flp-5	C03G5.7	0	0	0	0	0	0
WBGene00001449	flp-6	F07D3.2	0	0	0	0	0	0
WBGene00001450	flp-7	F49E10.3	0	0	0	0	0	0
WBGene00001451	flp-8	F31F6.4	0	0	0	0	0	0
WBGene00001452	flp-9	C36H8.3	0	0	0	0	0	0
WBGene00001453	flp-10	T06C10.4	0	0	0	10	0	0
WBGene00001454	flp-11	K02G10.4	0	0	0	0	0	0
WBGene00001455	flp-12	C05E11.8	0	0	0	0	0	0
WBGene00001456	flp-13	F33D4.3	0	0	0	0	0	0
WBGene00001457	flp-14	Y37D8A.15	0	0	0	0	0	0
WBGene00001458	flp-15	ZK525.1	0	0	0	0	0	0
WBGene00001459	flp-16	F15D4.8	0	0	0	0	0	0
WBGene00001460	flp-17	C52D10.11	0	0	0	0	0	0
WBGene00001461	flp-18	Y48D7A.2	0	0	0	0	0	0
WBGene00001462	flp-19	M79.4	0	0	0	0	0	0
WBGene00001463	flp-20	E01H11.3	0	0	0	0	0	0
WBGene00001464	flp-21	C26F1.10	0	0	0	0	0	0
WBGene00001465	flr-1	F02D10.5	0	1	0	0	0	0
WBGene00001466	flr-2	F58H1.4	0	0	0	0	0	0
WBGene00001468	flr-4	F09B12.6	0	0	0	0	0	0
WBGene00001470	baz-2	ZK783.4	0	14	0	29	0	0
WBGene00001470	flt-1	ZK783.4	0	14	0	29	0	0
WBGene00001475	fmi-1	F15B9.7	0	1	0	15	1	5
WBGene00001476	fmo-1	K08C7.2	0	0	0	0	0	0
WBGene00001477	fmo-2	K08C7.5	0	0	0	0	0	0
WBGene00001478	fmo-3	Y39A1A.19	0	0	0	0	0	0
WBGene00001479	fmo-4	F53F4.5	0	1	0	2	1	0
WBGene00001480	fmo-5	H24K24.5	17	0	0	0	0	0
WBGene00001481	fog-1	Y54E10A.4	0	11	0	9	0	0
WBGene00001482	fog-2	Y113G7B.5	0	40	0	5	0	0
WBGene00001483	fog-3	C03C11.2	0	0	0	0	0	0
WBGene00001484	fox-1	T07D1.4	8	72	17	5	0	0
WBGene00001485	fre-1	Y113G7A.8	0	1	1	8	3	0
WBGene00001486	frh-1	F59G1.7	2	0	0	0	2	0
WBGene00001487	frk-1	T04B2.2	0	0	0	0	0	0
WBGene00001488	frm-1	ZK270.2	0	15	0	45	6	7
WBGene00001489	frm-2	T04C9.6	0	1	0	10	0	0
WBGene00001490	frm-3	H05G16.1	0	8	0	1	0	1
WBGene00001491	frm-4	C24A11.8	8	73	0	14	2	0
WBGene00001492	frm-5.1	Y38C1AB.8	0	0	0	13	0	0
WBGene00001493	frm-7	C51F7.1	29	31	1	15	1	0
WBGene00001494	frm-8	H09G03.2	0	0	0	1	0	0
WBGene00001495	frm-9	F31B12.3	0	0	0	0	0	0
WBGene00001496	frm-10	F25H9.5	0	7	0	3	0	0
WBGene00001497	fars-1	T08B2.9	71	59	0	20	3	1
WBGene00001498	fars-3	F22B5.9	0	42	0	15	0	5
WBGene00001499	fsn-1	C26E6.5	308	69	0	33	6	2
WBGene00001500	ftn-1	C54F6.14	0	0	0	0	0	0
WBGene00001501	ftn-2	D1037.3	0	28	0	12	0	0
WBGene00001502	ftt-2	F52D10.3	0	36	0	69	6	12
WBGene00001503	fum-1	H14A12.2	117	59	0	3	0	0
WBGene00001505	fut-1	K08F8.3	0	0	0	0	0	0
WBGene00001506	fut-2	EGAP9.2	0	0	0	0	0	0
WBGene00001507	fut-4	K12H6.3	0	0	0	0	0	0
WBGene00001508	fut-8	C10F3.6	0	0	0	0	0	11
WBGene00001509	fzo-1	ZK1248.14	9	12	0	14	3	0
WBGene00001510	fzr-1	ZK1307.6	176	199	1	39	16	5
WBGene00001511	fzy-1	ZK177.6	106	18	0	37	6	0
WBGene00001512	gab-1	ZC482.1	0	0	0	0	0	0
WBGene00001513	gad-1	T05H4.14	1	54	10	64	6	0
WBGene00001514	xnd-1	C05D2.5	175	42	0	62	3	0
WBGene00001515	gap-1	T24C12.2	0	0	0	0	0	0
WBGene00001516	gap-2	ZK899.8	14	52	0	9	10	0
WBGene00001517	gar-1	C15B12.5	0	0	0	0	0	0
WBGene00001518	gar-2	F47D12.1	0	0	0	1	0	0
WBGene00001519	gar-3	Y40H4A.1	0	0	0	0	0	0
WBGene00001520	gas-1	K09A9.5	30	0	0	0	0	15
WBGene00001522	gbh-1	D2089.5	0	0	0	0	0	0
WBGene00001523	gbh-2	M05D6.7	0	0	0	1	0	0
WBGene00001526	gck-1	T19A5.2	48	2	6	16	3	3
WBGene00001527	gcs-1	F37B12.2	16	24	0	10	8	0
WBGene00001528	gcy-1	AH6.1	0	0	0	0	0	0
WBGene00001529	gcy-2	R134.2	0	0	0	0	0	0
WBGene00001530	gcy-3	R134.1	0	0	0	0	0	0
WBGene00001531	gcy-4	ZK970.5	0	0	0	0	0	0
WBGene00001532	gcy-5	ZK970.6	0	0	0	0	0	0
WBGene00001533	gcy-6	B0024.6	0	0	0	0	0	0
WBGene00001534	gcy-7	F52E1.4	0	0	0	0	0	0
WBGene00001535	gcy-8	C49H3.1	0	0	0	0	0	0
WBGene00001536	gcy-9	ZK455.2	0	0	0	0	0	0
WBGene00001537	gcy-11	C30G4.3	0	0	0	1	0	0
WBGene00001538	gcy-12	F08B1.2	0	2	0	4	0	0
WBGene00001539	gcy-13	F23H12.6	0	0	0	0	0	0
WBGene00001540	gcy-14	ZC412.2	0	0	0	0	0	0
WBGene00001541	gcy-15	ZC239.7	0	0	0	0	0	0
WBGene00001542	gcy-17	W03F11.2	0	0	0	0	0	0
WBGene00001543	gcy-18	ZK896.8	0	0	0	0	0	3
WBGene00001544	gcy-19	C17F4.6	0	0	1	0	0	0
WBGene00001545	gcy-20	F21H7.9	0	0	0	0	0	0
WBGene00001546	gcy-21	F22E5.3	0	0	0	0	0	0
WBGene00001547	gcy-22	T03D8.5	0	0	0	0	0	0
WBGene00001548	gcy-23	T26C12.4	0	0	0	0	0	0
WBGene00001549	gcy-25	Y105C5B.2	0	0	0	0	0	0
WBGene00001550	gcy-27	C06A12.4	0	0	0	0	0	0
WBGene00001551	gcy-31	T07D1.1	0	0	0	0	0	0
WBGene00001552	gcy-32	C06B3.8	0	0	0	0	0	0
WBGene00001553	gcy-33	F57F5.2	0	0	0	0	0	0
WBGene00001554	gcy-34	M04G12.3	0	0	0	0	0	0
WBGene00001555	gcy-35	T04D3.4	0	0	0	0	0	0
WBGene00001556	gcy-36	C46E1.2	0	0	0	1	0	0
WBGene00001557	gcy-37	C54E4.3	0	0	0	0	0	0
WBGene00001558	gdi-1	Y57G11C.10	177	51	0	33	9	0
WBGene00001559	gei-1	F45H7.2	0	0	0	1	0	33
WBGene00001560	gei-3	T22H6.6	0	0	0	0	0	0
WBGene00001561	gei-4	W07B3.2	71	47	0	113	6	20
WBGene00001562	lin-66	B0513.1	46	115	0	85	11	8
WBGene00001563	gei-6	C05C8.4	0	33	0	11	1	0
WBGene00001564	icl-1	C05E4.9	2	18	0	20	1	18
WBGene00001565	gei-8	C14B9.6	0	57	0	22	2	4
WBGene00001566	acdh-13	C28C12.9	6	15	0	5	2	0
WBGene00001568	gei-11	F32H2.1	0	53	31	9	7	2
WBGene00001568	snpc-4	F32H2.1	0	53	31	9	7	2
WBGene00001569	gei-12	F52D2.4	1986	635	119	27	8	0
WBGene00001569	meg-3	F52D2.4	1986	635	119	27	8	0
WBGene00001570	gei-13	F58A4.11	76	4	0	13	3	19
WBGene00001571	gei-14	K01C8.5	54	149	0	7	4	1
WBGene00001572	gei-15	M03A8.4	0	0	0	1	1	0
WBGene00001574	gei-17	W10D5.3	222	139	0	35	5	4
WBGene00001575	gei-18	Y37A1B.15	0	0	0	0	0	0
WBGene00001577	gem-4	T12A7.1	0	5	0	30	0	0
WBGene00001578	ges-1	R12A1.4	0	0	0	0	0	0
WBGene00001579	gex-2	F56A11.1	135	69	0	6	2	1
WBGene00001580	gex-3	F28D1.10	238	97	0	21	6	1
WBGene00001581	gfi-1	F57F4.3	0	0	0	0	0	0
WBGene00001582	gfi-2	K02A11.1	126	85	0	21	15	2
WBGene00001583	gfi-3	M163.4	0	0	0	3	0	9
WBGene00001584	nrde-4	F45E4.10	0	1	0	3	1	0
WBGene00001585	gfl-1	M04B2.3	0	2	0	3	0	0
WBGene00001586	ggr-1	C09G5.1	0	0	0	0	0	0
WBGene00001587	ggr-2	C45B2.4	0	0	0	0	0	0
WBGene00001588	ggr-3	F09C12.1	0	0	0	0	0	0
WBGene00001589	gip-1	H04J21.3	0	1	0	7	1	0
WBGene00001590		C45G3.3	0	1	0	0	1	0
WBGene00001591	glc-1	F11A5.10	0	0	0	0	0	0
WBGene00001592	glc-2	F25F8.2	0	0	0	14	0	0
WBGene00001593	glc-3	ZC317.3	0	0	0	0	0	0
WBGene00001594	glc-4	C27H5.8	0	0	0	1	0	0
WBGene00001595	gld-1	T23G11.3	237	644	1	48	38	0
WBGene00001596	gld-2	ZC308.1	149	225	9	17	5	0
WBGene00001597	gld-3	T07F8.3	164	361	0	38	15	0
WBGene00001598	glh-1	T21G5.3	1	2	0	8	0	0
WBGene00001599	glh-2	C55B7.1	112	67	1	24	1	0
WBGene00001600	glh-3	B0414.6	9	12	7	2	2	0
WBGene00001601	glh-4	T12F5.3	0	33	0	5	3	0
WBGene00001602	gln-1	C45B2.5	0	1	0	2	1	0
WBGene00001603	gln-2	K03H1.1	0	0	0	0	0	0
WBGene00001604	gln-3	Y105C5B.28	27	2	0	5	0	4
WBGene00001605	gln-4	T25C8.3	0	0	0	0	0	0
WBGene00001606	gln-5	F26D10.10	0	173	0	33	9	0
WBGene00001607	gln-6	C28D4.3	343	232	0	31	1	0
WBGene00001608		R07B1.8	0	0	0	1	0	0
WBGene00001609	glp-1	F02A9.6	82	129	0	31	27	0
WBGene00001612	glr-1	C06E1.4	0	0	0	1	0	0
WBGene00001613	glr-2	B0280.12	0	0	0	0	0	0
WBGene00001614	glr-3	K10D3.1	0	0	0	0	0	0
WBGene00001615	glr-4	C06A8.9	0	1	0	0	0	0
WBGene00001616	glr-5	ZC196.7	0	0	0	0	0	0
WBGene00001617	glr-6	F41B4.4	0	0	0	0	0	0
WBGene00001618	glr-7	C43H6.9	0	0	0	0	0	0
WBGene00001619	glr-8	F22A3.3	0	0	0	0	0	0
WBGene00001620	glt-1	C12D12.2	0	0	0	0	0	0
WBGene00001621	glt-3	K08F4.4	0	0	0	0	0	0
WBGene00001622	glt-4	T22E5.2	0	0	0	0	0	0
WBGene00001623	glt-5	Y53C12A.2	0	0	0	2	0	0
WBGene00001624	glt-6	R05G6.6	0	0	0	0	0	0
WBGene00001625	glt-7	W03G1.1	0	0	0	0	0	0
WBGene00001626	gly-1	F44F4.6	0	0	0	0	0	0
WBGene00001627	gly-2	C55B7.2	0	0	0	1	0	0
WBGene00001628	gly-3	ZK688.8	16	122	0	7	2	15
WBGene00001629	gly-4	Y116F11B.12	0	60	0	9	1	0
WBGene00001630	gly-5	Y39E4B.12	96	78	0	16	3	17
WBGene00001631	gly-6	H38K22.5	0	0	0	12	0	0
WBGene00001632	gly-7	Y46H3A.6	79	53	1	15	12	0
WBGene00001633	gly-8	Y66A7A.6	0	0	0	1	0	0
WBGene00001635	gly-10	Y45F10D.3	6	205	0	14	4	0
WBGene00001636	gly-11	Y75B8A.9	0	0	0	0	0	0
WBGene00001637	gly-12	F48E3.1	0	0	0	0	0	4
WBGene00001638	gly-13	B0416.6	0	0	0	0	1	0
WBGene00001639	gly-14	M01F1.1	0	0	0	1	0	0
WBGene00001640	gly-15	C54C8.11	0	0	0	0	0	0
WBGene00001641	gly-16	T15D6.2	0	0	0	0	0	0
WBGene00001642	gly-17	T15D6.3	0	0	0	0	0	0
WBGene00001643	gly-18	F22D6.11	0	0	0	0	0	0
WBGene00001644	gly-19	F22D6.12	0	0	0	0	0	0
WBGene00001645	gly-20	C03E10.4	16	136	0	12	4	3
WBGene00001646	gna-1	B0024.12	0	0	0	0	1	0
WBGene00001647	gna-2	T23G11.2	79	97	0	6	12	0
WBGene00001648	goa-1	C26C6.2	93	32	15	68	16	17
WBGene00001649	gob-1	H13N06.3	0	54	0	6	1	19
WBGene00001650	gon-1	F25H8.3	1	0	0	3	0	0
WBGene00001651	gon-2	T01H8.5	0	2	0	12	1	10
WBGene00001653	gon-4	K04D7.5	137	87	0	17	3	0
WBGene00001660	gop-1	C34E10.3	0	19	0	10	1	0
WBGene00001661	gop-2	C34E10.2	0	5	0	4	0	0
WBGene00001662	gop-3	C34E10.1	0	17	0	16	4	0
WBGene00001663	gpa-1	T19C4.6	0	0	0	0	0	0
WBGene00001664	gpa-2	F38E1.5	0	0	0	0	0	0
WBGene00001665	gpa-3	E02C12.5	0	0	0	0	0	0
WBGene00001666	gpa-4	T07A9.7	0	0	0	1	0	0
WBGene00001667	gpa-5	F53B1.7	0	0	0	0	0	0
WBGene00001668	gpa-6	F48C11.1	0	0	0	0	0	0
WBGene00001669	gpa-7	R10H10.5	0	0	0	1	0	0
WBGene00001670	gpa-8	F56H9.3	0	0	0	0	0	0
WBGene00001671	gpa-9	F56H9.4	0	0	0	1	0	0
WBGene00001672	gpa-10	C55H1.2	0	0	0	0	0	0
WBGene00001673	gpa-11	C16A11.1	0	0	0	0	0	0
WBGene00001674	gpa-12	F18G5.3	0	0	0	0	0	0
WBGene00001675	gpa-13	F18E2.5	0	0	0	0	0	0
WBGene00001676	gpa-14	B0207.3	0	0	0	0	0	0
WBGene00001677	gpa-15	M04C7.1	0	1	0	0	0	0
WBGene00001678	gpa-16	Y95B8A.5	0	32	0	5	1	22
WBGene00001679	gpb-1	F13D12.7	126	72	85	134	25	6
WBGene00001680	gpb-2	F52A8.2	0	0	0	3	0	0
WBGene00001681	gpc-1	K02A4.2	0	0	0	0	0	0
WBGene00001682	gpc-2	F08B6.2	0	1	0	4	0	0
WBGene00001683	gpd-1	T09F3.3	2	28	0	1	0	0
WBGene00001684	gpd-2	K10B3.8	0	37	0	3	4	0
WBGene00001685	gpd-3	K10B3.7	0	0	0	1	0	0
WBGene00001686	gpd-4	F33H1.2	11	28	0	1	0	0
WBGene00001687	gpn-1	F59D12.4	0	0	0	1	0	0
WBGene00001688	gpr-1	F22B7.13	0	1	0	1	0	0
WBGene00001689	gpr-2	C38C10.4	0	0	0	1	0	0
WBGene00001690	grd-1	R08B4.1	0	0	0	0	0	0
WBGene00001691	grd-2	F46B3.5	0	0	0	0	0	0
WBGene00001692	grd-3	W05E7.1	0	0	0	0	0	0
WBGene00001693	grd-4	T01B10.1	0	0	0	0	0	0
WBGene00001694	grd-5	F41E6.2	0	0	0	0	0	0
WBGene00001695	grd-6	T18H9.1	0	0	0	0	0	0
WBGene00001696	grd-7	F46H5.6	0	0	0	0	0	0
WBGene00001697	grd-8	C37C3.4	0	0	0	0	0	0
WBGene00001698	grd-9	C04E6.6	0	0	0	0	0	0
WBGene00001699	grd-10	F09D12.1	0	0	0	0	0	0
WBGene00001700	grd-11	K02E2.2	0	1	0	1	0	0
WBGene00001701	grd-12	F02D8.2	0	0	0	0	0	1
WBGene00001702	grd-13	W05E7.3	0	0	0	2	0	0
WBGene00001703	grd-14	T01B10.2	0	0	0	0	0	0
WBGene00001704	grd-15	Y87G2A.15	0	0	0	0	0	0
WBGene00001705	grd-16	Y69A2AL.1	0	0	0	3	0	0
WBGene00001706	grd-17	Y102A5C.34	0	0	0	0	0	0
WBGene00001707	grh-1	Y48G8AR.1	0	0	0	0	0	0
WBGene00001708	grk-1	F19C6.1	57	52	1	21	7	0
WBGene00001709	grk-2	W02B3.2	0	33	0	1	0	0
WBGene00001710	grl-1	C24G6.7	0	0	0	1	0	0
WBGene00001711	grl-2	T16G1.8	0	0	0	0	0	0
WBGene00001712	grl-3	K03B8.7	0	0	0	0	0	0
WBGene00001713	grl-4	F42C5.7	0	5	0	17	0	0
WBGene00001714	grl-5	Y47D7A.5	0	0	0	0	0	0
WBGene00001715	grl-6	K10C2.5	0	0	0	0	0	0
WBGene00001716	grl-7	T02E9.2	0	0	0	0	0	13
WBGene00001717	grl-8	ZC487.5	0	0	0	0	0	0
WBGene00001718	grl-9	ZC487.4	0	0	0	0	0	0
WBGene00001719	grl-10	C26F1.5	0	0	0	3	0	0
WBGene00001720	grl-11	ZK512.9	0	0	0	0	0	0
WBGene00001721	grl-12	F28A12.2	0	0	0	0	0	0
WBGene00001722	grl-13	F32D1.4	0	0	0	0	0	0
WBGene00001723	grl-14	T03D8.4	0	0	0	0	0	0
WBGene00001724	grl-15	Y75B8A.20	0	0	0	0	0	0
WBGene00001725	grl-16	Y65B4BR.6	0	0	0	2	0	0
WBGene00001726	grl-17	C56A3.1	0	0	0	0	0	0
WBGene00001727	grl-18	T05C3.4	0	0	0	0	0	0
WBGene00001728	grl-19	R02D3.6	0	0	0	0	0	0
WBGene00001729	grl-20	C23H5.9	0	0	0	0	0	0
WBGene00001730	grl-21	ZC168.5	7	0	0	0	0	0
WBGene00001731	grl-22	W03A5.3	0	0	0	0	0	0
WBGene00001732	grl-23	E02A10.2	0	0	0	0	0	0
WBGene00001733	grl-24	F11E6.2	0	0	0	0	0	0
WBGene00001734	grl-25	ZK643.8	0	0	0	0	0	0
WBGene00001735	grl-26	K02D7.6	0	0	0	1	0	0
WBGene00001736	grl-27	F40C5.3	0	0	0	0	0	0
WBGene00001737	grl-28	T24A6.15	0	0	0	0	0	0
WBGene00001738	grl-29	T24A6.18	0	0	0	0	0	0
WBGene00001739	grl-30	T24A6.3	0	0	0	0	0	0
WBGene00001740	gro-1	ZC395.6	0	0	0	2	0	0
WBGene00001743	grp-1	K06H7.4	9	54	2	20	16	0
WBGene00001744	gars-1	T10F2.1	330	145	80	20	2	0
WBGene00001745	gsa-1	R06A10.2	0	1	0	9	0	16
WBGene00001746	gsk-3	Y18D10A.5	56	128	0	31	9	0
WBGene00001747	gsp-1	F29F11.6	130	136	0	41	21	1
WBGene00001748	gsp-2	F56C9.1	94	208	17	92	31	6
WBGene00001749	gst-1	R107.7	0	21	0	1	0	0
WBGene00001750	gst-2	K08F4.6	0	0	0	0	0	0
WBGene00001751	gst-3	K08F4.11	0	0	0	0	0	0
WBGene00001752	gst-4	K08F4.7	0	0	0	0	0	0
WBGene00001753	gst-5	R03D7.6	0	0	0	0	0	0
WBGene00001754	gst-6	F11G11.3	0	0	0	0	0	0
WBGene00001755	gst-7	F11G11.2	9	63	1	9	2	0
WBGene00001756	gst-8	F11G11.1	0	0	0	0	0	0
WBGene00001757	gst-9	R05F9.5	0	0	0	0	0	0
WBGene00001758	gst-10	Y45G12C.2	2	0	0	0	0	0
WBGene00001759	gst-11	R11G1.3	0	0	0	0	0	0
WBGene00001760	gst-12	F37B1.2	0	0	0	1	0	0
WBGene00001761	gst-13	T26C5.1	0	0	0	0	0	0
WBGene00001762	gst-14	F37B1.3	0	0	0	0	0	0
WBGene00001763	gst-15	F37B1.4	0	0	0	0	0	0
WBGene00001764	gst-16	F37B1.5	0	0	0	0	0	0
WBGene00001765	gst-17	F37B1.6	0	0	0	0	0	0
WBGene00001766	gst-18	F37B1.7	0	0	0	0	0	0
WBGene00001767	gst-19	F37B1.8	0	0	0	0	0	0
WBGene00001768	gst-20	Y48E1B.10	0	10	0	3	0	0
WBGene00001769	gst-21	ZK697.6	0	0	0	0	0	0
WBGene00001770	gst-22	F21H7.1	0	0	0	0	0	0
WBGene00001771	gst-23	T28A11.11	0	0	0	0	0	0
WBGene00001772	gst-24	F37B1.1	0	0	0	0	0	0
WBGene00001773	gst-25	F37F2.3	0	0	0	0	0	0
WBGene00001774	gst-26	Y53F4B.29	0	0	0	0	0	0
WBGene00001775	gst-27	Y53F4B.30	0	0	0	0	0	0
WBGene00001776	gst-28	Y53F4B.31	0	0	0	0	0	0
WBGene00001777	gst-29	Y53F4B.32	0	0	0	0	0	0
WBGene00001778	gst-30	ZK546.11	0	0	0	0	0	0
WBGene00001779	gst-31	Y53F4B.35	0	0	0	0	0	0
WBGene00001780	gst-32	Y53F4B.37	0	0	0	0	0	0
WBGene00001781	gst-33	C02A12.1	0	0	0	0	0	0
WBGene00001782	gst-34	Y1H11.1	0	0	0	1	0	0
WBGene00001783	gst-35	Y1H11.2	0	0	0	0	0	0
WBGene00001784	gst-36	R07B1.4	0	0	0	0	0	0
WBGene00001785	gst-37	Y32G9A.1	0	0	0	0	0	0
WBGene00001786	gst-38	F35E8.8	0	0	0	0	0	0
WBGene00001787	gst-39	Y53F4B.33	0	0	0	0	0	0
WBGene00001788	gst-40	F56B3.10	0	0	0	0	0	0
WBGene00001789	gst-41	R13D7.7	0	0	0	0	0	0
WBGene00001790	gst-42	D1053.1	0	0	0	1	0	0
WBGene00001791	gst-43	Y71F9AL.5	0	0	0	0	0	0
WBGene00001792	gst-44	F13A7.10	0	0	0	0	0	0
WBGene00001793	gsy-1	Y46G5A.31	37	152	0	19	18	2
WBGene00001794	gta-1	K04D7.3	0	0	0	4	1	0
WBGene00001795	gtl-1	C05C12.3	0	0	0	0	0	0
WBGene00001796	gtl-2	F54D1.5	0	0	0	0	0	0
WBGene00001803	lite-1	C14F11.3	0	0	0	0	0	0
WBGene00001804	gur-3	ZC504.5	0	0	0	0	0	0
WBGene00001805	gur-4	K09E4.5	0	0	0	0	0	0
WBGene00001806	gur-5	ZK622.2	0	0	0	0	0	0
WBGene00001808	gut-2	T10G3.6	0	0	0	3	3	0
WBGene00001811	haf-1	C30H6.6	0	0	0	2	0	0
WBGene00001812	haf-2	F43E2.4	58	58	0	11	0	0
WBGene00001813	haf-3	F57A10.3	182	85	9	21	2	1
WBGene00001814	haf-4	W04C9.1	0	0	0	5	0	0
WBGene00001815	hmt-1	W09D6.6	2	37	0	4	2	0
WBGene00001816	haf-6	Y48G8AL.11	0	10	0	6	0	0
WBGene00001817	haf-7	Y50E8A.16	0	0	0	1	0	0
WBGene00001818	haf-8	Y57G11C.1	0	0	0	0	0	0
WBGene00001819	haf-9	ZK484.2	0	0	0	0	0	0
WBGene00001820	ham-1	F53B2.6	38	10	0	11	0	0
WBGene00001821	ham-2	C07A12.1	0	1	0	5	0	0
WBGene00001823	hap-1	ZC395.7	0	1	0	1	0	0
WBGene00001824	hbl-1	F13D11.2	0	56	0	80	4	4
WBGene00001827	hcf-1	C46A5.9	40	31	0	32	2	0
WBGene00001828	hch-1	F40E10.1	0	0	0	11	0	0
WBGene00001829	hcp-1	ZK1055.1	5	9	0	22	0	0
WBGene00001830	hcp-2	T06E4.1	0	1	0	19	12	0
WBGene00001831	hcp-3	F58A4.3	0	15	0	4	3	13
WBGene00001832	hcp-4	T03F1.9	0	6	0	16	0	0
WBGene00001833	hcp-6	Y110A7A.1	144	8	0	21	1	0
WBGene00001834	hda-1	C53A5.3	17	212	0	30	7	0
WBGene00001835	hda-2	C08B11.2	53	14	0	8	2	0
WBGene00001836	hda-3	R06C1.1	0	12	0	9	11	0
WBGene00001837	hda-4	C10E2.3	0	10	0	4	0	0
WBGene00001838	hda-10	Y51H1A.5	0	24	0	3	1	0
WBGene00001839	hdl-1	ZK829.2	0	0	0	0	0	0
WBGene00001840	hel-1	C26D10.2	1	77	0	63	7	7
WBGene00001841	hen-1	C36B7.7	0	0	0	0	0	0
WBGene00001842	her-1	ZK287.8	0	0	0	1	0	0
WBGene00001843	hgo-1	W06D4.1	0	0	0	11	0	0
WBGene00001844	hid-1	K02E10.2	0	1	0	16	0	6
WBGene00001851	hif-1	F38A6.3	22	22	0	29	1	0
WBGene00001852	hil-1	C30G7.1	1	0	0	0	0	0
WBGene00001853	hil-2	Y73B6BL.9	187	6	0	41	0	0
WBGene00001854	hil-3	F22F1.1	54	32	0	30	0	0
WBGene00001855	hil-4	C18G1.5	157	228	16	24	15	14
WBGene00001856	hil-5	B0414.3	52	52	0	15	2	0
WBGene00001857	hil-6	F59A7.4	1	0	0	0	0	0
WBGene00001858	hil-7	C01B10.5	232	9	0	17	2	17
WBGene00001859	hil-8	T05E8.2	0	0	0	2	0	0
WBGene00001860	him-1	F28B3.7	0	132	0	21	4	0
WBGene00001862	him-3	ZK381.1	2	72	15	4	9	0
WBGene00001863	him-4	F15G9.4	0	0	0	17	0	0
WBGene00001864	him-5	D1086.4	0	0	0	1	3	0
WBGene00001865	him-6	T04A11.6	7	19	0	7	2	0
WBGene00001867	him-8	T07G12.12	56	47	0	9	4	0
WBGene00001869	him-10	R12B2.4	0	45	6	5	3	1
WBGene00001872	him-14	ZK1127.11	0	61	0	3	0	0
WBGene00001874	him-17	T09E8.2	72	4	16	5	1	0
WBGene00001875	his-1	T10C6.14	6	45	0	12	6	18
WBGene00001876	his-2	T10C6.13	0	23	0	9	0	0
WBGene00001877	his-3	T10C6.12	98	56	0	28	0	0
WBGene00001878	his-4	T10C6.11	2	26	0	59	0	0
WBGene00001879	his-5	F45F2.3	0	18	0	3	0	2
WBGene00001880	his-6	F45F2.13	75	5	0	7	0	0
WBGene00001881	his-7	F45F2.4	0	2	0	6	0	0
WBGene00001882	his-8	F45F2.12	5	16	0	9	0	0
WBGene00001883	his-9	ZK131.3	0	0	0	0	0	0
WBGene00001884	his-10	ZK131.4	0	0	0	0	0	0
WBGene00001885	his-11	ZK131.5	0	0	0	0	0	0
WBGene00001886	his-12	ZK131.6	6	0	0	0	0	11
WBGene00001887	his-13	ZK131.7	0	0	0	0	0	0
WBGene00001888	his-14	ZK131.8	0	0	0	0	0	0
WBGene00001889	his-15	ZK131.9	0	0	0	0	0	0
WBGene00001890	his-16	ZK131.10	0	0	0	0	0	0
WBGene00001891	his-17	K06C4.5	0	1	0	3	0	0
WBGene00001892	his-18	K06C4.10	0	1	0	27	0	0
WBGene00001893	his-19	K06C4.11	0	0	0	0	0	0
WBGene00001894	his-20	K06C4.4	0	0	0	0	0	0
WBGene00001895	his-21	K06C4.3	0	0	0	0	0	0
WBGene00001896	his-22	K06C4.12	0	0	0	0	0	0
WBGene00001898	his-24	M163.3	7	72	2	185	0	5
WBGene00001899	his-25	ZK131.2	1	0	0	1	0	0
WBGene00001900	his-26	ZK131.1	0	0	0	0	0	0
WBGene00001901	his-27	K06C4.13	0	0	0	0	0	0
WBGene00001902	his-28	K06C4.2	0	0	0	0	0	0
WBGene00001903	his-29	F35H10.11	9	1	0	0	0	0
WBGene00001904	his-30	F35H10.1	0	0	0	0	0	0
WBGene00001905	his-31	F17E9.12	0	62	0	18	0	0
WBGene00001906	his-32	F17E9.10	5	52	0	79	0	0
WBGene00001907	his-33	F17E9.13	0	0	0	0	0	0
WBGene00001908	his-34	F17E9.9	2	0	0	1	0	0
WBGene00001909	his-35	C50F4.13	0	1	0	2	0	0
WBGene00001910		C50F4.6	0	1	0	5	1	0
WBGene00001911	his-37	C50F4.7	33	5	0	3	0	0
WBGene00001912	his-38	K03A1.6	3	5	0	12	0	0
WBGene00001913	his-39	F45F2.2	0	1	0	0	0	0
WBGene00001914	his-40	K03A1.1	69	87	1	17	0	2
WBGene00001915	his-41	C50F4.5	0	4	0	2	0	0
WBGene00001916	his-42	F08G2.3	2	1	0	0	0	0
WBGene00001917	his-43	F08G2.2	0	1	0	6	0	0
WBGene00001918	his-44	F08G2.1	2	3	0	1	0	0
WBGene00001919	his-45	B0035.10	0	3	0	0	0	0
WBGene00001920	his-46	B0035.9	0	0	0	1	0	1
WBGene00001921	his-47	B0035.7	2	2	0	2	0	0
WBGene00001922	his-48	B0035.8	106	51	0	17	0	1
WBGene00001923	his-49	F07B7.5	0	0	0	0	0	0
WBGene00001924	his-50	F07B7.9	0	0	0	0	0	0
WBGene00001925	his-51	F07B7.10	0	0	0	0	0	0
WBGene00001926	his-52	F07B7.4	0	0	0	0	0	0
WBGene00001927	his-53	F07B7.3	0	0	0	0	0	0
WBGene00001928	his-54	F07B7.11	0	0	0	0	0	0
WBGene00001929	his-55	F54E12.1	1	5	0	0	0	0
WBGene00001930	his-56	F54E12.3	1	1	0	0	0	0
WBGene00001931	his-57	F54E12.5	0	0	0	0	0	0
WBGene00001932	his-58	F54E12.4	0	0	0	0	0	0
WBGene00001933	his-59	F55G1.2	135	165	0	94	0	6
WBGene00001934	his-60	F55G1.11	106	23	2	39	0	1
WBGene00001935	his-61	F55G1.10	84	38	1	31	2	0
WBGene00001936	his-62	F55G1.3	10	34	0	66	1	0
WBGene00001937	his-63	F22B3.2	0	26	0	16	1	1
WBGene00001938	his-64	F22B3.1	1	18	0	19	1	2
WBGene00001939	his-65	H02I12.7	0	0	0	0	0	0
WBGene00001940	his-66	H02I12.6	0	0	0	1	1	0
WBGene00001941	his-67	T23D8.5	12	16	0	25	1	0
WBGene00001942	his-68	T23D8.6	78	8	0	20	0	0
WBGene00001943	his-69	E03A3.3	2	0	0	2	0	1
WBGene00001944	his-70	E03A3.4	0	0	0	1	0	0
WBGene00001945	his-71	F45E1.6	2	5	0	5	1	1
WBGene00001946	his-72	Y49E10.6	3	112	115	42	14	3
WBGene00001947	his-73	W09H1.2	10	10	0	1	0	0
WBGene00001948	hlh-1	B0304.1	0	0	0	2	0	0
WBGene00001949	hlh-2	M05B5.5	44	16	0	9	6	0
WBGene00001950	hlh-3	T24B8.6	0	5	0	4	0	1
WBGene00001951	hlh-4	T05G5.2	0	0	0	1	0	0
WBGene00001952	hlh-6	T15H9.3	0	0	0	1	0	0
WBGene00001953	hlh-8	C02B8.4	0	0	0	0	0	0
WBGene00001954	hlh-10	ZK682.4	0	0	0	0	0	0
WBGene00001955	hlh-11	F58A4.7	1	1	0	0	0	0
WBGene00001956	hlh-12	C28C12.8	0	0	0	0	0	0
WBGene00001957	hlh-13	F48D6.3	0	0	0	0	0	0
WBGene00001958	hlh-14	C18A3.8	33	0	0	6	0	0
WBGene00001959	hlh-15	C43H6.8	0	0	0	0	0	0
WBGene00001960	hlh-16	DY3.3	0	0	0	0	0	0
WBGene00001961	hlh-17	F38C2.2	0	0	0	0	0	0
WBGene00001962	hlh-19	F57C12.3	0	0	0	0	0	0
WBGene00001963	btb-1	F40G9.4	0	0	0	1	0	0
WBGene00001964	hlh-25	C17C3.7	17	0	0	0	0	0
WBGene00001965	hlh-26	C17C3.8	0	0	0	0	0	0
WBGene00001966	hlh-27	C17C3.10	20	0	0	0	0	0
WBGene00001967	hlh-28	F31A3.2	0	0	0	0	0	0
WBGene00001968	hlh-29	F31A3.4	0	4	0	0	0	0
WBGene00001971	hmg-1.1	Y48B6A.14	140	127	57	263	42	12
WBGene00001972	hmg-1.2	F47D12.4	4	31	8	17	5	0
WBGene00001973	hmg-3	C32F10.5	18	77	0	4	1	0
WBGene00001974	hmg-4	T20B12.8	1	21	0	33	16	2
WBGene00001975	hmg-5	F45E4.9	0	14	0	2	2	0
WBGene00001976	hmg-11	T05A7.4	80	28	0	10	0	0
WBGene00001977	hmg-12	Y17G7A.1	58	130	0	18	4	1
WBGene00001978	hmp-1	R13H4.4	214	153	0	33	4	0
WBGene00001979	hmp-2	K05C4.6	0	83	0	32	6	0
WBGene00001980	hmr-1	W02B9.1	71	79	0	53	2	0
WBGene00001981	hnd-1	C44C10.8	0	5	0	0	0	0
WBGene00001983	hoe-1	E04A4.4	0	22	0	18	0	0
WBGene00001984	hog-1	W06B11.4	0	0	0	0	0	0
WBGene00001985	hop-1	C18E3.8	0	11	0	4	3	0
WBGene00001986	hot-1	F43D2.4	0	0	0	0	0	0
WBGene00001987	hot-2	Y39B6A.48	0	0	0	0	0	0
WBGene00001988	hot-3	W02B8.5	0	0	0	0	0	0
WBGene00001989	hot-4	T12A2.16	0	0	0	0	0	0
WBGene00001990	hot-5	K07A12.6	0	0	0	0	0	0
WBGene00001991	hot-6	C13G3.2	0	0	0	0	0	0
WBGene00001992	hot-7	Y48B6A.9	0	0	0	0	0	0
WBGene00001993	hpd-1	T21C12.2	20	0	0	0	0	1
WBGene00001994	hpk-1	F20B6.8	197	307	1	87	11	6
WBGene00001995	hpl-1	K08H2.6	1	5	6	1	2	0
WBGene00001996	hpl-2	K01G5.2	41	26	0	6	0	0
WBGene00001997	hpr-9	Y39A1A.23	0	6	0	1	3	0
WBGene00001998	hpr-17	F32A11.2	88	138	41	35	3	0
WBGene00001999	hrp-1	F42A6.7	24	51	0	59	9	3
WBGene00002000	hrp-2	F58D5.1	66	65	0	55	1	1
WBGene00002001	hars-1	T11G6.1	3	7	0	6	3	0
WBGene00002002	hsb-1	K08E7.2	0	53	0	8	8	2
WBGene00002003	hse-5	B0285.5	21	132	0	11	6	2
WBGene00002004	hsf-1	Y53C10A.12	36	134	0	24	18	9
WBGene00002005	hsp-1	F26D10.3	385	495	17	82	7	19
WBGene00002006	hsp-2	K09C4.3	1	1	0	0	0	0
WBGene00002007	hsp-3	C15H9.6	59	87	1	41	11	11
WBGene00002008	hsp-4	F43E2.8	190	95	2	13	4	0
WBGene00002010	hsp-6	C37H5.8	358	260	1	35	36	0
WBGene00002011	hsp-12.2	C14B9.1	0	0	0	3	0	0
WBGene00002012	hsp-12.3	F38E11.1	0	0	0	0	0	0
WBGene00002013	hsp-12.6	F38E11.2	0	0	0	0	0	0
WBGene00002015	hsp-16.1	T27E4.8	0	0	0	0	0	0
WBGene00002016	hsp-16.2	Y46H3A.3	0	0	0	0	0	0
WBGene00002017	hsp-16.11	T27E4.2	0	0	0	0	0	0
WBGene00002018	hsp-16.41	Y46H3A.2	97	0	0	0	1	14
WBGene00002019	hsp-16.48	T27E4.3	0	0	0	0	0	0
WBGene00002020	hsp-16.49	T27E4.9	0	0	0	0	0	0
WBGene00002021	hsp-17	F52E1.7	0	0	0	0	0	0
WBGene00002023	hsp-25	C09B8.6	0	1	0	1	0	0
WBGene00002024	hsp-43	C14F11.5	0	0	0	0	0	0
WBGene00002025	hsp-60	Y22D7AL.5	28	214	1	57	22	0
WBGene00002026	hsp-70	C12C8.1	0	0	0	0	0	0
WBGene00002027	hsr-9	T05F1.6	24	90	0	37	20	26
WBGene00002028	hst-1	F08B4.6	2	84	0	9	5	0
WBGene00002029	hst-2	C34F6.4	0	3	0	2	0	0
WBGene00002030	hst-3.1	F40H3.5	0	0	0	0	0	0
WBGene00002031	hst-6	Y34B4A.3	0	20	0	1	0	0
WBGene00002032	htp-1	F41H10.10	88	35	0	5	3	0
WBGene00002033	htp-2	Y73B6BL.2	0	25	0	2	2	0
WBGene00002034	htp-3	F57C9.5	14	33	0	6	0	0
WBGene00002035	hum-1	F29D10.4	6	96	0	19	1	0
WBGene00002036	hum-2	F36D4.3	37	267	0	45	2	0
WBGene00002037	hum-4	F46C3.3	0	0	0	11	1	3
WBGene00002038	hum-5	T02C12.1	0	0	0	7	0	0
WBGene00002039	hum-6	T10H10.1	0	2	0	3	0	1
WBGene00002040	hum-7	F56A6.2	0	27	0	21	0	0
WBGene00002041	hum-8	Y66H1A.6	0	0	0	0	0	0
WBGene00002042	hus-1	H26D21.1	0	0	0	1	0	0
WBGene00002043	hyl-1	C09G4.1	8	139	45	15	19	1
WBGene00002044	hyl-2	K02G10.6	0	35	0	4	2	0
WBGene00002045	icd-1	C56C10.8	277	108	4	20	1	6
WBGene00002046	icln-1	C01F6.8	48	5	0	1	0	2
WBGene00002047	icp-1	Y39G10AR.13	0	16	0	10	0	0
WBGene00002048	ida-1	B0244.2	0	0	0	4	1	4
WBGene00002050	ifa-1	F38B2.1	0	0	0	0	0	0
WBGene00002051	ifa-3	F52E10.5	0	5	0	4	0	0
WBGene00002052	ifa-4	K05B2.3	0	0	0	0	0	0
WBGene00002053	ifb-1	F10C1.2	0	0	0	7	0	0
WBGene00002054	ifb-2	F10C1.7	0	0	0	3	0	0
WBGene00002055	ifc-1	F37B4.2	0	0	0	0	0	0
WBGene00002056	ifc-2	M6.1	0	0	0	0	0	0
WBGene00002057	ifd-1	R04E5.10	0	0	0	0	0	0
WBGene00002058	ifd-2	F25E2.4	0	0	0	0	0	0
WBGene00002059	ife-1	F53A2.6	0	0	0	5	0	0
WBGene00002060	ife-2	R04A9.4	0	4	0	1	1	0
WBGene00002061	ife-3	B0348.6	1	131	0	16	2	0
WBGene00002062	ife-4	C05D9.5	0	4	0	9	1	0
WBGene00002063	ife-5	Y57A10A.30	0	0	0	12	0	0
WBGene00002064	iff-1	T05G5.10	121	14	0	3	0	0
WBGene00002065	iff-2	F54C9.1	0	7	0	28	0	0
WBGene00002066	ifg-1	M110.4	222	469	1	73	25	5
WBGene00002067	ifp-1	C43C3.1	0	1	0	4	1	0
WBGene00002068	ify-1	C27A2.3	0	53	0	11	4	0
WBGene00002069	ikb-1	C04F12.3	0	0	0	0	0	0
WBGene00002070	ile-1	K07A1.8	17	205	0	30	5	0
WBGene00002071	ile-2	T04G9.3	0	21	0	2	0	0
WBGene00002072	ima-1	T19B10.7	9	66	0	4	8	1
WBGene00002073	ima-2	F26B1.3	236	326	0	22	29	1
WBGene00002074	ima-3	F32E10.4	133	133	3	58	16	1
WBGene00002075	imb-1	F28B3.8	123	86	13	20	13	1
WBGene00002076	imb-2	R06A4.4	58	83	19	44	9	3
WBGene00002077	imb-3	C53D5.6	0	182	0	40	0	3
WBGene00002078	xpo-1	ZK742.1	72	235	14	120	23	6
WBGene00002079	xpo-2	Y48G1A.5	43	118	0	55	1	8
WBGene00002080	xpo-3	C49H3.10	7	112	32	19	7	0
WBGene00002081	ina-1	F54G8.3	0	7	0	7	0	0
WBGene00002083	inf-1	F57B9.6	244	429	4	66	103	4
WBGene00002084	ins-1	F13B12.5	0	0	0	1	0	0
WBGene00002085	ins-2	ZK75.2	0	0	0	0	0	19
WBGene00002086	ins-3	ZK75.3	0	0	0	0	0	0
WBGene00002087	ins-4	ZK75.1	0	0	0	0	0	0
WBGene00002088	ins-5	ZK84.3	0	4	0	0	0	0
WBGene00002089	ins-6	ZK84.6	0	0	0	0	0	0
WBGene00002090	ins-7	ZK1251.2	0	0	0	0	0	0
WBGene00002091	ins-8	ZK1251.11	0	0	0	0	0	0
WBGene00002092	ins-9	C06E2.8	0	0	0	0	0	0
WBGene00002093	ins-10	T08G5.12	0	0	0	0	0	0
WBGene00002094	ins-11	C17C3.4	0	0	0	0	0	0
WBGene00002095	ins-12	C17C3.19	0	0	0	0	0	0
WBGene00002096	ins-13	C17C3.18	0	0	0	0	0	0
WBGene00002097	ins-14	F41G3.16	0	0	0	0	0	0
WBGene00002098	ins-15	F41G3.17	0	0	0	0	0	0
WBGene00002099	ins-16	Y39A3A.5	0	0	0	0	0	0
WBGene00002100	ins-17	F56F3.6	0	0	0	0	0	13
WBGene00002101	ins-18	T28B8.2	0	0	0	0	0	0
WBGene00002102	ins-19	T10D4.13	0	0	0	0	0	0
WBGene00002103	ins-20	ZK84.7	0	0	0	0	0	0
WBGene00002104	ins-21	M04D8.1	0	0	0	0	0	0
WBGene00002105	ins-22	M04D8.2	0	0	0	0	0	0
WBGene00002106	ins-23	M04D8.3	0	0	0	0	0	0
WBGene00002107	ins-24	ZC334.3	0	0	0	0	0	0
WBGene00002108	ins-25	ZC334.8	0	0	0	0	0	0
WBGene00002109	ins-26	ZC334.1	0	0	0	0	0	0
WBGene00002110	ins-27	ZC334.11	0	0	0	0	0	0
WBGene00002111	ins-28	ZC334.9	0	0	0	0	0	0
WBGene00002112	ins-29	ZC334.10	0	0	0	0	0	0
WBGene00002113	ins-30	ZC334.2	0	0	0	0	0	0
WBGene00002114	ins-31	T10D4.4	0	0	0	0	0	0
WBGene00002115	ins-32	Y8A9A.6	0	0	0	0	0	0
WBGene00002116	ins-33	W09C5.4	0	0	0	0	0	0
WBGene00002117	ins-34	F52B11.6	0	8	0	0	0	0
WBGene00002118	ins-35	K02E2.4	0	0	0	0	0	0
WBGene00002119	ins-36	Y53H1A.4	0	0	0	0	0	0
WBGene00002120	ins-37	F08G2.6	0	0	0	0	0	0
WBGene00002121	ins-38	C17C3.20	0	0	0	0	0	0
WBGene00002123	inx-1	C16E9.4	0	26	0	7	0	0
WBGene00002124	inx-2	F08G12.10	0	21	0	34	0	0
WBGene00002125	inx-3	F22F4.2	59	34	0	40	0	39
WBGene00002127	inx-5	R09F10.4	0	0	0	3	0	10
WBGene00002128	inx-6	C36H8.2	0	0	0	0	0	0
WBGene00002129	inx-7	K02B2.4	53	18	0	6	2	0
WBGene00002130	inx-8	ZK792.2	0	0	0	0	0	0
WBGene00002131	inx-9	ZK792.3	0	0	0	0	0	0
WBGene00002132	inx-10	T18H9.5	0	0	0	0	0	0
WBGene00002133	inx-11	W04D2.3	0	1	0	0	0	0
WBGene00002134	inx-12	ZK770.3	0	0	0	21	0	0
WBGene00002135	inx-13	Y8G1A.2	0	2	0	6	0	0
WBGene00002136	inx-14	F07A5.1	205	129	2	10	9	3
WBGene00002137	inx-15	R12E2.9	0	0	0	1	0	0
WBGene00002138	inx-16	R12E2.5	0	0	0	1	0	0
WBGene00002139	inx-17	R12E2.4	0	0	0	0	0	0
WBGene00002140	inx-18	C18H7.2	0	0	0	0	62	0
WBGene00002141	inx-19	T16H5.1	0	0	0	0	0	20
WBGene00002142	inx-20	T23H4.1	0	0	0	0	0	0
WBGene00002143	inx-21	Y47G6A.1	1	16	18	5	5	16
WBGene00002144	inx-22	Y47G6A.2	41	80	0	22	1	3
WBGene00002146	ipp-5	C09B8.1	0	0	0	0	0	15
WBGene00002147	ire-1	C41C4.4	6	40	13	15	3	0
WBGene00002148	gon-14	F44C4.4	368	404	1	46	14	2
WBGene00002149	irk-1	R03E9.4	0	0	0	0	0	0
WBGene00002150	irk-2	M02A10.2	0	0	0	0	0	7
WBGene00002151	irk-3	K04G11.5	0	0	0	0	0	0
WBGene00002152	iars-1	R11A8.6	13	41	0	24	5	0
WBGene00002153	iars-2	C25A1.7	15	2	0	7	2	0
WBGene00002162	isp-1	F42G8.12	83	45	0	21	6	6
WBGene00002163	ist-1	C54D1.3	0	0	0	1	0	0
WBGene00002169	isw-1	F37A4.8	113	79	0	26	7	2
WBGene00002173	itr-1	F33D4.2	0	0	0	16	0	0
WBGene00002174	itx-1	W03D8.6	0	0	0	1	0	0
WBGene00002175	jac-1	Y105C5B.21	0	3	0	20	0	15
WBGene00002176	jip-1	F56D12.4	0	0	0	1	0	0
WBGene00002177	jkk-1	F35C8.3	0	0	0	0	0	0
WBGene00002178	jnk-1	B0478.1	0	0	0	3	0	0
WBGene00002179	jph-1	T22C1.7	0	0	0	2	0	0
WBGene00002180	jtr-1	Y77E11A.4	0	10	3	3	7	0
WBGene00002181	kal-1	K03D10.1	0	2	0	6	0	0
WBGene00002182	kap-1	F08F8.3	0	0	0	0	0	0
WBGene00002183	kat-1	T02G5.8	62	44	0	5	3	0
WBGene00002184	kel-1	C47D12.7	0	0	0	9	0	0
WBGene00002185	kel-3	T27E9.4	0	7	0	2	0	0
WBGene00002186	kel-10	T16H12.6	0	0	0	0	0	0
WBGene00002187	kgb-1	T07A9.3	0	4	0	1	1	0
WBGene00002188	kgb-2	ZC416.4	0	0	0	0	0	0
WBGene00002189	kin-1	ZK909.2	0	22	0	1	0	0
WBGene00002190	kin-2	R07E4.6	60	36	137	12	3	2
WBGene00002191	kin-3	B0205.7	51	41	0	38	12	21
WBGene00002192	kin-4	C10C6.1	384	135	1	53	7	0
WBGene00002193	kin-5	T13H10.1	0	0	0	0	0	0
WBGene00002194	kin-6	ZK20.2	0	0	0	0	0	0
WBGene00002195	kin-9	F08F1.1	0	0	0	0	0	0
WBGene00002196	kin-10	T01G9.6	0	12	0	18	0	2
WBGene00002198	kin-14	F22D6.1	0	0	0	0	0	0
WBGene00002199	kin-15	M176.6	0	0	0	0	0	0
WBGene00002200	kin-16	M176.7	0	0	0	0	0	0
WBGene00002201	kin-18	T17E9.1	80	104	19	27	14	2
WBGene00002202	kin-19	C03C10.1	258	82	0	66	51	34
WBGene00002203	kin-20	F46F2.2	108	15	0	31	7	0
WBGene00002204	kin-21	W08D2.8	0	0	0	0	0	0
WBGene00002205	kin-23	W04G5.6	0	0	0	0	0	0
WBGene00002206	kin-24	K07F5.4	0	0	0	0	0	0
WBGene00002207	sid-3	B0302.1	5	35	0	3	1	0
WBGene00002208	kin-26	T06C10.6	0	0	0	0	0	0
WBGene00002210	kin-29	F58H12.1	0	2	0	4	2	0
WBGene00002211	kin-30	M01B2.1	0	0	0	0	0	0
WBGene00002212	kin-31	B0523.1	0	0	0	0	0	0
WBGene00002213	kin-32	C30F8.4	8	2	0	4	0	0
WBGene00002214	klc-1	M7.2	98	84	24	13	13	0
WBGene00002215	klc-2	C18C4.10	0	59	0	5	1	0
WBGene00002216	klp-3	T09A5.2	0	0	0	0	0	2
WBGene00002217	klp-4	F56E3.3	0	0	0	3	0	0
WBGene00002218	klp-6	R144.1	0	0	0	0	0	0
WBGene00002219	klp-7	K11D9.1	67	78	0	17	4	0
WBGene00002220	gcc-1	C15C7.2	0	0	0	1	0	0
WBGene00002220	klp-8	C15C7.2	0	0	0	1	0	0
WBGene00002221	klp-10	C33H5.4	0	1	0	1	0	0
WBGene00002222	klp-11	F20C5.2	0	0	0	3	0	0
WBGene00002223	klp-12	T01G1.1	1	14	0	25	0	2
WBGene00002224	klp-13	F22F4.3	0	0	0	0	0	0
WBGene00002225	klp-15	M01E11.6	24	27	0	19	0	0
WBGene00002226	klp-16	C41G7.2	120	51	0	14	3	0
WBGene00002227	klp-17	W02B12.7	0	0	0	0	0	0
WBGene00002228	klp-18	C06G3.2	30	45	0	14	2	1
WBGene00002229	klp-19	Y43F4B.6	96	32	0	22	0	0
WBGene00002230	klp-20	Y50D7A.6	0	0	0	5	0	1
WBGene00002231	knl-1	C02F5.1	0	9	0	17	1	0
WBGene00002232	kpc-1	F11A6.1	0	14	0	25	1	0
WBGene00002233	kqt-1	C25B8.1	0	0	0	2	0	0
WBGene00002234	kqt-2	M60.5	0	0	0	0	0	0
WBGene00002235	kqt-3	Y54G9A.3	0	0	0	0	0	0
WBGene00002238	kars-1	T02G5.9	238	167	0	54	13	0
WBGene00002239	ksr-1	F13B9.5	0	5	0	2	0	0
WBGene00002240	ksr-2	F58D5.4	1	35	10	2	1	0
WBGene00002241	kup-1	F10C2.2	2	21	0	1	1	0
WBGene00002242	kvs-1	C53C9.3	0	0	0	0	0	0
WBGene00002243	lad-2	Y54G2A.25	0	0	0	2	0	0
WBGene00002244	laf-1	Y71H2AM.19	21	120	134	42	24	1
WBGene00002245	lag-1	K08B4.1	133	151	0	31	24	0
WBGene00002246	lag-2	Y73C8B.4	0	0	0	0	0	0
WBGene00002247	lam-1	W03F8.5	123	73	0	43	0	4
WBGene00002248	lam-3	T22A3.8	0	0	0	24	0	0
WBGene00002249	lap-1	ZK353.6	55	36	0	17	5	0
WBGene00002250	lap-2	W07G4.4	546	264	1	30	8	3
WBGene00002251	lat-1	B0457.1	317	177	2	81	53	2
WBGene00002252	lat-2	B0286.2	0	0	0	1	0	0
WBGene00002253	lbp-1	F40F4.3	88	31	0	12	0	0
WBGene00002254	lbp-2	F40F4.2	0	0	0	0	0	0
WBGene00002255	lbp-3	F40F4.4	0	0	0	10	0	0
WBGene00002256	lbp-4	ZK742.5	0	3	0	0	1	0
WBGene00002257	lbp-5	W02D3.7	0	0	0	0	0	0
WBGene00002258	lbp-6	W02D3.5	0	0	0	2	0	0
WBGene00002259	lbp-7	T22G5.2	0	0	0	0	0	0
WBGene00002260	lbp-8	T22G5.6	0	0	0	0	0	0
WBGene00002261	ldb-1	F58A3.1	0	5	0	15	1	3
WBGene00002262	ldh-1	F13D12.2	4	25	0	12	0	0
WBGene00002263	lea-1	K08H10.1	193	232	0	14	9	0
WBGene00002264	lec-1	W09H1.6	145	34	1	8	0	0
WBGene00002265	lec-2	F52H3.7	0	0	0	1	0	0
WBGene00002266	lec-3	ZK892.1	0	7	0	4	0	0
WBGene00002267	lec-4	C44F1.3	0	0	0	0	0	0
WBGene00002268	lec-5	ZK1248.16	0	0	0	0	0	0
WBGene00002269	lec-6	Y55B1AR.1	0	0	0	0	0	0
WBGene00002270	lec-7	R07B1.2	0	0	0	0	0	0
WBGene00002271	lec-8	R07B1.10	0	0	0	0	0	0
WBGene00002272	lec-9	C16H3.2	0	0	0	2	0	0
WBGene00002273	lec-10	W01A11.4	0	0	0	0	0	0
WBGene00002274	lec-11	F38A5.3	0	0	0	0	0	0
WBGene00002275	lem-2	W01G7.5	66	72	0	22	2	3
WBGene00002276	lem-3	F42H11.2	0	25	0	14	11	0
WBGene00002278	lep-2		66	51	11	4	12	1
WBGene00002280	let-2	F01G12.5	0	20	0	45	45	31
WBGene00002282	let-4	C44H4.2	16	6	0	3	0	0
WBGene00002285	let-7	C05G5.6	0	0	0	0	0	0
WBGene00002295	let-19	K08F8.6	0	3	0	44	1	4
WBGene00002297	ect-2	T19E10.1	71	156	0	14	0	1
WBGene00002299	let-23	ZK1067.1	0	0	0	1	0	0
WBGene00002324	let-49	Y54E5B.3	1	32	0	7	4	2
WBGene00002335	let-60	ZK792.6	2	17	1	14	7	5
WBGene00002344	let-70	M7.1	72	150	0	64	30	3
WBGene00002348	myo-1	R06C7.10	0	1	0	4	0	0
WBGene00002363	let-92	F38H4.9	106	85	23	61	29	3
WBGene00002368	let-99	K08E7.3	0	62	0	42	1	0
WBGene00002393	lpr-1	Y65B4BR.2	0	0	0	1	0	0
WBGene00002497	let-268	F52H3.1	0	0	0	4	0	0
WBGene00002583	let-363	B0261.2	110	69	90	34	15	7
WBGene00002601	let-381	F26B1.7	0	0	0	0	0	0
WBGene00002632	let-413	F26D11.11	0	56	0	41	3	6
WBGene00002637	let-418	F26F12.7	0	65	0	35	1	0
WBGene00002694	let-502	C10H11.9	0	16	0	44	3	4
WBGene00002696	let-504	E01A2.4	0	6	0	4	0	0
WBGene00002717	let-526	C01G8.9	130	157	0	75	6	12
WBGene00002783	let-607	F57B10.1	21	360	16	79	18	0
WBGene00002804	let-630	Y110A7A.19	27	36	0	7	5	0
WBGene00002804	let-630		27	36	0	7	5	0
WBGene00002827	let-653	C29E6.1	0	0	0	1	0	0
WBGene00002845	let-711	F57B9.2	759	648	16	157	16	0
WBGene00002850	let-716	C16A3.3	94	59	0	109	3	0
WBGene00002855	let-721	C05D11.12	122	31	0	11	2	0
WBGene00002879	let-754	C29E4.8	1	31	0	5	4	6
WBGene00002881	let-756	C05D11.4	0	0	0	2	1	0
WBGene00002889	let-765	F20H11.2	29	52	4	62	9	13
WBGene00002891	let-767	C56G2.6	0	40	0	4	2	4
WBGene00002915	let-805	H19M22.2	0	0	0	18	0	1
WBGene00002957	let-858	F33A8.1	0	1	0	11	0	0
WBGene00002974	lev-1	F09E8.7	0	0	0	0	0	0
WBGene00002975	lev-8	C35C5.5	0	0	0	1	0	0
WBGene00002976	lev-9	T07H6.5	0	0	0	5	0	0
WBGene00002977	lev-10	Y105E8A.7	0	0	0	1	0	3
WBGene00002978	lev-11	Y105E8B.1	0	1	0	8	0	1
WBGene00002979	lfe-2	C46H11.4	59	13	1	1	0	0
WBGene00002980	lgg-1	C32D5.9	236	26	0	33	10	3
WBGene00002981	lgg-2	ZK593.6	113	134	1	22	11	0
WBGene00002982	lgg-3	B0336.8	4	21	0	0	0	0
WBGene00002983	lgx-1	C54G7.3	0	0	0	0	1	0
WBGene00002985	lig-1	C29A12.3	40	28	0	7	2	0
WBGene00002986	lig-4	C07H6.1	0	26	0	3	0	15
WBGene00002987	lim-4	ZC64.4	0	0	0	0	0	0
WBGene00002988	lim-6	K03E6.1	0	0	0	0	0	0
WBGene00002989	lim-7	C04F1.3	0	0	0	2	0	0
WBGene00002990	lin-1	C37F5.1	0	0	0	0	0	0
WBGene00002991	lin-2	F17E5.1	0	4	0	1	2	0
WBGene00002992	lin-3	F36H1.4	200	46	9	4	2	0
WBGene00002993	lin-4	F59G1.6	0	0	0	0	0	0
WBGene00002994	lin-5	T09A5.10	15	17	0	15	2	5
WBGene00002996	lin-7	Y54G11A.10	0	9	0	19	1	0
WBGene00002997	lin-8	B0454.1	1	2	0	1	0	0
WBGene00002998	lin-9	ZK637.7	0	36	0	4	0	0
WBGene00002999	lin-10	C09H6.2	69	2	0	27	1	19
WBGene00003000	lin-11	ZC247.3	0	0	0	0	0	0
WBGene00003001	lin-12	R107.8	27	24	0	4	0	0
WBGene00003002	lin-13	C03B8.4	9	41	0	63	4	0
WBGene00003003	lin-14	T25C12.1	0	0	0	3	0	0
WBGene00003006	lin-17	Y71F9B.5	0	0	0	20	0	0
WBGene00003007	lin-18	C16B8.1	0	31	0	2	0	1
WBGene00003008	lin-22	Y54G2A.1	0	0	0	0	0	0
WBGene00003009	lin-23	K10B2.1	24	110	0	17	3	17
WBGene00003010	lin-24	B0001.1	206	127	0	6	5	0
WBGene00003011	lin-25	F56H9.5	0	4	0	13	3	6
WBGene00003012	lin-26	F18A1.2	16	120	11	20	7	4
WBGene00003014	lin-28	F02E9.2	5	7	0	2	0	0
WBGene00003015	lin-29	W03C9.4	0	0	0	1	0	0
WBGene00003017	lin-31	K10G6.1	0	0	0	0	0	0
WBGene00003018	lin-32	T14F9.5	0	0	0	0	0	0
WBGene00003019	lin-33	H32C10.2	0	8	0	1	0	0
WBGene00003020	lin-35	C32F10.2	51	89	0	11	6	15
WBGene00003021	lin-36	F44B9.6	77	98	0	27	3	0
WBGene00003022	lin-37	ZK418.4	1	21	11	21	4	0
WBGene00003024	lin-39	C07H6.7	0	0	0	2	0	0
WBGene00003025	lin-40	T27C4.4	1	49	59	64	6	5
WBGene00003026	lin-41	C12C8.3	32	126	0	20	12	0
WBGene00003029	lin-44	E01A2.3	0	0	0	0	0	0
WBGene00003030	lin-45	Y73B6A.5	18	202	2	21	9	1
WBGene00003031	lin-46	R186.4	0	0	0	0	0	0
WBGene00003033	lin-48	F34D10.5	0	2	0	0	0	0
WBGene00003034	lin-49	F42A9.2	0	4	0	25	0	0
WBGene00003035	lin-52	ZK632.13	0	1	0	2	1	0
WBGene00003036	lin-53	K07A1.12	0	51	0	71	12	0
WBGene00003037	lin-54	JC8.6	0	9	0	8	0	0
WBGene00003038	lin-56	ZK673.3	0	5	0	2	0	0
WBGene00003039	lin-58	F56A12.3	0	0	0	0	0	0
WBGene00003040	lin-59	T12F5.4	25	130	0	12	1	0
WBGene00003041	lin-61	R06C7.7	7	5	0	11	0	0
WBGene00003043	lip-1	C05B10.1	0	8	0	7	0	1
WBGene00003044	lir-1	F18A1.3	56	6	10	13	1	14
WBGene00003045	lir-2	F18A1.4	0	5	0	10	0	2
WBGene00003046	lir-3	F37H8.1	0	0	0	0	0	0
WBGene00003047	lis-1	T03F6.5	26	95	1	20	3	0
WBGene00003048	lit-1	W06F12.1	5	80	0	62	8	5
WBGene00003052	lmn-1	DY3.2	1	179	11	55	19	0
WBGene00003053	lmp-1	C03B1.12	57	4	0	20	0	0
WBGene00003055	lon-1	F48E8.1	0	0	0	0	0	0
WBGene00003056	lon-2	C39E6.1	0	12	0	5	0	0
WBGene00003057	lon-3	ZK836.1	0	0	0	0	0	0
WBGene00003058	lov-1	ZK945.9	0	0	0	0	0	0
WBGene00003059	lpd-2	C48E7.3	0	2	0	0	0	0
WBGene00003060	lpd-3	Y47G6A.23	0	47	0	52	4	0
WBGene00003061	lpd-5	ZK973.10	0	15	0	7	2	0
WBGene00003062	lpd-6	K09H9.6	0	4	0	5	0	0
WBGene00003063	lpd-7	R13A5.12	0	0	0	9	0	0
WBGene00003064	lpd-8	R10H10.1	0	2	0	2	0	0
WBGene00003065	lpd-9	T21C9.5	0	2	0	20	2	0
WBGene00003066	lpl-1	ZC410.7	35	26	0	5	0	0
WBGene00003067	lrg-1	F55H2.4	0	0	0	8	0	0
WBGene00003068	lrk-1	T27C10.6	0	19	0	10	0	0
WBGene00003071	lrp-1	F29D11.1	0	11	0	23	1	4
WBGene00003072	lrp-2	T21E3.3	0	9	0	23	0	16
WBGene00003073	lars-1	R74.1	0	111	0	37	2	0
WBGene00003074	lars-2	ZK524.3	0	19	0	3	2	0
WBGene00003075	lrx-1	T04H1.6	0	0	0	0	0	0
WBGene00003076	lsm-1	F40F8.9	0	5	0	0	1	0
WBGene00003077	lsm-3	Y62E10A.12	2	1	0	5	1	1
WBGene00003078	lsm-4	F32A5.7	0	30	0	2	1	0
WBGene00003079	lsm-5	F28F8.3	0	4	0	3	0	0
WBGene00003080	lsm-6	Y71G12B.14	0	1	0	1	1	0
WBGene00003081	lsm-7	ZK593.7	0	0	0	14	0	0
WBGene00003082	lsm-8	Y73B6BL.32	0	2	0	0	2	0
WBGene00003083	lst-1	T22A3.3	150	164	0	19	15	2
WBGene00003084	lst-2	R160.7	0	30	0	3	1	2
WBGene00003085	lst-3	Y37A1B.1	1	77	0	43	2	3
WBGene00003086	lst-4	Y37A1B.2	225	69	0	46	5	0
WBGene00003087	lsy-2	F49H12.1	16	5	0	29	6	22
WBGene00003088	lsy-6	C32C4.6	0	0	0	0	0	0
WBGene00003089	ltd-1	K02C4.4	0	0	0	3	0	0
WBGene00003090	lys-1	Y22F5A.4	0	0	0	0	0	0
WBGene00003091	lys-2	Y22F5A.5	0	0	0	0	0	0
WBGene00003092	lys-3	Y22F5A.6	0	0	0	0	0	0
WBGene00003093	lys-4	F58B3.1	0	0	0	0	0	0
WBGene00003094	lys-5	F58B3.2	0	0	0	0	0	0
WBGene00003095	lys-6	F58B3.3	0	0	0	0	0	0
WBGene00003096	lys-7	C02A12.4	0	0	0	0	0	0
WBGene00003097	lys-8	C17G10.5	0	1	0	0	0	0
WBGene00003098	lys-9	C54C8.6	0	0	0	0	0	0
WBGene00003099	lys-10	F17E9.11	0	0	0	0	0	0
WBGene00003100	mab-3	Y53C12B.5	0	0	0	0	0	0
[truncated: 45,087 more rows]
